# Supplementary material for: The incidence and healthcare costs of persistent postoperative pain following lumbar spine surgery in the UK: a cohort study using the Clinical Practice Research Datalink (CPRD) and Hospital Episode Statistics (HES)
Source: PubMed Central journal article supplement — BMJ Open. 2017 Sep 11;7(9):e017585. doi: 10.1136/bmjopen-2017-017585 (PMC5595197; doi:10.1136/bmjopen-2017-017585), 2017-09-11
Supplement: bmjopen-2017-017585.draft_revisions.pdf [file bmjopen-2017-017585.draft_revisions.pdf]

# BMJ Open

BMJ Open is committed to open peer review. As part of this commitment we make the peer review history of every article we publish publicly available.

When an article is published we post the peer reviewers' comments and the authors' responses online. We also post the versions of the paper that were used during peer review. These are the versions that the peer review comments apply to.

The versions of the paper that follow are the versions that were submitted during the peer review process. They are not the versions of record or the final published versions. They should not be cited or distributed as the published version of this manuscript.

BMJ Open is an open access journal and the full, final, typeset and author-corrected version of record of the manuscript is available on our site with no access controls, subscription charges or pay-per-view fees (<http://bmjopen.bmj.com>).

If you have any questions on BMJ Open's open peer review process please email [editorial.bmjopen@bmj.com](mailto:editorial.bmjopen@bmj.com)

# BMJ Open

## The incidence and healthcare costs of persistent post-operative pain following lumbar spine surgery in the United Kingdom

|                                 |                                                                                                                                                                                                                                                                                                                                                                                                                                                                                                                                                                                   |
|---------------------------------|-----------------------------------------------------------------------------------------------------------------------------------------------------------------------------------------------------------------------------------------------------------------------------------------------------------------------------------------------------------------------------------------------------------------------------------------------------------------------------------------------------------------------------------------------------------------------------------|
| Journal:                        | <i>BMJ Open</i>                                                                                                                                                                                                                                                                                                                                                                                                                                                                                                                                                                   |
| Manuscript ID                   | bmjopen-2017-017585                                                                                                                                                                                                                                                                                                                                                                                                                                                                                                                                                               |
| Article Type:                   | Research                                                                                                                                                                                                                                                                                                                                                                                                                                                                                                                                                                          |
| Date Submitted by the Author:   | 02-May-2017                                                                                                                                                                                                                                                                                                                                                                                                                                                                                                                                                                       |
| Complete List of Authors:       | Weir, Sharada; University of Toronto, Centre for Addiction and Mental Health; PHMR Ltd,<br>Samnaliev, Mihail; Boston Childrens Hosp<br>Kuo, Tzu-Chun; PHMR Ltd<br>Ni Choitir, Caitriona; National Centre for Pharmacoeconomics<br>Tierney, Travis; Imperial College London<br>Cumming, David; Ipswich Hospital NHS Trust<br>Bruce, Julie; University of Warwick, Warwick Clinical Trials Unit<br>Manca, Andrea; York University<br>Taylor, Rod; University of Exeter, Peninsula Medical School<br>Eldabe, Sam; James Cook University Hospital, Department of Pain and Anaesthesia |
| <b>Primary Subject Heading</b>: | Epidemiology                                                                                                                                                                                                                                                                                                                                                                                                                                                                                                                                                                      |
| Secondary Subject Heading:      | Health economics                                                                                                                                                                                                                                                                                                                                                                                                                                                                                                                                                                  |
| Keywords:                       | Persistent post-operative pain (PPP), Failed Back Surgery Syndrome (FBSS), Lumbar surgery, Clinical Practice Research Datalink (CPRD), Hospital Episode Statistics (HES)                                                                                                                                                                                                                                                                                                                                                                                                          |
|                                 |                                                                                                                                                                                                                                                                                                                                                                                                                                                                                                                                                                                   |

SCHOLARONE™  
Manuscripts

1  
2  
3 **The incidence and healthcare costs of persistent post-operative pain following lumbar**  
4 **spine surgery in the United Kingdom**  
5  
6

7 Sharada Weir, DPhil<sup>1,2</sup>, Mihail Samnaliev, PhD<sup>1,3</sup>, Tzu-Chun Kuo, PhD<sup>1</sup>, Caitriona Ni Choitir,  
8 MSc, MPharm<sup>4</sup>, Travis S Tierney, MD, DPhil<sup>5</sup>, David Cumming, MbChB<sup>6</sup>, Julie Bruce, PhD<sup>7</sup>,  
9 Andrea Manca, MSc, PhD<sup>8</sup>, Rod S Taylor, PhD<sup>9</sup>, and Sam Eldabe, MD<sup>10</sup>  
10  
11  
12  
13

14  
15  
16  
17 **Author affiliations:**  
18

- 19 1. PHMR, Ltd., London, UK  
20  
21 2. Institute for Mental Health Policy Research, Centre for Addiction and Mental Health,  
22 Toronto, CA  
23  
24 3. Boston Children's Hospital, Harvard Medical School, Boston, US  
25  
26 4. National Centre for Pharmacoeconomics, Dublin, IE  
27  
28 5. Imperial College, London, UK  
29  
30 6. Ipswich Hospital, Ipswich UK  
31  
32 7. Warwick Clinical Trials Unit, Warwick Medical School, University of Warwick, UK  
33  
34 8. Centre for Health Economics, York University, York, UK  
35  
36 9. University of Exeter Medical School, Exeter, UK  
37  
38 10. The James Cook University Hospital, Middlesbrough, UK  
39  
40  
41  
42  
43  
44  
45  
46  
47

48 **Address for correspondence:**  
49

50 Sharada Weir, DPhil, PHMR, Ltd., Bldg D, Berkeley Works, Berkley Grove, London, NW1 8XY,  
51 United Kingdom; E-mail: sharadaweir@phmr.com; Tel: 011-44-208-365-2185.  
52  
53  
54  
55

56  
57 **Word Count:** 2,862  
58  
59  
60

## Abstract

**Objective:** To characterize incidence and healthcare costs associated with persistent post-operative pain (PPP) following lumbar surgery.

**Design:** Retrospective, population-based cohort study.

**Setting** Clinical Practice Research Datalink (CPRD) and Hospital Episode Statistics (HES) databases.

**Participants:** Population-based cohort of 10,216 adults who underwent lumbar surgery in England from 1997/98 through 2011/12 and had at least one year of pre-surgery data and two years of postoperative follow-up data in the linked CPRD-HES.

**Primary and secondary outcomes measures:** Incidence and total healthcare costs over 2, 5, and 10 years attributable to persistent postoperative pain following initial lumbar surgery.

**Results:** The rate of individuals undergoing lumbar surgery in the CPRD-HES linked data doubled over the 15-year study period, fiscal years 1997/98 to 2011/12, from 2.5 to 4.9 per 10,000 adults. Over the most recent five-year period (2007/08 to 2011/12), on average 20.8% [95% CI: 19.7% to 21.9%] of lumbar surgery patients met criteria for PPP. Rates of health care utilisation were significantly higher for patients with PPP across all types of care. Over two years following initial spine surgery, the mean cost difference between patients with and without PPP was £5,383 [95% CI: £4,872-£5,916]. Over five and ten years following initial spine surgery, the mean cost difference between patients with and without PPP increased to £10,195 [95% CI: 8,726 to 11,669] and £14,318 [95% CI: £8,386 to 19,771], respectively. Extrapolated to the UK population, we estimate nearly 5,000 adults experience PPP after spine surgery annually, with each new cohort costing the UK NHS in excess of £70 million over the first 10 years alone.

1  
2  
3 **Conclusions:** Persistent pain affects more than one-in-five lumbar surgery patients and  
4  
5 accounts for substantial long term health care costs. There is a need for formal, evidence-  
6  
7 based guidelines for a coherent, coordinated management strategy for patients with  
8  
9 continuing pain after lumbar surgery.  
10  
11

12  
13  
14 **Keywords:**

15  
16  
17 Persistent post-operative pain (PPP); Failed back surgery syndrome (FBSS); lumbar surgery;  
18  
19 Clinical Practice Research Datalink (CPRD); Hospital Episode Statistics (HES)  
20  
21

22  
23  
24 **Strengths and limitations of this study**

- 25  
26  
27
  - This is the first study to estimate the occurrence of PPP following lumbar surgery  
28  
29 using a sample of surgical patients selected from routinely collected UK hospital and  
30  
31 primary care data  
32
  - Our estimates of healthcare utilisation and costs are based on real world experiences  
33  
34 of the full range of lumbar surgery patients found in clinical practice  
35  
36
  - A limitation of using electronic medical records data is the classification of patients  
37  
38 with PPP as there is a no specific diagnosis code or set of codes for the condition of  
39  
40 PPP and our data do not contain information on pain scores commonly used to  
41  
42 assess the existence and severity of chronic pain following recovery from surgery  
43  
44
  - In contrast with previous studies that have relied on multiple assumptions regarding  
45  
46 treatment patterns or on small and/or non-representative patient samples, we were  
47  
48 able to calculate more precise estimates of PPP following lumbar surgery  
49  
50  
51  
52  
53  
54  
55  
56  
57  
58  
59  
60

## INTRODUCTION

Persistent post-operative pain in lumbar surgery patients—more commonly known as failed back surgery syndrome (FBSS)—refers to chronic back and/or leg pain that continues or recurs in some patients following spinal surgery. It may be caused by one or a combination of factors including: residual or recurrent disc herniation, persistent post-operative compression of a spinal nerve, altered joint mobility, joint instability, scar tissue (fibrosis), and spinal muscular deconditioning.[1-3] Patients form a diverse group, with complex and varied aetiologies and symptoms.[4,5]

Authoritative publications, mainly large case series and clinical trials, report that 10-40% of all patients who undergo lumbar surgery develop some form of chronic post-operative pain.[6-14] In 2013, Thompson took a mid-range estimate of 20% failure applied to a rate of lumbar surgery in the UK population of 5 per 10,000 people and concluded that there are approximately 6,000 new cases of PPP following spine surgery in the UK every year.[15] More precise estimates for the UK are not available.

Up-to-date, population-based estimates of incidence are needed to keep pace with surgical advances and to inform health care system spending in this population. Using a formal and more rigorous epidemiological data-driven approach, we aim to provide robust estimates of the incidence and health care costs associated with PPP following lumbar surgery in the UK over a 15-year period, from 1997/98-2011/12.

## METHODS

### Setting and data sources

This study employs a retrospective cohort design using two linked UK databases: the Hospital Episode Statistics (HES) database and UK Clinical Practice Research Datalink (CPRD).

1  
2  
3 A supplementary online appendix provides more detail on these data. Approval was granted  
4  
5 by the Independent Scientific Advisory Committee for Medicines and Healthcare products  
6  
7 Regulatory Agency (MHRA) on December 17, 2014 (ISAC Protocol 14-180R).  
8  
9

### 10 11 12 **Study participants**

13  
14 Incidence of lumbar surgery was calculated on a patient-basis, as the number of patients  
15  
16 aged 18 and above who underwent one or more lumbar procedures in a given fiscal year,  
17  
18 expressed as a rate per 10,000 adults in the CPRD-HES linked dataset. Index operative  
19  
20 procedures included any single procedure or combination of discectomy/microdiscectomy,  
21  
22 excision of lumbar intervertebral disc, laminectomy, foraminotomy, lumbar decompression  
23  
24 (or fenestration) or lumbar fusion (including all anterior and posterior approaches as well as  
25  
26 combined approaches). Patients were required to have at least two years of follow up data  
27  
28 to allow sufficient time to observe criteria for PPP following the index surgery.  
29  
30  
31  
32  
33  
34  
35

### 36 **Definition of Persistent Postoperative Pain**

37  
38 From our lumbar surgery cohort, we categorized each individual as a 'success' (i.e., no  
39  
40 evidence of PPP) or 'failure' (i.e., evidence of PPP). Any one of the following three criteria,  
41  
42 alone or in combination, were taken as evidence of pain continuing past the expected  
43  
44 period for recovery following index lumbar surgery:  
45  
46

- 47 1. any additional lumbar surgery of any type occurring between 6-24 months post-  
48  
49 index surgery;
- 50  
51 2. a minimum of one pain-related physician visit in each of two consecutive quarters at  
52  
53 any point during the 6-24 months post-index surgery identified using READ codes in  
54  
55 CPRD or treatment specialty codes in the HES Outpatient file;  
56  
57  
58  
59  
60

1  
2  
3 3. any other surgical intervention (e. g., neuromodulation, implantation of drug  
4  
5 infusion delivery system) to address pain occurring at any time, not limited to 24  
6  
7 months after the index surgery, identified from either CPRD or the HES inpatient or  
8  
9 outpatient datasets.  
10

11  
12  
13  
14  
15 Prescription of analgesics (including opioids, non-steroidal anti-inflammatory drugs  
16  
17 (NSAIDs), antidepressants or anticonvulsants/antiepileptic drugs used for pain, and other  
18  
19 analgesic therapies for a period of at least 6 months from 6-24 months post-index) was not  
20  
21 by itself considered evidence of persistent postoperative pain as patients may be prescribed  
22  
23 analgesics for other painful conditions.  
24  
25

26  
27 A minimum period of three months has been proposed for tissue healing after  
28  
29 surgery and this time period is also used to define chronicity of pain.[16-18] We applied a  
30  
31 more stringent, minimum six-month period after the index lumbar surgery for patients to  
32  
33 recover from normal, expected postoperative pain. Any additional spine surgery that  
34  
35 occurred during that period was assumed to be related to surgical complications of the  
36  
37 index lumbar procedure, rather than treatment of PPP. The literature suggests that some  
38  
39 patients initially appear to improve following lumbar surgery but later become increasingly  
40  
41 bothered by pain.[4,19,20] Therefore, we allowed for a period of 18 months (6-24 months  
42  
43 post-index surgery) over which to evaluate evidence of unresolved, chronic pain based on  
44  
45 recorded ongoing interventions.  
46  
47  
48  
49  
50

### 51 52 53 **Healthcare utilisation and costs**

54  
55 A standard cost-of-illness approach[21,22] was taken to estimate total healthcare costs from  
56  
57 the perspective of the UK National Health Service (NHS). We classified all health care  
58  
59



1  
2  
3 encounters into major categories of health care resource utilisation and assigned unit costs  
4  
5 following standard practice for cost-of-illness and cost effectiveness research (see online-  
6  
7 only supplementary information on cost methodology and unit cost tables). Consistent with  
8  
9 other studies of resource utilisation among similar populations,[23] we estimated total cost  
10  
11 per patient over 24 months for all patients in our study (excluding the cost of the index  
12  
13 surgery). We then extended our analysis out to five and ten years post-index surgery among  
14  
15 the subsets of patients with sufficient follow up data. To account for inflation and variations  
16  
17 in pricing over time, 2013 unit costs were applied to all years. Total costs incorporated direct  
18  
19 (including medical staff), indirect and overhead costs paid by the NHS. Finally, using these  
20  
21 per patient estimates, we projected the total number of PPP cases in the UK annually and  
22  
23 the associated costs to the NHS.  
24  
25  
26  
27  
28  
29  
30

### 31 **Statistical analyses**

32  
33 To estimate rates of PPP, we computed the number of patients who met our criteria for PPP  
34  
35 as a percentage of all patients who underwent initial lumbar surgery within the time frame.  
36  
37 The comparison group of no persistent post-operative pain was drawn from among lumbar  
38  
39 surgery patients who fulfilled the 'no PPP' criteria. We used 1:1 propensity score matching  
40  
41 (without replacement) based on patient's age at surgery, gender, year in which surgery took  
42  
43 place, type of initial surgery (fusion vs. decompression), and presence of each of seventeen  
44  
45 comorbidities that comprise the Charlson Comorbidity index (CCI) using the greedy  
46  
47 matching algorithm.[24-26]  
48  
49  
50  
51

52  
53 We estimated healthcare utilisation over a two-year period for patients with PPP  
54  
55 versus the matched controls and presented: (i) the proportion of patients who had a non-  
56  
57 zero healthcare resource utilisation and the number of encounters by category (i.e., primary  
58  
59  
60

1  
2  
3 care, inpatient care, outpatient attendances, outpatient procedures, accident and  
4  
5 emergency care, and prescriptions for pain medications), and (ii) costs among users of the  
6  
7 respective type of services/events (in order to provide insight into the intensity of resource  
8  
9 utilisation among users of these services). Next, we estimated total health care costs by  
10  
11 category of health care utilisation for all patients. Finally, we estimated the cost attributable  
12  
13 to PPP as the difference in total costs for all PPP patients versus no PPP controls over the  
14  
15 time periods two, five and ten years post-index surgery.  
16  
17  
18

19  
20 Statistical significance of differences between patients with and without PPP were  
21  
22 evaluated using Fisher's exact tests for categorical predictor variables and Wilcoxon tests for  
23  
24 continuous predictor variables. The main analyses compared the matched PPP cases and  
25  
26 controls using Fisher's exact tests for healthcare utilisation and bootstrapping for  
27  
28 differences in average costs. All data manipulation and analyses were conducted using SAS  
29  
30 software, Version 9.4 for Windows [SAS Institute, Cary NC].  
31  
32  
33  
34  
35

### 36 **Sensitivity analysis**

37  
38 In sensitivity analyses, we adjusted costs using generalised linear models (using log link and  
39  
40 gamma distribution), extended estimating equations, and ordinary least squares.  
41  
42  
43  
44

## 45 **RESULTS**

### 46 **Rates of lumbar surgery in HES (among patients with linked CPRD data)**

47  
48 From the linked CPRD-HES database, we identified 10,216 adults who underwent lumbar  
49  
50 surgery from fiscal years 1997/98 through 2011/12 and who had at least 12 months of pre-  
51  
52 surgery data (used to identify pre-surgical comorbid conditions and exclude those with  
53  
54 previous lumbar surgery) and with 24 months follow up. Incidence of PPP was adjusted to  
55  
56  
57  
58  
59  
60

1  
2  
3 reflect the age and sex distribution of the UK population in each year of the study.[27] The  
4  
5 age/sex adjusted rate of lumbar surgeries grew steadily from 2.41 per 10,000 in 1997/98 to  
6  
7 reach a peak of 4.94 per 10,000 in 2010/11 before falling slightly in 2011/12 to 4.70 per  
8  
9 10,000. The denominator included all patients within the linked CPRD/HES dataset with at  
10  
11 least 36 months of follow-up to be comparable to the lumbar surgery group (Figure 1).  
12  
13

### 14 15 16 17 **Percentage of lumbar surgery patients with persistent postoperative pain (cases)**

18  
19 Of the 10,216 adults undergoing lumbar surgery in fiscal years 1997/98-2011/12, 1,756  
20  
21 (17.2%; 95% CI: 16.5% to 17.9%) patients met our criteria for PPP. Among patients with PPP,  
22  
23 85.4% were prescribed pain medication for at least six months compared with 50.3% of  
24  
25 patients who did not meet PPP criteria.  
26  
27

28  
29 Figure 2 shows the impact on our estimates of PPP from including the HES outpatient  
30  
31 data, available from 2008 onwards. The dotted line includes patients identified as having  
32  
33 PPP using only the CPRD general practice file plus HES inpatient file. The solid line includes  
34  
35 patients identified using these files plus the HES outpatient file, accredited as a National  
36  
37 Statistic since 2008. The percentage of patients with PPP captured without the HES  
38  
39 outpatient file was fairly stable over the entire 15-year study period, but doubles with the  
40  
41 inclusion of HES outpatient data. The percentage of patients with PPP early in the study  
42  
43 period is likely to be underestimated as hospital pain clinic visits were not recorded. The  
44  
45 more recent data is more likely to be reflective of current UK practice. On average, over the  
46  
47 most recent five-year period, 20.8% [95% CI: 19.7% to 21.9%] of eligible patients met our  
48  
49 criteria for PPP.  
50  
51  
52  
53  
54  
55  
56  
57  
58  
59  
60

### PPP cases versus lumbar surgery patients without PPP

Prior to matching, a comparison of patients with PPP versus those without showed that PPP patients were younger, more likely to be female and have a slightly higher comorbidity burden, as measured by the Charlson Comorbidity Index. After propensity score matching, as expected, there were no significant differences between the cases and controls (Table 1).

**Table 1:** Characteristics of lumbar surgery patients with and without PPP before and after selecting propensity score matched control group

|                                             | Before matching |                |         | After matching |                |         |
|---------------------------------------------|-----------------|----------------|---------|----------------|----------------|---------|
|                                             | No PPP          | PPP            | P value | No PPP         | PPP            | P value |
|                                             | n=8460          | n=1756         |         | n=1756         | n=1756         |         |
| Age at surgery (years), mean (sd)           | 53.6<br>(16.0)  | 52.9<br>(15.5) | 0.044   | 52.1<br>(16.0) | 52.9<br>(15.5) | 0.16    |
| Male, %                                     | 50.7            | 43.3           | <0.001  | 43.0           | 43.3           | 0.86    |
| Charlson Comorbidity Index (CCI), mean (sd) | 1.1<br>(2.0)    | 1.2<br>(2.0)   | 0.002   | 1.1<br>(1.8)   | 1.2<br>(2.0)   | 0.06    |

P-values were based on Fisher's exact tests for categorical and Wilcoxon tests for continuous variables.

### Health care utilisation and cost

Compared to patients without, those with PPP had significantly increased rates of health care utilisation for all health care encounter types. The difference was largest for inpatient hospital care at 77.5% for those with PPP versus 44.9% for those without. Patients with PPP were more than twice as likely as those without PPP to have had two or more inpatient stays in the two years following index surgery.

Amongst those who used care in each of these settings, costs were in most cases significantly greater in the presence of PPP. In particular, PPP was associated with a three-

fold increase in average pain medication costs (£1,165 versus £382). Greater costs were also observed in inpatient, outpatient hospital and primary care settings, indicating greater intensity of resource utilisation for patients with PPP in each of these settings (Table 2). Comparing total costs for patients with PPP versus matched controls (no PPP) including both users and non-users of each service, we found that the mean additional cost attributable to PPP in the two years following surgery was £5,383 per patient (Table 3). Inpatient costs accounted for almost half (46.5%) of the cost differential and primary care contributed 26.9%.

**Table 2:** Health care resource use and costs (2013 British Pounds) in the two year period following index surgery among users of services, cases (PPP) versus propensity score matched controls (no PPP)

|                            | Health care utilisation |                 | Costs among users only |                   |
|----------------------------|-------------------------|-----------------|------------------------|-------------------|
|                            | No PPP (N=1756)         | PPP (N=1756)    | No PPP                 | PPP               |
|                            | n (%)                   | n (%)           | mean (sd)              | mean (sd)         |
| Any inpatient              | 788 (44.9)              | 1,361 (77.5) ** | £3,678 (4,520)         | £5,357 (5,282) ** |
| 0                          | 968 (55.1)              | 395 (22.5)      |                        |                   |
| 1                          | 377 (21.5)              | 484 (27.6)      |                        |                   |
| 2                          | 192 (10.9)              | 351 (20.0)      |                        |                   |
| >2                         | 219 (12.5)              | 526 (29.9)      |                        |                   |
| Any Outpatient attendances | 1,510 (86.0)            | 1,606 (91.5) ** | £783 (975)             | £1,316 (1,149) ** |
| 0                          | 246 (14.0)              | 150 (8.5)       |                        |                   |
| 1 - 6                      | 904 (51.5)              | 438 (24.9)      |                        |                   |
| 7-12                       | 349 (19.9)              | 512 (29.2)      |                        |                   |
| > 12                       | 257 (14.6)              | 656 (37.4)      |                        |                   |
| Any Outpatient             | 435 (24.8)              | 583 (33.2) **   | £540 (817)             | £664 (875) *      |

|                                          |    |              |                 |                |                   |
|------------------------------------------|----|--------------|-----------------|----------------|-------------------|
| procedures                               |    |              |                 |                |                   |
|                                          | 0  | 1321 (75.2)  | 1,173 (66.8)    |                |                   |
|                                          | 1  | 203 (11.6)   | 221 (12.6)      |                |                   |
|                                          | 2  | 86 (4.9)     | 116 (6.6)       |                |                   |
|                                          | >2 | 146 (8.3)    | 246 (14.0)      |                |                   |
| <hr/>                                    |    |              |                 |                |                   |
| Any Accident & emergency                 |    | 325 (18.5)   | 484 (27.6) **   | £257 (193)     | £265 (213)        |
|                                          | 0  | 1,431 (81.5) | 1,272 (72.4)    |                |                   |
|                                          | 1  | 205 (11.7)   | 306 (17.4)      |                |                   |
|                                          | 2  | 67 (3.8)     | 94 (5.4)        |                |                   |
|                                          | >2 | 53 (3.0)     | 84 (4.8)        |                |                   |
| <hr/>                                    |    |              |                 |                |                   |
| Any Primary care                         |    | 1,751 (99.7) | 1,756 (100.0) * | £3,178 (2,560) | £4,616 (3,011) ** |
| Number of primary care visits, mean (sd) |    | 73.3 (57.8)  | 107.5 (68.3)    |                |                   |
| <hr/>                                    |    |              |                 |                |                   |
| Any pain drugs                           |    | 1,699 (96.7) | 1,750 (99.7) ** | £382 (2,348)   | £1,165 (4,349) ** |
| Number of prescriptions, mean (sd)       |    | 70.1 (98.6)  | 104.9 (104.0)   |                |                   |

\* < .05; \*\* < .01 comparing rates of health care use (using Fisher's exact tests) and mean costs (based on bootstrapping) among patients with PPP vs. no PPP; PPP=persistent postoperative pain.

When costs estimates were extended to five and ten-years following the index lumbar surgery, among patients with sufficient follow up data for each period, the difference in costs between patients with and without PPP increased. In total over five years following surgery, patients with PPP (n=894 cases) cost an additional mean of £10,195 [95% CI: 8,726 to 11,669], rising to a total mean cost differential of £14,318 [95% CI: 8,386 to 19,771] over 10 years (n=186 cases). Note that the difference may have been

underestimated for patients who underwent surgery prior to the release of the HES outpatient files in 2003/04.

**Table 3:** Total 2-year costs (2013 British Pounds), cases (PPP) versus propensity score matched control cohort (no PPP)

|                        | No PPP<br>(N=1, 756)<br>Mean (sd) | PPP<br>(N=1, 756)<br>Mean (sd) | Difference | [95% CIs]     |
|------------------------|-----------------------------------|--------------------------------|------------|---------------|
| Inpatient              | £1,651 (3,537)                    | £4,152 (5,160)                 | £2,501     | [2,202-2,811] |
| Outpatient attendances | £673 (944)                        | £1,204 (1,159)                 | £531       | [456-604]     |
| Outpatient procedures  | £134 (469)                        | £221 (593)                     | £87        | [51-121]      |
| Accidents & emergency  | £48 (130)                         | £73 (163)                      | £25        | [15-35]       |
| Primary care           | £3,169 (2,562)                    | £4,616 (3,011)                 | £1,447     | [1,263-1,661] |
| Pain medications       | £370 (2,310)                      | £1,161 (4,342)                 | £791       | [574-1,027]   |
| Total costs            | £6,044 (6,712)                    | £11,427 (9,304)                | £5,383     | [4,872-5,916] |

### Sensitivity analyses

Estimating the PPP cost differential with generalised linear models (using log link and gamma distribution), extended estimating equations, and ordinary least squares produced very similar results to the main analysis.

### DISCUSSION

A total of 10,216 adults identified within the linked CPRD-HES database underwent lumbar spinal surgery between 1997/98 and 2011/12, with the rate of individuals receiving surgery approximately doubling over this time period. Using the criteria of additional lumbar surgery within 6-24 months, pain-related physician visits over at least two consecutive quarters

1  
2  
3 within the same period, or other surgical intervention therapy at any time, we estimate that  
4  
5 approximately one in five (20.8%; 95% CI: 18.5% to 23.0%) lumbar spine surgery patients in  
6  
7 the UK experience persistent post-operative pain within two years of their index surgery.  
8  
9  
10 The costs of PPP patients over 10 years following lumbar surgery were more than 50%  
11  
12 higher compared to those patients without ongoing pain.  
13

14  
15 Our estimate of PPP was conservative in that we did not include patients who had  
16  
17 ongoing prescriptions for analgesic pain medications in the absence of other more rigorous  
18  
19 indicators of back pain. If we had included any prescribing of pain medication, our estimate  
20  
21 of post-lumbar surgery PPP incidence would have risen from 20.8% to 61.8%.  
22  
23

#### 24 25 26 **Strengths and limitations of this study**

27  
28 This study used routinely captured hospital and primary care data to investigate diagnoses  
29  
30 and treatment patterns on a population sample of lumbar surgery patients. Hence, our  
31  
32 observations are based on patterns of care for a large and representative group of patients  
33  
34 undergoing treatment in real world settings. This enabled us to calculate more precise  
35  
36 estimates of PPP following lumbar surgery; previous studies have relied on multiple  
37  
38 assumptions regarding treatment patterns or on randomised controlled clinical trial data  
39  
40 with small, non-representative patient samples.  
41  
42  
43  
44

45  
46 A limitation of using electronic medical records data is the classification of patients  
47  
48 with PPP. There is a no specific diagnosis code or set of codes for the condition of PPP.  
49  
50 Instead, our estimates are based upon presentation for further interventions, surgery  
51  
52 and/or attendance at specialist pain clinics. The data do not contain information on pain  
53  
54 scores commonly used to assess the existence and severity of chronic pain following  
55  
56 recovery from surgery. Evidence on the persistence of pain for a period of at least six  
57  
58  
59  
60



1  
2  
3 months in the year following surgery was, by necessity, inferred from data on receipt of  
4  
5 therapies for chronic pain, referrals to pain specialists, etc. It is possible that some patients  
6  
7 who had a successful outcome of back surgery experienced ongoing concurrent or new  
8  
9 onset chronic pain from another source and were misclassified as having post-lumbar PPP.  
10  
11  
12  
13

### 14 15 **Implications of our findings for policy and/or practice**

16  
17 Our findings are based on a broadly representative sample of the UK population undergoing  
18  
19 lumbar surgery. The mid-2012 population estimate of adults in the UK was 50.2 million.[28]  
20  
21 Based on our estimates of lumbar surgery, we would predict that approximately 23,592  
22  
23 patients underwent initial lumbar surgery in the UK at the end of our study period. This  
24  
25 equates to 4,907 adults (20.8%) with PPP following lumbar surgery annually in the UK and  
26  
27 that the associated short term (2-year) costs of caring for PPP amount to approximately  
28  
29 £26.4 million for each new annual cohort of PPP patients. Extending our horizon to cover 10  
30  
31 years following index surgery, we would predict that each new annual cohort of lumbar  
32  
33 surgery patients experiencing PPP could cost the NHS approximately £70.3 million over the  
34  
35 first decade, with costs likely to continue accumulating over the remainder of the lifespan of  
36  
37 members of that cohort.  
38  
39  
40  
41  
42

43 Despite these large and ongoing costs, no formal guidelines to date have been put  
44  
45 forward for the treatment of persistent pain after lumbar surgery. Our findings for patients  
46  
47 with available follow-up data for two, five and ten years postoperatively suggest that PPP  
48  
49 patients have significantly higher resource utilisation and that these costs continue for at  
50  
51 least a decade following index surgery. Although our data contained too few patients with  
52  
53 more than 10 years of follow up to extend our estimates beyond the initial decade, it is  
54  
55 likely that the PPP cost differential persists into the long term particularly as patients' age.  
56  
57  
58  
59  
60

1  
2  
3 Our 10 year estimate is a censored estimate of the total lifetime cost of managing these  
4  
5 patients.  
6

7  
8 The growth in rates of lumbar surgery suggests that the numbers of patients living  
9  
10 with ongoing pain in the UK is substantial and growing. In addition to the NHS cost burden,  
11  
12 we know from other studies that these patients experience significant reduction in health-  
13  
14 related quality of life. For example, in the PROCESS study, mean baseline EQ5D index score  
15  
16 among lumbar surgery patients with ongoing pain was 0.14,[29] which is much lower than  
17  
18 has been documented for other patient populations with chronic diseases, including  
19  
20 cancer.[30] There is a need for a coherent management strategy for primary care staff, pain  
21  
22 specialists and surgeons to offer to these patients. High quality primary studies are urgently  
23  
24 required to provide more understanding of the treatment and recovery trajectory of this  
25  
26 patient group.  
27  
28  
29  
30  
31  
32

### 33 **CONCLUSION**

34  
35 Utilising routinely-collected clinical data, this study shows that approximately one-in-five  
36  
37 lumbar spine surgery patients in the UK experience PPP (also known as, ‘failed back surgery  
38  
39 syndrome’). PPP is associated with higher rates of resource utilisation and with increased  
40  
41 intensity of resource use in the inpatient, outpatient, and primary care settings. The costs to  
42  
43 the NHS of treating patients with PPP are substantive and remain elevated over time,  
44  
45 highlighting the need for formalized national guidelines for the management of patients  
46  
47  
48 with lumbar pain pre- and post-surgery.  
49  
50  
51  
52  
53  
54  
55  
56  
57  
58  
59  
60

**ACKNOWLEDGEMENTS**

This study was supported by Medtronic International Trading Sàrl, Switzerland and was based in part on data from the Clinical Practice Research Datalink obtained under license from the UK Medicines and Healthcare products Regulatory Agency. However, the interpretation and conclusions contained in this study are those of the authors alone.

For peer review only

1  
2  
3 **Contributors:** SE, AM, RST and SW conceived and designed the study originally; JB and DC  
4  
5 joined the study team part way through the analysis planning phase and helped to shape  
6  
7 the final study design. SW acquired the data. CNC, TCK, MS, TT and SW developed the  
8  
9 analysis plan. TCK, MS and SW analysed the data. SW drafted the manuscript. JB, DC, SE,  
10  
11 TCK, AM, MS, RST, TT and SW revised the manuscript. All authors contributed intellectually  
12  
13 to the interpretation of the data, participated in manuscript development and approved the  
14  
15 final version. SW is the guarantor.  
16  
17  
18  
19

20  
21 **Competing Interests:** At the time of the study, CNC was employed by PHMR, LLC, who  
22  
23 received consulting fees from Medtronic. SW, MS and TCK received consulting fees from  
24  
25 PHMR, LLC. RST, AM, JB, DC and SE received consulting fees from Medtronic as advisors to  
26  
27 the project. TST has no competing interests associated with this work.  
28  
29  
30  
31

32  
33 **Funding:** This study was supported by Medtronic International Trading Sàrl, Switzerland.  
34  
35 However, Medtronic did not play a direct role in the study design; in the collection, analysis  
36  
37 and interpretation of data; in the writing of the report; and in the decision to submit the  
38  
39 manuscript for publication.  
40  
41  
42  
43

44  
45 **Data sharing:** No additional data are available.  
46  
47  
48  
49  
50  
51  
52  
53  
54  
55  
56  
57  
58  
59  
60

## REFERENCES

- 1 Hazard RG. Failed back surgery syndrome: surgical and non-surgical approaches. *Clin Orthop Relat R* 2006;443:228–232.
- 2 Van Buyten JP, Linderoth B. “The failed back surgery syndrome”: definition and therapeutic algorithms – an update. *Eur J Pain Suppl* 2010;4:273–286.
- 3 Bokov A, Istrellov A, Skorodumov A, Aleynik A, Simonov A, Mlyavykh S. An analysis of reasons for failed back surgery syndrome and partial results after different types of surgical lumbar nerve root decompression. *Pain Physician* 2011;14:545–557.
- 4 Slipman CW, Shin CH, Patel RK, et al. Etiologies of Failed Back Surgery Syndrome. *Pain Med* 2002;3:200-14; discussion 214–7.
- 5 Tharmanathan P, Adamson J, Ashby R, Eldabe S. Diagnosis and treatment of failed back surgery syndrome in the UK: mapping of practice using a cross-sectional survey. *Br J Pain* 2012;6:142–152.
- 6 Yorimitsu E, Chiba K, Toyama Y, Hirabayashi K, McCulloch JA. Long-term outcomes of standard discectomy for lumbar disc herniation: a follow-up study of more than 10 years. *Spine (Phila Pa 1976)* 2001;26:652–657.
- 7 Javid MJ, Hadar EJ. Long-term follow-up review of patients who underwent laminectomy for lumbar stenosis: a prospective study. *J Neurosurg* 1998;89:1–7.
- 8 Andrews DW, Lavyne MH. Retrospective analysis of microsurgical and standard lumbar discectomy. *Spine (Phila Pa 1976)* 1990;15:329–335.
- 9 Caspar W, Campbell B, Barbier DD, Gotfried Y. The Caspar microsurgical discectomy and comparison with a conventional standard lumbar disc procedure. *Neurosurgery* 1991;28:78–87.

- 1  
2  
3 10 Frymoyer JW, Hanley E, Howe J, Kuhlmann D, Matteri R. Disc excision and spine fusion  
4  
5 in the management of lumbar disc disease. A minimum ten year follow-up. *Spine*  
6  
7 (*Phila Pa 1976*) 1978;3:1–6.  
8  
9  
10 11 Ross JS, Robertson JT, Frederickson RC, et al. Association between peridural scar and  
11  
12 recurrent radicular pain after lumbar discectomy: Magnetic resonance evaluation.  
13  
14 ADCON-L European Study Group. *Neurosurgery* 1996;38:855–861.  
15  
16  
17 12 Fritsch EW, Heisel J, Rupp S. The failed back surgery syndrome: Reasons,  
18  
19 intraoperative findings, and long-term results: A report of 182 operative treatments.  
20  
21 *Spine (Phila Pa 1976)* 1996;21:626–633.  
22  
23  
24 13 North RB, Kidd DH, Zahurak M, James CS, Long DM. Spinal cord stimulation for  
25  
26 chronic, intractable pain: experience over two decades. *Neurosurgery* 1993;32:384–  
27  
28 394.  
29  
30  
31 14 Wilkinson HA. *The Failed Back Syndrome: Etiology and Therapy*. Philadelphia: *Harper*  
32  
33 *& Row*, 1991.  
34  
35  
36 15 Thomson S. Failed back surgery syndrome—definition, epidemiology and  
37  
38 demographics. *Br J Pain* 2013;7:56–59.  
39  
40  
41 16 International Association for the Study of Pain. Classification of Chronic Pain, Second  
42  
43 Edition (Revised). Available online: <http://www.iasp->  
44  
45 [pain.org/PublicationsNews/Content.aspx?ItemNumber=1673&navItemNumber=677](http://www.iasp-pain.org/PublicationsNews/Content.aspx?ItemNumber=1673&navItemNumber=677)  
46  
47 (Accessed: June 20, 2016).  
48  
49  
50 17 Kehlet H, Jensen TS, Woolf CJ. Persistent postsurgical pain: risk factors and prevention.  
51  
52 *Lancet* 2006;367:1618–25.  
53  
54  
55 18 Macrae WA. Chronic post-surgical pain: 10 years on. *Br J Anaesth* 2008; 101: 77–86.  
56  
57  
58  
59  
60

- 1  
2  
3 19 Hussain A, Erdek M. Interventional pain management for failed back surgery  
4  
5 syndrome. *Pain Pract* 2014;14:64-78.  
6  
7  
8 20 Chan C-W, Peng P. Failed Back Surgery Syndrome. *Pain Med* 2011;12:577–606.  
9  
10 21 Akobundu E, Ju J, Blatt L, Mullins CD. Cost-of-illness studies: a review of current  
11  
12 methods. *Pharmacoeconomics* 2006;24:869–90.  
13  
14  
15 22 Jefferson T, Demicheli V, Mugford M. Cost-of-illness studies, elementary economic  
16  
17 evaluation in health care. 2nd Ed. London: *BMJ Publishing Group*, 2000:17–29.  
18  
19 23 Adogwa O, Owens R, Karikari I, et al. Revision lumbar surgery in elderly patients with  
20  
21 symptomatic pseudarthrosis, adjacent-segment disease, or same-level recurrent  
22  
23 stenosis. Part 2. A cost-effectiveness analysis: clinical article. *J Neurosurg Spine*  
24  
25 2013;18:147–53.  
26  
27  
28  
29 24 Manca A, Austin PC. Using propensity score methods to analyse individual patient-  
30  
31 level cost-effectiveness data from observational studies. York, UK: University of York  
32  
33 HEDG Working Paper No. 08/20 2008. Available online:  
34  
35 <http://www.york.ac.uk/res/herc/research/hedg/wp.htm> (Accessed: October 16,  
36  
37 2016).  
38  
39  
40 25 Parsons LS. Reducing Bias in a Propensity Score Matched-Pair Sample Using Greedy  
41  
42 Matching Techniques. SAS Users Group International 26 (SUGI26), Paper 214-26 2001.  
43  
44 Available online: <http://www2.sas.com/proceedings/sugi26/p214-26.pdf> (Accessed:  
45  
46 October 16, 2016).  
47  
48  
49  
50 26 Charlson ME, Pompei P, Ales KL, MacKenzie CR. A new method of classifying  
51  
52 prognostic comorbidity in longitudinal studies: Development and validation. *J Chronic*  
53  
54 *Dis* 1987;40:373–83.  
55  
56  
57  
58  
59  
60

- 1  
2  
3 27 National Cancer Institute. SEER Stat Tutorials: Calculating Age-adjusted Rates.  
4  
5 Available online: <https://seer.cancer.gov/seerstat/tutorials/aarates/definition.html>  
6  
7 (Accessed: October 28, 2016).  
8  
9  
10 28 Office for National Statistics (ONS). Population Estimates for UK, England and Wales,  
11  
12 Scotland and Northern Ireland (Mid-2012 file). Available online:  
13  
14 [https://www.ons.gov.uk/peoplepopulationandcommunity/populationandmigration/p](https://www.ons.gov.uk/peoplepopulationandcommunity/populationandmigration/populationestimates/datasets/populationestimatesforukenglandandwalesscotlandandnorthernireland)  
15  
16 [opulationestimates/datasets/populationestimatesforukenglandandwalesscotlandandn](https://www.ons.gov.uk/peoplepopulationandcommunity/populationandmigration/populationestimates/datasets/populationestimatesforukenglandandwalesscotlandandnorthernireland)  
17  
18 [orthernireland](https://www.ons.gov.uk/peoplepopulationandcommunity/populationandmigration/populationestimates/datasets/populationestimatesforukenglandandwalesscotlandandnorthernireland) (Accessed: December 28, 2016).  
19  
20  
21 29 Manca A, Kumar K, Taylor RS, et al. Quality of life, resource consumption and costs of  
22  
23 spinal cord stimulation versus conventional medical management in neuropathic pain  
24  
25 patients with failed back surgery syndrome (PROCESS trial). *Eur J Pain* 2008;12:1047–  
26  
27 1058.  
28  
29  
30  
31 30 Doth AH, Hansson PT, Jensen MP, Taylor RS. The burden of neuropathic pain: a  
32  
33 systematic review and meta-analysis of health utilities. *Pain* 2010;149:338–44.  
34  
35  
36  
37  
38  
39  
40  
41  
42  
43  
44  
45  
46  
47  
48  
49  
50  
51  
52  
53  
54  
55  
56  
57  
58  
59  
60



1  
2  
3  
4  
5  
6  
7  
8  
9  
10  
11  
12  
13  
14  
15  
16  
17  
18  
19  
20  
21  
22  
23  
24  
25  
26  
27  
28  
29  
30  
31  
32  
33  
34  
35  
36  
37  
38  
39  
40  
41  
42  
43  
44  
45  
46  
47  
48  
49  
50  
51  
52  
53  
54  
55  
56  
57  
58  
59  
60

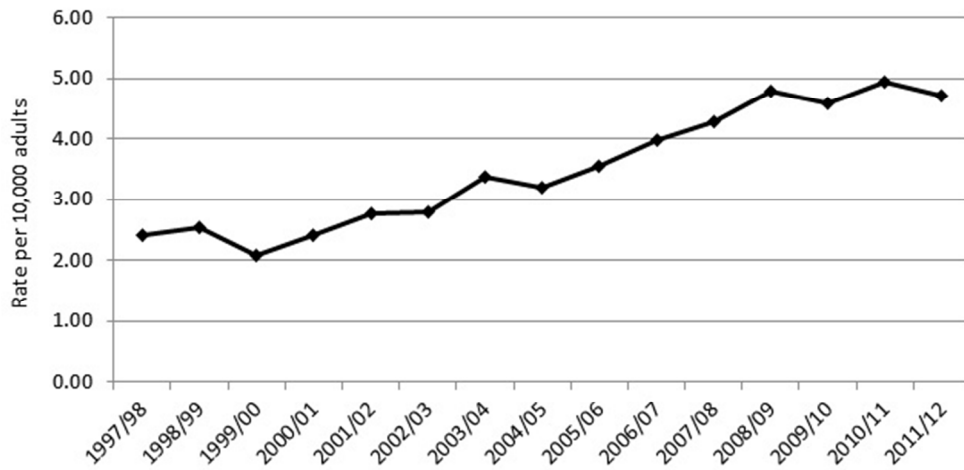

Figure 1: Age- and sex-adjusted incidence of lumbar surgery in linked CPRD-HES, trend in rates per 10,000 adults

172x87mm (96 x 96 DPI)

review only

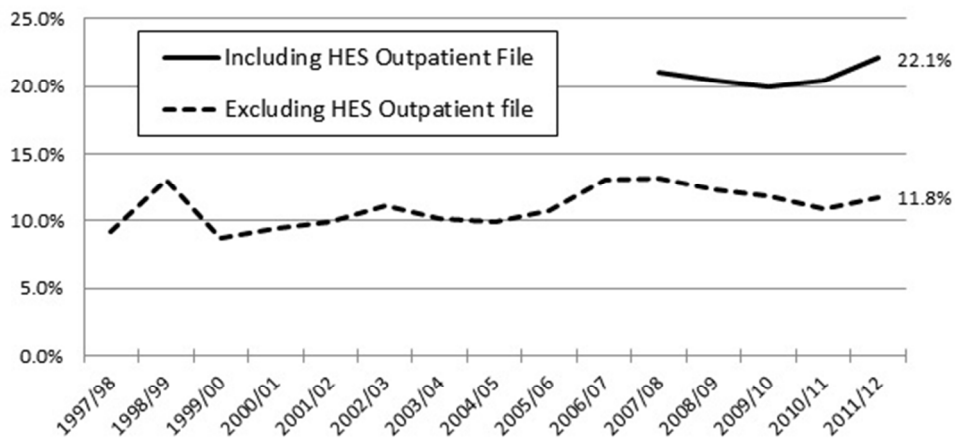

Figure 2: Percentage of patients with persistent postoperative pain (PPP) by year of index lumbar surgery

161x82mm (96 x 96 DPI)

Review only

## Online Supplementary Material

### Description of the databases

*Hospital Episode Statistic*—The Health and Social Care Information Centre (HSCIC) now NHS Digital, is the national body for mandatory data collection from all hospitals in England. Data are captured regardless of payer status (e.g., private or government) or geographic residency of the patient.<sup>1</sup>

*Clinical Practice Research Datalink*—CPRD has records for about 5.5 million currently registered patients and approximately 13 million patients 'ever' registered. These data are collected from approximately 590 general practices and cover 8% of the UK population. The patient population captured in the CPRD has been shown to be broadly representative of the demographic breakdown of the UK population and the quality and completeness of the data have been well-documented.<sup>2-7</sup> These data have been used to answer a wide range of health care quality and resource utilisation questions, including studies of neuropathic pain.<sup>8-11</sup> Linkage to HES is possible for approximately half of patients in CPRD-registered practices.

### Detailed methods for calculating costs of care by encounter type

Primary care: Primary care was grouped into major types of consultation as in previous studies.<sup>12-18</sup> This included clinical consultations, surgery visits, telephone consultations, out of hour visits, administrative visits and other. The category 'other' included encounters as 'repeat issue' or 'third party consultation'. We created separate indicators for each category. Unit costs associated with these 6 categories were assigned to each unique consultation from UK national average estimates produced by the Personal Social Services Research Unit.<sup>19</sup>

Outpatient attendances and procedures: HES outpatient data were available from 2003/04 onwards. However, the outpatient data tables were not accredited as a National Statistic prior to 2008.<sup>1</sup> We distinguished between regular outpatient attendances and outpatient attendances that included an interventional procedure. Unit costs for both types of attendance were taken from the NHS 'Reference Costs' publication<sup>20</sup> and were assigned by treatment specialty and by first versus follow-up visit.

Inpatient care: Stays in the HES inpatient dataset were classified as elective inpatient stays, long (>1 day) non-elective inpatient stays, short non-elective inpatient stays, day cases and regular day or night admissions. To allow costs to vary with clinical complexity of the patient, stays were grouped by NHS Healthcare Resource Groups, using the HRG4+ 2012-13 Reference Costs Grouper software<sup>21</sup> before applying reference costs for each stay category from the national schedule.<sup>20</sup> This was preferred over costing by simple per diem unit costs multiplied by number of inpatient days, which treats all inpatient encounters as equal in intensity of resources used. The HRG grouping approach allows for the inclusion of costs associated with excess bed days. Costs for cases that were not assigned to an HRG (13.4%) were estimated using the average cost by type of service. Total inpatient costs were obtained by aggregating across subcategories of inpatient care.

Accident & Emergency (A&E): Both CPRD and HES datasets contain information about A&E attendances for patients who were referred to the emergency department or who self-referred and were subsequently admitted to the hospital. A&E attendances were costed using the NHS reference costs.<sup>20</sup> and varied depending on whether attendance resulted in an inpatient admission.

Pain medications: We used the same set of prescription drug codes for pain-related analgesia, including opioids, non-steroidal anti-inflammatory drugs or NSAIDs, selected antidepressants with analgesic properties, anticonvulsant/antiepileptic drugs used for pain, and other analgesic therapies. The selected list was informed by a published randomized controlled trial of spinal cord stimulation for treatment of PPP following lumbar surgery.<sup>22,23</sup> We amended the list to add all new analgesic medications marketed in the intervening period. Each medication was costed by strength and formulation/route assigning corresponding unit costs from the British National Formulary<sup>24</sup> and multiplying by the quantity prescribed using the a methodology similar to that employed in the economic analysis of the PROCESS trial.<sup>25</sup>

## References

1. The Health and Social Care Information Centre, NHS. Hospital Episode Statistics: Hospital Outpatient Activity 2011-12 Summary Report. <http://content.digital.nhs.uk/catalogue/PUB09379/hosp-outp-acti-11-12-summ-repo-rep.pdf>. (Accessed: December 28, 2016).
2. Lewis JD, Brensinger C. Agreement between GPRD smoking data: a survey of general practitioners and a population-based survey. *Pharmacoepidemiol Drug Saf* 2004; **13**: 437–441.
3. Wood L, Martinez C. The general practice research database: role in pharmacovigilance. *Drug Saf* 2004; **27**: 871–881.
4. Jick H, Jick SS, Derby LE. Validation of information recorded on general practitioner based computerised data resource in the United Kingdom. *Brit Med J* 1991; **302**: 766–768.
5. Jick H, Terris BZ, Derby LE, Jick SS. Further validation of information recorded on a general practitioner based computerized data resource in the United Kingdom. *Pharmacoepidemiol Drug Safety* 1992; **1**: 347–349.
6. Hollowell J. The General Practice Research Database: quality of morbidity data. *Popul Trends* 1997; **87**: 36–40.
7. García Rodríguez LA, Gutthann SP. Use of the UK General Practice Research Database for pharmacoepidemiology. *Br J Clin Pharmacol* 1998; **45**: 419–425.
8. Hall GC, Carroll D, Parry D, McQuay H. Epidemiology and treatment of neuropathic pain: the UK primary care perspective. *Pain* 2006; **122**: 156–62.
9. Hall GC, Morant SV, Carroll D, Gabriel ZL, McQuay HJ. An observational descriptive study of the epidemiology and treatment of neuropathic pain in a UK general population. *BMC Fam Pract* 2013; **14**: 28.
10. Berger A, Sadosky A, Dukes E, Edelsberg J, Oster G. Clinical characteristics and patterns of healthcare utilisation in patients with painful neuropathic disorders in UK general practice: a retrospective cohort study. *BMC Neurol* 2012; **12**: 8.
11. Hong J, Reed C, Novick D, Happich M. Costs associated with treatment of chronic low back pain: an analysis of the UK General Practice Research Database. *Spine (Phila Pa 1976)* 2013; **38**: 75–82.
12. Reed C, Hong J, Novick D, Lenox-Smith A, Happich M. Health care costs before and after diagnosis of depression in patients with unexplained pain: a retrospective cohort study using the United Kingdom General Practice Research Database. *Clinicoecon Outcomes Res* 2013; **5**: 37–47.
13. Punekar YS, Shukla A, Müllerova H. COPD management costs according to the frequency of COPD exacerbations in UK primary care. *Int J Chron Obstruct Pulmon Dis* 2014; **9**: 65–73.
14. Gulliford MC, Charlton J, Bhattarai N, Charlton C, Rudisill C. Impact and cost-effectiveness of a universal strategy to promote physical activity in primary care: population-based cohort study and Markov model. *Eur J Health Econ* 2014; **15**: 341–51.
15. Holden SE, Jenkins-Jones S, Poole CD, Morgan CL, Coghill D, Currie C. The prevalence and incidence, resource use and financial costs of treating people with attention deficit/hyperactivity disorder (ADHD) in the United Kingdom (1998 to 2010). *Child Adolesc Psychiatry Ment Health* 2013; **7**: 34.
16. Charlton J, Rudisill C, Bhattarai N, Gulliford M. Impact of deprivation on occurrence, outcomes and health care costs of people with multiple morbidity. *J Health Serv Res Policy* 2013; **18**: 215–23.
17. Hong J, Reed C, Novick D, Happich M. Costs Associated With Treatment of Chronic Low Back Pain: An Analysis of the UK General Practice Research Database. *Spine (Phila Pa 1976)* 2013; **38**: 75–82.
18. Brilleman SL, Purdy S, Salisbury C, Windmeijer F, Gravelle H, Hollinghurst S. Implications of comorbidity for primary care costs in the UK: a retrospective observational study. *Br J Gen Pract* 2013; **63**: e274–82.
19. Curtis L. [PSSRU] Unit Costs of Health and Social Care 2013. Canterbury: *Personal Social Services Research Unit, Kent*, 2013.
20. Department of Health. Reference Costs 2012-13. Available online: <https://www.gov.uk/government/publications/nhs-reference-costs-2012-to-2013> (Accessed: April 6, 2014).

- 1  
2  
3  
4  
5  
6  
7  
8  
9  
10  
11  
12  
13  
14  
15  
16  
17  
18  
19  
20  
21  
22  
23  
24  
25  
26  
27  
28  
29  
30  
31  
32  
33  
34  
35  
36  
37  
38  
39  
40  
41  
42  
43  
44  
45  
46  
47  
48  
49  
50  
51  
52  
53  
54  
55  
56  
57  
58  
59  
60
21. National Health Service. Reference Cost Grouper and Documentation. Available online: <http://content.digital.nhs.uk/article/4698/HRG4-201213-Reference-Costs-Grouper-and-Documentation> (Accessed: December 28, 2016).
  22. Kumar K, Taylor RS, Jacques L, et al. Spinal cord stimulation versus conventional medical management for neuropathic pain: a multicentre randomised controlled trial in patients with failed back surgery syndrome. *Pain* 2007; **132**: 179–188.
  23. Kumar K, Taylor RS, Jacques L, et al. The effects of spinal cord stimulation in neuropathic pain are sustained: a 24-month follow-up of the prospective randomised controlled multicenter trial of the effectiveness of spinal cord stimulation. *Neurosurgery* 2008; **63**: 762–770.
  24. British National Formulary (BNF). Available online: [http://www.bnf.org/bnf/org\\_450080.htm](http://www.bnf.org/bnf/org_450080.htm) (Accessed: September 9, 2014).
  25. Manca A, Kumar K, Taylor RS, et al. Quality of life, resource consumption and costs of spinal cord stimulation versus conventional medical management in neuropathic pain patients with failed back surgery syndrome (PROCESS trial). *Eur J Pain* 2008;12:1047–1058.

1  
2  
3  
4  
5  
6  
7  
8  
9  
10  
11  
12  
13  
14  
15

### Unit Costs (2013 British Pounds)

#### Table A. Unit costs of primary care

| Type of consultation                         | Unit cost |
|----------------------------------------------|-----------|
| Clinic                                       | £66       |
| Telephone                                    | £27       |
| Out of hours /night visits/at home/emergency | £114      |
| Administrative                               | £27       |
| Surgery                                      | £45       |
| Other                                        | £66       |

Source: Curtis L. Unit Costs of Health and Social Care 2013. Canterbury, Personal Social Services Research Unit, Kent, 2013.

#### Table B. Unit costs of outpatient attendances

| Treatment specialty code <sup>1</sup> | First or follow up attendance | Unit cost |
|---------------------------------------|-------------------------------|-----------|
| 100                                   | 1                             | 117.83    |
| 100                                   | 2                             | 112.91    |
| 101                                   | 1                             | 106.53    |
| 101                                   | 2                             | 77.71     |
| 102                                   | 1                             | 371.32    |
| 102                                   | 2                             | 338.77    |
| 103                                   | 1                             | 129.79    |
| 103                                   | 2                             | 100.75    |
| 104                                   | 1                             | 123.48    |
| 104                                   | 2                             | 142.34    |
| 105                                   | 1                             | 218.97    |
| 105                                   | 2                             | 153.76    |
| 106                                   | 1                             | 120.58    |
| 106                                   | 2                             | 108.09    |
| 107                                   | 1                             | 236.32    |
| 107                                   | 2                             | 139.81    |
| 108                                   | 1                             | 198.73    |
| 108                                   | 2                             | 198.73    |
| 110                                   | 1                             | 107.04    |
| 110                                   | 2                             | 70.16     |
| 120                                   | 1                             | 96.54     |
| 120                                   | 2                             | 83.51     |
| 130                                   | 1                             | 163.94    |
| 130                                   | 2                             | 75.16     |
| 140                                   | 1                             | 124.67    |
| 140                                   | 2                             | 100.81    |
| 141                                   | 1                             | 170.57    |
| 141                                   | 2                             | 93.64     |
| 142                                   | 1                             | 159.98    |
| 142                                   | 2                             | 95.71     |
| 143                                   | 1                             | 156.19    |
| 143                                   | 2                             | 106.51    |
| 144                                   | 1                             | 111.03    |

|    |     |   |         |
|----|-----|---|---------|
| 1  |     |   |         |
| 2  |     |   |         |
| 3  |     |   |         |
| 4  | 144 | 2 | 117.49  |
| 5  | 145 | 1 | 198.73  |
| 6  | 145 | 2 | 198.73  |
| 7  | 148 | 1 | 198.73  |
| 8  |     |   |         |
| 9  | 150 | 1 | 194.55  |
| 10 | 150 | 2 | 135.68  |
| 11 | 160 | 1 | 99.24   |
| 12 |     |   |         |
| 13 | 160 | 2 | 62.93   |
| 14 | 161 | 1 | 265.93  |
| 15 | 161 | 2 | 211.68  |
| 16 |     |   |         |
| 17 | 170 | 1 | 308.85  |
| 18 | 170 | 2 | 304.11  |
| 19 |     |   |         |
| 20 | 171 | 1 | 4746.99 |
| 21 | 171 | 2 | 154.56  |
| 22 | 172 | 1 | 292.12  |
| 23 | 172 | 2 | 207.78  |
| 24 |     |   |         |
| 25 | 173 | 1 | 251.25  |
| 26 | 173 | 2 | 215.31  |
| 27 | 174 | 1 | 499.54  |
| 28 |     |   |         |
| 29 | 174 | 2 | 334.03  |
| 30 | 180 | 1 | 183.25  |
| 31 | 180 | 2 | 240.18  |
| 32 |     |   |         |
| 33 | 190 | 1 | 75.88   |
| 34 | 190 | 2 | 69.3    |
| 35 | 191 | 1 | 126.7   |
| 36 | 191 | 2 | 98.88   |
| 37 |     |   |         |
| 38 | 192 | 1 | 1564.27 |
| 39 | 192 | 2 | 105.87  |
| 40 |     |   |         |
| 41 | 199 | 1 | 198.73  |
| 42 | 199 | 2 | 198.73  |
| 43 | 211 | 1 | 242.18  |
| 44 | 211 | 2 | 114.72  |
| 45 |     |   |         |
| 46 | 214 | 1 | 142.05  |
| 47 | 214 | 2 | 118.04  |
| 48 | 215 | 1 | 114.82  |
| 49 | 215 | 2 | 101.02  |
| 50 |     |   |         |
| 51 | 216 | 1 | 134.6   |
| 52 | 216 | 2 | 129.33  |
| 53 | 217 | 1 | 378.76  |
| 54 | 217 | 2 | 320.99  |
| 55 | 218 | 2 | 182.7   |
| 56 |     |   |         |
| 57 | 219 | 1 | 154.25  |
| 58 | 219 | 2 | 99.17   |
| 59 |     |   |         |
| 60 | 222 | 1 | 134.98  |
|    | 251 | 1 | 148.27  |

|     |   |        |
|-----|---|--------|
| 251 | 2 | 109.13 |
| 252 | 1 | 808.96 |
| 252 | 2 | 206.14 |
| 253 | 1 | 225.36 |
| 253 | 2 | 202.28 |
| 255 | 1 | 158.35 |
| 255 | 2 | 152.29 |
| 257 | 1 | 122.58 |
| 257 | 2 | 81.29  |
| 258 | 1 | 172.74 |
| 258 | 2 | 123.73 |
| 263 | 1 | 263.09 |
| 263 | 2 | 187.77 |
| 290 | 1 | 198.73 |
| 290 | 2 | 198.73 |
| 291 | 1 | 634.2  |
| 300 | 1 | 146.55 |
| 300 | 2 | 96.03  |
| 301 | 1 | 124.89 |
| 301 | 2 | 101.07 |
| 302 | 1 | 168.86 |
| 302 | 2 | 110.76 |
| 303 | 1 | 165.82 |
| 303 | 2 | 126.05 |
| 304 | 1 | 53.89  |
| 304 | 2 | 50.71  |
| 305 | 1 | 145.79 |
| 305 | 2 | 150.83 |
| 306 | 1 | 190.9  |
| 306 | 2 | 173.07 |
| 307 | 1 | 200.18 |
| 307 | 2 | 94.83  |
| 308 | 1 | 238.45 |
| 308 | 2 | 255.3  |
| 309 | 1 | 525.32 |
| 309 | 2 | 832.36 |
| 310 | 1 | 75.62  |
| 310 | 2 | 67.67  |
| 311 | 1 | 425.08 |
| 311 | 2 | 292.45 |
| 313 | 1 | 137.1  |
| 313 | 2 | 118.89 |
| 314 | 1 | 367.82 |
| 314 | 2 | 130.29 |
| 315 | 1 | 179.78 |



1  
2  
3  
4  
5  
6  
7  
8  
9  
10  
11  
12  
13  
14  
15  
16  
17  
18  
19  
20  
21  
22  
23  
24  
25  
26  
27  
28  
29  
30  
31  
32  
33  
34  
35  
36  
37  
38  
39  
40  
41  
42  
43  
44  
45  
46  
47  
48  
49  
50  
51  
52  
53  
54  
55  
56  
57  
58  
59  
60

|     |   |         |
|-----|---|---------|
| 315 | 2 | 142.69  |
| 316 | 1 | 245.45  |
| 316 | 2 | 138.43  |
| 317 | 1 | 159.7   |
| 317 | 2 | 140.63  |
| 318 | 1 | 198.73  |
| 318 | 2 | 198.73  |
| 320 | 1 | 137.09  |
| 320 | 2 | 114.01  |
| 321 | 1 | 302.22  |
| 321 | 2 | 134.05  |
| 322 | 1 | 88.47   |
| 322 | 2 | 98.32   |
| 323 | 1 | 331.36  |
| 323 | 2 | 266.46  |
| 324 | 1 | 39.54   |
| 324 | 2 | 21.44   |
| 325 | 2 | 117.1   |
| 327 | 1 | 108.22  |
| 327 | 2 | 49.75   |
| 328 | 1 | 170.91  |
| 328 | 2 | 143.91  |
| 329 | 1 | 202.33  |
| 329 | 2 | 155.29  |
| 330 | 1 | 82.13   |
| 330 | 2 | 76.69   |
| 340 | 1 | 206.8   |
| 340 | 2 | 127.15  |
| 341 | 1 | 84.75   |
| 341 | 2 | 90.78   |
| 342 | 1 | 87.71   |
| 342 | 2 | 60.6    |
| 343 | 2 | 228.07  |
| 350 | 1 | 136.93  |
| 350 | 2 | 166.5   |
| 352 | 1 | 277.91  |
| 352 | 2 | 327.81  |
| 360 | 1 | 93.15   |
| 360 | 2 | 67.16   |
| 361 | 1 | 2206.91 |
| 361 | 2 | 138.42  |
| 370 | 1 | 112.27  |
| 370 | 2 | 96.08   |
| 371 | 1 | 122.12  |
| 371 | 2 | 686.83  |

|    |     |   |        |
|----|-----|---|--------|
| 1  |     |   |        |
| 2  |     |   |        |
| 3  |     |   |        |
| 4  | 400 | 1 | 188.02 |
| 5  | 400 | 2 | 131.33 |
| 6  | 401 | 1 | 425.93 |
| 7  | 401 | 2 | 160.19 |
| 8  |     |   |        |
| 9  | 410 | 1 | 155.13 |
| 10 | 410 | 2 | 110.46 |
| 11 | 420 | 1 | 134.13 |
| 12 |     |   |        |
| 13 | 420 | 2 | 135.54 |
| 14 | 421 | 1 | 567.67 |
| 15 | 421 | 2 | 389.2  |
| 16 |     |   |        |
| 17 | 422 | 2 | 191.85 |
| 18 | 430 | 1 | 212.26 |
| 19 | 430 | 2 | 185.11 |
| 20 |     |   |        |
| 21 | 450 | 1 | 195.36 |
| 22 | 450 | 2 | 121.81 |
| 23 |     |   |        |
| 24 | 460 | 1 | 167.95 |
| 25 | 460 | 2 | 166.26 |
| 26 | 499 | 1 | 198.73 |
| 27 | 499 | 2 | 198.73 |
| 28 |     |   |        |
| 29 | 501 | 1 | 110.93 |
| 30 | 501 | 2 | 89.39  |
| 31 | 502 | 1 | 117.31 |
| 32 | 502 | 2 | 93.87  |
| 33 |     |   |        |
| 34 | 503 | 1 | 229.88 |
| 35 | 503 | 2 | 231.8  |
| 36 |     |   |        |
| 37 | 560 | 1 | 75.7   |
| 38 | 560 | 2 | 66.44  |
| 39 | 600 | 1 | 198.73 |
| 40 |     |   |        |
| 41 | 620 | 1 | 198.73 |
| 42 | 650 | 1 | 54.95  |
| 43 | 650 | 2 | 41.56  |
| 44 |     |   |        |
| 45 | 651 | 1 | 84.46  |
| 46 | 651 | 2 | 71.15  |
| 47 | 652 | 1 | 78.15  |
| 48 | 652 | 2 | 51.01  |
| 49 |     |   |        |
| 50 | 653 | 1 | 66.4   |
| 51 | 653 | 2 | 61.9   |
| 52 |     |   |        |
| 53 | 654 | 1 | 73.24  |
| 54 | 654 | 2 | 74.03  |
| 55 | 655 | 1 | 53.07  |
| 56 | 655 | 2 | 54.2   |
| 57 | 656 | 1 | 169.03 |
| 58 |     |   |        |
| 59 | 656 | 2 | 120.2  |
| 60 | 657 | 2 | 198.73 |
|    | 658 | 1 | 198.73 |

1  
2  
3  
4  
5  
6  
7  
8  
9  
10  
11  
12  
13  
14  
15  
16  
17  
18  
19  
20  
21  
22  
23  
24  
25  
26  
27  
28  
29  
30  
31  
32  
33  
34  
35  
36  
37  
38  
39  
40  
41  
42  
43  
44  
45  
46  
47  
48  
49  
50  
51  
52  
53  
54  
55  
56  
57  
58  
59  
60

|     |   |        |
|-----|---|--------|
| 658 | 2 | 198.73 |
| 662 | 1 | 62.65  |
| 662 | 2 | 63.94  |
| 700 | 1 | 198.73 |
| 700 | 2 | 198.73 |
| 710 | 1 | 226.27 |
| 710 | 2 | 129.04 |
| 711 | 1 | 529.63 |
| 711 | 2 | 267.51 |
| 712 | 1 | 198.73 |
| 712 | 2 | 198.73 |
| 713 | 1 | 232.48 |
| 713 | 2 | 456.92 |
| 715 | 1 | 8.92   |
| 715 | 2 | 198.73 |
| 721 | 1 | 198.73 |
| 721 | 2 | 198.73 |
| 722 | 1 | 90.12  |
| 722 | 2 | 136.53 |
| 800 | 1 | 130.99 |
| 800 | 2 | 92.94  |
| 810 | 1 | 198.73 |
| 810 | 2 | 198.73 |
| 811 | 1 | 119.98 |
| 811 | 2 | 403.02 |
| 812 | 1 | 61.26  |
| 812 | 2 | 30.97  |
| 820 | 1 | 198.73 |
| 820 | 2 | 198.73 |
| 822 | 1 | 80.6   |
| 822 | 2 | 73.21  |
| 823 | 1 | 198.73 |
| 823 | 2 | 198.73 |
| 824 | 1 | 198.73 |
| 830 | 1 | 198.73 |
| 830 | 2 | 198.73 |
| 831 | 1 | 198.73 |
| 831 | 2 | 198.73 |
| 840 | 1 | 82.99  |
| 840 | 2 | 70.27  |
| 900 | 1 | 198.73 |
| 900 | 2 | 198.73 |
| 901 | 1 | 198.73 |
| 901 | 2 | 198.73 |
| 902 | 1 | 198.73 |

|     |   |        |
|-----|---|--------|
| 902 | 2 | 198.73 |
| 904 | 1 | 198.73 |
| 904 | 2 | 198.73 |
| 950 | 1 | 198.73 |
| 950 | 2 | 198.73 |
| 960 | 1 | 198.73 |
| 960 | 2 | 198.73 |

Source: Department of Health. Reference Costs 2012-13. Available online: <https://www.gov.uk/government/publications/nhs-reference-costs-2012-to-2013>.

Note(1): For a description for specialty codes see: <https://www.gov.uk/government/collections/nhs-reference-costs>.

For peer review only

Table C. Unit costs of outpatient procedures

| Treatment specialty code <sup>1</sup> | First or follow up attendance | Unit Cost |
|---------------------------------------|-------------------------------|-----------|
| 100                                   | 1                             | \$207.24  |
| 100                                   | 2                             | \$207.24  |
| 101                                   | 1                             | \$149.80  |
| 101                                   | 2                             | \$149.80  |
| 102                                   | 1                             | \$316.02  |
| 102                                   | 2                             | \$316.02  |
| 103                                   | 1                             | \$183.41  |
| 103                                   | 2                             | \$183.41  |
| 104                                   | 1                             | \$173.56  |
| 104                                   | 2                             | \$173.56  |
| 105                                   | 1                             | \$253.18  |
| 105                                   | 2                             | \$253.18  |
| 106                                   | 1                             | \$152.52  |
| 106                                   | 2                             | \$152.52  |
| 107                                   | 1                             | \$168.42  |
| 107                                   | 2                             | \$168.42  |
| 110                                   | 1                             | \$150.11  |
| 110                                   | 2                             | \$150.11  |
| 120                                   | 1                             | \$143.16  |
| 120                                   | 2                             | \$143.16  |
| 130                                   | 1                             | \$132.29  |
| 130                                   | 2                             | \$132.29  |
| 140                                   | 1                             | \$202.87  |
| 140                                   | 2                             | \$202.87  |
| 141                                   | 1                             | \$182.03  |
| 141                                   | 2                             | \$182.03  |
| 143                                   | 1                             | \$146.28  |
| 143                                   | 2                             | \$146.28  |
| 144                                   | 1                             | \$174.41  |
| 144                                   | 2                             | \$174.41  |
| 150                                   | 1                             | \$202.90  |
| 150                                   | 2                             | \$202.90  |
| 160                                   | 1                             | \$138.64  |
| 160                                   | 2                             | \$138.64  |
| 161                                   | 2                             | \$171.23  |
| 170                                   | 1                             | \$198.98  |
| 170                                   | 2                             | \$198.98  |
| 172                                   | 1                             | \$208.25  |
| 172                                   | 2                             | \$208.25  |
| 173                                   | 1                             | \$260.51  |
| 173                                   | 2                             | \$260.51  |
| 174                                   | 2                             | \$468.09  |
| 180                                   | 1                             | \$137.83  |

|     |   |            |
|-----|---|------------|
| 180 | 2 | \$137.83   |
| 190 | 1 | \$100.33   |
| 190 | 2 | \$100.33   |
| 191 | 1 | \$137.73   |
| 191 | 2 | \$137.73   |
| 211 | 2 | \$82.55    |
| 214 | 1 | \$117.67   |
| 214 | 2 | \$117.67   |
| 215 | 1 | \$128.13   |
| 215 | 2 | \$128.13   |
| 216 | 1 | \$163.31   |
| 216 | 2 | \$163.31   |
| 219 | 1 | \$115.64   |
| 252 | 2 | \$387.87   |
| 253 | 2 | \$229.43   |
| 255 | 1 | \$190.98   |
| 255 | 2 | \$190.98   |
| 257 | 1 | \$113.60   |
| 257 | 2 | \$113.60   |
| 258 | 1 | \$139.67   |
| 258 | 2 | \$139.67   |
| 263 | 2 | \$389.56   |
| 300 | 1 | \$201.64   |
| 300 | 2 | \$201.64   |
| 301 | 1 | \$213.32   |
| 301 | 2 | \$213.32   |
| 302 | 1 | \$201.80   |
| 302 | 2 | \$201.80   |
| 303 | 1 | \$191.08   |
| 303 | 2 | \$191.08   |
| 304 | 1 | \$87.00    |
| 304 | 2 | \$87.00    |
| 306 | 1 | \$279.18   |
| 306 | 2 | \$279.18   |
| 307 | 1 | \$184.33   |
| 307 | 2 | \$184.33   |
| 308 | 1 | \$3,808.25 |
| 308 | 2 | \$3,808.25 |
| 310 | 1 | \$199.79   |
| 310 | 2 | \$199.79   |
| 311 | 2 | \$312.55   |
| 313 | 1 | \$129.23   |
| 313 | 2 | \$129.23   |
| 314 | 1 | \$310.94   |
| 314 | 2 | \$310.94   |

|    |     |   |          |
|----|-----|---|----------|
| 1  |     |   |          |
| 2  |     |   |          |
| 3  | 315 | 1 | \$218.81 |
| 4  | 316 | 1 | \$238.93 |
| 5  |     |   |          |
| 6  | 316 | 2 | \$238.93 |
| 7  | 317 | 1 | \$201.90 |
| 8  |     |   |          |
| 9  | 317 | 2 | \$201.90 |
| 10 | 320 | 1 | \$161.38 |
| 11 | 320 | 2 | \$161.38 |
| 12 |     |   |          |
| 13 | 321 | 1 | \$217.81 |
| 14 | 323 | 1 | \$202.51 |
| 15 |     |   |          |
| 16 | 323 | 2 | \$202.51 |
| 17 | 324 | 1 | \$75.75  |
| 18 | 324 | 2 | \$75.75  |
| 19 |     |   |          |
| 20 | 327 | 1 | \$254.11 |
| 21 | 327 | 2 | \$254.11 |
| 22 |     |   |          |
| 23 | 328 | 1 | \$274.25 |
| 24 | 328 | 2 | \$274.25 |
| 25 |     |   |          |
| 26 | 329 | 1 | \$151.74 |
| 27 | 329 | 2 | \$151.74 |
| 28 |     |   |          |
| 29 | 330 | 1 | \$144.10 |
| 30 | 330 | 2 | \$144.10 |
| 31 |     |   |          |
| 32 | 340 | 1 | \$183.78 |
| 33 | 340 | 2 | \$183.78 |
| 34 |     |   |          |
| 35 | 341 | 1 | \$129.66 |
| 36 | 341 | 2 | \$129.66 |
| 37 |     |   |          |
| 38 | 342 | 1 | \$133.03 |
| 39 | 342 | 2 | \$133.03 |
| 40 |     |   |          |
| 41 | 350 | 1 | \$220.19 |
| 42 | 350 | 2 | \$220.19 |
| 43 |     |   |          |
| 44 | 352 | 1 | \$321.96 |
| 45 |     |   |          |
| 46 | 360 | 1 | \$255.02 |
| 47 | 360 | 2 | \$255.02 |
| 48 |     |   |          |
| 49 | 361 | 1 | \$714.11 |
| 50 | 361 | 2 | \$714.11 |
| 51 |     |   |          |
| 52 | 370 | 1 | \$216.20 |
| 53 | 370 | 2 | \$216.20 |
| 54 |     |   |          |
| 55 | 371 | 2 | \$145.89 |
| 56 |     |   |          |
| 57 | 400 | 1 | \$227.56 |
| 58 | 400 | 2 | \$227.56 |
| 59 |     |   |          |
| 60 | 401 | 1 | \$168.22 |
|    | 401 | 2 | \$168.22 |
|    |     |   |          |
|    | 410 | 1 | \$155.89 |
|    | 410 | 2 | \$155.89 |
|    |     |   |          |
|    | 420 | 1 | \$204.63 |
|    | 420 | 2 | \$204.63 |
|    |     |   |          |
|    | 430 | 1 | \$225.07 |

|     |   |          |
|-----|---|----------|
| 430 | 2 | \$225.07 |
| 450 | 1 | \$248.44 |
| 450 | 2 | \$248.44 |
| 460 | 1 | \$135.57 |
| 460 | 2 | \$135.57 |
| 501 | 1 | \$169.90 |
| 501 | 2 | \$169.90 |
| 502 | 1 | \$209.90 |
| 502 | 2 | \$209.90 |
| 503 | 1 | \$171.64 |
| 503 | 2 | \$171.64 |
| 560 | 1 | \$137.23 |
| 560 | 2 | \$137.23 |
| 650 | 1 | \$204.29 |
| 650 | 2 | \$204.29 |
| 651 | 1 | \$390.57 |
| 651 | 2 | \$390.57 |
| 652 | 1 | \$278.72 |
| 652 | 2 | \$278.72 |
| 653 | 1 | \$298.24 |
| 653 | 2 | \$298.24 |
| 654 | 1 | \$535.00 |
| 654 | 2 | \$535.00 |
| 655 | 1 | \$141.38 |
| 655 | 2 | \$141.38 |
| 656 | 1 | \$116.18 |
| 656 | 2 | \$116.18 |
| 662 | 1 | \$101.20 |
| 662 | 2 | \$101.20 |
| 710 | 1 | \$739.15 |
| 710 | 2 | \$739.15 |
| 713 | 1 | \$96.61  |
| 800 | 1 | \$240.80 |
| 800 | 2 | \$240.80 |
| 811 | 1 | \$487.37 |
| 811 | 2 | \$487.37 |
| 812 | 1 | \$176.07 |
| 812 | 2 | \$176.07 |
| 822 | 1 | \$51.08  |
| 822 | 2 | \$51.08  |
| 840 | 1 | \$232.49 |
| 840 | 2 | \$232.49 |

Source: Department of Health. Reference Costs 2012-13. Available online: <https://www.gov.uk/government/publications/nhs-reference-costs-2012-to-2013>.

Note(1): For a description for specialty codes, see: <https://www.gov.uk/government/collections/nhs-reference-costs>.



Table D. Inpatient unit costs by HRG

| FCE_HRG | Unit Cost  |
|---------|------------|
| AA02C   | £13,543.69 |
| AA02D   | £9,098.19  |
| AA02E   | £14,942.99 |
| AA03C   | £10,996.12 |
| AA03D   | £5,129.92  |
| AA04C   | £16,033.24 |
| AA05D   | £8,433.21  |
| AA06C   | £17,411.32 |
| AA06E   | £8,824.69  |
| AA06F   | £8,115.05  |
| AA07C   | £13,079.18 |
| AA07D   | £14,303.06 |
| AA08C   | £6,390.61  |
| AA08D   | £7,680.18  |
| AA09C   | £14,803.38 |
| AA09D   | £7,495.31  |
| AA09E   | £6,550.19  |
| AA10Z   | £7,587.79  |
| AA11Z   | £11,682.94 |
| AA12C   | £3,837.17  |
| AA12D   | £8,361.61  |
| AA12E   | £6,777.98  |
| AA13C   | £9,904.20  |
| AA13D   | £7,445.59  |
| AA14Z   | £4,991.88  |
| AA15C   | £10,826.07 |
| AA15D   | £8,081.22  |
| AA15E   | £7,780.20  |
| AA16Z   | £16,019.03 |
| AA17C   | £13,293.07 |
| AA17D   | £10,625.08 |
| AA18C   | £7,801.23  |
| AA18D   | £5,120.91  |
| AA19D   | £430.38    |
| AA19E   | £4,908.06  |
| AA20C   | £5,435.30  |
| AA20D   | £1,500.60  |
| AA21C   | £3,978.43  |
| AA21D   | £7,093.43  |
| AA21E   | £807.06    |
| AA21F   | £5,543.01  |
| AA21G   | £869.99    |
| AA22C   | £7,390.09  |

|       |           |
|-------|-----------|
| AA22D | £4,932.54 |
| AA22E | £4,022.77 |
| AA22F | £2,315.96 |
| AA22G | £2,302.17 |
| AA23D | £5,085.44 |
| AA23E | £3,408.37 |
| AA23F | £3,091.88 |
| AA23G | £759.46   |
| AA24C | £5,670.86 |
| AA24D | £4,219.40 |
| AA24E | £564.33   |
| AA24F | £2,785.07 |
| AA24G | £2,394.94 |
| AA24H | £619.48   |
| AA25C | £6,997.51 |
| AA25D | £4,458.37 |
| AA25E | £3,208.93 |
| AA25F | £507.84   |
| AA25G | £509.60   |
| AA26C | £6,545.97 |
| AA26D | £4,241.63 |
| AA26E | £2,871.27 |
| AA26F | £496.75   |
| AA26G | £488.50   |
| AA26H | £432.32   |
| AA27Z | £4,322.88 |
| AA28C | £5,714.13 |
| AA28D | £450.69   |
| AA28E | £2,395.84 |
| AA28F | £1,821.09 |
| AA29C | £2,966.01 |
| AA29D | £1,979.55 |
| AA29E | £1,538.58 |
| AA29F | £508.78   |
| AA30C | £3,103.55 |
| AA30D | £2,218.05 |
| AA30E | £2,673.24 |
| AA30F | £2,177.01 |
| AA31C | £1,981.18 |
| AA31D | £2,978.14 |
| AA31E | £1,115.47 |
| AA32Z | £328.94   |
| AA33C | £537.33   |
| AA34C | £1,432.92 |
| AA34D | £1,405.95 |

|    |       |            |
|----|-------|------------|
| 1  |       |            |
| 2  |       |            |
| 3  |       |            |
| 4  | AA35A | £10,431.32 |
| 5  | AA35B | £11,333.42 |
| 6  | AA35C | £5,727.76  |
| 7  | AA35D | £4,024.58  |
| 8  | AA35E | £3,123.14  |
| 9  | AA35F | £2,757.17  |
| 10 | AA37Z | £5,109.45  |
| 11 | AA38Z | £15,151.50 |
| 12 | AB02Z | £904.97    |
| 13 | AB03Z | £827.35    |
| 14 | AB04Z | £704.04    |
| 15 | AB05Z | £570.44    |
| 16 | AB06Z | £619.59    |
| 17 | AB07Z | £11,122.03 |
| 18 | AB08Z | £667.16    |
| 19 | AB09Z | £575.49    |
| 20 | AB10Z | £508.69    |
| 21 | AB11Z | £155.77    |
| 22 | BZ01A | £1,124.52  |
| 23 | BZ01B | £1,109.53  |
| 24 | BZ02A | £1,574.51  |
| 25 | BZ02B | £887.91    |
| 26 | BZ02C | £865.82    |
| 27 | BZ03A | £1,006.92  |
| 28 | BZ03B | £981.66    |
| 29 | BZ04A | £323.46    |
| 30 | BZ04B | £262.68    |
| 31 | BZ05A | £2,445.85  |
| 32 | BZ05B | £3,059.31  |
| 33 | BZ06B | £2,069.08  |
| 34 | BZ06C | £1,088.93  |
| 35 | BZ06D | £970.28    |
| 36 | BZ07B | £918.10    |
| 37 | BZ07C | £5,370.68  |
| 38 | BZ07D | £793.54    |
| 39 | BZ07E | £676.73    |
| 40 | BZ08C | £4,056.93  |
| 41 | BZ08D | £2,845.03  |
| 42 | BZ09C | £1,388.89  |
| 43 | BZ09D | £1,387.95  |
| 44 | BZ10C | £658.41    |
| 45 | BZ10D | £614.48    |
| 46 | BZ11A | £5,105.46  |
| 47 | BZ11B | £2,473.14  |
| 48 | BZ12A | £2,645.63  |
| 49 |       |            |
| 50 |       |            |
| 51 |       |            |
| 52 |       |            |
| 53 |       |            |
| 54 |       |            |
| 55 |       |            |
| 56 |       |            |
| 57 |       |            |
| 58 |       |            |
| 59 |       |            |
| 60 |       |            |

|       |            |
|-------|------------|
| BZ12B | £2,394.69  |
| BZ13A | £1,969.42  |
| BZ13B | £952.30    |
| BZ14A | £1,573.42  |
| BZ15C | £1,335.33  |
| BZ15D | £1,273.00  |
| BZ16A | £1,216.46  |
| BZ17A | £1,592.26  |
| BZ17B | £2,275.41  |
| BZ18A | £1,077.58  |
| BZ18B | £1,139.77  |
| BZ19A | £609.27    |
| BZ19B | £403.55    |
| BZ20A | £2,323.62  |
| BZ20B | £2,270.07  |
| BZ21A | £3,286.41  |
| BZ21B | £2,128.24  |
| BZ21C | £2,089.76  |
| BZ22A | £989.08    |
| BZ22B | £4,276.26  |
| BZ23Z | £1,380.31  |
| BZ24D | £2,960.73  |
| BZ24E | £2,491.24  |
| BZ24F | £396.58    |
| BZ24G | £363.46    |
| CZ01V | £3,310.76  |
| CZ01Y | £1,713.06  |
| CZ02T | £2,074.72  |
| CZ02W | £841.34    |
| CZ02X | £1,726.61  |
| CZ02Y | £620.22    |
| CZ03V | £3,325.97  |
| CZ03Y | £2,926.86  |
| CZ04P | £13,947.08 |
| CZ04Q | £10,048.87 |
| CZ05S | £1,700.15  |
| CZ05T | £1,481.12  |
| CZ05V | £1,607.39  |
| CZ05Y | £1,154.04  |
| CZ07O | £9,572.39  |
| CZ07P | £5,920.08  |
| CZ07Q | £6,080.67  |
| CZ08S | £960.16    |
| CZ08T | £847.88    |
| CZ08V | £772.64    |

|       |            |
|-------|------------|
| CZ08Y | £740.72    |
| CZ09U | £2,774.15  |
| CZ09V | £2,550.10  |
| CZ09Y | £1,040.91  |
| CZ10U | £2,990.26  |
| CZ10V | £2,952.58  |
| CZ10Y | £2,917.72  |
| CZ11Z | £5,538.98  |
| CZ12U | £770.65    |
| CZ12V | £1,494.26  |
| CZ12Y | £627.38    |
| CZ13U | £1,679.89  |
| CZ13V | £1,821.94  |
| CZ13Y | £1,232.52  |
| CZ14U | £2,684.40  |
| CZ14V | £2,324.79  |
| CZ14Y | £2,308.36  |
| CZ15N | £3,253.82  |
| CZ15Q | £3,323.56  |
| CZ16N | £2,121.04  |
| CZ16Q | £2,098.25  |
| CZ17U | £3,631.39  |
| CZ17V | £4,167.67  |
| CZ17Y | £1,076.59  |
| CZ18R | £5,276.95  |
| CZ19Z | £8,743.50  |
| CZ21V | £1,211.53  |
| CZ21Y | £450.63    |
| CZ22W | £2,042.00  |
| CZ22X | £475.68    |
| CZ22Y | £490.02    |
| CZ23W | £2,767.72  |
| CZ23X | £425.39    |
| CZ23Y | £462.17    |
| CZ24O | £5,062.41  |
| CZ24P | £1,839.99  |
| CZ24Q | £1,682.02  |
| CZ25A | £21,234.63 |
| CZ27Z | £2,883.18  |
| CZ28Z | £3,854.04  |
| CZ30Y | £406.03    |
| CZ31Y | £394.31    |
| CZ32Y | £505.20    |
| CZ33Y | £534.06    |
| CZ34Y | £444.10    |

|       |            |
|-------|------------|
| CZ37U | £863.39    |
| CZ37Y | £533.18    |
| CZ38Y | £358.12    |
| CZ39U | £1,005.08  |
| CZ39Y | £818.58    |
| CZ40Y | £681.47    |
| CZ41U | £935.45    |
| CZ41Y | £771.78    |
| CZ42U | £698.00    |
| CZ42Y | £1,720.18  |
| DZ02D | £11,314.15 |
| DZ02E | £8,231.01  |
| DZ02F | £6,988.70  |
| DZ02G | £6,230.44  |
| DZ06Z | £972.56    |
| DZ07A | £630.26    |
| DZ07B | £1,358.95  |
| DZ08Z | £1,220.91  |
| DZ09D | £4,418.94  |
| DZ09E | £3,223.47  |
| DZ09F | £2,491.66  |
| DZ09G | £1,940.38  |
| DZ09H | £464.93    |
| DZ10E | £5,451.32  |
| DZ10F | £608.73    |
| DZ10G | £502.65    |
| DZ11D | £5,484.90  |
| DZ11E | £4,135.26  |
| DZ11F | £4,218.80  |
| DZ11G | £2,315.80  |
| DZ11H | £484.40    |
| DZ11J | £1,374.20  |
| DZ12C | £486.49    |
| DZ12D | £468.78    |
| DZ12E | £2,166.80  |
| DZ12F | £2,073.32  |
| DZ13A | £0.00      |
| DZ13B | £0.00      |
| DZ14C | £4,061.79  |
| DZ14D | £3,188.14  |
| DZ14E | £568.87    |
| DZ15G | £1,596.80  |
| DZ15H | £2,522.95  |
| DZ15J | £1,804.60  |
| DZ15K | £435.23    |

|       |           |
|-------|-----------|
| DZ15L | £413.76   |
| DZ16E | £3,000.27 |
| DZ16F | £514.36   |
| DZ16G | £1,765.57 |
| DZ17E | £4,098.24 |
| DZ17F | £3,183.93 |
| DZ17G | £2,680.99 |
| DZ17H | £502.54   |
| DZ17J | £1,599.15 |
| DZ17K | £586.05   |
| DZ18B | £751.07   |
| DZ18C | £700.20   |
| DZ19D | £446.58   |
| DZ19E | £1,610.16 |
| DZ19F | £431.65   |
| DZ19G | £408.33   |
| DZ20A | £3,002.65 |
| DZ20B | £490.85   |
| DZ20C | £1,664.30 |
| DZ21A | £427.38   |
| DZ21M | £3,374.69 |
| DZ21N | £2,305.75 |
| DZ21P | £2,015.09 |
| DZ21Q | £692.34   |
| DZ21R | £2,993.25 |
| DZ21S | £606.43   |
| DZ21T | £505.73   |
| DZ21U | £1,459.17 |
| DZ22D | £4,803.90 |
| DZ22E | £3,418.05 |
| DZ22F | £2,486.32 |
| DZ22G | £469.13   |
| DZ22H | £1,450.76 |
| DZ22J | £391.85   |
| DZ23E | £3,226.48 |
| DZ23F | £2,174.92 |
| DZ23G | £1,625.01 |
| DZ24D | £5,787.51 |
| DZ24E | £4,282.12 |
| DZ24F | £3,140.59 |
| DZ24G | £578.16   |
| DZ24H | £450.46   |
| DZ25C | £3,095.55 |
| DZ25D | £509.53   |
| DZ25E | £519.49   |

|       |            |
|-------|------------|
| DZ25F | £581.11    |
| DZ26C | £3,795.37  |
| DZ26D | £2,187.89  |
| DZ26E | £1,930.52  |
| DZ26F | £462.29    |
| DZ27G | £3,251.14  |
| DZ27H | £3,887.07  |
| DZ27J | £2,806.15  |
| DZ27K | £1,097.13  |
| DZ27L | £1,620.63  |
| DZ28A | £393.83    |
| DZ28B | £964.57    |
| DZ29C | £5,647.22  |
| DZ29D | £2,140.23  |
| DZ29E | £2,146.28  |
| DZ29F | £1,890.68  |
| DZ30Z | £400.44    |
| DZ37A | £1,211.51  |
| DZ38Z | £338.22    |
| DZ39Z | £0.00      |
| DZ40Z | £582.91    |
| DZ44Z | £738.51    |
| DZ49Z | £114.14    |
| DZ50Z | £675.07    |
| DZ51Z | £19,257.08 |
| DZ53A | £7,648.90  |
| DZ53B | £5,152.55  |
| DZ53C | £4,134.64  |
| DZ53D | £1,011.87  |
| DZ53E | £3,512.05  |
| DZ53F | £3,377.67  |
| DZ54Z | £2,950.88  |
| EA02Z | £46,293.95 |
| EA03A | £1,418.75  |
| EA03B | £5,610.75  |
| EA03C | £1,964.40  |
| EA03D | £1,844.97  |
| EA03E | £2,659.07  |
| EA05A | £7,438.96  |
| EA05B | £5,095.11  |
| EA05C | £2,177.15  |
| EA05D | £1,994.17  |
| EA07B | £4,846.77  |
| EA07C | £5,096.04  |
| EA11B | £1,630.04  |



|    |       |            |
|----|-------|------------|
| 1  |       |            |
| 2  |       |            |
| 3  | EA12B | £14,777.82 |
| 4  | EA12C | £14,528.01 |
| 5  | EA12D | £13,905.13 |
| 6  | EA14A | £14,538.70 |
| 7  | EA14B | £10,487.59 |
| 8  | EA14C | £8,991.28  |
| 9  | EA14D | £8,622.56  |
| 10 | EA16A | £12,763.86 |
| 11 | EA16B | £10,687.50 |
| 12 | EA16C | £9,983.10  |
| 13 | EA16D | £9,172.70  |
| 14 | EA17A | £13,173.21 |
| 15 | EA17B | £11,208.21 |
| 16 | EA17C | £9,696.82  |
| 17 | EA17D | £467.44    |
| 18 | EA19B | £11,722.26 |
| 19 | EA19C | £10,750.08 |
| 20 | EA20A | £18,302.57 |
| 21 | EA20B | £12,150.96 |
| 22 | EA20C | £9,542.71  |
| 23 | EA22Z | £13,738.01 |
| 24 | EA29A | £5,904.41  |
| 25 | EA29B | £5,025.82  |
| 26 | EA29C | £2,820.75  |
| 27 | EA31A | £7,214.31  |
| 28 | EA31B | £2,192.49  |
| 29 | EA31C | £3,237.70  |
| 30 | EA31D | £1,970.40  |
| 31 | EA35A | £5,597.66  |
| 32 | EA35B | £3,896.24  |
| 33 | EA35C | £1,462.02  |
| 34 | EA35D | £1,617.66  |
| 35 | EA36D | £5,695.43  |
| 36 | EA36E | £1,128.29  |
| 37 | EA36F | £2,325.68  |
| 38 | EA36G | £1,038.78  |
| 39 | EA36H | £1,618.88  |
| 40 | EA39A | £6,794.69  |
| 41 | EA39B | £1,992.40  |
| 42 | EA39C | £4,177.28  |
| 43 | EA40Z | £1,085.85  |
| 44 | EA44A | £798.64    |
| 45 | EA44B | £824.66    |
| 46 | EA45Z | £718.96    |
| 47 | EA47Z | £1,353.19  |
| 48 |       |            |
| 49 |       |            |
| 50 |       |            |
| 51 |       |            |
| 52 |       |            |
| 53 |       |            |
| 54 |       |            |
| 55 |       |            |
| 56 |       |            |
| 57 |       |            |
| 58 |       |            |
| 59 |       |            |
| 60 |       |            |

|       |            |
|-------|------------|
| EA48Z | £3,167.03  |
| EA49A | £7,769.81  |
| EA49B | £5,196.60  |
| EA49C | £2,980.40  |
| EA49D | £2,435.71  |
| EA51A | £15,158.11 |
| EA51B | £12,797.00 |
| EA51C | £11,391.21 |
| EA51D | £10,836.08 |
| EA52A | £18,634.08 |
| EA52B | £13,979.79 |
| EA52C | £12,498.92 |
| EA53Z | £15,953.72 |
| EA54A | £3,227.00  |
| EA54B | £3,128.34  |
| EA55B | £1,789.23  |
| EA56A | £18,143.90 |
| EA56B | £16,681.16 |
| EA56C | £14,173.03 |
| EA57A | £6,310.53  |
| EB02B | £3,914.06  |
| EB02C | £805.79    |
| EB03A | £4,509.35  |
| EB03B | £3,676.84  |
| EB03C | £506.59    |
| EB03D | £2,668.50  |
| EB03E | £1,875.30  |
| EB04Z | £463.66    |
| EB05A | £2,874.35  |
| EB05B | £2,184.22  |
| EB05C | £1,528.41  |
| EB06A | £4,298.50  |
| EB06B | £3,799.20  |
| EB06C | £2,859.23  |
| EB06D | £537.84    |
| EB07A | £3,670.91  |
| EB07B | £617.13    |
| EB07C | £1,829.87  |
| EB07D | £501.89    |
| EB07E | £805.06    |
| EB08A | £3,016.30  |
| EB08B | £2,126.28  |
| EB08C | £1,691.46  |
| EB08D | £436.89    |
| EB08E | £405.77    |

|    |       |           |
|----|-------|-----------|
| 1  |       |           |
| 2  |       |           |
| 3  |       |           |
| 4  | EB09A | £3,729.99 |
| 5  | EB09B | £1,837.16 |
| 6  | EB10B | £2,974.30 |
| 7  | EB10C | £2,294.84 |
| 8  | EB10D | £1,886.80 |
| 9  | EB10E | £1,555.21 |
| 10 | EB12A | £1,719.22 |
| 11 | EB12B | £443.72   |
| 12 | EB12C | £1,036.67 |
| 13 | EB13A | £1,422.71 |
| 14 | EB13B | £1,773.75 |
| 15 | EB13C | £464.16   |
| 16 | EB13D | £1,091.92 |
| 17 | EB14A | £4,443.94 |
| 18 | EB14B | £3,312.24 |
| 19 | EB14C | £2,524.94 |
| 20 | EB14D | £1,935.82 |
| 21 | EB14E | £539.63   |
| 22 | EB15B | £2,589.81 |
| 23 | EB15C | £1,941.99 |
| 24 | EC01A | £2,098.70 |
| 25 | EC01B | £2,588.05 |
| 26 | EC02A | £7,984.42 |
| 27 | FZ12L | £9,926.15 |
| 28 | FZ12M | £6,904.52 |
| 29 | FZ12N | £1,531.42 |
| 30 | FZ12P | £4,318.22 |
| 31 | FZ12Q | £3,657.44 |
| 32 | FZ12S | £4,580.50 |
| 33 | FZ13C | £852.44   |
| 34 | FZ13D | £1,870.37 |
| 35 | FZ17E | £4,799.16 |
| 36 | FZ17F | £3,478.78 |
| 37 | FZ17G | £2,815.51 |
| 38 | FZ18E | £1,315.66 |
| 39 | FZ18G | £4,801.34 |
| 40 | FZ18H | £1,475.10 |
| 41 | FZ18J | £2,118.05 |
| 42 | FZ18K | £1,957.43 |
| 43 | FZ19A | £1,765.75 |
| 44 | FZ20F | £5,792.05 |
| 45 | FZ20G | £4,027.75 |
| 46 | FZ20H | £3,110.30 |
| 47 | FZ20J | £2,762.36 |
| 48 | FZ20M | £2,928.55 |
| 49 |       |           |
| 50 |       |           |
| 51 |       |           |
| 52 |       |           |
| 53 |       |           |
| 54 |       |           |
| 55 |       |           |
| 56 |       |           |
| 57 |       |           |
| 58 |       |           |
| 59 |       |           |
| 60 |       |           |

|       |           |
|-------|-----------|
| FZ21C | £1,325.98 |
| FZ21D | £1,890.25 |
| FZ22B | £1,847.29 |
| FZ22C | £3,143.31 |
| FZ22D | £1,907.46 |
| FZ22E | £1,428.31 |
| FZ23A | £1,230.76 |
| FZ23B | £843.25   |
| FZ24G | £622.64   |
| FZ24H | £758.74   |
| FZ24J | £614.50   |
| FZ27E | £5,649.44 |
| FZ27F | £3,727.83 |
| FZ27G | £2,464.19 |
| FZ36G | £7,347.12 |
| FZ36J | £5,089.85 |
| FZ36K | £3,294.86 |
| FZ36L | £2,265.82 |
| FZ36M | £3,430.86 |
| FZ36N | £496.42   |
| FZ36P | £1,897.11 |
| FZ36Q | £440.45   |
| FZ37K | £8,305.66 |
| FZ37L | £4,449.85 |
| FZ37M | £4,244.10 |
| FZ37N | £2,733.89 |
| FZ37P | £476.43   |
| FZ37Q | £1,871.80 |
| FZ37R | £1,550.46 |
| FZ37S | £1,415.93 |
| FZ38G | £4,785.82 |
| FZ38H | £2,929.46 |
| FZ38J | £3,518.38 |
| FZ38K | £2,505.58 |
| FZ38L | £1,801.76 |
| FZ38M | £2,680.46 |
| FZ38N | £503.89   |
| FZ38P | £448.22   |
| FZ42A | £687.67   |
| FZ49D | £5,744.77 |
| FZ49E | £4,239.22 |
| FZ49G | £496.46   |
| FZ49H | £1,848.83 |
| FZ50Z | £769.19   |
| FZ51Z | £485.95   |

|    |       |            |
|----|-------|------------|
| 1  |       |            |
| 2  |       |            |
| 3  |       |            |
| 4  | FZ52Z | £554.48    |
| 5  | FZ53Z | £541.81    |
| 6  | FZ54Z | £411.68    |
| 7  | FZ55Z | £460.93    |
| 8  | FZ56Z | £482.70    |
| 9  | FZ57Z | £1,166.00  |
| 10 | FZ58A | £725.78    |
| 11 | FZ59Z | £345.86    |
| 12 | FZ60Z | £396.91    |
| 13 | FZ61Z | £429.29    |
| 14 | FZ62A | £1,688.57  |
| 15 | FZ63Z | £561.34    |
| 16 | FZ64A | £607.05    |
| 17 | FZ65Z | £654.68    |
| 18 | FZ66C | £13,932.55 |
| 19 | FZ66D | £8,189.81  |
| 20 | FZ66E | £3,134.54  |
| 21 | FZ66F | £5,589.72  |
| 22 | FZ67C | £10,188.49 |
| 23 | FZ67D | £6,012.88  |
| 24 | FZ67E | £4,500.28  |
| 25 | FZ67F | £3,790.60  |
| 26 | FZ69C | £19,184.77 |
| 27 | FZ70Z | £520.41    |
| 28 | FZ71D | £5,958.86  |
| 29 | FZ71F | £897.36    |
| 30 | FZ71G | £1,603.20  |
| 31 | FZ72Z | £2,031.30  |
| 32 | FZ73C | £16,930.33 |
| 33 | FZ73D | £13,373.95 |
| 34 | FZ73E | £13,300.39 |
| 35 | FZ73F | £8,743.87  |
| 36 | FZ74C | £12,875.23 |
| 37 | FZ74D | £9,334.53  |
| 38 | FZ74E | £7,989.55  |
| 39 | FZ74F | £6,883.99  |
| 40 | FZ75C | £8,436.91  |
| 41 | FZ75D | £6,312.07  |
| 42 | FZ75E | £5,575.42  |
| 43 | FZ76C | £6,792.07  |
| 44 | FZ76D | £5,430.19  |
| 45 | FZ77C | £5,412.39  |
| 46 | FZ77D | £4,025.68  |
| 47 | FZ77E | £3,485.39  |
| 48 | FZ78B | £5,587.18  |
| 49 |       |            |
| 50 |       |            |
| 51 |       |            |
| 52 |       |            |
| 53 |       |            |
| 54 |       |            |
| 55 |       |            |
| 56 |       |            |
| 57 |       |            |
| 58 |       |            |
| 59 |       |            |
| 60 |       |            |

|       |            |
|-------|------------|
| FZ79D | £9,964.10  |
| FZ79E | £6,512.34  |
| FZ80C | £18,886.63 |
| FZ80D | £12,819.12 |
| FZ80E | £9,764.70  |
| FZ81C | £11,172.73 |
| FZ81D | £8,308.93  |
| FZ81E | £5,911.18  |
| FZ83D | £4,751.89  |
| FZ83H | £2,682.26  |
| FZ83J | £4,204.90  |
| FZ83K | £3,297.37  |
| FZ84Z | £4,899.45  |
| FZ85Z | £3,810.34  |
| FZ87D | £6,128.11  |
| FZ87E | £4,664.11  |
| FZ87F | £3,847.01  |
| FZ87G | £1,569.17  |
| FZ88A | £700.60    |
| FZ89Z | £2,229.68  |
| FZ90A | £2,202.65  |
| FZ90B | £1,318.05  |
| FZ91A | £9,264.93  |
| FZ91B | £6,032.02  |
| FZ91C | £4,359.18  |
| FZ91D | £2,890.07  |
| FZ91E | £4,870.73  |
| FZ91F | £3,450.95  |
| FZ91G | £2,654.40  |
| FZ91H | £2,056.39  |
| FZ91J | £3,710.11  |
| FZ91K | £2,687.17  |
| FZ91L | £1,972.99  |
| FZ91M | £452.22    |
| FZ92A | £7,070.43  |
| FZ92B | £5,711.23  |
| FZ92C | £3,170.67  |
| FZ92D | £4,713.67  |
| FZ92E | £3,257.60  |
| FZ92F | £2,534.24  |
| FZ92G | £3,828.74  |
| FZ92H | £541.51    |
| FZ92J | £2,303.32  |
| FZ92K | £1,943.25  |
| GA01C | £20,422.28 |

|       |            |
|-------|------------|
| GA03C | £13,933.17 |
| GA03D | £10,037.67 |
| GA03E | £9,194.81  |
| GA04C | £16,609.58 |
| GA04D | £7,471.19  |
| GA05C | £9,309.58  |
| GA05D | £6,948.45  |
| GA06C | £7,033.98  |
| GA06D | £944.47    |
| GA07C | £6,248.27  |
| GA07D | £5,063.49  |
| GA07E | £3,758.99  |
| GA10G | £3,175.90  |
| GA10H | £3,934.88  |
| GA10J | £2,671.09  |
| GA10K | £2,382.68  |
| GA10L | £6,192.54  |
| GA10M | £4,218.23  |
| GA10N | £3,505.81  |
| GA12Z | £30,662.98 |
| GA13A | £3,888.00  |
| GA13B | £2,463.62  |
| GB01C | £9,378.31  |
| GB01D | £6,893.78  |
| GB01E | £1,850.13  |
| GB01F | £4,047.51  |
| GB02D | £7,208.79  |
| GB02E | £5,125.11  |
| GB02F | £1,023.66  |
| GB03C | £5,596.35  |
| GB03D | £859.66    |
| GB03E | £747.26    |
| GB03F | £667.40    |
| GB04D | £560.88    |
| GB05F | £6,752.54  |
| GB05G | £4,733.39  |
| GB05H | £1,695.15  |
| GB06E | £5,439.00  |
| GB06F | £725.33    |
| GB06G | £3,293.42  |
| GB06H | £745.86    |
| GB07Z | £707.32    |
| GB09E | £849.83    |
| GC01C | £5,495.74  |
| GC01D | £3,084.11  |

|       |            |
|-------|------------|
| GC01E | £580.59    |
| GC01F | £1,918.60  |
| GC12C | £5,930.69  |
| GC12D | £3,897.48  |
| GC12E | £2,851.69  |
| GC12F | £2,931.29  |
| GC12G | £3,100.63  |
| GC12H | £2,465.63  |
| GC12J | £1,990.09  |
| GC12K | £1,349.62  |
| GC17A | £7,854.48  |
| GC17B | £5,758.54  |
| GC17C | £4,004.99  |
| GC17D | £4,066.71  |
| GC17E | £3,565.00  |
| GC17F | £2,682.50  |
| GC17G | £3,152.24  |
| GC17H | £2,479.59  |
| GC17J | £1,931.82  |
| GC17K | £490.50    |
| HA11A | £12,489.07 |
| HA11B | £8,705.32  |
| HA11C | £7,543.60  |
| HA12B | £7,961.26  |
| HA12C | £2,365.05  |
| HA13A | £7,980.41  |
| HA13B | £6,388.99  |
| HA13C | £5,386.68  |
| HA14A | £7,615.80  |
| HA14B | £4,830.20  |
| HA14C | £3,698.78  |
| HA21B | £9,571.84  |
| HA21C | £5,722.80  |
| HA22B | £8,629.92  |
| HA22C | £4,906.88  |
| HA23B | £6,921.55  |
| HA23C | £1,683.05  |
| HA24Z | £6,023.58  |
| HA25B | £5,503.83  |
| HA25C | £1,701.15  |
| HA29Z | £903.09    |
| HA31B | £6,156.89  |
| HA31C | £4,013.69  |
| HA32Z | £5,807.90  |
| HA33Z | £4,246.83  |



|    |       |            |
|----|-------|------------|
| 1  |       |            |
| 2  |       |            |
| 3  | HA34Z | £4,051.73  |
| 4  | HA35Z | £1,252.41  |
| 5  | HA39Z | £613.35    |
| 6  | HA51Z | £1,688.69  |
| 7  | HA52Z | £1,774.44  |
| 8  | HA53Z | £1,989.39  |
| 9  | HA54Z | £1,452.04  |
| 10 | HA55Z | £1,546.57  |
| 11 | HA56A | £1,434.10  |
| 12 | HA56B | £2,107.93  |
| 13 | HA61B | £4,889.56  |
| 14 | HA61C | £4,082.81  |
| 15 | HA62Z | £1,927.10  |
| 16 | HA63Z | £1,115.96  |
| 17 | HA69Z | £601.95    |
| 18 | HA71B | £4,708.05  |
| 19 | HA71C | £2,871.56  |
| 20 | HA72Z | £2,527.75  |
| 21 | HA73B | £1,402.82  |
| 22 | HA73C | £948.45    |
| 23 | HA79Z | £1,012.81  |
| 24 | HA81A | £2,515.47  |
| 25 | HA81B | £488.63    |
| 26 | HA81C | £503.30    |
| 27 | HA83A | £1,705.28  |
| 28 | HA83B | £1,116.11  |
| 29 | HA83C | £1,058.05  |
| 30 | HA91Z | £3,861.39  |
| 31 | HA92Z | £3,426.20  |
| 32 | HA93Z | £1,495.98  |
| 33 | HA94Z | £592.67    |
| 34 | HA95Z | £921.30    |
| 35 | HA96Z | £652.79    |
| 36 | HA97Z | £1,971.17  |
| 37 | HA99Z | £4,308.02  |
| 38 | HB11A | £10,230.56 |
| 39 | HB11B | £6,493.36  |
| 40 | HB11C | £6,120.61  |
| 41 | HB12A | £8,217.36  |
| 42 | HB12B | £6,460.06  |
| 43 | HB12C | £5,880.11  |
| 44 | HB13Z | £4,333.10  |
| 45 | HB14B | £4,932.98  |
| 46 | HB14C | £1,262.27  |
| 47 | HB15D | £4,462.35  |
| 48 |       |            |
| 49 |       |            |
| 50 |       |            |
| 51 |       |            |
| 52 |       |            |
| 53 |       |            |
| 54 |       |            |
| 55 |       |            |
| 56 |       |            |
| 57 |       |            |
| 58 |       |            |
| 59 |       |            |
| 60 |       |            |

|    |       |           |
|----|-------|-----------|
| 1  |       |           |
| 2  |       |           |
| 3  |       |           |
| 4  | HB15E | £2,583.33 |
| 5  | HB15G | £2,606.19 |
| 6  | HB16B | £6,806.20 |
| 7  | HB16C | £954.36   |
| 8  | HB19Z | £729.06   |
| 9  | HB21A | £7,765.27 |
| 10 | HB21B | £6,165.26 |
| 11 | HB21C | £5,674.99 |
| 12 | HB22B | £1,477.67 |
| 13 | HB22C | £2,931.03 |
| 14 | HB23B | £3,140.86 |
| 15 | HB23C | £2,470.49 |
| 16 | HB24B | £3,892.33 |
| 17 | HB24C | £2,321.65 |
| 18 | HB25D | £5,498.79 |
| 19 | HB25E | £1,334.71 |
| 20 | HB25F | £1,325.73 |
| 21 | HB29Z | £572.44   |
| 22 | HB31Z | £4,248.35 |
| 23 | HB32A | £3,246.74 |
| 24 | HB32B | £3,917.43 |
| 25 | HB33D | £6,825.00 |
| 26 | HB33E | £1,525.68 |
| 27 | HB33G | £1,535.18 |
| 28 | HB34D | £5,381.61 |
| 29 | HB34E | £1,301.25 |
| 30 | HB35B | £4,704.63 |
| 31 | HB35C | £1,238.17 |
| 32 | HB39Z | £744.65   |
| 33 | HB51Z | £2,799.54 |
| 34 | HB52B | £3,442.59 |
| 35 | HB52C | £2,892.94 |
| 36 | HB53Z | £2,521.75 |
| 37 | HB54B | £1,345.17 |
| 38 | HB54C | £1,383.40 |
| 39 | HB55B | £979.82   |
| 40 | HB55C | £1,028.29 |
| 41 | HB56B | £4,042.02 |
| 42 | HB56C | £1,190.46 |
| 43 | HB59Z | £628.28   |
| 44 | HB61B | £3,730.08 |
| 45 | HB61C | £3,024.80 |
| 46 | HB62B | £2,402.86 |
| 47 | HB62C | £2,217.49 |
| 48 | HB63Z | £2,279.40 |
| 49 |       |           |
| 50 |       |           |
| 51 |       |           |
| 52 |       |           |
| 53 |       |           |
| 54 |       |           |
| 55 |       |           |
| 56 |       |           |
| 57 |       |           |
| 58 |       |           |
| 59 |       |           |
| 60 |       |           |

|    |       |            |
|----|-------|------------|
| 1  |       |            |
| 2  |       |            |
| 3  |       |            |
| 4  | HB69Z | £513.97    |
| 5  | HB71B | £1,683.20  |
| 6  | HB71C | £4,076.43  |
| 7  | HB72Z | £1,496.34  |
| 8  | HB73Z | £2,235.11  |
| 9  | HB79Z | £599.59    |
| 10 | HB91Z | £3,177.84  |
| 11 | HB99Z | £959.72    |
| 12 | HC01A | £14,243.80 |
| 13 | HC01B | £7,662.28  |
| 14 | HC01C | £6,586.51  |
| 15 | HC02D | £14,329.41 |
| 16 | HC02E | £6,437.15  |
| 17 | HC02F | £5,341.63  |
| 18 | HC03D | £4,039.63  |
| 19 | HC03E | £5,624.29  |
| 20 | HC03F | £4,332.23  |
| 21 | HC04D | £7,075.95  |
| 22 | HC04E | £4,405.29  |
| 23 | HC04F | £3,656.35  |
| 24 | HC05D | £9,266.83  |
| 25 | HC05E | £6,461.23  |
| 26 | HC05F | £841.48    |
| 27 | HC06Z | £1,596.98  |
| 28 | HC07A | £10,977.94 |
| 29 | HC07B | £6,973.66  |
| 30 | HC10Z | £402.17    |
| 31 | HC11Z | £863.62    |
| 32 | HC12Z | £636.73    |
| 33 | HC20D | £5,496.59  |
| 34 | HC20E | £3,836.73  |
| 35 | HC20F | £2,994.39  |
| 36 | HC20G | £2,361.26  |
| 37 | HC21D | £15,961.04 |
| 38 | HC21E | £4,759.89  |
| 39 | HC26D | £760.81    |
| 40 | HC26E | £695.56    |
| 41 | HC26F | £683.46    |
| 42 | HC27D | £4,996.22  |
| 43 | HC27E | £3,245.03  |
| 44 | HC27F | £2,369.57  |
| 45 | HC27G | £505.17    |
| 46 | HC28D | £10,324.42 |
| 47 | HC28E | £7,109.83  |
| 48 | HC28F | £4,011.42  |
| 49 |       |            |
| 50 |       |            |
| 51 |       |            |
| 52 |       |            |
| 53 |       |            |
| 54 |       |            |
| 55 |       |            |
| 56 |       |            |
| 57 |       |            |
| 58 |       |            |
| 59 |       |            |
| 60 |       |            |

|    |       |            |
|----|-------|------------|
| 1  |       |            |
| 2  |       |            |
| 3  |       |            |
| 4  | HC28G | £3,421.42  |
| 5  | HC29A | £441.63    |
| 6  | HC29B | £420.45    |
| 7  | HC30D | £5,990.65  |
| 8  | HC30E | £3,016.77  |
| 9  | HC31D | £7,351.68  |
| 10 | HC31E | £4,906.91  |
| 11 | HC31F | £4,743.18  |
| 12 | HC31G | £646.72    |
| 13 | HC32D | £533.04    |
| 14 | HC32E | £478.69    |
| 15 | HC32F | £462.15    |
| 16 | HC40A | £21,410.92 |
| 17 | HC40B | £15,985.84 |
| 18 | HC41A | £8,891.94  |
| 19 | HC41B | £7,031.53  |
| 20 | HC42Z | £10,543.24 |
| 21 | HC43Z | £9,261.06  |
| 22 | HD21D | £3,417.26  |
| 23 | HD21E | £2,589.77  |
| 24 | HD21F | £1,862.62  |
| 25 | HD21G | £406.97    |
| 26 | HD21H | £1,522.69  |
| 27 | HD23D | £6,584.68  |
| 28 | HD23E | £544.27    |
| 29 | HD23F | £413.08    |
| 30 | HD23G | £431.89    |
| 31 | HD23H | £424.66    |
| 32 | HD23J | £432.54    |
| 33 | HD24D | £4,665.17  |
| 34 | HD24E | £3,569.75  |
| 35 | HD24F | £2,453.16  |
| 36 | HD24G | £2,226.71  |
| 37 | HD24H | £403.46    |
| 38 | HD25D | £643.63    |
| 39 | HD25E | £707.35    |
| 40 | HD25F | £3,725.69  |
| 41 | HD25G | £3,231.34  |
| 42 | HD25H | £2,710.61  |
| 43 | HD26D | £521.16    |
| 44 | HD26E | £2,403.23  |
| 45 | HD26F | £458.48    |
| 46 | HD26G | £430.37    |
| 47 | HD39E | £4,225.92  |
| 48 | HD39F | £3,041.80  |
| 49 |       |            |
| 50 |       |            |
| 51 |       |            |
| 52 |       |            |
| 53 |       |            |
| 54 |       |            |
| 55 |       |            |
| 56 |       |            |
| 57 |       |            |
| 58 |       |            |
| 59 |       |            |
| 60 |       |            |

|    |       |            |
|----|-------|------------|
| 1  |       |            |
| 2  |       |            |
| 3  | HD39G | £2,492.79  |
| 4  | HD39H | £1,921.15  |
| 5  | HD40D | £8,531.13  |
| 6  | HD40E | £4,343.94  |
| 7  | HD40F | £3,539.32  |
| 8  | HD40G | £2,744.69  |
| 9  | HD40H | £377.65    |
| 10 | HR07A | £5,970.80  |
| 11 | HR07B | £7,470.47  |
| 12 | HR07C | £8,876.42  |
| 13 | HR08A | £5,420.64  |
| 14 | HR08B | £6,744.73  |
| 15 | HR08C | £10,303.59 |
| 16 | HR09A | £5,588.98  |
| 17 | HR09B | £7,825.23  |
| 18 | HR09C | £15,557.92 |
| 19 | JA12D | £5,353.82  |
| 20 | JA12E | £3,576.57  |
| 21 | JA12F | £2,672.39  |
| 22 | JA12G | £4,076.51  |
| 23 | JA12H | £2,304.75  |
| 24 | JA12J | £1,283.25  |
| 25 | JA12K | £497.76    |
| 26 | JA12L | £1,294.77  |
| 27 | JA13A | £2,487.08  |
| 28 | JA13B | £1,797.83  |
| 29 | JA13C | £407.72    |
| 30 | JA14Z | £8,984.75  |
| 31 | JA18Z | £654.24    |
| 32 | JA19Z | £609.14    |
| 33 | JA20D | £3,599.49  |
| 34 | JA20E | £3,125.52  |
| 35 | JA20F | £2,900.49  |
| 36 | JA21A | £3,884.88  |
| 37 | JA21B | £3,423.41  |
| 38 | JA24D | £1,365.46  |
| 39 | JA24E | £2,480.14  |
| 40 | JA24F | £1,288.46  |
| 41 | JA25Z | £2,262.30  |
| 42 | JA26A | £4,397.62  |
| 43 | JA26B | £3,674.96  |
| 44 | JA26C | £3,476.29  |
| 45 | JA27Z | £6,748.28  |
| 46 | JA28Z | £11,072.09 |
| 47 | JA30Z | £5,488.31  |
| 48 |       |            |
| 49 |       |            |
| 50 |       |            |
| 51 |       |            |
| 52 |       |            |
| 53 |       |            |
| 54 |       |            |
| 55 |       |            |
| 56 |       |            |
| 57 |       |            |
| 58 |       |            |
| 59 |       |            |
| 60 |       |            |

|    |       |            |
|----|-------|------------|
| 1  |       |            |
| 2  |       |            |
| 3  |       |            |
| 4  | JB30C | £818.93    |
| 5  | JB31A | £34,548.56 |
| 6  | JB32A | £4,925.04  |
| 7  | JB32B | £4,242.81  |
| 8  | JB32C | £2,638.62  |
| 9  | JB33A | £10,761.97 |
| 10 | JB33B | £3,111.75  |
| 11 | JB33C | £493.06    |
| 12 | JC40Z | £10,970.68 |
| 13 | JC41Z | £5,326.68  |
| 14 | JC42A | £1,029.92  |
| 15 | JC42B | £986.16    |
| 16 | JC43A | £623.84    |
| 17 | JC43B | £859.15    |
| 18 | JC47A | £48.38     |
| 19 | JD07A | £7,618.31  |
| 20 | JD07B | £5,453.27  |
| 21 | JD07C | £3,609.36  |
| 22 | JD07D | £2,491.79  |
| 23 | JD07E | £506.50    |
| 24 | JD07F | £593.60    |
| 25 | JD07G | £3,064.28  |
| 26 | JD07H | £2,335.07  |
| 27 | JD07J | £1,789.28  |
| 28 | JD07K | £1,371.42  |
| 29 | KA03C | £2,902.57  |
| 30 | KA03D | £2,522.20  |
| 31 | KA04B | £5,111.70  |
| 32 | KA05C | £576.73    |
| 33 | KA05D | £515.58    |
| 34 | KA06C | £4,158.03  |
| 35 | KA06D | £1,938.75  |
| 36 | KA06E | £1,664.03  |
| 37 | KA07A | £3,096.36  |
| 38 | KA07B | £1,826.34  |
| 39 | KA07C | £1,408.13  |
| 40 | KA08A | £748.87    |
| 41 | KA08B | £487.48    |
| 42 | KA08C | £425.15    |
| 43 | KA09C | £5,743.92  |
| 44 | KA09D | £4,006.02  |
| 45 | KA09E | £3,230.69  |
| 46 | KB01C | £485.26    |
| 47 | KB01D | £426.23    |
| 48 | KB01E | £554.32    |
| 49 |       |            |
| 50 |       |            |
| 51 |       |            |
| 52 |       |            |
| 53 |       |            |
| 54 |       |            |
| 55 |       |            |
| 56 |       |            |
| 57 |       |            |
| 58 |       |            |
| 59 |       |            |
| 60 |       |            |

|    |       |            |
|----|-------|------------|
| 1  |       |            |
| 2  |       |            |
| 3  |       |            |
| 4  | KB01F | £391.14    |
| 5  | KB02G | £2,822.99  |
| 6  | KB02H | £463.36    |
| 7  | KB02J | £448.44    |
| 8  | KB02K | £415.98    |
| 9  |       |            |
| 10 | KB03C | £3,870.81  |
| 11 | KB03D | £2,549.46  |
| 12 | KB03E | £2,138.25  |
| 13 | KB04Z | £1,958.24  |
| 14 | KC04A | £507.03    |
| 15 | KC04B | £267.75    |
| 16 |       |            |
| 17 | KC05G | £4,544.43  |
| 18 | KC05H | £4,024.18  |
| 19 | KC05J | £3,070.54  |
| 20 | KC05K | £2,244.14  |
| 21 | KC05L | £462.93    |
| 22 | KC05M | £1,062.38  |
| 23 | KC05N | £1,305.90  |
| 24 | LA02A | £20,798.61 |
| 25 | LA03A | £18,205.21 |
| 26 | LA04J | £6,115.86  |
| 27 | LA04K | £4,428.48  |
| 28 | LA04L | £3,268.28  |
| 29 | LA04M | £2,125.60  |
| 30 | LA04N | £4,874.17  |
| 31 | LA04P | £3,495.46  |
| 32 | LA04Q | £2,451.10  |
| 33 | LA04R | £476.80    |
| 34 | LA04S | £447.02    |
| 35 | LA05Z | £785.01    |
| 36 | LA07H | £5,969.44  |
| 37 | LA07J | £4,527.07  |
| 38 | LA07K | £3,248.23  |
| 39 | LA07L | £3,936.57  |
| 40 | LA07M | £548.46    |
| 41 | LA07N | £2,227.42  |
| 42 | LA07P | £490.22    |
| 43 | LA08H | £3,805.42  |
| 44 | LA08J | £2,949.90  |
| 45 | LA08K | £3,920.89  |
| 46 | LA08L | £3,231.83  |
| 47 | LA08M | £342.15    |
| 48 | LA08N | £300.99    |
| 49 | LA08P | £2,137.26  |
| 50 | LA09K | £3,184.56  |
| 51 |       |            |
| 52 |       |            |
| 53 |       |            |
| 54 |       |            |
| 55 |       |            |
| 56 |       |            |
| 57 |       |            |
| 58 |       |            |
| 59 |       |            |
| 60 |       |            |

|    |       |           |
|----|-------|-----------|
| 1  |       |           |
| 2  |       |           |
| 3  |       |           |
| 4  | LA09L | £2,469.46 |
| 5  | LA09N | £2,843.00 |
| 6  | LA09P | £1,797.58 |
| 7  | LA09Q | £1,366.99 |
| 8  |       |           |
| 9  | LA97A | £0.00     |
| 10 | LB05E | £3,817.98 |
| 11 | LB05F | £3,399.78 |
| 12 |       |           |
| 13 | LB05G | £2,487.93 |
| 14 | LB06J | £4,239.80 |
| 15 | LB06K | £3,367.81 |
| 16 |       |           |
| 17 | LB06L | £2,273.24 |
| 18 | LB06M | £2,164.00 |
| 19 | LB06N | £4,934.12 |
| 20 | LB06P | £3,725.97 |
| 21 |       |           |
| 22 | LB06Q | £2,341.83 |
| 23 | LB06R | £445.60   |
| 24 |       |           |
| 25 | LB06S | £1,243.65 |
| 26 |       |           |
| 27 | LB09D | £713.76   |
| 28 | LB10C | £6,918.01 |
| 29 | LB10D | £5,302.30 |
| 30 | LB12Z | £3,377.65 |
| 31 | LB13C | £4,286.46 |
| 32 | LB13D | £2,654.36 |
| 33 | LB13E | £1,062.30 |
| 34 | LB13F | £1,815.17 |
| 35 |       |           |
| 36 | LB14Z | £769.18   |
| 37 |       |           |
| 38 | LB15E | £487.60   |
| 39 | LB16D | £2,930.21 |
| 40 | LB16E | £2,186.91 |
| 41 | LB16F | £2,130.46 |
| 42 | LB16G | £2,546.28 |
| 43 | LB16H | £1,804.13 |
| 44 | LB16J | £1,514.76 |
| 45 | LB16K | £396.56   |
| 46 | LB17Z | £288.52   |
| 47 | LB18Z | £385.29   |
| 48 |       |           |
| 49 | LB19C | £3,153.41 |
| 50 | LB19D | £2,028.35 |
| 51 | LB19E | £2,645.85 |
| 52 | LB19F | £347.75   |
| 53 | LB19G | £796.40   |
| 54 | LB20C | £2,565.35 |
| 55 | LB20D | £1,601.59 |
| 56 | LB20E | £2,201.68 |
| 57 | LB20F | £450.12   |
| 58 |       |           |
| 59 |       |           |
| 60 |       |           |



|    |       |            |
|----|-------|------------|
| 1  |       |            |
| 2  |       |            |
| 3  | LB20G | £1,127.74  |
| 4  | LB21A | £5,469.42  |
| 5  | LB21B | £5,236.04  |
| 6  | LB22Z | £5,594.58  |
| 7  | LB25D | £3,676.54  |
| 8  | LB25E | £2,644.44  |
| 9  | LB25F | £2,393.78  |
| 10 | LB26A | £1,958.34  |
| 11 | LB26B | £1,670.04  |
| 12 | LB27Z | £586.81    |
| 13 | LB28C | £2,160.84  |
| 14 | LB28D | £1,401.77  |
| 15 | LB28E | £2,657.64  |
| 16 | LB28F | £458.42    |
| 17 | LB28G | £1,305.66  |
| 18 | LB29A | £3,861.40  |
| 19 | LB33Z | £773.42    |
| 20 | LB35C | £3,050.63  |
| 21 | LB35D | £2,607.77  |
| 22 | LB35E | £564.74    |
| 23 | LB35F | £1,686.33  |
| 24 | LB35G | £1,455.92  |
| 25 | LB35H | £1,279.58  |
| 26 | LB36Z | £506.12    |
| 27 | LB37C | £2,070.92  |
| 28 | LB37D | £422.65    |
| 29 | LB37E | £385.23    |
| 30 | LB38D | £2,104.76  |
| 31 | LB38E | £1,609.14  |
| 32 | LB38F | £472.22    |
| 33 | LB38G | £1,665.80  |
| 34 | LB38H | £324.41    |
| 35 | LB39C | £10,837.55 |
| 36 | LB39D | £9,429.91  |
| 37 | LB40C | £2,743.54  |
| 38 | LB40D | £1,964.20  |
| 39 | LB40F | £1,450.39  |
| 40 | LB40G | £465.77    |
| 41 | LB42A | £428.18    |
| 42 | LB43Z | £359.26    |
| 43 | LB46Z | £6,952.52  |
| 44 | LB47Z | £5,059.08  |
| 45 | LB48Z | £2,479.57  |
| 46 | LB49Z | £2,454.11  |
| 47 | LB50Z | £4,903.03  |
| 48 |       |            |
| 49 |       |            |
| 50 |       |            |
| 51 |       |            |
| 52 |       |            |
| 53 |       |            |
| 54 |       |            |
| 55 |       |            |
| 56 |       |            |
| 57 |       |            |
| 58 |       |            |
| 59 |       |            |
| 60 |       |            |

|    |       |            |
|----|-------|------------|
| 1  |       |            |
| 2  |       |            |
| 3  |       |            |
| 4  | LB51A | £1,897.63  |
| 5  | LB51B | £1,534.97  |
| 6  | LB52A | £6,607.34  |
| 7  | LB52B | £2,242.84  |
| 8  |       |            |
| 9  | LB53C | £1,467.66  |
| 10 | LB53D | £1,763.33  |
| 11 | LB54A | £1,116.61  |
| 12 |       |            |
| 13 | LB54C | £1,468.27  |
| 14 | LB55A | £683.35    |
| 15 | LB55B | £943.14    |
| 16 |       |            |
| 17 | LB56A | £1,026.29  |
| 18 | LB56C | £1,543.16  |
| 19 | LB57C | £2,176.85  |
| 20 |       |            |
| 21 | LB57D | £476.21    |
| 22 | LB58C | £2,190.53  |
| 23 |       |            |
| 24 | LB58D | £413.21    |
| 25 | LB59Z | £3,684.69  |
| 26 | LB60C | £9,573.79  |
| 27 | LB60E | £6,065.43  |
| 28 |       |            |
| 29 | LB60F | £5,210.39  |
| 30 | LB61C | £8,463.93  |
| 31 | LB61D | £6,064.71  |
| 32 | LB61E | £4,998.45  |
| 33 | LB61F | £4,914.89  |
| 34 |       |            |
| 35 | LB61G | £4,796.58  |
| 36 | LB62C | £6,486.22  |
| 37 |       |            |
| 38 | LB62D | £5,326.93  |
| 39 | LB64C | £6,098.13  |
| 40 |       |            |
| 41 | LB64D | £2,996.65  |
| 42 | LB64E | £2,489.19  |
| 43 | LB65C | £3,374.79  |
| 44 | LB65D | £2,531.37  |
| 45 | LB65E | £1,425.40  |
| 46 |       |            |
| 47 | LB67C | £13,522.65 |
| 48 | LB67D | £8,966.55  |
| 49 |       |            |
| 50 | LB68A | £4,166.50  |
| 51 | LB68B | £2,623.50  |
| 52 |       |            |
| 53 | LB69Z | £7,763.84  |
| 54 | LB70C | £3,045.32  |
| 55 | LB70D | £2,615.13  |
| 56 |       |            |
| 57 | LB72A | £409.36    |
| 58 | LB72B | £801.53    |
| 59 | LB74Z | £3,982.15  |
| 60 | MA01Z | £5,467.73  |
|    | MA02B | £4,209.72  |

|    |       |           |
|----|-------|-----------|
| 1  |       |           |
| 2  |       |           |
| 3  |       |           |
| 4  | MA02C | £3,676.11 |
| 5  | MA03C | £3,107.58 |
| 6  | MA03D | £2,532.15 |
| 7  | MA04C | £2,501.14 |
| 8  | MA04D | £2,087.46 |
| 9  | MA06A | £4,871.05 |
| 10 | MA06B | £3,783.22 |
| 11 | MA06C | £3,362.98 |
| 12 | MA07E | £5,336.99 |
| 13 | MA07F | £3,944.64 |
| 14 | MA07G | £3,255.48 |
| 15 | MA08A | £3,209.11 |
| 16 | MA08B | £2,888.08 |
| 17 | MA09Z | £1,542.47 |
| 18 | MA10Z | £1,180.92 |
| 19 | MA11Z | £2,840.05 |
| 20 | MA12Z | £1,112.56 |
| 21 | MA17C | £1,150.77 |
| 22 | MA17D | £1,449.77 |
| 23 | MA18C | £729.37   |
| 24 | MA18D | £991.08   |
| 25 | MA19A | £724.06   |
| 26 | MA19B | £735.02   |
| 27 | MA20Z | £1,227.49 |
| 28 | MA22Z | £1,375.81 |
| 29 | MA23Z | £910.72   |
| 30 | MA24Z | £1,009.95 |
| 31 | MA25Z | £817.73   |
| 32 | MA26A | £6,851.03 |
| 33 | MA26B | £5,026.02 |
| 34 | MA26C | £4,594.76 |
| 35 | MA27Z | £1,030.43 |
| 36 | MA28Z | £3,668.44 |
| 37 | MA29Z | £1,544.79 |
| 38 | MA30Z | £1,350.66 |
| 39 | MA31Z | £775.03   |
| 40 | MA32Z | £846.25   |
| 41 | MA33Z | £885.70   |
| 42 | MA34Z | £1,166.77 |
| 43 | MA35Z | £631.48   |
| 44 | MA36Z | £433.61   |
| 45 | MA38Z | £503.08   |
| 46 | MA39Z | £395.81   |
| 47 | MA40Z | £699.03   |
| 48 | MB05C | £6,662.48 |
| 49 |       |           |
| 50 |       |           |
| 51 |       |           |
| 52 |       |           |
| 53 |       |           |
| 54 |       |           |
| 55 |       |           |
| 56 |       |           |
| 57 |       |           |
| 58 |       |           |
| 59 |       |           |
| 60 |       |           |

|    |       |           |
|----|-------|-----------|
| 1  |       |           |
| 2  |       |           |
| 3  |       |           |
| 4  | MB05D | £5,287.21 |
| 5  | MB05E | £3,537.51 |
| 6  | MB05F | £2,303.05 |
| 7  | MB05G |           |
| 8  | MB05H | £5,387.16 |
| 9  | MB05J | £3,710.38 |
| 10 | MB05K | £3,141.07 |
| 11 | MB05L | £1,569.16 |
| 12 | MB05L | £1,557.71 |
| 13 | MB08A | £1,732.75 |
| 14 | MB08B | £466.09   |
| 15 | MB09B | £2,566.40 |
| 16 | MB09C | £2,428.72 |
| 17 | MB09D | £2,206.44 |
| 18 | MB09E | £542.97   |
| 19 | MB09F | £514.50   |
| 20 | MC09Z | £502.28   |
| 21 | MC11Z | £903.32   |
| 22 | MC12Z | £1,079.44 |
| 23 | NZ10Z | £741.28   |
| 24 | NZ16Z | £514.84   |
| 25 | NZ17A | £1,742.01 |
| 26 | NZ17B | £0.00     |
| 27 | NZ18A | £2,327.73 |
| 28 | NZ18B | £643.79   |
| 29 | NZ19A | £632.65   |
| 30 | NZ19B | £520.77   |
| 31 | NZ20A | £569.62   |
| 32 | NZ20B | £513.72   |
| 33 | NZ21Z | £0.00     |
| 34 | NZ22Z | £231.50   |
| 35 | NZ23Z | £649.69   |
| 36 | NZ24B | £2,146.26 |
| 37 | NZ25Z | £1,766.53 |
| 38 | NZ26A | £670.03   |
| 39 | NZ26B | £2,065.46 |
| 40 | NZ27Z | £2,284.30 |
| 41 | NZ30A | £2,262.55 |
| 42 | NZ30B | £1,147.73 |
| 43 | NZ30C | £1,092.15 |
| 44 | NZ31A | £2,685.65 |
| 45 | NZ31B | £2,425.97 |
| 46 | NZ31C | £2,208.06 |
| 47 | NZ32A | £3,075.14 |
| 48 | NZ32B | £2,640.80 |
| 49 | NZ32C | £0.00     |
| 50 |       |           |
| 51 |       |           |
| 52 |       |           |
| 53 |       |           |
| 54 |       |           |
| 55 |       |           |
| 56 |       |           |
| 57 |       |           |
| 58 |       |           |
| 59 |       |           |
| 60 |       |           |

|       |           |
|-------|-----------|
| NZ33A | £2,983.78 |
| NZ33B | £2,735.70 |
| NZ33C | £2,512.40 |
| NZ34B | £2,881.51 |
| NZ34C | £2,825.40 |
| NZ40A | £1,360.86 |
| NZ40B | £2,488.36 |
| NZ40C | £2,253.11 |
| NZ41A | £3,165.62 |
| NZ41B | £1,538.37 |
| NZ41C | £2,532.36 |
| NZ42A | £3,536.05 |
| NZ42B | £3,001.46 |
| NZ42C | £2,719.67 |
| NZ43B | £3,130.63 |
| NZ43C | £2,929.01 |
| NZ44A | £3,855.94 |
| NZ44B | £1,883.85 |
| NZ44C | £3,175.10 |
| NZ50A | £4,044.71 |
| NZ50B | £3,127.84 |
| NZ50C | £1,939.33 |
| NZ51A | £5,164.17 |
| NZ51B | £4,126.61 |
| NZ51C | £3,441.76 |
| PA01A | £3,913.13 |
| PA01B | £830.64   |
| PA02A | £608.50   |
| PA03B | £514.21   |
| PA04A | £572.08   |
| PA04B | £490.55   |
| PA07B | £1,523.56 |
| PA08A | £2,350.40 |
| PA08B | £692.65   |
| PA11Z | £467.62   |
| PA12Z | £1,410.11 |
| PA14C | £3,250.84 |
| PA14D | £679.77   |
| PA14E | £490.45   |
| PA16B | £1,803.64 |
| PA17B | £1,724.24 |
| PA19A | £535.54   |
| PA21B | £1,381.30 |
| PA22Z | £1,479.29 |
| PA23A | £3,399.55 |

|    |       |            |
|----|-------|------------|
| 1  |       |            |
| 2  |       |            |
| 3  |       |            |
| 4  | PA23B | £2,303.84  |
| 5  | PA24Z | £1,899.46  |
| 6  | PA25A | £4,433.02  |
| 7  | PA26A | £3,008.65  |
| 8  | PA26B | £1,542.16  |
| 9  | PA27Z | £2,968.28  |
| 10 | PA28A | £2,693.99  |
| 11 | PA28B | £488.44    |
| 12 | PA29Z | £505.45    |
| 13 | PA30B | £651.62    |
| 14 | PA31Z | £4,543.05  |
| 15 | PA32B | £576.32    |
| 16 | PA34A | £2,680.24  |
| 17 | PA34B | £532.44    |
| 18 | PA35B | £1,857.51  |
| 19 | PA36Z | £2,269.61  |
| 20 | PA48B | £2,176.65  |
| 21 | PA50Z | £480.04    |
| 22 | PA52C | £12,554.75 |
| 23 | PA56B | £1,487.55  |
| 24 | PA57Z | £1,818.39  |
| 25 | PA58Z | £511.94    |
| 26 | PA59E | £3,319.78  |
| 27 | PA59F | £1,797.45  |
| 28 | PA62Z | £457.81    |
| 29 | PA63B | £636.20    |
| 30 | PA63C | £1,469.76  |
| 31 | PA65A | £458.62    |
| 32 | PA67Z | £1,642.07  |
| 33 | PA68Z | £2,000.68  |
| 34 | PA69Z | £1,873.06  |
| 35 | PA70Z | £477.02    |
| 36 | QZ01C | £13,766.98 |
| 37 | QZ01D | £11,208.28 |
| 38 | QZ01E | £8,378.49  |
| 39 | QZ01F | £7,077.00  |
| 40 | QZ02C | £13,767.89 |
| 41 | QZ02D | £9,768.56  |
| 42 | QZ02E | £6,446.11  |
| 43 | QZ02F | £5,459.81  |
| 44 | QZ03B | £10,563.15 |
| 45 | QZ05C | £1,898.17  |
| 46 | QZ05D | £1,009.31  |
| 47 | QZ05E | £1,008.63  |
| 48 | QZ05F | £1,047.03  |
| 49 |       |            |
| 50 |       |            |
| 51 |       |            |
| 52 |       |            |
| 53 |       |            |
| 54 |       |            |
| 55 |       |            |
| 56 |       |            |
| 57 |       |            |
| 58 |       |            |
| 59 |       |            |
| 60 |       |            |

|    |       |            |
|----|-------|------------|
| 1  |       |            |
| 2  |       |            |
| 3  |       |            |
| 4  | QZ11C | £15,879.14 |
| 5  | QZ11D | £12,287.67 |
| 6  | QZ11E | £10,158.69 |
| 7  | QZ11F | £8,750.96  |
| 8  | QZ12A | £9,783.80  |
| 9  | QZ12B | £6,657.74  |
| 10 | QZ12C | £5,260.20  |
| 11 | QZ12D | £4,373.55  |
| 12 | QZ12E | £1,098.05  |
| 13 | QZ13Z | £1,805.34  |
| 14 | QZ14Z | £474.97    |
| 15 | QZ15D | £8,857.14  |
| 16 | QZ15E | £9,724.57  |
| 17 | QZ15F | £4,155.53  |
| 18 | QZ15G | £2,494.01  |
| 19 | QZ15H | £3,368.50  |
| 20 | QZ15J | £2,291.41  |
| 21 | QZ16D | £1,312.97  |
| 22 | QZ16E | £864.87    |
| 23 | QZ16F | £3,951.22  |
| 24 | QZ16G | £3,331.18  |
| 25 | QZ16H | £3,224.26  |
| 26 | QZ17D | £5,790.42  |
| 27 | QZ17E | £4,782.02  |
| 28 | QZ17F | £693.37    |
| 29 | QZ17G | £671.77    |
| 30 | QZ17H | £2,194.59  |
| 31 | QZ17J | £512.96    |
| 32 | QZ19Z | £1,832.80  |
| 33 | QZ20B | £494.16    |
| 34 | QZ20C | £2,516.87  |
| 35 | QZ20D | £1,587.00  |
| 36 | QZ20E | £1,201.02  |
| 37 | QZ21A | £1,534.74  |
| 38 | QZ21B | £1,528.98  |
| 39 | QZ22A | £1,230.38  |
| 40 | QZ22B | £1,074.02  |
| 41 | QZ24A | £5,212.58  |
| 42 | QZ24B | £4,172.97  |
| 43 | QZ24C | £3,943.14  |
| 44 | QZ25A | £5,607.22  |
| 45 | QZ25B | £3,814.50  |
| 46 | RC02Z | £1,807.21  |
| 47 | RC12A | £8,332.30  |
| 48 | RC12C | £10,406.44 |
| 49 |       |            |
| 50 |       |            |
| 51 |       |            |
| 52 |       |            |
| 53 |       |            |
| 54 |       |            |
| 55 |       |            |
| 56 |       |            |
| 57 |       |            |
| 58 |       |            |
| 59 |       |            |
| 60 |       |            |

|       |            |
|-------|------------|
| RC12D | £10,515.15 |
| RC12E | £12,466.92 |
| RC13C | £18,285.51 |
| RC14Z | £2,650.85  |
| RC15Z | £3,250.40  |
| RC16Z | £5,947.00  |
| RC31Z | £3,080.66  |
| RC32Z | £3,359.62  |
| RC33Z | £4,940.19  |
| RC41Z | £1,957.52  |
| RC51Z | £8,339.11  |
| SA01G | £3,209.85  |
| SA01H | £621.99    |
| SA02G | £3,698.15  |
| SA02H | £817.28    |
| SA02J | £3,068.06  |
| SA03G | £2,722.24  |
| SA04G | £426.96    |
| SA04H | £584.04    |
| SA04J | £526.03    |
| SA04K | £308.79    |
| SA04L | £360.21    |
| SA05H | £1,751.69  |
| SA05J | £364.28    |
| SA06G | £932.47    |
| SA06H | £323.49    |
| SA06J | £636.20    |
| SA06K | £914.14    |
| SA07G | £285.16    |
| SA07H | £3,223.75  |
| SA07J | £314.78    |
| SA08G | £554.24    |
| SA08H | £2,050.03  |
| SA08J | £502.54    |
| SA09G | £3,267.18  |
| SA09H | £2,310.08  |
| SA09J | £556.94    |
| SA09K | £1,493.30  |
| SA09L | £1,293.93  |
| SA12G | £3,574.36  |
| SA12H | £2,586.97  |
| SA12J | £372.45    |
| SA12K | £707.78    |
| SA13A | £482.51    |
| SA13B | £705.55    |



|    |       |            |
|----|-------|------------|
| 1  |       |            |
| 2  |       |            |
| 3  | SA14Z | £9,908.42  |
| 4  |       |            |
| 5  | SA17G | £4,081.88  |
| 6  | SA17H | £288.20    |
| 7  | SA18Z | £727.73    |
| 8  |       |            |
| 9  | SA19A | £9,817.12  |
| 10 | SA21A | £68,952.39 |
| 11 | SA24J | £4,535.27  |
| 12 |       |            |
| 13 | SA25G | £12,199.39 |
| 14 | SA25H | £512.39    |
| 15 | SA25J | £11,638.22 |
| 16 | SA25K | £8,970.10  |
| 17 | SA25L | £5,147.49  |
| 18 | SA25M | £391.34    |
| 19 | SA26A | £16,115.69 |
| 20 |       |            |
| 21 | SA30A | £8,376.93  |
| 22 | SA30B | £4,480.35  |
| 23 | SA30C | £3,983.43  |
| 24 | SA30D | £3,241.63  |
| 25 | SA30E | £362.36    |
| 26 |       |            |
| 27 | SA31A | £10,209.91 |
| 28 | SA31B | £6,511.20  |
| 29 | SA31C | £4,395.19  |
| 30 | SA31D | £411.14    |
| 31 | SA31E | £3,279.83  |
| 32 | SA31F | £389.52    |
| 33 | SA32C | £337.90    |
| 34 | SA32D | £384.63    |
| 35 | SA33Z | £530.82    |
| 36 | SA34Z | £3,816.68  |
| 37 | SA35B | £3,345.86  |
| 38 | SA35C | £2,548.07  |
| 39 | SA35D | £549.89    |
| 40 | SA35E | £1,775.76  |
| 41 | SA36A | £3,799.11  |
| 42 | SA36B | £2,409.34  |
| 43 | SA36C | £468.24    |
| 44 | SA37Z | £390.80    |
| 45 | SB97Z | £0.00      |
| 46 | SC97Z | £0.00      |
| 47 | UZ01Z | £0.00      |
| 48 | VA10A | £569.25    |
| 49 | VA10B | £2,655.92  |
| 50 | VA10C | £3,280.54  |
| 51 | VA10D | £5,207.60  |
| 52 | VA11A | £857.58    |
| 53 |       |            |
| 54 |       |            |
| 55 |       |            |
| 56 |       |            |
| 57 |       |            |
| 58 |       |            |
| 59 |       |            |
| 60 |       |            |

|    |       |            |
|----|-------|------------|
| 1  |       |            |
| 2  |       |            |
| 3  |       |            |
| 4  | VA11B | £3,622.68  |
| 5  | VA11C | £1,163.69  |
| 6  | VA11D | £8,685.13  |
| 7  | VA12A | £4,935.13  |
| 8  | VA12B | £1,778.03  |
| 9  | VA12C | £7,170.38  |
| 10 | VA12D | £9,786.02  |
| 11 | VA13A | £5,525.23  |
| 12 | VA13B | £5,696.81  |
| 13 | VA13C | £8,641.99  |
| 14 | VA13D | £12,174.40 |
| 15 | VA14A | £7,821.35  |
| 16 | VA14D | £7,835.66  |
| 17 | VA15C | £15,836.28 |
| 18 | WA01W | £5,006.52  |
| 19 | WA01Y | £3,209.65  |
| 20 | WA02Z | £406.25    |
| 21 | WA03A | £4,572.79  |
| 22 | WA03B | £3,147.09  |
| 23 | WA03C | £2,223.86  |
| 24 | WA04Z | £1,214.85  |
| 25 | WA05Z | £3,334.39  |
| 26 | WA06A | £6,054.21  |
| 27 | WA06B | £450.56    |
| 28 | WA06C | £404.27    |
| 29 | WA07Z | £520.48    |
| 30 | WA08Z | £538.90    |
| 31 | WA09A | £4,100.05  |
| 32 | WA09B | £2,587.80  |
| 33 | WA09C | £1,968.41  |
| 34 | WA10Z | £2,088.53  |
| 35 | WA11A | £2,223.02  |
| 36 | WA11B | £412.34    |
| 37 | WA11C | £390.24    |
| 38 | WA12A | £6,114.94  |
| 39 | WA12B | £3,756.52  |
| 40 | WA12C | £2,821.56  |
| 41 | WA12D | £2,046.96  |
| 42 | WA14A | £374.61    |
| 43 | WA14B | £673.71    |
| 44 | WA15A | £7,799.86  |
| 45 | WA15B | £4,036.00  |
| 46 | WA15V | £1,059.85  |
| 47 | WA16W | £1,364.77  |
| 48 | WA16Y | £370.14    |
| 49 |       |            |
| 50 |       |            |
| 51 |       |            |
| 52 |       |            |
| 53 |       |            |
| 54 |       |            |
| 55 |       |            |
| 56 |       |            |
| 57 |       |            |
| 58 |       |            |
| 59 |       |            |
| 60 |       |            |

|    |       |           |
|----|-------|-----------|
| 1  |       |           |
| 2  |       |           |
| 3  |       |           |
| 4  | WA17A | £3,987.07 |
| 5  | WA17C | £1,580.32 |
| 6  | WA17D | £1,368.60 |
| 7  | WA18A | £4,264.16 |
| 8  | WA18B | £2,467.62 |
| 9  | WA18C | £451.85   |
| 10 | WA18D | £473.55   |
| 11 | WA18E | £1,661.02 |
| 12 | WA18F | £427.71   |
| 13 | WA19Z | £1,356.43 |
| 14 | WA20Z | £409.28   |
| 15 | WA21Z | £286.31   |
| 16 | WA22A | £3,165.03 |
| 17 | WA22B | £506.13   |
| 18 | WA22C | £1,929.65 |
| 19 | WA23A | £4,292.64 |
| 20 | WA23B | £1,826.64 |
| 21 | WA23C | £1,871.27 |
| 22 | WA24A | £1,281.84 |
| 23 | WA24B | £1,005.80 |
| 24 | WD11Z | £480.61   |
| 25 | WD22Z | £379.98   |
| 26 | WF01A | £0.00     |
| 27 | WF02A | £0.00     |
| 28 |       |           |
| 29 |       |           |
| 30 |       |           |
| 31 |       |           |
| 32 |       |           |
| 33 |       |           |
| 34 |       |           |
| 35 |       |           |
| 36 |       |           |
| 37 |       |           |
| 38 |       |           |
| 39 |       |           |
| 40 |       |           |
| 41 |       |           |
| 42 |       |           |
| 43 |       |           |
| 44 |       |           |
| 45 |       |           |
| 46 |       |           |
| 47 |       |           |
| 48 |       |           |
| 49 |       |           |
| 50 |       |           |
| 51 |       |           |
| 52 |       |           |
| 53 |       |           |
| 54 |       |           |
| 55 |       |           |
| 56 |       |           |
| 57 |       |           |
| 58 |       |           |
| 59 |       |           |
| 60 |       |           |

Source: NHS Digital. HRG4+ 2012/13 Reference Costs Grouper and Documentation. Available online:  
<http://content.digital.nhs.uk/article/4698/HRG4-201213-Reference-Costs-Grouper-and-Documentation>.

Table E. Unit costs of pain medications

| Product code <sup>1</sup> | Unit cost |
|---------------------------|-----------|
| 4                         | 0.877     |
| 7                         | 0.058     |
| 11                        | 0.041     |
| 15                        | 0.048     |
| 19                        | 0.058     |
| 40                        | 0.057     |
| 49                        | 0.036     |
| 53                        | 0.044     |
| 57                        | 0.058     |
| 83                        | 0.032     |
| 86                        | 0.046     |
| 96                        | 0.051     |
| 112                       | 0.061     |
| 120                       | 0.061     |
| 123                       | 0.862     |
| 124                       | 0.877     |
| 126                       | 0.023     |
| 129                       | 0.098     |
| 139                       | 0.058     |
| 140                       | 0.098     |
| 141                       | 0.121     |
| 156                       | 0.603     |
| 157                       | 0.311     |
| 158                       | 0.051     |
| 162                       | 0.057     |
| 177                       | 0.061     |
| 182                       | 0.035     |
| 187                       | 0.046     |
| 191                       | 0.107     |
| 213                       | 0.057     |
| 234                       | 0.962     |
| 249                       | 0.458     |
| 258                       | 0.058     |
| 259                       | 0.023     |
| 262                       | 0.877     |
| 296                       | 0.064     |
| 306                       | 0.057     |
| 320                       | 0.492     |
| 328                       | 1.044     |
| 332                       | 0.061     |
| 341                       | 0.121     |
| 354                       | 10.546    |

1  
2  
3  
4  
5  
6  
7  
8  
9  
10  
11  
12  
13  
14  
15  
16  
17  
18  
19  
20  
21  
22  
23  
24  
25  
26  
27  
28  
29  
30  
31  
32  
33  
34  
35  
36  
37  
38  
39  
40  
41  
42  
43  
44  
45  
46  
47  
48  
49  
50  
51  
52  
53  
54  
55  
56  
57  
58  
59  
60

|     |        |
|-----|--------|
| 360 | 0.936  |
| 382 | 0.038  |
| 387 | 0.267  |
| 389 | 0.135  |
| 392 | 0.057  |
| 396 | 0.101  |
| 402 | 0.057  |
| 407 | 0.098  |
| 416 | 0.057  |
| 417 | 0.057  |
| 423 | 0.458  |
| 447 | 0.207  |
| 458 | 0.166  |
| 462 | 2.37   |
| 474 | 0.359  |
| 487 | 0.036  |
| 495 | 0.046  |
| 497 | 0.076  |
| 499 | 0.057  |
| 526 | 0.161  |
| 539 | 0.128  |
| 551 | 5.06   |
| 580 | 0.207  |
| 586 | 0.057  |
| 589 | 0.057  |
| 595 | 0.036  |
| 597 | 0.057  |
| 607 | 0.262  |
| 612 | 0.076  |
| 617 | 0.493  |
| 620 | 3.598  |
| 625 | 0.058  |
| 628 | 0.076  |
| 635 | 2.37   |
| 647 | 0.936  |
| 649 | 0.076  |
| 650 | 0.718  |
| 655 | 0.633  |
| 656 | 0.058  |
| 659 | 0.192  |
| 660 | 0.042  |
| 661 | 0.045  |
| 676 | 0.829  |
| 685 | 45.472 |
| 687 | 0.155  |

|      |       |
|------|-------|
| 701  | 0.046 |
| 715  | 15    |
| 736  | 0.05  |
| 748  | 3.598 |
| 754  | 0.035 |
| 757  | 6.731 |
| 759  | 0.029 |
| 767  | 0.058 |
| 784  | 0.166 |
| 790  | 1.15  |
| 800  | 0.051 |
| 807  | 0.098 |
| 810  | 0.051 |
| 819  | 1.15  |
| 826  | 0.71  |
| 827  | 0.603 |
| 838  | 0.813 |
| 849  | 0.048 |
| 850  | 0.035 |
| 855  | 0.029 |
| 899  | 0.877 |
| 901  | 0.029 |
| 913  | 0.057 |
| 917  | 0.057 |
| 919  | 1.761 |
| 920  | 1.761 |
| 928  | 0.076 |
| 1030 | 0.016 |
| 1043 | 0.118 |
| 1051 | 0.076 |
| 1068 | 0.877 |
| 1073 | 0.064 |
| 1075 | 0.057 |
| 1086 | 0.098 |
| 1096 | 0.076 |
| 1115 | 0.311 |
| 1116 | 0.311 |
| 1139 | 0.076 |
| 1147 | 0.029 |
| 1156 | 0.061 |
| 1208 | 0.036 |
| 1210 | 0.076 |
| 1231 | 0.433 |
| 1233 | 0.207 |
| 1246 | 0.023 |

1  
2  
3  
4  
5  
6  
7  
8  
9  
10  
11  
12  
13  
14  
15  
16  
17  
18  
19  
20  
21  
22  
23  
24  
25  
26  
27  
28  
29  
30  
31  
32  
33  
34  
35  
36  
37  
38  
39  
40  
41  
42  
43  
44  
45  
46  
47  
48  
49  
50  
51  
52  
53  
54  
55  
56  
57  
58  
59  
60

|      |        |
|------|--------|
| 1261 | 0.051  |
| 1270 | 0.061  |
| 1392 | 0.138  |
| 1404 | 0.877  |
| 1446 | 0.057  |
| 1468 | 0.057  |
| 1469 | 0.045  |
| 1470 | 0.045  |
| 1496 | 0.076  |
| 1503 | 0.633  |
| 1544 | 0.052  |
| 1571 | 0.433  |
| 1584 | 0.072  |
| 1609 | 0.058  |
| 1621 | 0.057  |
| 1640 | 0.058  |
| 1688 | 0.05   |
| 1689 | 0.029  |
| 1692 | 0.057  |
| 1708 | 0.166  |
| 1739 | 0.048  |
| 1755 | 0.307  |
| 1766 | 0.207  |
| 1778 | 0.267  |
| 1808 | 70.239 |
| 1862 | 0.058  |
| 1866 | 0.098  |
| 1888 | 0.037  |
| 1983 | 0.023  |
| 1984 | 0.311  |
| 1999 | 1.38   |
| 2034 | 1.38   |
| 2040 | 0.058  |
| 2041 | 0.093  |
| 2047 | 0.057  |
| 2055 | 0.877  |
| 2129 | 0.138  |
| 2197 | 0.115  |
| 2200 | 0.061  |
| 2211 | 0.058  |
| 2234 | 0.153  |
| 2235 | 0.153  |
| 2243 | 0.035  |
| 2257 | 0.267  |
| 2288 | 0.045  |

|      |       |
|------|-------|
| 2293 | 0.829 |
| 2344 | 0.029 |
| 2366 | 0.195 |
| 2367 | 0.68  |
| 2382 | 0.267 |
| 2386 | 0.311 |
| 2387 | 0.207 |
| 2450 | 0.962 |
| 2462 | 0.877 |
| 2463 | 0.121 |
| 2486 | 0.036 |
| 2525 | 0.035 |
| 2555 | 0.041 |
| 2586 | 0.029 |
| 2606 | 0.036 |
| 2622 | 0.138 |
| 2671 | 0.05  |
| 2693 | 0.061 |
| 2794 | 0.051 |
| 2800 | 0.058 |
| 2827 | 0.121 |
| 2846 | 0.057 |
| 2858 | 0.052 |
| 2863 | 0.267 |
| 2904 | 0.207 |
| 2917 | 0.057 |
| 2936 | 0.596 |
| 2938 | 0.016 |
| 2952 | 0.013 |
| 2957 | 0.192 |
| 2966 | 0.458 |
| 2985 | 0.037 |
| 2986 | 0.057 |
| 2997 | 0.046 |
| 3043 | 0.813 |
| 3053 | 0.098 |
| 3064 | 0.22  |
| 3074 | 0.029 |
| 3077 | 0.036 |
| 3156 | 0.058 |
| 3165 | 2.808 |
| 3168 | 0.688 |
| 3170 | 0.045 |
| 3182 | 0.103 |
| 3183 | 0.596 |



1  
2  
3  
4  
5  
6  
7  
8  
9  
10  
11  
12  
13  
14  
15  
16  
17  
18  
19  
20  
21  
22  
23  
24  
25  
26  
27  
28  
29  
30  
31  
32  
33  
34  
35  
36  
37  
38  
39  
40  
41  
42  
43  
44  
45  
46  
47  
48  
49  
50  
51  
52  
53  
54  
55  
56  
57  
58  
59  
60

|      |       |
|------|-------|
| 3185 | 0.057 |
| 3216 | 0.061 |
| 3239 | 0.197 |
| 3266 | 0.103 |
| 3311 | 0.326 |
| 3313 | 0.028 |
| 3316 | 0.029 |
| 3326 | 0.433 |
| 3378 | 0.046 |
| 3409 | 0.307 |
| 3416 | 0.311 |
| 3421 | 0.207 |
| 3431 | 0.045 |
| 3432 | 0.115 |
| 3435 | 0.058 |
| 3490 | 0.032 |
| 3496 | 0.045 |
| 3522 | 0.101 |
| 3597 | 0.057 |
| 3599 | 0.098 |
| 3644 | 0.29  |
| 3653 | 1.219 |
| 3698 | 0.115 |
| 3710 | 0.307 |
| 3713 | 0.058 |
| 3724 | 0.058 |
| 3777 | 0.032 |
| 3794 | 0.118 |
| 3817 | 0.118 |
| 3852 | 0.311 |
| 3897 | 0.532 |
| 3901 | 0.098 |
| 3903 | 0.95  |
| 3919 | 0.046 |
| 3935 | 0.307 |
| 3958 | 0.076 |
| 3972 | 0.045 |
| 3974 | 0.577 |
| 4016 | 0.118 |
| 4043 | 9.402 |
| 4045 | 0.115 |
| 4095 | 0.158 |
| 4114 | 0.29  |
| 4115 | 0.29  |
| 4118 | 0.596 |

|    |      |        |
|----|------|--------|
| 1  |      |        |
| 2  |      |        |
| 3  | 4186 | 0.028  |
| 4  | 4196 | 2.107  |
| 5  |      |        |
| 6  | 4216 | 0.098  |
| 7  |      |        |
| 8  | 4266 | 0.046  |
| 9  | 4280 | 0.055  |
| 10 | 4298 | 0.057  |
| 11 | 4309 | 0.057  |
| 12 |      |        |
| 13 | 4320 | 0.453  |
| 14 | 4368 | 0.326  |
| 15 | 4369 | 0.057  |
| 16 |      |        |
| 17 | 4469 | 0.095  |
| 18 | 4476 | 0.371  |
| 19 | 4477 | 0.371  |
| 20 |      |        |
| 21 | 4506 | 0.207  |
| 22 | 4556 | 0.058  |
| 23 |      |        |
| 24 | 4564 | 0.095  |
| 25 | 4565 | 0.095  |
| 26 | 4600 | 0.877  |
| 27 | 4607 | 0.877  |
| 28 |      |        |
| 29 | 4625 | 0.207  |
| 30 | 4631 | 0.057  |
| 31 | 4633 | 0.877  |
| 32 |      |        |
| 33 | 4648 | 0.061  |
| 34 | 4671 | 0.051  |
| 35 | 4682 | 0.037  |
| 36 | 4690 | 0.032  |
| 37 |      |        |
| 38 | 4691 | 11.573 |
| 39 | 4692 | 0.057  |
| 40 |      |        |
| 41 | 4693 | 0.633  |
| 42 | 4710 | 0.023  |
| 43 | 4713 | 0.829  |
| 44 |      |        |
| 45 | 4731 | 0.016  |
| 46 | 4762 | 0.061  |
| 47 | 4781 | 0.05   |
| 48 | 4805 | 0.038  |
| 49 |      |        |
| 50 | 4806 | 0.311  |
| 51 | 4823 | 0.115  |
| 52 |      |        |
| 53 | 4834 | 0.406  |
| 54 | 4880 | 0.207  |
| 55 | 4911 | 0.048  |
| 56 | 4950 | 0.044  |
| 57 |      |        |
| 58 | 4965 | 0.307  |
| 59 | 4999 | 0.406  |
| 60 | 5025 | 70.239 |
|    | 5028 | 0.541  |

1  
2  
3  
4  
5  
6  
7  
8  
9  
10  
11  
12  
13  
14  
15  
16  
17  
18  
19  
20  
21  
22  
23  
24  
25  
26  
27  
28  
29  
30  
31  
32  
33  
34  
35  
36  
37  
38  
39  
40  
41  
42  
43  
44  
45  
46  
47  
48  
49  
50  
51  
52  
53  
54  
55  
56  
57  
58  
59  
60

|      |       |
|------|-------|
| 5048 | 6.731 |
| 5079 | 7.562 |
| 5080 | 0.718 |
| 5085 | 0.057 |
| 5137 | 0.315 |
| 5138 | 0.158 |
| 5169 | 0.541 |
| 5173 | 0.184 |
| 5175 | 0.359 |
| 5200 | 0.057 |
| 5221 | 0.104 |
| 5239 | 1.343 |
| 5243 | 0.058 |
| 5254 | 0.718 |
| 5257 | 0.406 |
| 5266 | 0.517 |
| 5268 | 0.098 |
| 5323 | 0.028 |
| 5339 | 0.059 |
| 5401 | 0.076 |
| 5407 | 0.453 |
| 5455 | 0.517 |
| 5482 | 0.684 |
| 5487 | 0.633 |
| 5535 | 0.633 |
| 5555 | 0.633 |
| 5563 | 0.262 |
| 5575 | 0.633 |
| 5585 | 0.461 |
| 5599 | 0.461 |
| 5648 | 0.057 |
| 5651 | 7.04  |
| 5652 | 0.5   |
| 5657 | 9.402 |
| 5664 | 0.166 |
| 5665 | 0.633 |
| 5668 | 7.562 |
| 5670 | 7.562 |
| 5681 | 0.046 |
| 5696 | 6.348 |
| 5697 | 6.609 |
| 5714 | 0.166 |
| 5767 | 0.061 |
| 5812 | 0.82  |
| 5833 | 4.409 |

|    |      |        |
|----|------|--------|
| 1  | 5840 | 0.633  |
| 2  |      |        |
| 3  | 5843 | 0.461  |
| 4  |      |        |
| 5  | 5896 | 0.061  |
| 6  |      |        |
| 7  | 5936 | 3.95   |
| 8  |      |        |
| 9  | 5938 | 0.861  |
| 10 | 5955 | 0.058  |
| 11 | 5991 | 0.586  |
| 12 |      |        |
| 13 | 6002 | 0.046  |
| 14 | 6035 | 0.052  |
| 15 | 6040 | 5.928  |
| 16 | 6056 | 0.886  |
| 17 |      |        |
| 18 | 6115 | 0.603  |
| 19 | 6153 | 0.406  |
| 20 |      |        |
| 21 | 6181 | 7.9    |
| 22 | 6208 | 0.603  |
| 23 | 6210 | 0.886  |
| 24 | 6215 | 0.541  |
| 25 | 6225 | 0.59   |
| 26 | 6226 | 45.472 |
| 27 | 6231 | 70.239 |
| 28 | 6232 | 0.262  |
| 29 | 6234 | 0.196  |
| 30 | 6249 | 0.195  |
| 31 | 6269 | 0.262  |
| 32 | 6298 | 9.402  |
| 33 | 6304 | 0.072  |
| 34 | 6312 | 0.035  |
| 35 | 6366 | 0.5    |
| 36 | 6414 | 3.025  |
| 37 | 6435 | 0.603  |
| 38 | 6458 | 7.562  |
| 39 | 6459 | 7.562  |
| 40 | 6464 | 0.718  |
| 41 | 6498 | 0.82   |
| 42 | 6547 | 0.378  |
| 43 | 6557 | 0.229  |
| 44 | 6558 | 0.155  |
| 45 | 6571 | 2.107  |
| 46 | 6584 | 1.15   |
| 47 | 6608 | 0.945  |
| 48 | 6609 | 1.928  |
| 49 | 6631 | 1.15   |
| 50 | 6699 | 1.195  |
| 51 | 6708 | 1.93   |
| 52 |      |        |
| 53 | 6736 | 0.262  |
| 54 |      |        |
| 55 |      |        |
| 56 |      |        |
| 57 |      |        |
| 58 |      |        |
| 59 |      |        |
| 60 |      |        |

1  
2  
3  
4  
5  
6  
7  
8  
9  
10  
11  
12  
13  
14  
15  
16  
17  
18  
19  
20  
21  
22  
23  
24  
25  
26  
27  
28  
29  
30  
31  
32  
33  
34  
35  
36  
37  
38  
39  
40  
41  
42  
43  
44  
45  
46  
47  
48  
49  
50  
51  
52  
53  
54  
55  
56  
57  
58  
59  
60

|      |        |
|------|--------|
| 6769 | 0.229  |
| 6790 | 0.229  |
| 6853 | 0.061  |
| 6879 | 3.95   |
| 6881 | 0.603  |
| 6886 | 0.051  |
| 6892 | 0.939  |
| 6917 | 5.928  |
| 6936 | 1.15   |
| 6948 | 3.578  |
| 6949 | 1.15   |
| 6999 | 1.138  |
| 7005 | 1.15   |
| 7058 | 0.016  |
| 7063 | 0.877  |
| 7072 | 0.038  |
| 7082 | 3.598  |
| 7104 | 0.058  |
| 7107 | 6.731  |
| 7114 | 4.315  |
| 7126 | 2.518  |
| 7141 | 0.061  |
| 7167 | 0.229  |
| 7197 | 0.192  |
| 7205 | 0.058  |
| 7208 | 1.138  |
| 7209 | 1.15   |
| 7236 | 7.888  |
| 7238 | 14.365 |
| 7261 | 0.061  |
| 7275 | 0.945  |
| 7334 | 4.4    |
| 7372 | 0.945  |
| 7389 | 0.945  |
| 7394 | 1.15   |
| 7397 | 9.402  |
| 7406 | 0.461  |
| 7428 | 0.059  |
| 7432 | 0.381  |
| 7434 | 0.532  |
| 7450 | 0.862  |
| 7457 | 0.492  |
| 7469 | 0.107  |
| 7488 | 0.118  |
| 7489 | 0.029  |

|      |        |
|------|--------|
| 7490 | 0.195  |
| 7499 | 0.057  |
| 7517 | 0.166  |
| 7518 | 0.057  |
| 7520 | 0.877  |
| 7524 | 0.307  |
| 7534 | 0.057  |
| 7535 | 0.057  |
| 7538 | 0.34   |
| 7542 | 0.057  |
| 7555 | 4.4    |
| 7667 | 0.158  |
| 7677 | 0.596  |
| 7678 | 0.95   |
| 7692 | 70.239 |
| 7729 | 0.633  |
| 7751 | 0.036  |
| 7780 | 0.596  |
| 7840 | 0.488  |
| 7849 | 8.543  |
| 7875 | 0.192  |
| 7913 | 0.267  |
| 7999 | 2.297  |
| 8017 | 0.22   |
| 8039 | 1.276  |
| 8040 | 3.028  |
| 8062 | 0.207  |
| 8075 | 0.964  |
| 8139 | 0.877  |
| 8233 | 0.057  |
| 8246 | 0.057  |
| 8329 | 0.057  |
| 8332 | 0.037  |
| 8335 | 0.058  |
| 8375 | 0.68   |
| 8385 | 0.488  |
| 8401 | 0.048  |
| 8416 | 0.541  |
| 8447 | 0.197  |
| 8451 | 0.326  |
| 8456 | 0.093  |
| 8493 | 0.773  |
| 8510 | 0.061  |
| 8600 | 0.307  |
| 8640 | 0.95   |

1  
2  
3  
4  
5  
6  
7  
8  
9  
10  
11  
12  
13  
14  
15  
16  
17  
18  
19  
20  
21  
22  
23  
24  
25  
26  
27  
28  
29  
30  
31  
32  
33  
34  
35  
36  
37  
38  
39  
40  
41  
42  
43  
44  
45  
46  
47  
48  
49  
50  
51  
52  
53  
54  
55  
56  
57  
58  
59  
60

|      |        |
|------|--------|
| 8663 | 0.098  |
| 8672 | 0.307  |
| 8726 | 0.032  |
| 8735 | 4.315  |
| 8740 | 0.192  |
| 8789 | 0.311  |
| 8822 | 0.371  |
| 8831 | 0.035  |
| 8866 | 0.235  |
| 8876 | 0.262  |
| 8878 | 0.032  |
| 8882 | 0.052  |
| 8969 | 0.136  |
| 9001 | 2.595  |
| 9012 | 4.409  |
| 9044 | 0.057  |
| 9053 | 37.365 |
| 9129 | 0.057  |
| 9137 | 0.262  |
| 9163 | 0.107  |
| 9183 | 0.586  |
| 9201 | 0.061  |
| 9209 | 0.155  |
| 9222 | 0.207  |
| 9231 | 0.029  |
| 9239 | 0.029  |
| 9271 | 1.38   |
| 9275 | 0.196  |
| 9313 | 0.155  |
| 9325 | 0.513  |
| 9329 | 0.877  |
| 9330 | 0.315  |
| 9331 | 0.513  |
| 9332 | 0.375  |
| 9337 | 0.192  |
| 9342 | 0.371  |
| 9371 | 1.041  |
| 9381 | 0.787  |
| 9389 | 0.046  |
| 9396 | 0.29   |
| 9421 | 0.036  |
| 9432 | 0.057  |
| 9439 | 9.402  |
| 9457 | 0.057  |
| 9460 | 0.057  |

|    |       |       |
|----|-------|-------|
| 1  |       |       |
| 2  |       |       |
| 3  |       |       |
| 4  | 9462  | 0.057 |
| 5  | 9465  | 0.311 |
| 6  | 9474  | 0.161 |
| 7  | 9476  | 0.058 |
| 8  | 9484  | 0.371 |
| 9  | 9500  | 0.207 |
| 10 | 9516  | 0.058 |
| 11 | 9557  | 0.166 |
| 12 | 9562  | 0.044 |
| 13 | 9602  | 0.055 |
| 14 | 9615  | 0.158 |
| 15 | 9630  | 0.052 |
| 16 | 9637  | 0.184 |
| 17 | 9672  | 0.586 |
| 18 | 9688  | 0.207 |
| 19 | 9712  | 0.028 |
| 20 | 9728  | 0.013 |
| 21 | 9736  | 0.262 |
| 22 | 9739  | 0.29  |
| 23 | 9742  | 0.057 |
| 24 | 9785  | 0.058 |
| 25 | 9822  | 0.861 |
| 26 | 9855  | 0.058 |
| 27 | 9874  | 1.928 |
| 28 | 9886  | 0.057 |
| 29 | 9914  | 0.028 |
| 30 | 9917  | 0.058 |
| 31 | 9927  | 1.93  |
| 32 | 9928  | 3.025 |
| 33 | 9945  | 0.235 |
| 34 | 9960  | 0.371 |
| 35 | 9966  | 0.59  |
| 36 | 9973  | 0.461 |
| 37 | 10007 | 0.042 |
| 38 | 10021 | 3.578 |
| 39 | 10023 | 0.107 |
| 40 | 10033 | 0.136 |
| 41 | 10077 | 0.378 |
| 42 | 10122 | 0.041 |
| 43 | 10149 | 0.057 |
| 44 | 10169 | 0.307 |
| 45 | 10176 | 0.058 |
| 46 | 10178 | 0.058 |
| 47 | 10189 | 1.15  |
| 48 | 10196 | 0.058 |
| 49 |       |       |
| 50 |       |       |
| 51 |       |       |
| 52 |       |       |
| 53 |       |       |
| 54 |       |       |
| 55 |       |       |
| 56 |       |       |
| 57 |       |       |
| 58 |       |       |
| 59 |       |       |
| 60 |       |       |



1  
2  
3  
4  
5  
6  
7  
8  
9  
10  
11  
12  
13  
14  
15  
16  
17  
18  
19  
20  
21  
22  
23  
24  
25  
26  
27  
28  
29  
30  
31  
32  
33  
34  
35  
36  
37  
38  
39  
40  
41  
42  
43  
44  
45  
46  
47  
48  
49  
50  
51  
52  
53  
54  
55  
56  
57  
58  
59  
60

|       |        |
|-------|--------|
| 10205 | 7.888  |
| 10209 | 0.057  |
| 10226 | 0.058  |
| 10239 | 1.301  |
| 10265 | 0.061  |
| 10295 | 0.153  |
| 10309 | 1.219  |
| 10325 | 0.158  |
| 10336 | 0.381  |
| 10509 | 0.862  |
| 10558 | 0.076  |
| 10582 | 0.057  |
| 10583 | 0.862  |
| 10589 | 0.095  |
| 10602 | 0.058  |
| 10625 | 0.688  |
| 10631 | 0.046  |
| 10678 | 0.095  |
| 10701 | 0.057  |
| 10730 | 0.046  |
| 10748 | 0.058  |
| 10769 | 1.044  |
| 10785 | 0.166  |
| 10792 | 0.057  |
| 10866 | 1.361  |
| 10917 | 0.311  |
| 10922 | 11.573 |
| 10925 | 1.92   |
| 10978 | 0.076  |
| 10993 | 0.029  |
| 11009 | 0.057  |
| 11101 | 0.046  |
| 11129 | 45.472 |
| 11168 | 0.311  |
| 11215 | 0.076  |
| 11250 | 0.058  |
| 11275 | 0.865  |
| 11322 | 0.207  |
| 11325 | 0.057  |
| 11342 | 0.633  |
| 11405 | 0.461  |
| 11461 | 0.166  |
| 11466 | 0.153  |
| 11471 | 0.865  |
| 11495 | 0.307  |

|    |       |       |
|----|-------|-------|
| 1  |       |       |
| 2  |       |       |
| 3  | 11522 | 0.603 |
| 4  | 11540 | 0.603 |
| 5  |       |       |
| 6  | 11549 | 0.473 |
| 7  |       |       |
| 8  | 11550 | 0.057 |
| 9  |       |       |
| 10 | 11554 | 0.057 |
| 11 |       |       |
| 12 | 11559 | 0.046 |
| 13 |       |       |
| 14 | 11584 | 7.9   |
| 15 |       |       |
| 16 | 11614 | 0.058 |
| 17 |       |       |
| 18 | 11665 | 0.058 |
| 19 |       |       |
| 20 | 11698 | 0.192 |
| 21 |       |       |
| 22 | 11722 | 0.08  |
| 23 |       |       |
| 24 | 11734 | 0.046 |
| 25 |       |       |
| 26 | 11746 | 0.792 |
| 27 |       |       |
| 28 | 11748 | 1.08  |
| 29 |       |       |
| 30 | 11755 | 0.262 |
| 31 |       |       |
| 32 | 11801 | 1.92  |
| 33 |       |       |
| 34 | 11807 | 0.057 |
| 35 |       |       |
| 36 | 11837 | 0.59  |
| 37 |       |       |
| 38 | 11838 | 1.276 |
| 39 |       |       |
| 40 | 11843 | 6.506 |
| 41 |       |       |
| 42 | 11907 | 0.166 |
| 43 |       |       |
| 44 | 11942 | 0.118 |
| 45 |       |       |
| 46 | 11961 | 0.057 |
| 47 |       |       |
| 48 | 11963 | 0.035 |
| 49 |       |       |
| 50 | 11970 | 0.035 |
| 51 |       |       |
| 52 | 11971 | 0.633 |
| 53 |       |       |
| 54 | 11980 | 0.048 |
| 55 |       |       |
| 56 | 11982 | 2.518 |
| 57 |       |       |
| 58 | 11986 | 0.029 |
| 59 |       |       |
| 60 | 11995 | 0.433 |
|    |       |       |
|    | 11999 | 0.433 |
|    |       |       |
|    | 12000 | 0.433 |
|    |       |       |
|    | 12020 | 2.595 |
|    |       |       |
|    | 12075 | 0.577 |
|    |       |       |
|    | 12122 | 0.135 |
|    |       |       |
|    | 12171 | 0.057 |
|    |       |       |
|    | 12219 | 4.409 |
|    |       |       |
|    | 12353 | 0.95  |
|    |       |       |
|    | 12394 | 0.877 |
|    |       |       |
|    | 12447 | 0.877 |
|    |       |       |
|    | 12549 | 0.596 |
|    |       |       |
|    | 12591 | 0.371 |
|    |       |       |
|    | 12602 | 0.046 |
|    |       |       |
|    | 12604 | 0.586 |
|    |       |       |
|    | 12709 | 0.057 |

1  
2  
3  
4  
5  
6  
7  
8  
9  
10  
11  
12  
13  
14  
15  
16  
17  
18  
19  
20  
21  
22  
23  
24  
25  
26  
27  
28  
29  
30  
31  
32  
33  
34  
35  
36  
37  
38  
39  
40  
41  
42  
43  
44  
45  
46  
47  
48  
49  
50  
51  
52  
53  
54  
55  
56  
57  
58  
59  
60

|       |        |
|-------|--------|
| 12776 | 0.061  |
| 12889 | 0.262  |
| 12900 | 0.192  |
| 12992 | 0.057  |
| 13031 | 0.22   |
| 13076 | 6.506  |
| 13083 | 0.061  |
| 13114 | 0.046  |
| 13117 | 0.192  |
| 13172 | 4.409  |
| 13225 | 4.409  |
| 13280 | 4.409  |
| 13300 | 14.365 |
| 13347 | 0.135  |
| 13380 | 0.684  |
| 13420 | 4.315  |
| 13459 | 0.064  |
| 13606 | 0.061  |
| 13627 | 0.045  |
| 13639 | 0.05   |
| 13711 | 0.262  |
| 13807 | 0.061  |
| 13813 | 0.046  |
| 13818 | 0.153  |
| 13893 | 0.057  |
| 13995 | 1.276  |
| 13997 | 0.586  |
| 14050 | 0.586  |
| 14063 | 0.586  |
| 14084 | 0.207  |
| 14085 | 0.311  |
| 14086 | 1.12   |
| 14156 | 0.633  |
| 14226 | 0.192  |
| 14333 | 0.048  |
| 14378 | 0.058  |
| 14385 | 0.057  |
| 14476 | 0.076  |
| 14490 | 0.046  |
| 14534 | 0.035  |
| 14541 | 0.262  |
| 14551 | 0.877  |
| 14570 | 0.061  |
| 14578 | 0.773  |
| 14602 | 0.128  |

|    |       |        |
|----|-------|--------|
| 1  | 14627 | 0.877  |
| 2  |       |        |
| 3  | 14672 | 0.207  |
| 4  |       |        |
| 5  | 14676 | 0.057  |
| 6  |       |        |
| 7  | 14678 | 0.311  |
| 8  |       |        |
| 9  | 14688 | 0.107  |
| 10 | 14707 | 0.311  |
| 11 | 14776 | 0.267  |
| 12 |       |        |
| 13 | 14785 | 0.057  |
| 14 | 14829 | 0.058  |
| 15 | 14884 | 0.603  |
| 16 | 14899 | 0.028  |
| 17 |       |        |
| 18 | 14900 | 11.573 |
| 19 | 14901 | 0.603  |
| 20 | 14912 | 0.057  |
| 21 |       |        |
| 22 | 14935 | 4.409  |
| 23 | 14964 | 0.058  |
| 24 |       |        |
| 25 | 15005 | 0.061  |
| 26 | 15023 | 0.115  |
| 27 | 15068 | 0.048  |
| 28 |       |        |
| 29 | 15104 | 0.098  |
| 30 | 15159 | 1.275  |
| 31 | 15180 | 0.098  |
| 32 | 15198 | 0.041  |
| 33 |       |        |
| 34 | 15201 | 0.057  |
| 35 | 15238 | 0.058  |
| 36 | 15286 | 0.813  |
| 37 |       |        |
| 38 | 15337 | 7.015  |
| 39 | 15339 | 0.235  |
| 40 |       |        |
| 41 | 15353 | 45.472 |
| 42 | 15361 | 6.915  |
| 43 | 15367 | 0.877  |
| 44 | 15501 | 0.195  |
| 45 | 15732 | 0.057  |
| 46 |       |        |
| 47 | 15767 | 0.061  |
| 48 | 15779 | 0.057  |
| 49 |       |        |
| 50 | 15781 | 0.787  |
| 51 | 15792 | 0.375  |
| 52 | 15793 | 4.315  |
| 53 |       |        |
| 54 | 15798 | 1.001  |
| 55 | 15815 | 0.5    |
| 56 | 15831 | 0.051  |
| 57 | 15845 | 0.058  |
| 58 |       |        |
| 59 | 15871 | 1.343  |
| 60 | 15930 | 0.061  |
|    | 15950 | 1.276  |

1  
2  
3  
4  
5  
6  
7  
8  
9  
10  
11  
12  
13  
14  
15  
16  
17  
18  
19  
20  
21  
22  
23  
24  
25  
26  
27  
28  
29  
30  
31  
32  
33  
34  
35  
36  
37  
38  
39  
40  
41  
42  
43  
44  
45  
46  
47  
48  
49  
50  
51  
52  
53  
54  
55  
56  
57  
58  
59  
60

|       |       |
|-------|-------|
| 15964 | 0.371 |
| 16001 | 0.057 |
| 16039 | 0.057 |
| 16076 | 0.473 |
| 16096 | 0.057 |
| 16106 | 0.058 |
| 16112 | 0.877 |
| 16189 | 4.409 |
| 16192 | 0.057 |
| 16193 | 0.138 |
| 16194 | 0.326 |
| 16215 | 0.05  |
| 16221 | 0.076 |
| 16222 | 0.057 |
| 16225 | 0.311 |
| 16271 | 0.792 |
| 16272 | 0.311 |
| 16273 | 0.192 |
| 16286 | 0.207 |
| 16335 | 4.409 |
| 16395 | 0.541 |
| 16467 | 0.051 |
| 16473 | 0.153 |
| 16474 | 0.153 |
| 16509 | 1.15  |
| 16542 | 1.15  |
| 16592 | 0.057 |
| 16618 | 9.402 |
| 16818 | 0.057 |
| 17029 | 0.207 |
| 17030 | 0.207 |
| 17043 | 0.71  |
| 17068 | 0.061 |
| 17073 | 6.915 |
| 17124 | 0.311 |
| 17126 | 0.207 |
| 17128 | 0.057 |
| 17158 | 0.058 |
| 17165 | 0.098 |
| 17183 | 0.596 |
| 17201 | 0.098 |
| 17386 | 0.962 |
| 17398 | 4.409 |
| 17412 | 0.058 |
| 17491 | 0.207 |

|    |       |        |
|----|-------|--------|
| 1  | 17525 | 0.311  |
| 2  |       |        |
| 3  | 17532 | 0.311  |
| 4  |       |        |
| 5  | 17563 | 0.058  |
| 6  |       |        |
| 7  | 17564 | 0.104  |
| 8  |       |        |
| 9  | 17572 | 0.577  |
| 10 |       |        |
| 11 | 17671 | 1.128  |
| 12 | 17680 | 0.076  |
| 13 | 17733 | 0.098  |
| 14 | 17750 | 0.061  |
| 15 | 17754 | 0.095  |
| 16 | 17818 | 0.433  |
| 17 | 17863 | 1.044  |
| 18 | 17893 | 0.371  |
| 19 | 17896 | 1.128  |
| 20 | 17917 | 0.107  |
| 21 | 17926 | 0.057  |
| 22 | 17936 | 1.276  |
| 23 | 17943 | 0.262  |
| 24 | 17998 | 0.058  |
| 25 | 18151 | 0.603  |
| 26 | 18166 | 1.276  |
| 27 | 18174 | 7.04   |
| 28 | 18196 | 0.016  |
| 29 | 18211 | 0.386  |
| 30 | 18221 | 0.038  |
| 31 | 18234 | 0.076  |
| 32 | 18342 | 0.036  |
| 33 | 18364 | 0.048  |
| 34 | 18371 | 0.311  |
| 35 | 18441 | 1.195  |
| 36 | 18448 | 0.158  |
| 37 | 18491 | 0.458  |
| 38 | 18527 | 0.048  |
| 39 | 18560 | 42.859 |
| 40 | 18566 | 4.409  |
| 41 | 18647 | 0.813  |
| 42 | 18656 | 0.046  |
| 43 | 18662 | 0.076  |
| 44 | 18700 | 0.192  |
| 45 | 18734 | 0.586  |
| 46 | 18792 | 0.235  |
| 47 | 18798 | 0.057  |
| 48 | 18799 | 1.343  |
| 49 | 18800 | 0.59   |
| 50 | 18801 | 0.586  |

1  
2  
3  
4  
5  
6  
7  
8  
9  
10  
11  
12  
13  
14  
15  
16  
17  
18  
19  
20  
21  
22  
23  
24  
25  
26  
27  
28  
29  
30  
31  
32  
33  
34  
35  
36  
37  
38  
39  
40  
41  
42  
43  
44  
45  
46  
47  
48  
49  
50  
51  
52  
53  
54  
55  
56  
57  
58  
59  
60

|       |       |
|-------|-------|
| 18812 | 0.057 |
| 18820 | 0.016 |
| 18881 | 0.046 |
| 18921 | 0.076 |
| 18922 | 0.058 |
| 19007 | 0.098 |
| 19036 | 0.057 |
| 19046 | 0.048 |
| 19092 | 0.5   |
| 19116 | 0.458 |
| 19139 | 0.058 |
| 19146 | 8.77  |
| 19206 | 0.058 |
| 19291 | 0.262 |
| 19317 | 0.057 |
| 19320 | 0.307 |
| 19382 | 0.207 |
| 19398 | 0.061 |
| 19449 | 0.192 |
| 19471 | 0.371 |
| 19477 | 0.586 |
| 19575 | 0.057 |
| 19764 | 0.057 |
| 19779 | 0.035 |
| 19954 | 1.902 |
| 19972 | 1.902 |
| 19993 | 0.29  |
| 20005 | 4.409 |
| 20026 | 0.036 |
| 20036 | 1.275 |
| 20059 | 0.267 |
| 20068 | 0.028 |
| 20105 | 0.076 |
| 20116 | 0.058 |
| 20127 | 0.057 |
| 20310 | 0.046 |
| 20384 | 0.311 |
| 20385 | 0.098 |
| 20386 | 0.326 |
| 20395 | 0.207 |
| 20403 | 0.877 |
| 20442 | 0.061 |
| 20565 | 0.057 |
| 20571 | 0.773 |
| 20621 | 0.207 |

|    |       |       |
|----|-------|-------|
| 1  |       |       |
| 2  |       |       |
| 3  |       |       |
| 4  | 20650 | 0.877 |
| 5  | 20783 | 0.192 |
| 6  | 20805 | 0.207 |
| 7  | 20815 | 0.262 |
| 8  | 20967 | 0.061 |
| 9  | 20978 | 0.057 |
| 10 | 21045 | 0.048 |
| 11 | 21050 | 0.433 |
| 12 | 21081 | 0.035 |
| 13 | 21113 | 0.044 |
| 14 | 21123 | 0.307 |
| 15 | 21229 | 0.877 |
| 16 | 21251 | 0.058 |
| 17 | 21256 | 0.046 |
| 18 | 21275 | 1.001 |
| 19 | 21285 | 2.854 |
| 20 | 21387 | 0.057 |
| 21 | 21397 | 1.08  |
| 22 | 21419 | 0.158 |
| 23 | 21421 | 0.166 |
| 24 | 21444 | 0.076 |
| 25 | 21562 | 0.013 |
| 26 | 21610 | 0.311 |
| 27 | 21673 | 0.057 |
| 28 | 21703 | 0.057 |
| 29 | 21745 | 0.052 |
| 30 | 21777 | 0.541 |
| 31 | 21797 | 0.541 |
| 32 | 21807 | 0.076 |
| 33 | 21811 | 0.057 |
| 34 | 21813 | 0.048 |
| 35 | 21815 | 0.098 |
| 36 | 21816 | 0.098 |
| 37 | 21821 | 0.098 |
| 38 | 21824 | 0.057 |
| 39 | 21831 | 0.023 |
| 40 | 21840 | 0.045 |
| 41 | 21843 | 0.115 |
| 42 | 21846 | 0.307 |
| 43 | 21864 | 0.121 |
| 44 | 21880 | 0.051 |
| 45 | 21947 | 0.406 |
| 46 | 21952 | 8.77  |
| 47 | 21955 | 0.813 |
| 48 | 22014 | 0.029 |
| 49 |       |       |
| 50 |       |       |
| 51 |       |       |
| 52 |       |       |
| 53 |       |       |
| 54 |       |       |
| 55 |       |       |
| 56 |       |       |
| 57 |       |       |
| 58 |       |       |
| 59 |       |       |
| 60 |       |       |



1  
2  
3  
4  
5  
6  
7  
8  
9  
10  
11  
12  
13  
14  
15  
16  
17  
18  
19  
20  
21  
22  
23  
24  
25  
26  
27  
28  
29  
30  
31  
32  
33  
34  
35  
36  
37  
38  
39  
40  
41  
42  
43  
44  
45  
46  
47  
48  
49  
50  
51  
52  
53  
54  
55  
56  
57  
58  
59  
60

|       |       |
|-------|-------|
| 22024 | 0.046 |
| 22026 | 0.192 |
| 22066 | 6.731 |
| 22070 | 0.032 |
| 22206 | 0.166 |
| 22230 | 0.023 |
| 22288 | 0.028 |
| 22305 | 0.877 |
| 22380 | 1.236 |
| 22571 | 0.939 |
| 22690 | 1.041 |
| 22756 | 0.192 |
| 22764 | 0.058 |
| 23026 | 0.076 |
| 23060 | 1.276 |
| 23077 | 0.029 |
| 23114 | 0.029 |
| 23121 | 0.098 |
| 23158 | 0.16  |
| 23204 | 0.076 |
| 23323 | 0.098 |
| 23420 | 0.128 |
| 23425 | 0.057 |
| 23442 | 0.71  |
| 23617 | 0.877 |
| 23625 | 0.406 |
| 23716 | 0.058 |
| 23795 | 1.761 |
| 23840 | 0.058 |
| 23952 | 0.058 |
| 23981 | 0.406 |
| 24000 | 0.058 |
| 24007 | 0.098 |
| 24020 | 0.045 |
| 24075 | 0.058 |
| 24086 | 0.061 |
| 24108 | 7.562 |
| 24121 | 0.076 |
| 24122 | 0.057 |
| 24125 | 0.057 |
| 24128 | 0.076 |
| 24133 | 0.058 |
| 24134 | 0.036 |
| 24137 | 0.061 |
| 24141 | 0.032 |

|    |       |        |
|----|-------|--------|
| 1  |       |        |
| 2  |       |        |
| 3  | 24145 | 0.036  |
| 4  | 24147 | 0.036  |
| 5  |       |        |
| 6  | 24152 | 0.032  |
| 7  | 24193 | 0.061  |
| 8  |       |        |
| 9  | 24212 | 0.05   |
| 10 | 24236 | 0.311  |
| 11 | 24305 | 0.048  |
| 12 |       |        |
| 13 | 24308 | 0.076  |
| 14 | 24320 | 0.05   |
| 15 | 24343 | 0.08   |
| 16 | 24356 | 0.136  |
| 17 | 24361 | 0.16   |
| 18 | 24383 | 0.29   |
| 19 |       |        |
| 20 | 24440 | 0.013  |
| 21 | 24453 | 0.586  |
| 22 | 24469 | 0.936  |
| 23 |       |        |
| 24 | 24531 | 0.577  |
| 25 | 24534 | 0.058  |
| 26 | 24584 | 1.128  |
| 27 |       |        |
| 28 | 24617 | 0.036  |
| 29 | 24640 | 8.543  |
| 30 |       |        |
| 31 | 24680 | 0.032  |
| 32 | 24682 | 0.577  |
| 33 |       |        |
| 34 | 24736 | 2.854  |
| 35 | 24828 | 0.057  |
| 36 | 24830 | 4.436  |
| 37 | 24867 | 0.458  |
| 38 | 24887 | 0.057  |
| 39 |       |        |
| 40 | 24947 | 0.058  |
| 41 | 24986 | 7.014  |
| 42 |       |        |
| 43 | 25109 | 0.058  |
| 44 | 25185 | 0.493  |
| 45 | 25199 | 6.348  |
| 46 |       |        |
| 47 | 25205 | 0.936  |
| 48 | 25257 | 0.057  |
| 49 |       |        |
| 50 | 25283 | 0.057  |
| 51 | 25329 | 0.076  |
| 52 |       |        |
| 53 | 25330 | 0.057  |
| 54 | 25341 | 0.045  |
| 55 | 25342 | 0.098  |
| 56 | 25358 | 0.057  |
| 57 | 25361 | 0.076  |
| 58 | 25362 | 0.076  |
| 59 | 25481 | 10.546 |
| 60 | 25514 | 0.057  |

1  
2  
3  
4  
5  
6  
7  
8  
9  
10  
11  
12  
13  
14  
15  
16  
17  
18  
19  
20  
21  
22  
23  
24  
25  
26  
27  
28  
29  
30  
31  
32  
33  
34  
35  
36  
37  
38  
39  
40  
41  
42  
43  
44  
45  
46  
47  
48  
49  
50  
51  
52  
53  
54  
55  
56  
57  
58  
59  
60

|       |        |
|-------|--------|
| 25529 | 0.057  |
| 25619 | 0.048  |
| 25643 | 0.267  |
| 25701 | 0.813  |
| 25750 | 0.045  |
| 25790 | 0.076  |
| 25794 | 0.048  |
| 25800 | 0.936  |
| 25815 | 0.357  |
| 25833 | 1.044  |
| 25895 | 0.058  |
| 26021 | 7.014  |
| 26083 | 1.761  |
| 26095 | 0.048  |
| 26115 | 45.472 |
| 26133 | 0.058  |
| 26159 | 0.061  |
| 26165 | 0.057  |
| 26213 | 0.032  |
| 26216 | 0.098  |
| 26231 | 0.098  |
| 26234 | 0.121  |
| 26242 | 0.045  |
| 26247 | 0.064  |
| 26277 | 0.013  |
| 26283 | 0.046  |
| 26284 | 0.586  |
| 26291 | 0.877  |
| 26336 | 0.792  |
| 26351 | 0.207  |
| 26522 | 0.064  |
| 26575 | 0.161  |
| 26631 | 0.311  |
| 26746 | 0.058  |
| 26888 | 0.311  |
| 26908 | 6.609  |
| 26967 | 0.877  |
| 26970 | 0.936  |
| 26986 | 0.541  |
| 26988 | 0.058  |
| 27008 | 0.037  |
| 27013 | 0.813  |
| 27055 | 0.057  |
| 27058 | 0.371  |
| 27064 | 0.877  |

|    |       |        |
|----|-------|--------|
| 1  |       |        |
| 2  |       |        |
| 3  | 27082 | 0.433  |
| 4  | 27197 | 0.877  |
| 5  |       |        |
| 6  | 27200 | 0.311  |
| 7  | 27362 | 0.311  |
| 8  |       |        |
| 9  | 27366 | 0.098  |
| 10 | 27441 | 0.633  |
| 11 | 27446 | 0.877  |
| 12 | 27452 | 0.058  |
| 13 | 27454 | 0.072  |
| 14 | 27459 | 0.058  |
| 15 |       |        |
| 16 | 27484 | 0.16   |
| 17 |       |        |
| 18 | 27490 | 0.16   |
| 19 | 27591 | 0.406  |
| 20 | 27677 | 0.829  |
| 21 | 27749 | 1.301  |
| 22 | 27778 | 0.036  |
| 23 | 27782 | 0.048  |
| 24 | 27783 | 0.048  |
| 25 | 27784 | 0.058  |
| 26 | 27785 | 0.051  |
| 27 | 27856 | 0.877  |
| 28 | 27968 | 0.048  |
| 29 | 28168 | 0.057  |
| 30 | 28172 | 0.166  |
| 31 | 28189 | 11.573 |
| 32 | 28211 | 0.028  |
| 33 | 28255 | 0.045  |
| 34 | 28256 | 0.057  |
| 35 | 28328 | 0.013  |
| 36 | 28332 | 0.577  |
| 37 | 28344 | 0.058  |
| 38 | 28346 | 0.058  |
| 39 | 28348 | 0.057  |
| 40 | 28390 | 0.076  |
| 41 | 28421 | 0.633  |
| 42 | 28479 | 0.166  |
| 43 | 28553 | 0.057  |
| 44 | 28598 | 0.107  |
| 45 | 28636 | 0.877  |
| 46 | 28695 | 0.121  |
| 47 | 28711 | 4.315  |
| 48 | 28712 | 0.029  |
| 49 | 28713 | 0.34   |
| 50 | 28728 | 0.792  |
| 51 | 28764 | 0.311  |
| 52 |       |        |
| 53 |       |        |
| 54 |       |        |
| 55 |       |        |
| 56 |       |        |
| 57 |       |        |
| 58 |       |        |
| 59 |       |        |
| 60 |       |        |

1  
2  
3  
4  
5  
6  
7  
8  
9  
10  
11  
12  
13  
14  
15  
16  
17  
18  
19  
20  
21  
22  
23  
24  
25  
26  
27  
28  
29  
30  
31  
32  
33  
34  
35  
36  
37  
38  
39  
40  
41  
42  
43  
44  
45  
46  
47  
48  
49  
50  
51  
52  
53  
54  
55  
56  
57  
58  
59  
60

|       |       |
|-------|-------|
| 28780 | 0.041 |
| 28784 | 0.057 |
| 28816 | 0.098 |
| 28878 | 0.877 |
| 28888 | 0.057 |
| 28900 | 0.061 |
| 28955 | 0.058 |
| 29014 | 2.808 |
| 29020 | 1.276 |
| 29037 | 0.311 |
| 29068 | 0.048 |
| 29181 | 0.207 |
| 29232 | 0.061 |
| 29304 | 1.128 |
| 29316 | 0.048 |
| 29324 | 0.473 |
| 29330 | 0.057 |
| 29332 | 0.936 |
| 29342 | 0.058 |
| 29345 | 0.936 |
| 29352 | 0.936 |
| 29373 | 0.057 |
| 29426 | 0.71  |
| 29455 | 0.311 |
| 29465 | 0.307 |
| 29480 | 6.915 |
| 29488 | 0.058 |
| 29500 | 4.315 |
| 29524 | 0.098 |
| 29577 | 7.015 |
| 29587 | 0.048 |
| 29704 | 0.057 |
| 29749 | 0.057 |
| 29772 | 0.813 |
| 29860 | 0.046 |
| 29898 | 0.633 |
| 29951 | 1.343 |
| 30021 | 0.057 |
| 30049 | 15    |
| 30070 | 0.058 |
| 30123 | 0.058 |
| 30164 | 0.166 |
| 30165 | 0.107 |
| 30168 | 0.045 |
| 30243 | 0.057 |

|       |       |
|-------|-------|
| 30252 | 0.633 |
| 30282 | 0.207 |
| 30295 | 0.107 |
| 30297 | 0.057 |
| 30327 | 0.813 |
| 30382 | 0.057 |
| 30389 | 0.023 |
| 30391 | 0.064 |
| 30444 | 0.041 |
| 30514 | 3.028 |
| 30531 | 0.013 |
| 30556 | 0.058 |
| 30698 | 7.562 |
| 30724 | 0.936 |
| 30761 | 0.235 |
| 30790 | 0.207 |
| 30806 | 0.057 |
| 30811 | 0.166 |
| 30849 | 0.207 |
| 30892 | 0.936 |
| 30923 | 0.311 |
| 30942 | 0.057 |
| 30954 | 0.877 |
| 30966 | 0.877 |
| 30982 | 0.098 |
| 30984 | 0.877 |
| 30994 | 0.877 |
| 31033 | 4.315 |
| 31053 | 3.598 |
| 31054 | 0.061 |
| 31064 | 0.577 |
| 31105 | 0.541 |
| 31107 | 0.406 |
| 31151 | 0.058 |
| 31155 | 0.058 |
| 31178 | 0.036 |
| 31196 | 0.058 |
| 31253 | 0.71  |
| 31257 | 0.058 |
| 31383 | 0.207 |
| 31429 | 0.045 |
| 31452 | 0.051 |
| 31469 | 0.098 |
| 31482 | 0.057 |
| 31540 | 5.06  |

1  
2  
3  
4  
5  
6  
7  
8  
9  
10  
11  
12  
13  
14  
15  
16  
17  
18  
19  
20  
21  
22  
23  
24  
25  
26  
27  
28  
29  
30  
31  
32  
33  
34  
35  
36  
37  
38  
39  
40  
41  
42  
43  
44  
45  
46  
47  
48  
49  
50  
51  
52  
53  
54  
55  
56  
57  
58  
59  
60

|       |       |
|-------|-------|
| 31577 | 0.051 |
| 31582 | 0.862 |
| 31584 | 0.862 |
| 31589 | 0.207 |
| 31650 | 4.409 |
| 31700 | 0.038 |
| 31734 | 1.08  |
| 31777 | 0.307 |
| 31787 | 0.207 |
| 31871 | 0.057 |
| 31885 | 0.71  |
| 31894 | 0.057 |
| 31916 | 0.433 |
| 31935 | 0.962 |
| 31943 | 0.051 |
| 31944 | 0.076 |
| 31945 | 0.098 |
| 31950 | 0.057 |
| 31959 | 0.05  |
| 31960 | 4.315 |
| 31962 | 0.813 |
| 32090 | 0.064 |
| 32093 | 0.877 |
| 32097 | 0.076 |
| 32100 | 0.098 |
| 32105 | 0.064 |
| 32108 | 0.076 |
| 32136 | 0.057 |
| 32163 | 0.058 |
| 32165 | 0.046 |
| 32227 | 0.813 |
| 32234 | 0.064 |
| 32237 | 0.013 |
| 32242 | 0.048 |
| 32365 | 0.048 |
| 32366 | 0.057 |
| 32425 | 3.025 |
| 32436 | 0.057 |
| 32439 | 0.036 |
| 32450 | 1.08  |
| 32509 | 0.057 |
| 32519 | 0.877 |
| 32520 | 0.046 |
| 32536 | 0.076 |
| 32554 | 0.877 |

|    |       |       |
|----|-------|-------|
| 1  | 32601 | 0.311 |
| 2  |       |       |
| 3  |       |       |
| 4  | 32626 | 0.877 |
| 5  |       |       |
| 6  | 32641 | 0.061 |
| 7  |       |       |
| 8  | 32688 | 7.562 |
| 9  |       |       |
| 10 | 32692 | 0.058 |
| 11 |       |       |
| 12 | 32766 | 1.236 |
| 13 |       |       |
| 14 | 32831 | 0.71  |
| 15 |       |       |
| 16 | 32839 | 0.058 |
| 17 |       |       |
| 18 | 32854 | 0.207 |
| 19 |       |       |
| 20 | 32862 | 0.936 |
| 21 |       |       |
| 22 | 32875 | 0.048 |
| 23 |       |       |
| 24 | 32891 | 0.877 |
| 25 |       |       |
| 26 | 32897 | 7.562 |
| 27 |       |       |
| 28 | 32916 | 0.207 |
| 29 |       |       |
| 30 | 32926 | 0.041 |
| 31 |       |       |
| 32 | 32970 | 0.058 |
| 33 |       |       |
| 34 | 32993 | 2.107 |
| 35 |       |       |
| 36 | 33060 | 0.058 |
| 37 |       |       |
| 38 | 33068 | 1.128 |
| 39 |       |       |
| 40 | 33090 | 0.032 |
| 41 |       |       |
| 42 | 33104 | 0.058 |
| 43 |       |       |
| 44 | 33111 | 0.045 |
| 45 |       |       |
| 46 | 33113 | 0.05  |
| 47 |       |       |
| 48 | 33133 | 4.409 |
| 49 |       |       |
| 50 | 33180 | 0.813 |
| 51 |       |       |
| 52 | 33260 | 0.057 |
| 53 |       |       |
| 54 | 33318 | 0.05  |
| 55 |       |       |
| 56 | 33321 | 0.05  |
| 57 |       |       |
| 58 | 33340 | 0.877 |
| 59 |       |       |
| 60 | 33357 | 0.057 |
|    |       |       |
|    | 33386 | 0.877 |
|    |       |       |
|    | 33457 | 0.057 |
|    |       |       |
|    | 33475 | 1.7   |
|    |       |       |
|    | 33559 | 0.057 |
|    |       |       |
|    | 33568 | 0.813 |
|    |       |       |
|    | 33589 | 0.048 |
|    |       |       |
|    | 33614 | 0.058 |
|    |       |       |
|    | 33624 | 0.037 |
|    |       |       |
|    | 33643 | 0.058 |
|    |       |       |
|    | 33645 | 0.207 |
|    |       |       |
|    | 33647 | 0.877 |
|    |       |       |
|    | 33653 | 0.058 |
|    |       |       |
|    | 33654 | 0.044 |
|    |       |       |
|    | 33666 | 0.058 |
|    |       |       |
|    | 33669 | 0.057 |



1  
2  
3  
4  
5  
6  
7  
8  
9  
10  
11  
12  
13  
14  
15  
16  
17  
18  
19  
20  
21  
22  
23  
24  
25  
26  
27  
28  
29  
30  
31  
32  
33  
34  
35  
36  
37  
38  
39  
40  
41  
42  
43  
44  
45  
46  
47  
48  
49  
50  
51  
52  
53  
54  
55  
56  
57  
58  
59  
60

|       |       |
|-------|-------|
| 33679 | 0.058 |
| 33687 | 0.877 |
| 33688 | 0.051 |
| 33704 | 0.936 |
| 33710 | 0.058 |
| 33743 | 0.107 |
| 33781 | 4.409 |
| 33785 | 0.057 |
| 33801 | 0.023 |
| 33826 | 0.058 |
| 33832 | 0.013 |
| 33838 | 0.877 |
| 33935 | 0.048 |
| 33961 | 0.051 |
| 33994 | 0.076 |
| 33995 | 0.877 |
| 34008 | 0.044 |
| 34022 | 0.877 |
| 34065 | 0.406 |
| 34073 | 0.633 |
| 34090 | 0.057 |
| 34091 | 0.076 |
| 34107 | 0.037 |
| 34129 | 0.036 |
| 34143 | 0.453 |
| 34152 | 0.057 |
| 34164 | 0.058 |
| 34172 | 0.057 |
| 34176 | 0.057 |
| 34182 | 0.037 |
| 34190 | 0.076 |
| 34197 | 0.036 |
| 34199 | 1.761 |
| 34209 | 0.058 |
| 34212 | 0.207 |
| 34218 | 0.076 |
| 34224 | 0.035 |
| 34229 | 0.058 |
| 34235 | 0.029 |
| 34251 | 0.032 |
| 34257 | 0.058 |
| 34260 | 0.29  |
| 34264 | 0.051 |
| 34266 | 0.029 |
| 34271 | 0.311 |

|    |       |       |
|----|-------|-------|
| 1  |       |       |
| 2  |       |       |
| 3  |       |       |
| 4  | 34274 | 0.037 |
| 5  | 34281 | 0.541 |
| 6  | 34289 | 0.045 |
| 7  | 34290 | 0.045 |
| 8  | 34305 | 0.058 |
| 9  | 34319 | 0.877 |
| 10 | 34348 | 0.038 |
| 11 | 34349 | 0.877 |
| 12 | 34350 | 0.058 |
| 13 | 34354 | 0.057 |
| 14 | 34359 | 0.048 |
| 15 | 34362 | 0.076 |
| 16 | 34373 | 0.057 |
| 17 | 34383 | 0.051 |
| 18 | 34396 | 0.058 |
| 19 | 34397 | 0.877 |
| 20 | 34401 | 0.032 |
| 21 | 34409 | 0.058 |
| 22 | 34422 | 0.046 |
| 23 | 34425 | 0.048 |
| 24 | 34437 | 0.057 |
| 25 | 34438 | 0.023 |
| 26 | 34440 | 0.044 |
| 27 | 34444 | 0.038 |
| 28 | 34447 | 0.057 |
| 29 | 34468 | 0.877 |
| 30 | 34474 | 0.036 |
| 31 | 34477 | 0.633 |
| 32 | 34487 | 0.057 |
| 33 | 34489 | 7.562 |
| 34 | 34495 | 0.058 |
| 35 | 34497 | 0.058 |
| 36 | 34500 | 0.058 |
| 37 | 34503 | 0.036 |
| 38 | 34506 | 0.042 |
| 39 | 34518 | 0.058 |
| 40 | 34521 | 0.046 |
| 41 | 34527 | 0.057 |
| 42 | 34536 | 0.048 |
| 43 | 34546 | 0.877 |
| 44 | 34550 | 0.048 |
| 45 | 34552 | 0.051 |
| 46 | 34554 | 0.877 |
| 47 | 34570 | 0.046 |
| 48 | 34579 | 0.044 |
| 49 |       |       |
| 50 |       |       |
| 51 |       |       |
| 52 |       |       |
| 53 |       |       |
| 54 |       |       |
| 55 |       |       |
| 56 |       |       |
| 57 |       |       |
| 58 |       |       |
| 59 |       |       |
| 60 |       |       |

1  
2  
3  
4  
5  
6  
7  
8  
9  
10  
11  
12  
13  
14  
15  
16  
17  
18  
19  
20  
21  
22  
23  
24  
25  
26  
27  
28  
29  
30  
31  
32  
33  
34  
35  
36  
37  
38  
39  
40  
41  
42  
43  
44  
45  
46  
47  
48  
49  
50  
51  
52  
53  
54  
55  
56  
57  
58  
59  
60

|       |       |
|-------|-------|
| 34595 | 0.064 |
| 34597 | 0.877 |
| 34606 | 0.042 |
| 34610 | 0.098 |
| 34616 | 0.052 |
| 34621 | 0.057 |
| 34634 | 0.037 |
| 34639 | 0.046 |
| 34662 | 0.044 |
| 34663 | 0.936 |
| 34667 | 0.051 |
| 34669 | 0.058 |
| 34670 | 0.045 |
| 34678 | 0.877 |
| 34700 | 0.877 |
| 34716 | 0.072 |
| 34718 | 0.029 |
| 34725 | 0.103 |
| 34729 | 0.048 |
| 34730 | 0.044 |
| 34731 | 0.032 |
| 34737 | 0.041 |
| 34738 | 0.045 |
| 34743 | 0.098 |
| 34744 | 0.311 |
| 34757 | 0.048 |
| 34761 | 0.877 |
| 34769 | 0.098 |
| 34771 | 4.409 |
| 34782 | 0.036 |
| 34784 | 0.058 |
| 34786 | 7.562 |
| 34787 | 7.562 |
| 34789 | 0.051 |
| 34793 | 0.023 |
| 34808 | 0.046 |
| 34815 | 0.058 |
| 34840 | 0.051 |
| 34845 | 0.051 |
| 34850 | 0.098 |
| 34858 | 0.058 |
| 34861 | 0.029 |
| 34865 | 0.058 |
| 34889 | 0.048 |
| 34898 | 0.023 |

|    |       |       |
|----|-------|-------|
| 1  | 34910 | 0.064 |
| 2  | 34911 | 0.057 |
| 3  | 34916 | 0.032 |
| 4  | 34920 | 0.041 |
| 5  | 34922 | 0.098 |
| 6  | 34923 | 0.045 |
| 7  | 34924 | 0.023 |
| 8  | 34931 | 0.057 |
| 9  | 34939 | 0.041 |
| 10 | 34946 | 0.104 |
| 11 | 34954 | 0.058 |
| 12 | 34961 | 0.098 |
| 13 | 34968 | 0.058 |
| 14 | 34977 | 0.098 |
| 15 | 34980 | 0.057 |
| 16 | 35038 | 3.025 |
| 17 | 35085 | 3.025 |
| 18 | 35093 | 4.409 |
| 19 | 35169 | 0.886 |
| 20 | 35170 | 0.378 |
| 21 | 35255 | 4.409 |
| 22 | 35265 | 0.016 |
| 23 | 35269 | 0.492 |
| 24 | 35292 | 0.057 |
| 25 | 35330 | 0.493 |
| 26 | 35341 | 3.025 |
| 27 | 35347 | 0.29  |
| 28 | 35438 | 0.29  |
| 29 | 35506 | 1.128 |
| 30 | 35562 | 6.291 |
| 31 | 35651 | 0.541 |
| 32 | 35653 | 0.517 |
| 33 | 35656 | 0.29  |
| 34 | 35679 | 0.058 |
| 35 | 35681 | 0.378 |
| 36 | 35682 | 0.886 |
| 37 | 35711 | 0.076 |
| 38 | 35749 | 0.061 |
| 39 | 35792 | 0.057 |
| 40 | 35800 | 0.877 |
| 41 | 35806 | 0.29  |
| 42 | 35853 | 0.493 |
| 43 | 35890 | 0.057 |
| 44 | 35893 | 0.311 |
| 45 | 35935 | 0.035 |

1  
2  
3  
4  
5  
6  
7  
8  
9  
10  
11  
12  
13  
14  
15  
16  
17  
18  
19  
20  
21  
22  
23  
24  
25  
26  
27  
28  
29  
30  
31  
32  
33  
34  
35  
36  
37  
38  
39  
40  
41  
42  
43  
44  
45  
46  
47  
48  
49  
50  
51  
52  
53  
54  
55  
56  
57  
58  
59  
60

|       |        |
|-------|--------|
| 35939 | 4.409  |
| 35965 | 0.058  |
| 35967 | 0.877  |
| 35968 | 3.598  |
| 36019 | 0.041  |
| 36035 | 0.792  |
| 36038 | 4.409  |
| 36040 | 11.573 |
| 36152 | 0.877  |
| 36211 | 6.731  |
| 36260 | 0.023  |
| 36329 | 0.061  |
| 36436 | 1.128  |
| 36472 | 0.862  |
| 36486 | 0.311  |
| 36488 | 0.051  |
| 36577 | 0.05   |
| 36597 | 0.057  |
| 36606 | 0.048  |
| 36608 | 0.051  |
| 36650 | 0.057  |
| 36697 | 0.541  |
| 36732 | 0.046  |
| 36754 | 0.058  |
| 36787 | 0.048  |
| 36873 | 0.046  |
| 36929 | 0.877  |
| 36945 | 0.877  |
| 36949 | 0.046  |
| 36993 | 0.051  |
| 36994 | 0.057  |
| 37002 | 0.057  |
| 37020 | 0.406  |
| 37021 | 0.541  |
| 37053 | 0.057  |
| 37094 | 0.057  |
| 37253 | 0.048  |
| 37291 | 0.041  |
| 37411 | 0.877  |
| 37507 | 1.128  |
| 37518 | 1.128  |
| 37553 | 0.048  |
| 37562 | 0.5    |
| 37587 | 0.5    |
| 37648 | 0.048  |

|       |        |
|-------|--------|
| 37688 | 0.603  |
| 37703 | 0.71   |
| 37719 | 11.573 |
| 37731 | 0.057  |
| 37750 | 0.307  |
| 37763 | 0.945  |
| 37779 | 3.598  |
| 37801 | 1.15   |
| 37816 | 0.057  |
| 37831 | 0.29   |
| 37850 | 0.061  |
| 37867 | 0.29   |
| 37904 | 0.058  |
| 37923 | 6.731  |
| 37928 | 2.518  |
| 37954 | 2.518  |
| 37960 | 6.731  |
| 37968 | 6.152  |
| 37972 | 0.061  |
| 37979 | 0.118  |
| 38013 | 0.962  |
| 38031 | 3.598  |
| 38032 | 0.058  |
| 38085 | 0.057  |
| 38088 | 0.057  |
| 38092 | 0.862  |
| 38103 | 0.962  |
| 38183 | 0.493  |
| 38196 | 0.541  |
| 38199 | 4.409  |
| 38293 | 1.15   |
| 38311 | 0.378  |
| 38323 | 0.877  |
| 38326 | 9.402  |
| 38332 | 0.057  |
| 38351 | 9.402  |
| 38363 | 0.057  |
| 38365 | 9.402  |
| 38430 | 0.041  |
| 38493 | 0.057  |
| 38511 | 0.045  |
| 38521 | 0.044  |
| 38527 | 0.061  |
| 38528 | 0.046  |
| 38553 | 11.573 |

1  
2  
3  
4  
5  
6  
7  
8  
9  
10  
11  
12  
13  
14  
15  
16  
17  
18  
19  
20  
21  
22  
23  
24  
25  
26  
27  
28  
29  
30  
31  
32  
33  
34  
35  
36  
37  
38  
39  
40  
41  
42  
43  
44  
45  
46  
47  
48  
49  
50  
51  
52  
53  
54  
55  
56  
57  
58  
59  
60

|       |        |
|-------|--------|
| 38770 | 0.517  |
| 38817 | 0.158  |
| 38827 | 0.032  |
| 38874 | 0.865  |
| 38881 | 0.207  |
| 38943 | 0.877  |
| 38944 | 9.402  |
| 38948 | 0.311  |
| 38950 | 0.058  |
| 38956 | 0.541  |
| 38970 | 0.115  |
| 38976 | 15.077 |
| 38984 | 0.058  |
| 38992 | 0.207  |
| 39019 | 0.138  |
| 39084 | 11.573 |
| 39085 | 0.045  |
| 39104 | 6.915  |
| 39109 | 0.307  |
| 39145 | 0.596  |
| 39180 | 6.731  |
| 39215 | 0.86   |
| 39240 | 1.51   |
| 39251 | 3.598  |
| 39264 | 0.311  |
| 39317 | 0.098  |
| 39333 | 0.058  |
| 39340 | 0.058  |
| 39354 | 0.016  |
| 39362 | 15.077 |
| 39363 | 1.51   |
| 39437 | 0.013  |
| 39461 | 0.057  |
| 39469 | 9.085  |
| 39475 | 0.229  |
| 39477 | 0.229  |
| 39478 | 0.945  |
| 39481 | 0.058  |
| 39498 | 0.945  |
| 39502 | 0.057  |
| 39505 | 0.29   |
| 39518 | 9.085  |
| 39558 | 0.044  |
| 39590 | 6.506  |
| 39629 | 0.877  |

|    |       |       |
|----|-------|-------|
| 1  |       |       |
| 2  |       |       |
| 3  |       |       |
| 4  | 39647 | 0.877 |
| 5  | 39656 | 0.877 |
| 6  | 39693 | 1.291 |
| 7  | 39708 | 0.603 |
| 8  | 39709 | 0.541 |
| 9  | 39722 | 0.158 |
| 10 | 39723 | 9.085 |
| 11 | 39746 | 9.085 |
| 12 | 39750 | 0.406 |
| 13 | 39756 | 6.506 |
| 14 | 39758 | 0.057 |
| 15 | 39798 | 0.29  |
| 16 | 39799 | 6.609 |
| 17 | 39811 | 0.541 |
| 18 | 39823 | 0.057 |
| 19 | 39842 | 0.197 |
| 20 | 39873 | 0.048 |
| 21 | 39876 | 0.603 |
| 22 | 39929 | 6.506 |
| 23 | 39934 | 0.058 |
| 24 | 39940 | 0.058 |
| 25 | 39987 | 7.04  |
| 26 | 40018 | 6.506 |
| 27 | 40058 | 0.29  |
| 28 | 40060 | 0.541 |
| 29 | 40061 | 0.406 |
| 30 | 40083 | 0.057 |
| 31 | 40086 | 0.057 |
| 32 | 40098 | 7.04  |
| 33 | 40107 | 0.058 |
| 34 | 40128 | 7.04  |
| 35 | 40141 | 0.433 |
| 36 | 40158 | 0.058 |
| 37 | 40159 | 0.107 |
| 38 | 40166 | 0.046 |
| 39 | 40185 | 0.813 |
| 40 | 40211 | 0.378 |
| 41 | 40212 | 0.886 |
| 42 | 40215 | 0.433 |
| 43 | 40239 | 0.962 |
| 44 | 40249 | 0.29  |
| 45 | 40253 | 0.098 |
| 46 | 40254 | 0.046 |
| 47 | 40336 | 0.135 |
| 48 | 40385 | 0.058 |
| 49 |       |       |
| 50 |       |       |
| 51 |       |       |
| 52 |       |       |
| 53 |       |       |
| 54 |       |       |
| 55 |       |       |
| 56 |       |       |
| 57 |       |       |
| 58 |       |       |
| 59 |       |       |
| 60 |       |       |



1  
2  
3  
4  
5  
6  
7  
8  
9  
10  
11  
12  
13  
14  
15  
16  
17  
18  
19  
20  
21  
22  
23  
24  
25  
26  
27  
28  
29  
30  
31  
32  
33  
34  
35  
36  
37  
38  
39  
40  
41  
42  
43  
44  
45  
46  
47  
48  
49  
50  
51  
52  
53  
54  
55  
56  
57  
58  
59  
60

|       |        |
|-------|--------|
| 40394 | 0.048  |
| 40396 | 0.037  |
| 40401 | 0.045  |
| 40422 | 0.041  |
| 40434 | 6.348  |
| 40473 | 0.492  |
| 40484 | 0.433  |
| 40508 | 6.348  |
| 40516 | 0.057  |
| 40563 | 0.192  |
| 40576 | 7.04   |
| 40616 | 1.928  |
| 40645 | 1.928  |
| 40662 | 0.058  |
| 40663 | 0.051  |
| 40664 | 0.488  |
| 40688 | 3.025  |
| 40718 | 0.046  |
| 40752 | 3.025  |
| 40756 | 0.076  |
| 40785 | 1.93   |
| 40805 | 0.406  |
| 40883 | 0.406  |
| 40926 | 0.406  |
| 40940 | 4.995  |
| 40957 | 6.609  |
| 40961 | 1.93   |
| 41135 | 74.044 |
| 41161 | 9.402  |
| 41214 | 0.057  |
| 41259 | 0.051  |
| 41275 | 0.058  |
| 41276 | 0.058  |
| 41278 | 0.041  |
| 41286 | 4.995  |
| 41348 | 6.348  |
| 41364 | 0.433  |
| 41365 | 0.813  |
| 41366 | 0.433  |
| 41367 | 0.813  |
| 41407 | 0.877  |
| 41409 | 0.058  |
| 41414 | 0.029  |
| 41416 | 0.128  |
| 41450 | 0.433  |

|    |       |        |
|----|-------|--------|
| 1  | 41513 | 0.057  |
| 2  |       |        |
| 3  | 41521 | 0.061  |
| 4  |       |        |
| 5  | 41523 | 0.057  |
| 6  |       |        |
| 7  | 41524 | 0.064  |
| 8  |       |        |
| 9  | 41535 | 0.051  |
| 10 | 41550 | 0.71   |
| 11 | 41599 | 0.038  |
| 12 |       |        |
| 13 | 41608 | 0.013  |
| 14 | 41615 | 0.05   |
| 15 | 41621 | 0.307  |
| 16 |       |        |
| 17 | 41622 | 0.121  |
| 18 | 41623 | 0.307  |
| 19 | 41624 | 0.121  |
| 20 | 41668 | 0.166  |
| 21 |       |        |
| 22 | 41673 | 0.046  |
| 23 | 41674 | 0.166  |
| 24 |       |        |
| 25 | 41677 | 0.023  |
| 26 | 41680 | 0.029  |
| 27 | 41682 | 0.051  |
| 28 | 41701 | 0.098  |
| 29 |       |        |
| 30 | 41720 | 0.013  |
| 31 | 41722 | 7.562  |
| 32 | 41729 | 0.036  |
| 33 |       |        |
| 34 | 41817 | 0.076  |
| 35 | 41823 | 0.076  |
| 36 | 41974 | 4.409  |
| 37 |       |        |
| 38 | 41976 | 0.29   |
| 39 | 42003 | 0.076  |
| 40 |       |        |
| 41 | 42021 | 11.573 |
| 42 | 42074 | 0.396  |
| 43 | 42078 | 0.036  |
| 44 | 42094 | 0.862  |
| 45 | 42101 | 1.236  |
| 46 | 42108 | 0.057  |
| 47 |       |        |
| 48 | 42125 | 0.029  |
| 49 |       |        |
| 50 | 42201 | 0.058  |
| 51 | 42208 | 0.044  |
| 52 |       |        |
| 53 | 42213 | 0.058  |
| 54 | 42218 | 0.057  |
| 55 | 42280 | 0.155  |
| 56 |       |        |
| 57 | 42332 | 0.155  |
| 58 | 42345 | 0.877  |
| 59 | 42371 | 1.343  |
| 60 | 42380 | 0.046  |
|    | 42394 | 0.036  |

1  
2  
3  
4  
5  
6  
7  
8  
9  
10  
11  
12  
13  
14  
15  
16  
17  
18  
19  
20  
21  
22  
23  
24  
25  
26  
27  
28  
29  
30  
31  
32  
33  
34  
35  
36  
37  
38  
39  
40  
41  
42  
43  
44  
45  
46  
47  
48  
49  
50  
51  
52  
53  
54  
55  
56  
57  
58  
59  
60

|       |       |
|-------|-------|
| 42397 | 0.057 |
| 42399 | 6.609 |
| 42406 | 0.057 |
| 42455 | 0.311 |
| 42500 | 0.433 |
| 42514 | 0.877 |
| 42538 | 6.348 |
| 42576 | 9.402 |
| 42590 | 9.402 |
| 42591 | 3.598 |
| 42604 | 0.577 |
| 42706 | 0.058 |
| 42708 | 0.458 |
| 42791 | 0.051 |
| 42792 | 0.057 |
| 42793 | 0.311 |
| 42798 | 0.406 |
| 42821 | 0.153 |
| 42834 | 1.343 |
| 42905 | 0.207 |
| 42913 | 7.562 |
| 42915 | 0.877 |
| 43028 | 0.877 |
| 43032 | 0.057 |
| 43045 | 0.057 |
| 43089 | 9.085 |
| 43096 | 0.061 |
| 43152 | 6.731 |
| 43198 | 0.046 |
| 43199 | 0.877 |
| 43233 | 0.058 |
| 43238 | 0.051 |
| 43244 | 0.051 |
| 43252 | 0.058 |
| 43260 | 0.914 |
| 43315 | 0.939 |
| 43414 | 0.058 |
| 43426 | 0.061 |
| 43441 | 0.041 |
| 43447 | 0.877 |
| 43456 | 0.048 |
| 43479 | 0.058 |
| 43504 | 0.057 |
| 43513 | 0.046 |
| 43536 | 0.877 |

|    |       |       |
|----|-------|-------|
| 1  |       |       |
| 2  |       |       |
| 3  |       |       |
| 4  | 43541 | 0.121 |
| 5  | 43550 | 0.038 |
| 6  | 43554 | 0.877 |
| 7  | 43616 | 0.539 |
| 8  | 43617 | 6.506 |
| 9  | 43652 | 0.586 |
| 10 | 43657 | 1.276 |
| 11 | 43766 | 0.057 |
| 12 | 43812 | 0.493 |
| 13 | 43891 | 0.877 |
| 14 | 43904 | 0.057 |
| 15 | 43911 | 0.098 |
| 16 | 44022 | 0.386 |
| 17 | 44112 | 0.158 |
| 18 | 44159 | 0.058 |
| 19 | 44187 | 0.104 |
| 20 | 44210 | 0.058 |
| 21 | 44232 | 210   |
| 22 | 44233 | 0.016 |
| 23 | 44258 | 0.877 |
| 24 | 44261 | 0.386 |
| 25 | 44313 | 0.061 |
| 26 | 44371 | 0.406 |
| 27 | 44483 | 0.048 |
| 28 | 44487 | 2.518 |
| 29 | 44703 | 0.121 |
| 30 | 44730 | 0.061 |
| 31 | 44800 | 0.098 |
| 32 | 44837 | 6.731 |
| 33 | 44867 | 0.862 |
| 34 | 44924 | 0.051 |
| 35 | 44986 | 0.098 |
| 36 | 45092 | 6.506 |
| 37 | 45145 | 0.061 |
| 38 | 45213 | 1.225 |
| 39 | 45216 | 0.048 |
| 40 | 45231 | 0.877 |
| 41 | 45233 | 0.032 |
| 42 | 45242 | 0.032 |
| 43 | 45256 | 0.061 |
| 44 | 45259 | 0.058 |
| 45 | 45262 | 0.453 |
| 46 | 45276 | 0.877 |
| 47 | 45298 | 0.058 |
| 48 | 45320 | 0.057 |
| 49 |       |       |
| 50 |       |       |
| 51 |       |       |
| 52 |       |       |
| 53 |       |       |
| 54 |       |       |
| 55 |       |       |
| 56 |       |       |
| 57 |       |       |
| 58 |       |       |
| 59 |       |       |
| 60 |       |       |

1  
2  
3  
4  
5  
6  
7  
8  
9  
10  
11  
12  
13  
14  
15  
16  
17  
18  
19  
20  
21  
22  
23  
24  
25  
26  
27  
28  
29  
30  
31  
32  
33  
34  
35  
36  
37  
38  
39  
40  
41  
42  
43  
44  
45  
46  
47  
48  
49  
50  
51  
52  
53  
54  
55  
56  
57  
58  
59  
60

|       |        |
|-------|--------|
| 45325 | 0.458  |
| 45331 | 0.057  |
| 45348 | 0.029  |
| 45349 | 2.107  |
| 45439 | 9.085  |
| 45460 | 11.573 |
| 45549 | 3.598  |
| 45598 | 74.044 |
| 45645 | 0.029  |
| 45649 | 0.029  |
| 45736 | 0.371  |
| 45745 | 1.361  |
| 45766 | 2.723  |
| 45788 | 0.681  |
| 45790 | 0.681  |
| 45800 | 1.779  |
| 45811 | 0.445  |
| 45814 | 0.158  |
| 45827 | 1.361  |
| 45830 | 5.447  |
| 45842 | 0.098  |
| 45894 | 9.085  |
| 45929 | 2.723  |
| 45936 | 0.445  |
| 45982 | 0.445  |
| 46018 | 0.89   |
| 46019 | 1.334  |
| 46020 | 0.89   |
| 46021 | 0.445  |
| 46022 | 0.667  |
| 46141 | 0.057  |
| 46159 | 1.334  |
| 46187 | 5.447  |
| 46279 | 0.541  |
| 46342 | 0.016  |
| 46354 | 7.04   |
| 46440 | 0.098  |
| 46461 | 0.667  |
| 46511 | 0.058  |
| 46544 | 0.058  |
| 46555 | 6.609  |
| 46559 | 2.518  |
| 46560 | 6.731  |
| 46578 | 1.128  |
| 46587 | 0.29   |

|    |       |        |
|----|-------|--------|
| 1  |       |        |
| 2  |       |        |
| 3  | 46633 | 0.058  |
| 4  | 46638 | 0.057  |
| 5  |       |        |
| 6  | 46643 | 0.406  |
| 7  | 46657 | 9.402  |
| 8  |       |        |
| 9  | 46658 | 11.573 |
| 10 | 46659 | 1.779  |
| 11 | 46729 | 0.058  |
| 12 |       |        |
| 13 | 46733 | 3.598  |
| 14 | 46763 | 0.877  |
| 15 | 46801 | 0.035  |
| 16 | 46818 | 0.035  |
| 17 | 46844 | 0.207  |
| 18 | 46846 | 0.058  |
| 19 | 46848 | 0.098  |
| 20 | 46860 | 0.057  |
| 21 | 46898 | 0.058  |
| 22 | 46904 | 0.058  |
| 23 | 46906 | 0.058  |
| 24 | 46919 | 0.813  |
| 25 | 46920 | 0.813  |
| 26 | 46921 | 0.048  |
| 27 | 46925 | 0.057  |
| 28 | 46940 | 0.433  |
| 29 | 46942 | 0.098  |
| 30 | 46967 | 0.023  |
| 31 | 46968 | 0.023  |
| 32 | 46970 | 0.037  |
| 33 | 46987 | 0.038  |
| 34 | 47003 | 0.128  |
| 35 | 47071 | 0.041  |
| 36 | 47072 | 45.472 |
| 37 | 47081 | 0.057  |
| 38 | 47116 | 0.058  |
| 39 | 47154 | 1.276  |
| 40 | 47200 | 0.877  |
| 41 | 47211 | 0.058  |
| 42 | 47350 | 0.603  |
| 43 | 47399 | 2.224  |
| 44 | 47401 | 0.061  |
| 45 | 47413 | 9.402  |
| 46 | 47460 | 2.224  |
| 47 | 47501 | 0.207  |
| 48 | 47508 | 0.058  |
| 49 | 47555 | 4.409  |
| 50 | 47579 | 0.042  |
| 51 |       |        |
| 52 |       |        |
| 53 |       |        |
| 54 |       |        |
| 55 |       |        |
| 56 |       |        |
| 57 |       |        |
| 58 |       |        |
| 59 |       |        |
| 60 |       |        |

1  
2  
3  
4  
5  
6  
7  
8  
9  
10  
11  
12  
13  
14  
15  
16  
17  
18  
19  
20  
21  
22  
23  
24  
25  
26  
27  
28  
29  
30  
31  
32  
33  
34  
35  
36  
37  
38  
39  
40  
41  
42  
43  
44  
45  
46  
47  
48  
49  
50  
51  
52  
53  
54  
55  
56  
57  
58  
59  
60

|       |       |
|-------|-------|
| 47671 | 7.562 |
| 47672 | 7.562 |
| 47706 | 0.013 |
| 47753 | 0.787 |
| 47759 | 7.04  |
| 47816 | 0.577 |
| 47820 | 0.076 |
| 47834 | 0.058 |
| 47847 | 0.051 |
| 47854 | 0.046 |
| 47867 | 1.301 |
| 47919 | 0.038 |
| 47949 | 1.041 |
| 47952 | 0.051 |
| 47985 | 0.046 |
| 47994 | 0.045 |
| 48004 | 0.051 |
| 48035 | 0.072 |
| 48059 | 0.057 |
| 48060 | 0.072 |
| 48062 | 0.057 |
| 48064 | 6.291 |
| 48065 | 0.035 |
| 48066 | 0.057 |
| 48071 | 0.052 |
| 48084 | 0.936 |
| 48090 | 0.541 |
| 48128 | 0.71  |
| 48129 | 0.877 |
| 48133 | 0.044 |
| 48136 | 0.038 |
| 48138 | 0.057 |
| 48148 | 0.71  |
| 48153 | 0.128 |
| 48157 | 0.877 |
| 48158 | 7.562 |
| 48161 | 0.098 |
| 48178 | 0.058 |
| 48183 | 0.493 |
| 48216 | 0.95  |
| 48218 | 0.311 |
| 48253 | 1.15  |
| 48259 | 7.562 |
| 48295 | 0.877 |
| 48301 | 0.877 |

|    |       |       |
|----|-------|-------|
| 1  |       |       |
| 2  |       |       |
| 3  | 48311 | 0.051 |
| 4  | 48326 | 0.936 |
| 5  |       |       |
| 6  | 48330 | 0.877 |
| 7  | 48354 | 0.877 |
| 8  | 48413 | 7.562 |
| 9  | 48434 | 7.562 |
| 10 | 48444 | 0.877 |
| 11 | 48483 | 7.562 |
| 12 | 48526 | 1.343 |
| 13 | 48535 | 0.058 |
| 14 | 48546 | 0.048 |
| 15 | 48561 | 0.877 |
| 16 | 48562 | 0.936 |
| 17 | 48568 | 0.057 |
| 18 | 48571 | 6.731 |
| 19 | 48597 | 0.058 |
| 20 | 48604 | 4.409 |
| 21 | 48622 | 0.877 |
| 22 | 48644 | 0.048 |
| 23 | 48675 | 0.061 |
| 24 | 48738 | 0.936 |
| 25 | 48775 | 0.051 |
| 26 | 48810 | 0.023 |
| 27 | 48816 | 0.877 |
| 28 | 48871 | 0.076 |
| 29 | 48880 | 7.562 |
| 30 | 48913 | 7.562 |
| 31 | 48964 | 0.057 |
| 32 | 49059 | 0.057 |
| 33 | 49096 | 0.058 |
| 34 | 49105 | 0.058 |
| 35 | 49132 | 0.603 |
| 36 | 49133 | 0.936 |
| 37 | 49219 | 0.877 |
| 38 | 49266 | 0.936 |
| 39 | 49277 | 0.057 |
| 40 | 49314 | 0.877 |
| 41 | 49323 | 0.406 |
| 42 | 49324 | 0.29  |
| 43 | 49395 | 8.77  |
| 44 | 49417 | 0.058 |
| 45 | 49432 | 0.936 |
| 46 | 49524 | 0.877 |
| 47 | 49575 | 0.058 |
| 48 | 49742 | 0.229 |
| 49 |       |       |
| 50 |       |       |
| 51 |       |       |
| 52 |       |       |
| 53 |       |       |
| 54 |       |       |
| 55 |       |       |
| 56 |       |       |
| 57 |       |       |
| 58 |       |       |
| 59 |       |       |
| 60 |       |       |



1  
2  
3  
4  
5  
6  
7  
8  
9  
10  
11  
12  
13  
14  
15  
16  
17  
18  
19  
20  
21  
22  
23  
24  
25  
26  
27  
28  
29  
30  
31  
32  
33  
34  
35  
36  
37  
38  
39  
40  
41  
42  
43  
44  
45  
46  
47  
48  
49  
50  
51  
52  
53  
54  
55  
56  
57  
58  
59  
60

|       |       |
|-------|-------|
| 49787 | 0.945 |
| 49788 | 0.603 |
| 49791 | 3.025 |
| 49849 | 0.058 |
| 49862 | 0.603 |
| 49940 | 0.229 |
| 49976 | 4.409 |
| 50058 | 0.057 |
| 50059 | 0.359 |
| 50095 | 0.229 |
| 50117 | 0.936 |
| 50166 | 0.877 |
| 50232 | 0.877 |
| 50266 | 0.057 |
| 50269 | 0.207 |
| 50314 | 0.098 |
| 50317 | 0.207 |
| 50343 | 0.052 |
| 50363 | 0.936 |
| 50380 | 0.378 |
| 50421 | 0.038 |
| 50428 | 5.06  |
| 50468 | 0.038 |
| 50482 | 0.058 |
| 50504 | 0.058 |
| 50513 | 4.409 |
| 50532 | 0.044 |
| 50602 | 0.057 |
| 50628 | 0.048 |
| 50652 | 0.936 |
| 50659 | 0.128 |
| 50671 | 2.518 |
| 50726 | 3.025 |
| 50733 | 0.461 |
| 50785 | 0.057 |
| 50813 | 0.061 |
| 50862 | 0.541 |
| 50881 | 0.058 |
| 50929 | 2.518 |
| 50947 | 0.29  |
| 51084 | 0.051 |
| 51099 | 0.057 |
| 51118 | 0.072 |
| 51235 | 3.598 |
| 51237 | 0.603 |

|    |       |       |
|----|-------|-------|
| 1  | 51242 | 0.098 |
| 2  |       |       |
| 3  | 51284 | 0.718 |
| 4  |       |       |
| 5  | 51293 | 0.057 |
| 6  |       |       |
| 7  | 51327 | 0.051 |
| 8  |       |       |
| 9  | 51339 | 0.061 |
| 10 |       |       |
| 11 | 51343 | 0.076 |
| 12 |       |       |
| 13 | 51360 | 0.045 |
| 14 |       |       |
| 15 | 51381 | 0.058 |
| 16 |       |       |
| 17 | 51384 | 0.945 |
| 18 |       |       |
| 19 | 51595 | 0.877 |
| 20 |       |       |
| 21 | 51611 | 3.025 |
| 22 |       |       |
| 23 | 51614 | 0.057 |
| 24 |       |       |
| 25 | 51644 | 0.051 |
| 26 |       |       |
| 27 | 51769 | 0.936 |
| 28 |       |       |
| 29 | 51789 | 0.461 |
| 30 |       |       |
| 31 | 51808 | 0.424 |
| 32 |       |       |
| 33 | 51819 | 0.058 |
| 34 |       |       |
| 35 | 51827 | 0.064 |
| 36 |       |       |
| 37 | 51828 | 0.936 |
| 38 |       |       |
| 39 | 51829 | 0.045 |
| 40 |       |       |
| 41 | 51896 | 3.578 |
| 42 |       |       |
| 43 | 51923 | 0.061 |
| 44 |       |       |
| 45 | 51937 | 0.038 |
| 46 |       |       |
| 47 | 51943 | 0.936 |
| 48 |       |       |
| 49 | 52009 | 0.057 |
| 50 |       |       |
| 51 | 52085 | 0.051 |
| 52 |       |       |
| 53 | 52141 | 0.061 |
| 54 |       |       |
| 55 | 52154 | 0.057 |
| 56 |       |       |
| 57 | 52178 | 0.493 |
| 58 |       |       |
| 59 | 52216 | 0.229 |
| 60 |       |       |
|    | 52217 | 0.461 |
|    |       |       |
|    | 52220 | 1.93  |
|    |       |       |
|    | 52229 | 0.603 |
|    |       |       |
|    | 52338 | 0.057 |
|    |       |       |
|    | 52389 | 0.057 |
|    |       |       |
|    | 52400 | 0.71  |
|    |       |       |
|    | 52420 | 0.359 |
|    |       |       |
|    | 52455 | 0.877 |
|    |       |       |
|    | 52495 | 0.046 |
|    |       |       |
|    | 52509 | 6.291 |
|    |       |       |
|    | 52547 | 1.15  |
|    |       |       |
|    | 52592 | 0.461 |
|    |       |       |
|    | 52605 | 0.046 |
|    |       |       |
|    | 52617 | 0.936 |
|    |       |       |
|    | 52714 | 0.517 |

1  
2  
3  
4  
5  
6  
7  
8  
9  
10  
11  
12  
13  
14  
15  
16  
17  
18  
19  
20  
21  
22  
23  
24  
25  
26  
27  
28  
29  
30  
31  
32  
33  
34  
35  
36  
37  
38  
39  
40  
41  
42  
43  
44  
45  
46  
47  
48  
49  
50  
51  
52  
53  
54  
55  
56  
57  
58  
59  
60

|       |        |
|-------|--------|
| 52785 | 6.915  |
| 52809 | 0.461  |
| 52856 | 0.057  |
| 52867 | 0.032  |
| 52888 | 0.038  |
| 52889 | 0.057  |
| 52929 | 0.038  |
| 52931 | 0.098  |
| 52948 | 0.877  |
| 52956 | 0.603  |
| 52966 | 0.058  |
| 52977 | 0.29   |
| 53062 | 17.128 |
| 53079 | 0.041  |
| 53106 | 4.409  |
| 53113 | 0.461  |
| 53116 | 0.945  |
| 53164 | 0.076  |
| 53181 | 7.562  |
| 53208 | 0.877  |
| 53287 | 0.051  |
| 53296 | 0.072  |
| 53331 | 0.936  |
| 53345 | 0.057  |
| 53384 | 0.057  |
| 53397 | 0.936  |
| 53417 | 7.562  |
| 53576 | 0.861  |
| 53600 | 0.128  |
| 53604 | 0.057  |
| 53617 | 0.057  |
| 53626 | 0.098  |
| 53639 | 0.046  |
| 53679 | 0.051  |
| 53700 | 0.045  |
| 53702 | 0.051  |
| 53709 | 0.962  |
| 53784 | 0.357  |
| 53803 | 0.057  |
| 53918 | 4.409  |
| 53929 | 0.71   |
| 53952 | 0.058  |
| 53961 | 1.236  |
| 53980 | 0.045  |
| 53999 | 0.128  |

|    |       |        |
|----|-------|--------|
| 1  |       |        |
| 2  |       |        |
| 3  |       |        |
| 4  | 54017 | 0.633  |
| 5  | 54021 | 0.311  |
| 6  | 54023 | 0.046  |
| 7  | 54063 | 42.859 |
| 8  | 54075 | 0.057  |
| 9  | 54085 | 0.962  |
| 10 | 54137 | 0.048  |
| 11 | 54179 | 0.058  |
| 12 | 54304 | 0.098  |
| 13 | 54353 | 0.877  |
| 14 | 54354 | 0.044  |
| 15 | 54406 | 0.192  |
| 16 | 54463 | 0.057  |
| 17 | 54476 | 0.098  |
| 18 | 54484 | 6.291  |
| 19 | 54514 | 0.048  |
| 20 | 54518 | 0.057  |
| 21 | 54520 | 0.633  |
| 22 | 54660 | 0.424  |
| 23 | 54694 | 3.578  |
| 24 | 54713 | 0.058  |
| 25 | 54783 | 0.045  |
| 26 | 54790 | 0.962  |
| 27 | 54806 | 5.928  |
| 28 | 54853 | 0.877  |
| 29 | 54870 | 0.052  |
| 30 | 54877 | 0.036  |
| 31 | 54906 | 1.225  |
| 32 | 54979 | 6.731  |
| 33 | 55009 | 0.098  |
| 34 | 55044 | 0.051  |
| 35 | 55052 | 0.5    |
| 36 | 55099 | 0.311  |
| 37 | 55129 | 0.058  |
| 38 | 55139 | 0.036  |
| 39 | 55153 | 0.048  |
| 40 | 55206 | 0.262  |
| 41 | 55221 | 7.562  |
| 42 | 55233 | 0.048  |
| 43 | 55245 | 0.877  |
| 44 | 55309 | 0.038  |
| 45 | 55313 | 0.048  |
| 46 | 55418 | 0.058  |
| 47 | 55425 | 0.107  |
| 48 | 55434 | 0.048  |
| 49 |       |        |
| 50 |       |        |
| 51 |       |        |
| 52 |       |        |
| 53 |       |        |
| 54 |       |        |
| 55 |       |        |
| 56 |       |        |
| 57 |       |        |
| 58 |       |        |
| 59 |       |        |
| 60 |       |        |

1  
2  
3  
4  
5  
6  
7  
8  
9  
10  
11  
12  
13  
14  
15  
16  
17  
18  
19  
20  
21  
22  
23  
24  
25  
26  
27  
28  
29  
30  
31  
32  
33  
34  
35  
36  
37  
38  
39  
40  
41  
42  
43  
44  
45  
46  
47  
48  
49  
50  
51  
52  
53  
54  
55  
56  
57  
58  
59  
60

|       |        |
|-------|--------|
| 55454 | 0.098  |
| 55465 | 0.051  |
| 55486 | 0.098  |
| 55491 | 0.032  |
| 55505 | 0.045  |
| 55530 | 0.041  |
| 55535 | 0.072  |
| 55582 | 0.718  |
| 55624 | 0.072  |
| 55752 | 11.573 |
| 55817 | 0.877  |
| 55825 | 0.013  |
| 55832 | 4.409  |
| 55839 | 0.458  |
| 55852 | 0.458  |
| 55894 | 0.098  |
| 55913 | 0.057  |
| 55970 | 0.596  |
| 56006 | 0.058  |
| 56022 | 0.962  |
| 56039 | 0.098  |
| 56046 | 0.058  |
| 56071 | 0.603  |
| 56078 | 0.311  |
| 56106 | 0.453  |
| 56171 | 0.051  |
| 56178 | 2.37   |
| 56202 | 10.546 |
| 56205 | 0.058  |
| 56213 | 0.048  |
| 56266 | 0.051  |
| 56275 | 0.035  |
| 56282 | 0.603  |
| 56340 | 0.051  |
| 56441 | 0.936  |
| 56461 | 0.051  |
| 56491 | 0.541  |
| 56549 | 0.058  |
| 56554 | 0.453  |
| 56558 | 0.603  |
| 56559 | 0.051  |
| 56565 | 0.038  |
| 56566 | 0.058  |
| 56584 | 0.718  |
| 56651 | 0.052  |

|       |       |
|-------|-------|
| 56665 | 0.461 |
| 56670 | 3.598 |
| 56671 | 4.4   |
| 56688 | 6.291 |
| 56762 | 0.453 |
| 56788 | 0.633 |
| 56817 | 0.038 |
| 56898 | 0.207 |
| 56925 | 0.045 |
| 56945 | 0.058 |
| 57006 | 0.076 |
| 57007 | 0.023 |
| 57027 | 0.962 |
| 57033 | 0.461 |
| 57045 | 0.057 |
| 57052 | 0.945 |
| 57097 | 0.051 |
| 57107 | 0.032 |
| 57112 | 0.048 |
| 57120 | 0.042 |
| 57139 | 0.59  |
| 57162 | 0.057 |
| 57197 | 0.041 |
| 57297 | 0.064 |
| 57353 | 0.051 |
| 57370 | 0.045 |
| 57381 | 0.128 |
| 57433 | 0.058 |
| 57454 | 0.886 |
| 57465 | 0.058 |
| 57475 | 0.035 |
| 57487 | 0.051 |
| 57523 | 0.052 |
| 57527 | 0.072 |
| 57545 | 0.603 |
| 57623 | 4.409 |
| 57649 | 0.072 |
| 57650 | 0.058 |
| 57750 | 4.409 |
| 57752 | 0.057 |
| 57839 | 0.038 |
| 57865 | 0.051 |
| 57900 | 0.051 |
| 57929 | 0.058 |
| 57943 | 0.813 |

1  
2  
3  
4  
5  
6  
7  
8  
9  
10  
11  
12  
13  
14  
15  
16  
17  
18  
19  
20  
21  
22  
23  
24  
25  
26  
27  
28  
29  
30  
31  
32  
33  
34  
35  
36  
37  
38  
39  
40  
41  
42  
43  
44  
45  
46  
47  
48  
49  
50  
51  
52  
53  
54  
55  
56  
57  
58  
59  
60

|       |       |
|-------|-------|
| 57972 | 0.032 |
| 58039 | 1.928 |
| 58048 | 0.057 |
| 58071 | 0.057 |
| 58114 | 0.945 |
| 58129 | 0.29  |
| 58190 | 0.71  |
| 58213 | 0.098 |
| 58217 | 0.229 |
| 58221 | 0.045 |
| 58248 | 6.291 |
| 58273 | 0.378 |
| 58279 | 0.235 |
| 58288 | 0.051 |
| 58290 | 0.046 |
| 58298 | 0.052 |
| 58316 | 0.046 |
| 58382 | 0.042 |
| 58383 | 0.05  |
| 58415 | 0.057 |
| 58472 | 0.357 |
| 58493 | 0.945 |
| 58499 | 4.315 |
| 58501 | 0.051 |
| 58523 | 0.05  |
| 58526 | 0.058 |
| 58572 | 0.076 |
| 58582 | 0.058 |
| 58636 | 0.058 |
| 58652 | 0.098 |
| 58708 | 0.098 |
| 58710 | 15    |
| 58737 | 0.962 |
| 58743 | 0.058 |
| 58766 | 7.888 |
| 58842 | 0.207 |
| 58848 | 0.058 |
| 58853 | 0.461 |
| 58855 | 0.051 |
| 58888 | 0.061 |
| 58960 | 0.042 |
| 59057 | 7.04  |
| 59067 | 0.057 |
| 59131 | 0.058 |
| 59147 | 0.104 |

|       |       |
|-------|-------|
| 59161 | 0.032 |
| 59203 | 0.936 |
| 59246 | 0.098 |
| 59289 | 0.311 |
| 59392 | 7.9   |
| 59442 | 0.051 |
| 59473 | 5.928 |
| 59479 | 0.051 |
| 59490 | 3.092 |
| 59553 | 0.057 |
| 59562 | 0.098 |
| 59584 | 0.633 |
| 59595 | 0.057 |
| 59599 | 0.058 |
| 59618 | 3.95  |
| 59678 | 0.493 |
| 59705 | 0.058 |
| 59820 | 0.032 |
| 59865 | 0.461 |
| 59878 | 0.045 |
| 59880 | 0.207 |
| 59970 | 0.378 |
| 59978 | 0.044 |
| 59986 | 0.051 |
| 59989 | 0.044 |
| 60035 | 0.057 |
| 60053 | 0.101 |

Source: BNF unit costs (2013 UK pounds). Available online: [http://www.bnf.org/bnf/org\\_450080.htm](http://www.bnf.org/bnf/org_450080.htm).

Note(1): Product code descriptions available from <https://www.cprd.com/ObservationalData/CodedData.asp#DrugsinPrimarycare>.



STROBE Statement—Checklist of items that should be included in reports of *cohort studies*

|                              | Item No | Recommendation                                                                                                                                                                                                                                                                                                                                                                                                                                                                                                 |
|------------------------------|---------|----------------------------------------------------------------------------------------------------------------------------------------------------------------------------------------------------------------------------------------------------------------------------------------------------------------------------------------------------------------------------------------------------------------------------------------------------------------------------------------------------------------|
| <b>Title and abstract</b>    | 1       | (a) Indicate the study's design with a commonly used term in the title or the abstract <b>[See the title, page 1, and 'design' section of the abstract, page 2]</b><br>(b) Provide in the abstract an informative and balanced summary of what was done and what was found <b>[See 'primary and secondary outcome measures' and 'results' sections of abstract, page 2]</b>                                                                                                                                    |
| <b>Introduction</b>          |         |                                                                                                                                                                                                                                                                                                                                                                                                                                                                                                                |
| Background/rationale         | 2       | Explain the scientific background and rationale for the investigation being reported <b>[See 'introduction' section, page 4]</b>                                                                                                                                                                                                                                                                                                                                                                               |
| Objectives                   | 3       | State specific objectives, including any prespecified hypotheses <b>[See final paragraph of 'introduction' section, page 4]</b>                                                                                                                                                                                                                                                                                                                                                                                |
| <b>Methods</b>               |         |                                                                                                                                                                                                                                                                                                                                                                                                                                                                                                                |
| Study design                 | 4       | Present key elements of study design early in the paper <b>[pages 4-7]</b>                                                                                                                                                                                                                                                                                                                                                                                                                                     |
| Setting                      | 5       | Describe the setting, locations, and relevant dates, including periods of recruitment, exposure, follow-up, and data collection <b>[pages 4-5]</b>                                                                                                                                                                                                                                                                                                                                                             |
| Participants                 | 6       | (a) Give the eligibility criteria, and the sources and methods of selection of participants. Describe methods of follow-up <b>[pages 4-6]</b><br>(b) For matched studies, give matching criteria and number of exposed and unexposed <b>[pages 7-8]</b>                                                                                                                                                                                                                                                        |
| Variables                    | 7       | Clearly define all outcomes, exposures, predictors, potential confounders, and effect modifiers. Give diagnostic criteria, if applicable <b>[pages 5-7]</b>                                                                                                                                                                                                                                                                                                                                                    |
| Data sources/<br>measurement | 8*      | For each variable of interest, give sources of data and details of methods of assessment (measurement). Describe comparability of assessment methods if there is more than one group <b>[pages 6-7]</b>                                                                                                                                                                                                                                                                                                        |
| Bias                         | 9       | Describe any efforts to address potential sources of bias <b>[See pages 7-8 with more information included in the 'study limitations' section, page 14]</b>                                                                                                                                                                                                                                                                                                                                                    |
| Study size                   | 10      | Explain how the study size was arrived at <b>[See pages 5-6 and 'rates of lumbar surgery in HES' and 'percentage of lumbar surgery patients with persistent postoperative pain (cases)' under 'results', pages 8-9]</b>                                                                                                                                                                                                                                                                                        |
| Quantitative variables       | 11      | Explain how quantitative variables were handled in the analyses. If applicable, describe which groupings were chosen and why <b>[pages 7-8]</b>                                                                                                                                                                                                                                                                                                                                                                |
| Statistical methods          | 12      | (a) Describe all statistical methods, including those used to control for confounding <b>[page 7-8]</b><br>(b) Describe any methods used to examine subgroups and interactions <b>[n/a]</b><br>(c) Explain how missing data were addressed <b>[n/a]</b><br>(d) If applicable, explain how loss to follow-up was addressed <b>[n/a, the study inclusion criteria stipulated that all patients were required to have 2 years follow up in the data]</b><br>(e) Describe any sensitivity analyses <b>[page 8]</b> |
| <b>Results</b>               |         |                                                                                                                                                                                                                                                                                                                                                                                                                                                                                                                |
| Participants                 | 13*     | (a) Report numbers of individuals at each stage of study—eg numbers potentially eligible, examined for eligibility, confirmed eligible, included in the study, completing follow-up, and analysed <b>[pages 8-9]</b><br>(b) Give reasons for non-participation at each stage <b>[n/a]</b><br>(c) Consider use of a flow diagram <b>[n/a]</b>                                                                                                                                                                   |
| Descriptive data             | 14*     | (a) Give characteristics of study participants (eg demographic, clinical, social) and                                                                                                                                                                                                                                                                                                                                                                                                                          |

|                          |     |                                                                                                                                                                                                                                                                                                                                                                                                                                                                                                                               |
|--------------------------|-----|-------------------------------------------------------------------------------------------------------------------------------------------------------------------------------------------------------------------------------------------------------------------------------------------------------------------------------------------------------------------------------------------------------------------------------------------------------------------------------------------------------------------------------|
|                          |     | information on exposures and potential confounders [ <b>page 10 and table 1</b> ]                                                                                                                                                                                                                                                                                                                                                                                                                                             |
|                          |     | (b) Indicate number of participants with missing data for each variable of interest [ <b>Table 2</b> ]                                                                                                                                                                                                                                                                                                                                                                                                                        |
|                          |     | (c) Summarise follow-up time (eg, average and total amount) [ <b>pages 12-13</b> ]                                                                                                                                                                                                                                                                                                                                                                                                                                            |
| Outcome data             | 15* | Report numbers of outcome events or summary measures over time [ <b>Tables 2 and 3</b> ]                                                                                                                                                                                                                                                                                                                                                                                                                                      |
| Main results             | 16  | (a) Give unadjusted estimates and, if applicable, confounder-adjusted estimates and their precision (eg, 95% confidence interval). Make clear which confounders were adjusted for and why they were included [ <b>n/a matched control group used to obtain net costs attributable to PPP</b> ]<br>(b) Report category boundaries when continuous variables were categorized [ <b>n/a</b> ]<br>(c) If relevant, consider translating estimates of relative risk into absolute risk for a meaningful time period [ <b>n/a</b> ] |
| Other analyses           | 17  | Report other analyses done—eg analyses of subgroups and interactions, and sensitivity analyses [ <b>page 13</b> ]                                                                                                                                                                                                                                                                                                                                                                                                             |
| <b>Discussion</b>        |     |                                                                                                                                                                                                                                                                                                                                                                                                                                                                                                                               |
| Key results              | 18  | Summarise key results with reference to study objectives [ <b>Pages 13-14</b> ]                                                                                                                                                                                                                                                                                                                                                                                                                                               |
| Limitations              | 19  | Discuss limitations of the study, taking into account sources of potential bias or imprecision. Discuss both direction and magnitude of any potential bias [ <b>Pages 14-15</b> ]                                                                                                                                                                                                                                                                                                                                             |
| Interpretation           | 20  | Give a cautious overall interpretation of results considering objectives, limitations, multiplicity of analyses, results from similar studies, and other relevant evidence [ <b>Pages 15-16</b> ]                                                                                                                                                                                                                                                                                                                             |
| Generalisability         | 21  | Discuss the generalisability (external validity) of the study results [ <b>Pages 14-15</b> ]                                                                                                                                                                                                                                                                                                                                                                                                                                  |
| <b>Other information</b> |     |                                                                                                                                                                                                                                                                                                                                                                                                                                                                                                                               |
| Funding                  | 22  | Give the source of funding and the role of the funders for the present study and, if applicable, for the original study on which the present article is based [ <b>See ‘funding’ and ‘competing interests’ data uploaded with submission</b> ]                                                                                                                                                                                                                                                                                |

\*Give information separately for exposed and unexposed groups.

**Note:** An Explanation and Elaboration article discusses each checklist item and gives methodological background and published examples of transparent reporting. The STROBE checklist is best used in conjunction with this article (freely available on the Web sites of PLoS Medicine at <http://www.plosmedicine.org/>, Annals of Internal Medicine at <http://www.annals.org/>, and Epidemiology at <http://www.epidem.com/>). Information on the STROBE Initiative is available at <http://www.strobe-statement.org>.

# BMJ Open

**The incidence and healthcare costs of persistent post-operative pain following lumbar spine surgery in the United Kingdom: a cohort study using the Clinical Practice Research Datalink (CPRD) and Hospital Episode Statistics (HES)**

|                                 |                                                                                                                                                                                                                                                                                                                                                                                                                                                                                                                                                                                   |
|---------------------------------|-----------------------------------------------------------------------------------------------------------------------------------------------------------------------------------------------------------------------------------------------------------------------------------------------------------------------------------------------------------------------------------------------------------------------------------------------------------------------------------------------------------------------------------------------------------------------------------|
| Journal:                        | <i>BMJ Open</i>                                                                                                                                                                                                                                                                                                                                                                                                                                                                                                                                                                   |
| Manuscript ID                   | bmjopen-2017-017585.R1                                                                                                                                                                                                                                                                                                                                                                                                                                                                                                                                                            |
| Article Type:                   | Research                                                                                                                                                                                                                                                                                                                                                                                                                                                                                                                                                                          |
| Date Submitted by the Author:   | 24-Jul-2017                                                                                                                                                                                                                                                                                                                                                                                                                                                                                                                                                                       |
| Complete List of Authors:       | Weir, Sharada; University of Toronto, Centre for Addiction and Mental Health; PHMR Ltd,<br>Samnaliev, Mihail; Boston Childrens Hosp<br>Kuo, Tzu-Chun; PHMR Ltd<br>Ni Choitir, Caitriona; National Centre for Pharmacoeconomics<br>Tierney, Travis; Imperial College London<br>Cumming, David; Ipswich Hospital NHS Trust<br>Bruce, Julie; University of Warwick, Warwick Clinical Trials Unit<br>Manca, Andrea; York University<br>Taylor, Rod; University of Exeter, Peninsula Medical School<br>Eldabe, Sam; James Cook University Hospital, Department of Pain and Anaesthesia |
| <b>Primary Subject Heading</b>: | Epidemiology                                                                                                                                                                                                                                                                                                                                                                                                                                                                                                                                                                      |
| Secondary Subject Heading:      | Health economics                                                                                                                                                                                                                                                                                                                                                                                                                                                                                                                                                                  |
| Keywords:                       | Persistent post-operative pain (PPP), Failed Back Surgery Syndrome (FBSS), Lumbar surgery, Clinical Practice Research Datalink (CPRD), Hospital Episode Statistics (HES)                                                                                                                                                                                                                                                                                                                                                                                                          |
|                                 |                                                                                                                                                                                                                                                                                                                                                                                                                                                                                                                                                                                   |

SCHOLARONE™  
Manuscripts

1  
2  
3 **The incidence and healthcare costs of persistent post-operative pain following lumbar**  
4 **spine surgery in the United Kingdom: a cohort study using the Clinical Practice Research**  
5 **Datalink (CPRD) and Hospital Episode Statistics (HES)**  
6  
7  
8

9  
10 Sharada Weir, DPhil<sup>1,2</sup>, Mihail Samnaliev, PhD<sup>1,3</sup>, Tzu-Chun Kuo, PhD<sup>1</sup>, Caitriona Ni Choitir,  
11  
12 MSc, MPharm<sup>4</sup>, Travis S Tierney, MD, DPhil<sup>5</sup>, David Cumming, MbChB<sup>6</sup>, Julie Bruce, PhD<sup>7</sup>,  
13  
14 Andrea Manca, MSc, PhD<sup>8</sup>, Rod S Taylor, PhD<sup>9</sup>, and Sam Eldabe, MD<sup>10</sup>  
15  
16  
17  
18

19 **Author affiliations:**

- 20  
21 1. PHMR, Ltd., London, UK  
22  
23 2. Institute for Mental Health Policy Research, Centre for Addiction and Mental Health,  
24  
25 Toronto, CA  
26  
27 3. Boston Children's Hospital, Harvard Medical School, Boston, US  
28  
29 4. National Centre for Pharmacoeconomics, Dublin, IE  
30  
31 5. Imperial College, London, UK  
32  
33 6. Ipswich Hospital, Ipswich UK  
34  
35 7. Warwick Clinical Trials Unit, Warwick Medical School, University of Warwick, UK  
36  
37 8. Centre for Health Economics, York University, York, UK  
38  
39 9. University of Exeter Medical School, Exeter, UK  
40  
41 10. The James Cook University Hospital, Middlesbrough, UK  
42  
43  
44  
45  
46  
47  
48  
49

50 **Address for correspondence:**

51  
52 Sharada Weir, DPhil, PHMR, Ltd., Bldg D, Berkeley Works, Berkley Grove, London, NW1 8XY,  
53  
54 United Kingdom; E-mail: sharadaweir@phmr.com; Tel: 011-44-208-365-2185.  
55  
56  
57  
58  
59  
60

## Abstract

**Objective:** To characterize incidence and healthcare costs associated with persistent post-operative pain (PPP) following lumbar surgery.

**Design:** Retrospective, population-based cohort study.

**Setting** Clinical Practice Research Datalink (CPRD) and Hospital Episode Statistics (HES) databases.

**Participants:** Population-based cohort of 10,216 adults who underwent lumbar surgery in England from 1997/98 through 2011/12 and had at least one year of pre-surgery data and two years of postoperative follow-up data in the linked CPRD-HES.

**Primary and secondary outcomes measures:** Incidence and total healthcare costs over 2, 5, and 10 years attributable to persistent postoperative pain following initial lumbar surgery.

**Results:** The rate of individuals undergoing lumbar surgery in the CPRD-HES linked data doubled over the 15-year study period, fiscal years 1997/98 to 2011/12, from 2.5 to 4.9 per 10,000 adults. Over the most recent five-year period (2007/08 to 2011/12), on average 20.8% [95% CI: 19.7% to 21.9%] of lumbar surgery patients met criteria for PPP. Rates of health care utilisation were significantly higher for patients with PPP across all types of care. Over two years following initial spine surgery, the mean cost difference between patients with and without PPP was £5,383 [95% CI: £4,872 to £5,916]. Over five and ten years following initial spine surgery, the mean cost difference between patients with and without PPP increased to £10,195 [95% CI: £8,726 to £11,669] and £14,318 [95% CI: £8,386 to £19,771], respectively. Extrapolated to the UK population, we estimate nearly 5,000 adults experience PPP after spine surgery annually, with each new cohort costing the UK NHS in excess of £70 million over the first 10 years alone.

1  
2  
3 **Conclusions:** Persistent pain affects more than one-in-five lumbar surgery patients and  
4  
5 accounts for substantial long term health care costs. There is a need for formal, evidence-  
6  
7 based guidelines for a coherent, coordinated management strategy for patients with  
8  
9 continuing pain after lumbar surgery.  
10  
11

12  
13  
14 **Keywords:**

15  
16  
17 Persistent post-operative pain (PPP); Failed back surgery syndrome (FBSS); lumbar surgery;  
18  
19 Clinical Practice Research Datalink (CPRD); Hospital Episode Statistics (HES)  
20  
21

22  
23  
24 **Strengths and limitations of this study**

- 25  
26  
27
  - This is the first study to estimate the occurrence of PPP following lumbar surgery  
28  
29 using a sample of surgical patients selected from routinely collected UK hospital and  
30  
31 primary care data  
32
  - Our estimates of healthcare utilisation and costs are based on real world experiences  
33  
34 of the full range of lumbar surgery patients found in clinical practice  
35  
36
  - A limitation of using electronic medical records data is the classification of patients  
37  
38 with PPP as there is a no specific diagnosis code or set of codes for the condition of  
39  
40 PPP and our data do not contain information on pain scores commonly used to  
41  
42 assess the existence and severity of chronic pain following recovery from surgery  
43  
44
  - In contrast with previous studies that have relied on multiple assumptions regarding  
45  
46 treatment patterns or on small and/or non-representative patient samples, we were  
47  
48 able to calculate more precise estimates of PPP following lumbar surgery  
49  
50  
51  
52  
53  
54

55  
56  
57  
58  
59  
60

## INTRODUCTION

Persistent post-operative pain in lumbar surgery patients—more commonly known as failed back surgery syndrome (FBSS)—refers to chronic back and/or leg pain that continues or recurs in some patients following spinal surgery. It may be caused by one or a combination of factors including: residual or recurrent disc herniation, persistent post-operative compression of a spinal nerve, altered joint mobility, joint instability, postoperative myofascial pain development, scar tissue (fibrosis), and/or spinal muscular deconditioning.[1-3] Psychosocial factors that have been identified in this and other chronic post-surgical pain conditions include pre-operative anxiety, depression, poor coping strategies, and pain catastrophizing. Litigation and Worker's Compensation have also been associated with reports of ongoing pain.[4,5] Patients form a diverse group, with complex and varied aetiologies and symptoms.[6,7]

Authoritative publications, mainly large case series and clinical trials, report that 10-40% of all patients who undergo lumbar surgery develop some form of chronic post-operative pain.[8-16] The wide range of estimates reported reflect varying clinical experiences of different institutions and the small samples of patients on which these estimates are based. In 2013, Thompson took a mid-range estimate of 20% failure applied to a rate of lumbar surgery in the UK population of 5 per 10,000 people and concluded that there are approximately 6,000 new cases of PPP following spine surgery in the UK every year.[17] More precise estimates for the UK are not available.

Up-to-date, population-based estimates of incidence are required to keep pace with surgical advances and to inform health care system spending in this population. Using a formal and more rigorous epidemiological data-driven approach, we aim to provide robust estimates of the incidence and health care costs associated with PPP following lumbar surgery in the UK over a 15-year period, from 1997/98-2011/12.

## METHODS

### Setting and data sources

This study employs a retrospective cohort design using two linked UK databases: the Hospital Episode Statistics (HES) database and UK Clinical Practice Research Datalink (CPRD). A supplementary online appendix provides more detail on these data. Approval was granted by the Independent Scientific Advisory Committee for Medicines and Healthcare products Regulatory Agency (MHRA) on December 17, 2014 (ISAC Protocol 14-180R).

### Study participants

Incidence of lumbar surgery was calculated on a patient-basis, as the number of patients aged 18 and above who underwent one or more lumbar procedures in a given fiscal year, expressed as a rate per 10,000 adults in the CPRD-HES linked dataset. Index operative procedures included any single procedure or combination of discectomy/microdiscectomy, excision of lumbar intervertebral disc, laminectomy, foraminotomy, lumbar decompression (or fenestration) or lumbar fusion (including all anterior and posterior approaches as well as combined approaches). Patients were required to have at least two years of follow up data to allow sufficient time to observe criteria for PPP following the index surgery.

### Definition of Persistent Postoperative Pain

From our lumbar surgery cohort, we categorized each individual as a 'success' (i.e., no evidence of PPP) or 'failure' (i.e., evidence of PPP). Any one of the following three criteria, alone or in combination, were taken as evidence of pain continuing past the expected period for recovery following index lumbar surgery:



- 1  
2  
3 1. any additional lumbar surgery of any type occurring between 6-24 months post-  
4  
5 index surgery;
- 6  
7  
8 2. a minimum of one pain-related physician visit in each of two consecutive quarters at  
9  
10 any point during the 6-24 months post-index surgery identified using READ codes in  
11  
12 CPRD or treatment specialty codes in the HES Outpatient file;
- 13  
14  
15 3. any other surgical intervention (e. g., neuromodulation, implantation of drug  
16  
17 infusion delivery system) to address pain occurring at any time, not limited to 24  
18  
19 months after the index surgery, identified from either CPRD or the HES inpatient or  
20  
21 outpatient datasets.  
22  
23

24  
25  
26 Prescription of analgesics (including opioids, non-steroidal anti-inflammatory drugs  
27  
28 (NSAIDs), antidepressants or anticonvulsants/antiepileptic drugs used for pain, and other  
29  
30 analgesic therapies for a period of at least 6 months from 6-24 months post-index) was not  
31  
32 by itself considered evidence of persistent postoperative pain as patients may be prescribed  
33  
34 analgesics for other painful conditions.  
35  
36

37  
38 A minimum period of three months has been proposed for tissue healing after  
39  
40 surgery and this time period is also used to define chronicity of pain.[18-20] We applied a  
41  
42 more stringent, minimum six-month period after the index lumbar surgery for patients to  
43  
44 recover from normal, expected postoperative pain. Any additional spine surgery that  
45  
46 occurred during that period was assumed to be related to surgical complications of the  
47  
48 index lumbar procedure, rather than treatment of PPP. The literature suggests that some  
49  
50 patients initially appear to improve following lumbar surgery but later become increasingly  
51  
52 bothered by pain.[4,6,21] Therefore, we allowed for a period of 18 months (6-24 months  
53  
54  
55  
56  
57  
58  
59  
60

1  
2  
3 post-index surgery) over which to evaluate evidence of unresolved, chronic pain based on  
4  
5 recorded ongoing interventions.  
6  
7  
8  
9

### 10 **Healthcare utilisation and costs**

11  
12 A standard cost-of-illness approach[22,23] was taken to estimate total healthcare costs from  
13  
14 the perspective of the UK National Health Service (NHS). We classified all health care  
15  
16 encounters into major categories of health care resource utilisation and assigned unit costs  
17  
18 following standard practice for cost-of-illness and cost effectiveness research (see online-  
19  
20 only supplementary information on cost methodology and unit cost tables). Consistent with  
21  
22 other studies of resource utilisation among similar populations,[24] we estimated total cost  
23  
24 per patient over 24 months for all patients in our study (excluding the cost of the index  
25  
26 surgery). We then extended our analysis out to five and ten years post-index surgery among  
27  
28 the subsets of patients with sufficient follow up data. To account for inflation and variations  
29  
30 in pricing over time, 2013 unit costs were applied to all years. Total costs incorporated direct  
31  
32 (including medical staff), indirect and overhead costs paid by the NHS. Finally, using these  
33  
34 per patient estimates, we projected the total number of PPP cases in the UK annually and  
35  
36 the associated costs to the NHS.  
37  
38  
39  
40  
41  
42  
43  
44  
45

### 46 **Statistical analyses**

47  
48 To estimate rates of PPP, we computed the number of patients who met our criteria for PPP  
49  
50 as a percentage of all patients who underwent initial lumbar surgery within the time frame.  
51  
52 The comparison group of no persistent post-operative pain was drawn from among lumbar  
53  
54 surgery patients who fulfilled the 'no PPP' criteria. We used 1:1 propensity score matching  
55  
56 (without replacement) based on patient's age at surgery, gender, year in which surgery took  
57  
58  
59  
60

1  
2  
3 place, type of initial surgery (fusion vs. decompression), and presence of each of seventeen  
4  
5 comorbidities that comprise the Charlson Comorbidity index (CCI) using the greedy  
6  
7 matching algorithm.[25-27]  
8  
9

10 We estimated healthcare utilisation over a two-year period for patients with PPP  
11  
12 versus the matched controls and presented: (i) the proportion of patients who had a non-  
13  
14 zero healthcare resource utilisation and the number of encounters by category (i.e., primary  
15  
16 care, inpatient care, outpatient attendances, outpatient procedures, accident and  
17  
18 emergency care, and prescriptions for pain medications), and (ii) costs among users of the  
19  
20 respective type of services/events (in order to provide insight into the intensity of resource  
21  
22 utilisation among users of these services). Next, we estimated total health care costs by  
23  
24 category of health care utilisation for all patients. Finally, we estimated the cost attributable  
25  
26 to PPP as the difference in total costs for all PPP patients versus no PPP controls over the  
27  
28 time periods two, five and ten years post-index surgery.  
29  
30  
31  
32

33  
34 Statistical significance of differences between patients with and without PPP were  
35  
36 evaluated using Fisher's exact tests for categorical predictor variables and Wilcoxon tests for  
37  
38 continuous predictor variables. The main analyses compared the matched PPP cases and  
39  
40 controls using Fisher's exact tests for healthcare utilisation and bootstrapping for  
41  
42 differences in average costs. All data manipulation and analyses were conducted using SAS  
43  
44 software, Version 9.4 for Windows [SAS Institute, Cary NC].  
45  
46  
47  
48  
49

### 50 **Sensitivity analysis**

51  
52 In sensitivity analyses, we adjusted costs using generalised linear models (using log link and  
53  
54 gamma distribution), extended estimating equations, and ordinary least squares.  
55  
56  
57  
58  
59  
60

## RESULTS

### **Rates of lumbar surgery in HES (among patients with linked CPRD data)**

From the linked CPRD-HES database, we identified 10,216 adults who underwent lumbar surgery from fiscal years 1997/98 through 2011/12 and who had at least 12 months of pre-surgery data (used to identify pre-surgical comorbid conditions and exclude those with previous lumbar surgery) and with 24 months follow up. Our denominator for each year included all patients within the linked CPRD/HES dataset with at least 36 months of follow-up to be comparable to the lumbar surgery group in that year. Incidence of PPP was adjusted to reflect the age and sex distribution of the UK population in each year of the study.[28] The age/sex adjusted rate of lumbar surgeries grew steadily from 2.41 per 10,000 in 1997/98 to reach a peak of 4.94 per 10,000 in 2010/11 before falling slightly in 2011/12 to 4.70 per 10,000 (Figure 1).

### **Percentage of lumbar surgery patients with persistent postoperative pain (cases)**

Of the 10,216 adults undergoing lumbar surgery in fiscal years 1997/98-2011/12, 1,756 (17.2%; 95% CI: 16.5% to 17.9%) patients met our criteria for PPP. Among patients with PPP, 85.4% were prescribed pain medication for at least six months compared with 50.3% of patients who did not meet PPP criteria.

Figure 2 shows the impact on our estimates of PPP from including the HES outpatient data, available from 2008 onwards. The dotted line includes patients identified as having PPP using only the CPRD general practice file plus HES inpatient file. The solid line includes patients identified using these files plus the HES outpatient file, accredited as a National Statistic since 2008. The percentage of patients with PPP captured without the HES outpatient file was fairly stable over the entire 15-year study period, but doubles with the

inclusion of HES outpatient data. The percentage of patients with PPP early in the study period is likely to be underestimated as hospital pain clinic visits were not recorded. The more recent data is more likely to be reflective of current UK practice. On average, over the most recent five-year period, 20.8% [95% CI: 19.7% to 21.9%] of eligible patients met our criteria for PPP.

### PPP cases versus lumbar surgery patients without PPP

Prior to matching, a comparison of patients with PPP versus those without showed that PPP patients were younger, more likely to be female and have a slightly higher comorbidity burden, as measured by the Charlson Comorbidity Index. After propensity score matching, as expected, there were no significant differences between the cases and controls (Table 1).

**Table 1:** Characteristics of lumbar surgery patients with and without PPP before and after selecting propensity score matched control group

|                                             | Before matching  |                |            | After matching   |                |            |
|---------------------------------------------|------------------|----------------|------------|------------------|----------------|------------|
|                                             | No PPP<br>n=8460 | PPP<br>n=1756  | P<br>value | No PPP<br>n=1756 | PPP<br>n=1756  | P<br>value |
| Age at surgery (years), mean (sd)           | 53.6<br>(16.0)   | 52.9<br>(15.5) | 0.044      | 52.1<br>(16.0)   | 52.9<br>(15.5) | 0.16       |
| Male, %                                     | 50.7             | 43.3           | <0.001     | 43.0             | 43.3           | 0.86       |
| Charlson Comorbidity Index (CCI), mean (sd) | 1.1<br>(2.0)     | 1.2<br>(2.0)   | 0.002      | 1.1<br>(1.8)     | 1.2<br>(2.0)   | 0.06       |

P-values were based on Fisher's exact tests for categorical and Wilcoxon tests for continuous variables.

### Health care utilisation and cost

Compared to patients without, those with PPP had significantly increased rates of health care utilisation for all health care encounter types. The difference was largest for inpatient hospital care at 77.5% for those with PPP versus 44.9% for those without. Patients with PPP were more than twice as likely as those without PPP to have had two or more inpatient stays in the two years following index surgery.

Amongst those who used care in each of these settings, costs were in most cases significantly greater in the presence of PPP. In particular, PPP was associated with a three-fold increase in average pain medication costs (£1,165 versus £382). Greater costs were also observed in inpatient, outpatient hospital and primary care settings, indicating greater intensity of resource utilisation for patients with PPP in each of these settings (Table 2). Comparing total costs for patients with PPP versus matched controls (no PPP) including both users and non-users of each service, we found that the mean additional cost attributable to PPP in the two years following surgery was £5,383 per patient (Table 3). Inpatient costs accounted for almost half (46.5%) of the cost differential and primary care contributed 26.9%.

When costs estimates were extended to five and ten-years following the index lumbar surgery, among patients with sufficient follow up data for each period, the difference in costs between patients with and without PPP increased. In total over five years following surgery, patients with PPP (n=894 cases) cost an additional mean of £10,195 [95% CI: 8,726 to 11,669], rising to a total mean cost differential of £14,318 [95% CI: 8,386 to 19,771] over 10 years (n=186 cases). Note that the difference may have been underestimated for patients who underwent surgery prior to the release of the HES outpatient files in 2003/04.

**Table 2:** Health care resource use and costs (2013 British Pounds) in the two year period following index surgery among users of services, cases (PPP) versus propensity score matched controls (no PPP)

|                            | Health care utilisation |                 | Costs among users only |                   |
|----------------------------|-------------------------|-----------------|------------------------|-------------------|
|                            | No PPP (N=1756)         | PPP (N=1756)    | No PPP                 | PPP               |
|                            | n (%)                   | n (%)           | mean (sd)              | mean (sd)         |
| Any inpatient              | 788 (44.9)              | 1,361 (77.5) ** | £3,678 (4,520)         | £5,357 (5,282) ** |
| 0                          | 968 (55.1)              | 395 (22.5)      |                        |                   |
| 1                          | 377 (21.5)              | 484 (27.6)      |                        |                   |
| 2                          | 192 (10.9)              | 351 (20.0)      |                        |                   |
| >2                         | 219 (12.5)              | 526 (29.9)      |                        |                   |
| Any Outpatient attendances | 1,510 (86.0)            | 1,606 (91.5) ** | £783 (975)             | £1,316 (1,149) ** |
| 0                          | 246 (14.0)              | 150 (8.5)       |                        |                   |
| 1 - 6                      | 904 (51.5)              | 438 (24.9)      |                        |                   |
| 7-12                       | 349 (19.9)              | 512 (29.2)      |                        |                   |
| > 12                       | 257 (14.6)              | 656 (37.4)      |                        |                   |
| Any Outpatient procedures  | 435 (24.8)              | 583 (33.2) **   | £540 (817)             | £664 (875) *      |
| 0                          | 1321 (75.2)             | 1,173 (66.8)    |                        |                   |
| 1                          | 203 (11.6)              | 221 (12.6)      |                        |                   |
| 2                          | 86 (4.9)                | 116 (6.6)       |                        |                   |
| >2                         | 146 (8.3)               | 246 (14.0)      |                        |                   |
| Any Accident & emergency   | 325 (18.5)              | 484 (27.6) **   | £257 (193)             | £265 (213) x      |
| 0                          | 1,431 (81.5)            | 1,272 (72.4)    |                        |                   |
| 1                          | 205 (11.7)              | 306 (17.4)      |                        |                   |
| 2                          | 67 (3.8)                | 94 (5.4)        |                        |                   |
| >2                         | 53 (3.0)                | 84 (4.8)        |                        |                   |

|                                          |              |                 |                |                   |
|------------------------------------------|--------------|-----------------|----------------|-------------------|
| Any Primary care                         | 1,751 (99·7) | 1,756 (100·0) * | £3,178 (2,560) | £4,616 (3,011) ** |
| Number of primary care visits, mean (sd) | 73.3 (57·8)  | 107.5 (68·3)    |                |                   |
| Any pain drugs                           | 1,699 (96·7) | 1,750 (99·7) ** | £382 (2,348)   | £1,165 (4,349) ** |
| Number of prescriptions, mean (sd)       | 70.1 (98·6)  | 104.9 (104·0)   |                |                   |

\* < .05; \*\* < .01 comparing rates of health care use (using Fisher's exact tests) and mean costs (based on bootstrapping) among patients with PPP vs. no PPP; PPP=persistent postoperative pain.

**Table 3:** Total 2-year costs (2013 British Pounds), cases (PPP) versus propensity score matched control cohort (no PPP)

|                        | No PPP<br>(N=1, 756) | PPP<br>(N=1, 756) | Difference | [95% CIs]     |
|------------------------|----------------------|-------------------|------------|---------------|
|                        | Mean (sd)            | Mean (sd)         |            |               |
| Inpatient              | £1,651 (3,537)       | £4,152 (5,160)    | £2,501     | [2,202-2,811] |
| Outpatient attendances | £673 (944)           | £1,204 (1,159)    | £531       | [456-604]     |
| Outpatient procedures  | £134 (469)           | £221 (593)        | £87        | [51-121]      |
| Accidents & emergency  | £48 (130)            | £73 (163)         | £25        | [15-35]       |
| Primary care           | £3,169 (2,562)       | £4,616 (3,011)    | £1,447     | [1,263-1,661] |
| Pain medications       | £370 (2,310)         | £1,161 (4,342)    | £791       | [574-1,027]   |
| Total costs            | £6,044 (6,712)       | £11,427 (9,304)   | £5,383     | [4,872-5,916] |

### Sensitivity analyses

Estimating the PPP cost differential with generalised linear models (using log link and gamma distribution), extended estimating equations, and ordinary least squares produced very similar results to the main analysis.



## DISCUSSION

A total of 10,216 adults identified within the linked CPRD-HES database underwent lumbar spinal surgery between 1997/98 and 2011/12, with the rate of individuals receiving surgery approximately doubling over this time period. Using the criteria of additional lumbar surgery within 6-24 months, pain-related physician visits over at least two consecutive quarters within the same period, or other surgical intervention therapy at any time, we estimate that approximately one in five (20.8%; 95% CI: 18.5% to 23.0%) lumbar spine surgery patients in the UK experience persistent post-operative pain within two years of their index surgery. The costs of PPP patients over 10 years following lumbar surgery were more than 50% higher compared to those patients without ongoing pain.

Our estimate of PPP was conservative in that we did not include patients who had ongoing prescriptions for analgesic pain medications in the absence of other more rigorous indicators of back pain. If we had included any prescribing of pain medication, our estimate of post-lumbar surgery PPP incidence would have risen from 20.8% to 61.8%.

Our incidence estimate is consistent with a recent large Japanese study. Using internet-based survey data, the authors found that among 1,842 respondents who self-reported having undergone lumbar surgery in the past 10 years, 20.6% experienced ongoing pain.[29]

### Strengths and limitations of this study

This study used routinely captured hospital and primary care data to investigate diagnoses and treatment patterns on a population sample of lumbar surgery patients. Hence, our observations are based on patterns of care for a large and representative group of patients undergoing treatment in real world settings. This enabled us to calculate more precise estimates of PPP following lumbar surgery; previous studies have relied on multiple

1  
2  
3 assumptions regarding treatment patterns or on randomised controlled clinical trial data  
4  
5 with small, non-representative patient samples.  
6

7  
8 A limitation of using electronic medical records data is the classification of patients  
9  
10 with PPP. There is a no specific diagnosis code or set of codes for the condition of PPP.  
11  
12 Instead, our estimates are based upon presentation for further interventions, surgery  
13  
14 and/or attendance at specialist pain clinics. The data do not contain information on pain  
15  
16 scores commonly used to assess the existence and severity of chronic pain following  
17  
18 recovery from surgery. Evidence on the persistence of pain for a period of at least six  
19  
20 months in the year following surgery was, by necessity, inferred from data on receipt of  
21  
22 therapies for chronic pain, referrals to pain specialists, etc. It is possible that some patients  
23  
24 who had a successful outcome of back surgery experienced ongoing concurrent or new  
25  
26 onset chronic pain from another source and were misclassified as having post-lumbar PPP.  
27  
28  
29  
30  
31  
32

### 33 **Implications of our findings for policy and/or practice**

34  
35  
36 Our findings are based on a broadly representative sample of the UK population undergoing  
37  
38 lumbar surgery. The mid-2012 population estimate of adults in the UK was 50.2 million.[30]  
39  
40 Based on our estimates of lumbar surgery, we would predict that approximately 23,592  
41  
42 patients underwent initial lumbar surgery in the UK at the end of our study period. This  
43  
44 equates to 4,907 adults (20.8%) with PPP following lumbar surgery annually in the UK and  
45  
46 that the associated short term (2-year) costs of caring for PPP amount to approximately  
47  
48 £26.4 million for each new annual cohort of PPP patients. Extending our horizon to cover 10  
49  
50 years following index surgery, we would predict that each new annual cohort of lumbar  
51  
52 surgery patients experiencing PPP could cost the NHS approximately £70.3 million over the  
53  
54  
55  
56  
57  
58  
59  
60

1  
2  
3 first decade, with costs likely to continue accumulating over the remainder of the lifespan of  
4  
5 members of that cohort.  
6

7  
8 Despite these large and ongoing costs, no formal guidelines to date have been put  
9  
10 forward for the treatment of persistent pain after lumbar surgery. Our findings for patients  
11  
12 with available follow-up data for two, five and ten years postoperatively suggest that PPP  
13  
14 patients have significantly higher resource utilisation and that these costs continue for at  
15  
16 least a decade following index surgery. Although our data contained too few patients with  
17  
18 more than 10 years of follow up to extend our estimates beyond the initial decade, it is  
19  
20 likely that the PPP cost differential persists into the long term particularly as patients' age.  
21  
22 Our 10 year estimate is a censored estimate of the total lifetime cost of managing these  
23  
24 patients.  
25  
26  
27

28  
29 The growth in rates of lumbar surgery suggests that the numbers of patients living  
30  
31 with ongoing pain in the UK is substantial and growing. In addition to the NHS cost burden,  
32  
33 we know from other studies that these patients experience significant reduction in health-  
34  
35 related quality of life. For example, in the PROCESS study, mean baseline EQ5D index score  
36  
37 among lumbar surgery patients with ongoing pain was 0.14,[31] which is much lower than  
38  
39 has been documented for other patient populations with chronic diseases, including  
40  
41 cancer.[32] There is a need for a coherent management strategy for primary care staff, pain  
42  
43 specialists and surgeons to offer to these patients. High quality primary studies are urgently  
44  
45 required to provide more understanding of the treatment and recovery trajectory of this  
46  
47 patient group.  
48  
49  
50  
51  
52  
53  
54  
55  
56  
57  
58  
59  
60

## CONCLUSION

Utilising routinely-collected clinical data, this study shows that approximately one-in-five lumbar spine surgery patients in the UK experience PPP (also known as, 'failed back surgery syndrome'). PPP is associated with higher rates of resource utilisation and with increased intensity of resource use in the inpatient, outpatient, and primary care settings. The costs to the NHS of treating patients with PPP are substantive and remain elevated over time, highlighting the need for formalized national guidelines for the management of patients with lumbar pain pre- and post-surgery.

## FIGURE LEGENDS

**Figure 1.** Age- and sex-adjusted incidence of lumbar surgery in linked CPRD-HES, rates per 10,000 adults

**Figure 2.** Percentage of patients with PPP by year of index lumbar surgery

## ACKNOWLEDGEMENTS

Funding provided by Medtronic International Trading Sàrl, Switzerland. Funke Stauble and Shanti Thavaneswaran brought together the study team and supported the research process.

This study was based in part on data from the Clinical Practice Research Datalink obtained under license from the UK Medicines and Healthcare products Regulatory Agency. However, the interpretation and conclusions contained in this study are those of the authors alone.

1  
2  
3 **Contributors:** SE, AM, RST and SW conceived and designed the study originally; JB and DC  
4  
5 joined the study team part way through the analysis planning phase and helped to shape  
6  
7 the final study design. SW acquired the data. CNC, TCK, MS, TT and SW developed the  
8  
9 analysis plan. TCK, MS and SW analysed the data. SW drafted the manuscript. JB, DC, SE,  
10  
11 TCK, AM, MS, RST, TT and SW revised the manuscript. All authors contributed intellectually  
12  
13 to the interpretation of the data, participated in manuscript development and approved the  
14  
15 final version. SW is the guarantor.  
16  
17  
18  
19

20  
21 **Competing Interests:** At the time of the study, CNC was employed by PHMR, LLC, who  
22  
23 received consulting fees from Medtronic. SW, MS and TCK received consulting fees from  
24  
25 PHMR, LLC. RST, AM, JB, DC and SE received consulting fees from Medtronic as advisors to  
26  
27 the project. TST has no competing interests associated with this work.  
28  
29  
30  
31  
32

33 **Funding:** This study was supported by Medtronic International Trading Sàrl, Switzerland.  
34  
35 However, Medtronic did not play a direct role in the study design; in the collection, analysis  
36  
37 and interpretation of data; in the writing of the report; and in the decision to submit the  
38  
39 manuscript for publication.  
40  
41  
42  
43  
44

45 **Data sharing:** No additional data are available.  
46  
47  
48  
49  
50  
51  
52  
53  
54  
55  
56  
57  
58  
59  
60

## REFERENCES

- 1 Hazard RG. Failed back surgery syndrome: surgical and non-surgical approaches. *Clin Orthop Relat R* 2006;443:228–232.
- 2 Van Buyten JP, Linderoth B. “The failed back surgery syndrome”: definition and therapeutic algorithms – an update. *Eur J Pain Suppl* 2010;4:273–286.
- 3 Bokov A, Istrellov A, Skorodumov A, Aleynik A, Simonov A, Mlyavykh S. An analysis of reasons for failed back surgery syndrome and partial results after different types of surgical lumbar nerve root decompression. *Pain Physician* 2011;14:545–557.
- 4 Chan C-W, Peng P. Failed Back Surgery Syndrome. *Pain Med* 2011;12:577–606.
- 5 Theunissen M, Peters ML, Bruce J, Gramke HF, Marcus MA. Preoperative anxiety and catastrophizing: a systematic review and meta-analysis of the association with chronic postsurgical pain. *Clin J Pain*. 2012;28(9):819-41.
- 6 Slipman CW, Shin CH, Patel RK, et al. Etiologies of Failed Back Surgery Syndrome. *Pain Med* 2002;3:200-14; discussion 214–7.
- 7 Tharmanathan P, Adamson J, Ashby R, Eldabe S. Diagnosis and treatment of failed back surgery syndrome in the UK: mapping of practice using a cross-sectional survey. *Br J Pain* 2012;6:142–152.
- 8 Yorimitsu E, Chiba K, Toyama Y, Hirabayashi K, McCulloch JA. Long-term outcomes of standard discectomy for lumbar disc herniation: a follow-up study of more than 10 years. *Spine (Phila Pa 1976)* 2001;26:652–657.
- 9 Javid MJ, Hadar EJ. Long-term follow-up review of patients who underwent laminectomy for lumbar stenosis: a prospective study. *J Neurosurg* 1998;89:1–7.
- 10 Andrews DW, Lavyne MH. Retrospective analysis of microsurgical and standard lumbar discectomy. *Spine (Phila Pa 1976)* 1990;15:329–335.

- 1  
2  
3 11 Caspar W, Campbell B, Barbier DD, Gotfried Y. The Caspar microsurgical discectomy  
4 and comparison with a conventional standard lumbar disc procedure. *Neurosurgery*  
5 1991;28:78–87.  
6  
7  
8  
9  
10 12 Frymoyer JW, Hanley E, Howe J, Kuhlmann D, Matteri R. Disc excision and spine fusion  
11 in the management of lumbar disc disease. A minimum ten year follow-up. *Spine*  
12 (*Phila Pa 1976*) 1978;3:1–6.  
13  
14  
15  
16  
17 13 Ross JS, Robertson JT, Frederickson RC, et al. Association between peridural scar and  
18 recurrent radicular pain after lumbar discectomy: Magnetic resonance evaluation.  
19  
20  
21  
22  
23  
24  
25  
26  
27  
28  
29  
30  
31  
32 14 Fritsch EW, Heisel J, Rupp S. The failed back surgery syndrome: Reasons,  
33  
34  
35  
36  
37  
38  
39  
40  
41  
42  
43  
44  
45  
46  
47  
48  
49  
50  
51  
52  
53  
54  
55  
56  
57  
58  
59  
60
- 15 North RB, Kidd DH, Zahurak M, James CS, Long DM. Spinal cord stimulation for  
chronic, intractable pain: experience over two decades. *Neurosurgery* 1993;32:384–  
394.
- 16 Wilkinson HA. *The Failed Back Syndrome: Etiology and Therapy*. Philadelphia: *Harper  
& Row*, 1991.
- 17 Thomson S. Failed back surgery syndrome—definition, epidemiology and  
demographics. *Br J Pain* 2013;7:56–59.
- 18 International Association for the Study of Pain. Classification of Chronic Pain, Second  
Edition (Revised). Available online: [http://www.iasp-  
pain.org/PublicationsNews/Content.aspx?ItemNumber=1673&navItemNumber=677](http://www.iasp-pain.org/PublicationsNews/Content.aspx?ItemNumber=1673&navItemNumber=677)  
(Accessed: June 20, 2016).

- 1  
2  
3 19 Kehlet H, Jensen TS, Woolf CJ. Persistent postsurgical pain: risk factors and prevention.  
4  
5 *Lancet* 2006;367:1618–25.  
6  
7  
8 20 Macrae WA. Chronic post-surgical pain: 10 years on. *Br J Anaesth* 2008; 101: 77–86.  
9  
10 21 Hussain A, Erdek M. Interventional pain management for failed back surgery  
11  
12 syndrome. *Pain Pract* 2014;14:64-78.  
13  
14  
15 22 Akobundu E, Ju J, Blatt L, Mullins CD. Cost-of-illness studies: a review of current  
16  
17 methods. *Pharmacoeconomics* 2006;24:869–90.  
18  
19  
20 23 Jefferson T, Demicheli V, Mugford M. Cost-of-illness studies, elementary economic  
21  
22 evaluation in health care. 2nd Ed. London: *BMJ Publishing Group*, 2000:17–29.  
23  
24 24 Adogwa O, Owens R, Karikari I, et al. Revision lumbar surgery in elderly patients with  
25  
26 symptomatic pseudarthrosis, adjacent-segment disease, or same-level recurrent  
27  
28 stenosis. Part 2. A cost-effectiveness analysis: clinical article. *J Neurosurg Spine*  
29  
30 2013;18:147–53.  
31  
32  
33 25 Manca A, Austin PC. Using propensity score methods to analyse individual patient-  
34  
35 level cost-effectiveness data from observational studies. York, UK: University of York  
36  
37 HEDG Working Paper No. 08/20 2008. Available online:  
38  
39 <http://www.york.ac.uk/res/herc/research/hedg/wp.htm> (Accessed: October 16,  
40  
41 2016).  
42  
43  
44 26 Parsons LS. Reducing Bias in a Propensity Score Matched-Pair Sample Using Greedy  
45  
46 Matching Techniques. SAS Users Group International 26 (SUGI26), Paper 214-26 2001.  
47  
48 Available online: <http://www2.sas.com/proceedings/sugi26/p214-26.pdf> (Accessed:  
49  
50 October 16, 2016).  
51  
52  
53  
54  
55  
56  
57  
58  
59  
60



- 1  
2  
3 27 Charlson ME, Pompei P, Ales KL, MacKenzie CR. A new method of classifying  
4 prognostic comorbidity in longitudinal studies: Development and validation. *J Chronic*  
5  
6 *Dis* 1987;40:373–83.  
7  
8  
9  
10 28 National Cancer Institute. SEER Stat Tutorials: Calculating Age-adjusted Rates.  
11 Available online: <https://seer.cancer.gov/seerstat/tutorials/aarates/definition.html>  
12 (Accessed: October 28, 2016).  
13  
14  
15  
16  
17 29 Inoue S, Kamiya M, Nishihara M, Arai YP, Ikemoto T, Ushida T. Prevalence,  
18 characteristics, and burden of failed back surgery syndrome: the influence of various  
19 residual symptoms on patient satisfaction and quality of life as assessed by a  
20 nationwide Internet survey in Japan. *J Pain Res.* 2017;10:811–823.  
21  
22  
23  
24  
25  
26  
27 30 Office for National Statistics (ONS). Population Estimates for UK, England and Wales,  
28 Scotland and Northern Ireland (Mid-2012 file). Available online:  
29 [https://www.ons.gov.uk/peoplepopulationandcommunity/populationandmigration/p](https://www.ons.gov.uk/peoplepopulationandcommunity/populationandmigration/populationestimates/datasets/populationestimatesforukenglandandwalesscotlandandnorthernireland)  
30 [opulationestimates/datasets/populationestimatesforukenglandandwalesscotlandandn](https://www.ons.gov.uk/peoplepopulationandcommunity/populationandmigration/populationestimates/datasets/populationestimatesforukenglandandwalesscotlandandnorthernireland)  
31 [orthernireland](https://www.ons.gov.uk/peoplepopulationandcommunity/populationandmigration/populationestimates/datasets/populationestimatesforukenglandandwalesscotlandandnorthernireland) (Accessed: December 28, 2016).  
32  
33  
34  
35  
36  
37  
38 31 Manca A, Kumar K, Taylor RS, et al. Quality of life, resource consumption and costs of  
39 spinal cord stimulation versus conventional medical management in neuropathic pain  
40 patients with failed back surgery syndrome (PROCESS trial). *Eur J Pain* 2008;12:1047–  
41 1058.  
42  
43  
44  
45  
46  
47  
48 32 Doth AH, Hansson PT, Jensen MP, Taylor RS. The burden of neuropathic pain: a  
49 systematic review and meta-analysis of health utilities. *Pain* 2010;149:338–44.  
50  
51  
52  
53  
54  
55  
56  
57  
58  
59  
60

1  
2  
3  
4  
5  
6  
7  
8  
9  
10  
11  
12  
13  
14  
15  
16  
17  
18  
19  
20  
21  
22  
23  
24  
25  
26  
27  
28  
29  
30  
31  
32  
33  
34  
35  
36  
37  
38  
39  
40  
41  
42  
43  
44  
45  
46  
47  
48  
49  
50  
51  
52  
53  
54  
55  
56  
57  
58  
59  
60

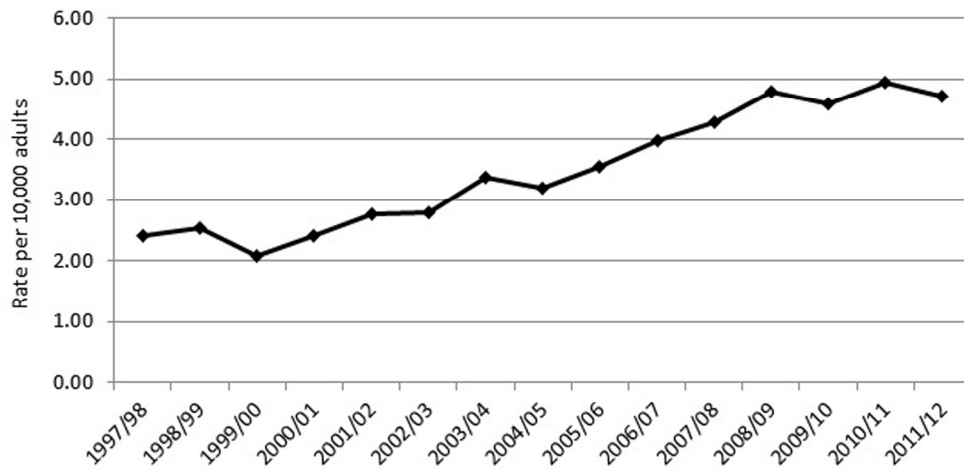

Age- and sex-adjusted incidence of lumbar surgery in linked CPRD-HES, rates per 10,000 adults

172x87mm (300 x 300 DPI)

For peer review only

1  
2  
3  
4  
5  
6  
7  
8  
9  
10  
11  
12  
13  
14  
15  
16  
17  
18  
19  
20  
21  
22  
23  
24  
25  
26  
27  
28  
29  
30  
31  
32  
33  
34  
35  
36  
37  
38  
39  
40  
41  
42  
43  
44  
45  
46  
47  
48  
49  
50  
51  
52  
53  
54  
55  
56  
57  
58  
59  
60

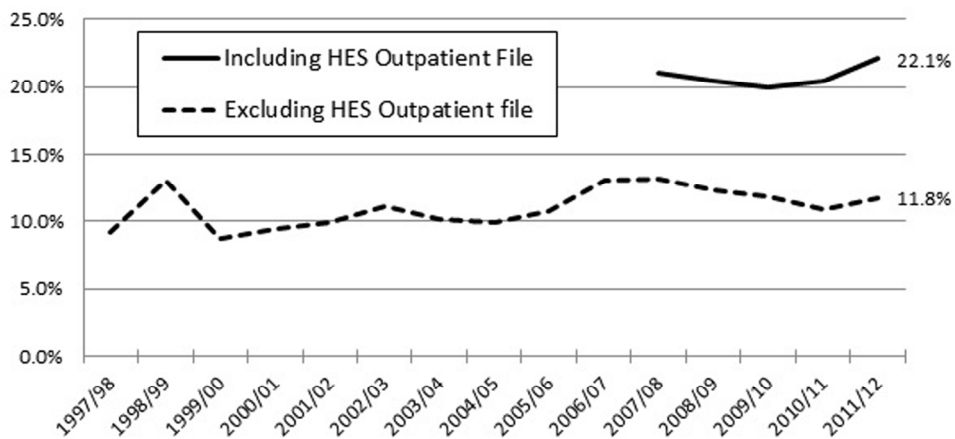

Percentage of patients with PPP by year of index lumbar surgery

161x82mm (300 x 300 DPI)

Review only

## Online Supplementary Material

### Description of the databases

*Hospital Episode Statistic*—The Health and Social Care Information Centre (HSCIC) now NHS Digital, is the national body for mandatory data collection from all hospitals in England. Data are captured regardless of payer status (e.g., private or government) or geographic residency of the patient.<sup>1</sup>

*Clinical Practice Research Datalink*—CPRD has records for about 5.5 million currently registered patients and approximately 13 million patients 'ever' registered. These data are collected from approximately 590 general practices and cover 8% of the UK population. The patient population captured in the CPRD has been shown to be broadly representative of the demographic breakdown of the UK population and the quality and completeness of the data have been well-documented.<sup>2-7</sup> These data have been used to answer a wide range of health care quality and resource utilisation questions, including studies of neuropathic pain.<sup>8-11</sup> Linkage to HES is possible for approximately half of patients in CPRD-registered practices.

### Detailed methods for calculating costs of care by encounter type

Primary care: Primary care was grouped into major types of consultation as in previous studies.<sup>12-18</sup> This included clinical consultations, surgery visits, telephone consultations, out of hour visits, administrative visits and other. The category 'other' included encounters as 'repeat issue' or 'third party consultation'. We created separate indicators for each category. Unit costs associated with these 6 categories were assigned to each unique consultation from UK national average estimates produced by the Personal Social Services Research Unit.<sup>19</sup>

Outpatient attendances and procedures: HES outpatient data were available from 2003/04 onwards. However, the outpatient data tables were not accredited as a National Statistic prior to 2008.<sup>1</sup> We distinguished between regular outpatient attendances and outpatient attendances that included an interventional procedure. Unit costs for both types of attendance were taken from the NHS 'Reference Costs' publication<sup>20</sup> and were assigned by treatment specialty and by first versus follow-up visit.

Inpatient care: Stays in the HES inpatient dataset were classified as elective inpatient stays, long (>1 day) non-elective inpatient stays, short non-elective inpatient stays, day cases and regular day or night admissions. To allow costs to vary with clinical complexity of the patient, stays were grouped by NHS Healthcare Resource Groups, using the HRG4+ 2012-13 Reference Costs Grouper software<sup>21</sup> before applying reference costs for each stay category from the national schedule.<sup>20</sup> This was preferred over costing by simple per diem unit costs multiplied by number of inpatient days, which treats all inpatient encounters as equal in intensity of resources used. The HRG grouping approach allows for the inclusion of costs associated with excess bed days. Costs for cases that were not assigned to an HRG (13.4%) were estimated using the average cost by type of service. Total inpatient costs were obtained by aggregating across subcategories of inpatient care.

Accident & Emergency (A&E): Both CPRD and HES datasets contain information about A&E attendances for patients who were referred to the emergency department or who self-referred and were subsequently admitted to the hospital. A&E attendances were costed using the NHS reference costs.<sup>20</sup> and varied depending on whether attendance resulted in an inpatient admission.

Pain medications: We used the same set of prescription drug codes for pain-related analgesia, including opioids, non-steroidal anti-inflammatory drugs or NSAIDs, selected antidepressants with analgesic properties, anticonvulsant/antiepileptic drugs used for pain, and other analgesic therapies. The selected list was informed by a published randomized controlled trial of spinal cord stimulation for treatment of PPP following lumbar surgery.<sup>22,23</sup> We amended the list to add all new analgesic medications marketed in the intervening period. Each medication was costed by strength and formulation/route assigning corresponding unit costs from the British National Formulary<sup>24</sup> and multiplying by the quantity prescribed using the a methodology similar to that employed in the economic analysis of the PROCESS trial.<sup>25</sup>

## References

1. The Health and Social Care Information Centre, NHS. Hospital Episode Statistics: Hospital Outpatient Activity 2011-12 Summary Report. <http://content.digital.nhs.uk/catalogue/PUB09379/hosp-outp-acti-11-12-summ-repo-rep.pdf>. (Accessed: December 28, 2016).
2. Lewis JD, Brensinger C. Agreement between GPRD smoking data: a survey of general practitioners and a population-based survey. *Pharmacoepidemiol Drug Saf* 2004; **13**: 437–441.
3. Wood L, Martinez C. The general practice research database: role in pharmacovigilance. *Drug Saf* 2004; **27**: 871–881.
4. Jick H, Jick SS, Derby LE. Validation of information recorded on general practitioner based computerised data resource in the United Kingdom. *Brit Med J* 1991; **302**: 766–768.
5. Jick H, Terris BZ, Derby LE, Jick SS. Further validation of information recorded on a general practitioner based computerized data resource in the United Kingdom. *Pharmacoepidemiol Drug Safety* 1992; **1**: 347–349.
6. Hollowell J. The General Practice Research Database: quality of morbidity data. *Popul Trends* 1997; **87**: 36–40.
7. García Rodríguez LA, Gutthann SP. Use of the UK General Practice Research Database for pharmacoepidemiology. *Br J Clin Pharmacol* 1998; **45**: 419–425.
8. Hall GC, Carroll D, Parry D, McQuay H. Epidemiology and treatment of neuropathic pain: the UK primary care perspective. *Pain* 2006; **122**: 156–62.
9. Hall GC, Morant SV, Carroll D, Gabriel ZL, McQuay HJ. An observational descriptive study of the epidemiology and treatment of neuropathic pain in a UK general population. *BMC Fam Pract* 2013; **14**: 28.
10. Berger A, Sadosky A, Dukes E, Edelsberg J, Oster G. Clinical characteristics and patterns of healthcare utilisation in patients with painful neuropathic disorders in UK general practice: a retrospective cohort study. *BMC Neurol* 2012; **12**: 8.
11. Hong J, Reed C, Novick D, Happich M. Costs associated with treatment of chronic low back pain: an analysis of the UK General Practice Research Database. *Spine (Phila Pa 1976)* 2013; **38**: 75–82.
12. Reed C, Hong J, Novick D, Lenox-Smith A, Happich M. Health care costs before and after diagnosis of depression in patients with unexplained pain: a retrospective cohort study using the United Kingdom General Practice Research Database. *Clinicoecon Outcomes Res* 2013; **5**: 37–47.
13. Punekar YS, Shukla A, Müllerova H. COPD management costs according to the frequency of COPD exacerbations in UK primary care. *Int J Chron Obstruct Pulmon Dis* 2014; **9**: 65–73.
14. Gulliford MC, Charlton J, Bhattarai N, Charlton C, Rudisill C. Impact and cost-effectiveness of a universal strategy to promote physical activity in primary care: population-based cohort study and Markov model. *Eur J Health Econ* 2014; **15**: 341–51.
15. Holden SE, Jenkins-Jones S, Poole CD, Morgan CL, Coghill D, Currie C. The prevalence and incidence, resource use and financial costs of treating people with attention deficit/hyperactivity disorder (ADHD) in the United Kingdom (1998 to 2010). *Child Adolesc Psychiatry Ment Health* 2013; **7**: 34.
16. Charlton J, Rudisill C, Bhattarai N, Gulliford M. Impact of deprivation on occurrence, outcomes and health care costs of people with multiple morbidity. *J Health Serv Res Policy* 2013; **18**: 215–23.
17. Hong J, Reed C, Novick D, Happich M. Costs Associated With Treatment of Chronic Low Back Pain: An Analysis of the UK General Practice Research Database. *Spine (Phila Pa 1976)* 2013; **38**: 75–82.
18. Brilleman SL, Purdy S, Salisbury C, Windmeijer F, Gravelle H, Hollinghurst S. Implications of comorbidity for primary care costs in the UK: a retrospective observational study. *Br J Gen Pract* 2013; **63**: e274–82.
19. Curtis L. [PSSRU] Unit Costs of Health and Social Care 2013. Canterbury: *Personal Social Services Research Unit, Kent*, 2013.
20. Department of Health. Reference Costs 2012-13. Available online: <https://www.gov.uk/government/publications/nhs-reference-costs-2012-to-2013> (Accessed: April 6, 2014).

- 1
  - 2
  - 3
  - 4
  - 5
  - 6
  - 7
  - 8
  - 9
  - 10
  - 11
  - 12
  - 13
  - 14
  - 15
  - 16
  - 17
  - 18
  - 19
  - 20
  - 21
  - 22
  - 23
  - 24
  - 25
  - 26
  - 27
  - 28
  - 29
  - 30
  - 31
  - 32
  - 33
  - 34
  - 35
  - 36
  - 37
  - 38
  - 39
  - 40
  - 41
  - 42
  - 43
  - 44
  - 45
  - 46
  - 47
  - 48
  - 49
  - 50
  - 51
  - 52
  - 53
  - 54
  - 55
  - 56
  - 57
  - 58
  - 59
  - 60
21. National Health Service. Reference Cost Grouper and Documentation. Available online: <http://content.digital.nhs.uk/article/4698/HRG4-201213-Reference-Costs-Grouper-and-Documentation> (Accessed: December 28, 2016).
22. Kumar K, Taylor RS, Jacques L, et al. Spinal cord stimulation versus conventional medical management for neuropathic pain: a multicentre randomised controlled trial in patients with failed back surgery syndrome. *Pain* 2007; **132**: 179–188.
23. Kumar K, Taylor RS, Jacques L, et al. The effects of spinal cord stimulation in neuropathic pain are sustained: a 24-month follow-up of the prospective randomised controlled multicenter trial of the effectiveness of spinal cord stimulation. *Neurosurgery* 2008; **63**: 762–770.
24. British National Formulary (BNF). Available online: [http://www.bnf.org/bnf/org\\_450080.htm](http://www.bnf.org/bnf/org_450080.htm) (Accessed: September 9, 2014).
25. Manca A, Kumar K, Taylor RS, et al. Quality of life, resource consumption and costs of spinal cord stimulation versus conventional medical management in neuropathic pain patients with failed back surgery syndrome (PROCESS trial). *Eur J Pain* 2008;12:1047–1058.

1  
2  
3  
4  
5  
6  
7  
8  
9  
10  
11  
12  
13  
14  
15

**Unit Costs (2013 British Pounds)**

**Table A. Unit costs of primary care**

| Type of consultation                         | Unit cost |
|----------------------------------------------|-----------|
| Clinic                                       | £66       |
| Telephone                                    | £27       |
| Out of hours /night visits/at home/emergency | £114      |
| Administrative                               | £27       |
| Surgery                                      | £45       |
| Other                                        | £66       |

Source: Curtis L. Unit Costs of Health and Social Care 2013. Canterbury, Personal Social Services Research Unit, Kent, 2013.

16  
17  
18  
19  
20  
21  
22  
23  
24  
25  
26  
27  
28  
29  
30  
31  
32  
33  
34  
35  
36  
37  
38  
39  
40  
41  
42  
43  
44  
45  
46  
47  
48  
49  
50  
51  
52  
53  
54  
55  
56  
57  
58  
59  
60

**Table B. Unit costs of outpatient attendances**

| Treatment specialty code <sup>1</sup> | First or follow up attendance | Unit cost |
|---------------------------------------|-------------------------------|-----------|
| 100                                   | 1                             | 117.83    |
| 100                                   | 2                             | 112.91    |
| 101                                   | 1                             | 106.53    |
| 101                                   | 2                             | 77.71     |
| 102                                   | 1                             | 371.32    |
| 102                                   | 2                             | 338.77    |
| 103                                   | 1                             | 129.79    |
| 103                                   | 2                             | 100.75    |
| 104                                   | 1                             | 123.48    |
| 104                                   | 2                             | 142.34    |
| 105                                   | 1                             | 218.97    |
| 105                                   | 2                             | 153.76    |
| 106                                   | 1                             | 120.58    |
| 106                                   | 2                             | 108.09    |
| 107                                   | 1                             | 236.32    |
| 107                                   | 2                             | 139.81    |
| 108                                   | 1                             | 198.73    |
| 108                                   | 2                             | 198.73    |
| 110                                   | 1                             | 107.04    |
| 110                                   | 2                             | 70.16     |
| 120                                   | 1                             | 96.54     |
| 120                                   | 2                             | 83.51     |
| 130                                   | 1                             | 163.94    |
| 130                                   | 2                             | 75.16     |
| 140                                   | 1                             | 124.67    |
| 140                                   | 2                             | 100.81    |
| 141                                   | 1                             | 170.57    |
| 141                                   | 2                             | 93.64     |
| 142                                   | 1                             | 159.98    |
| 142                                   | 2                             | 95.71     |
| 143                                   | 1                             | 156.19    |
| 143                                   | 2                             | 106.51    |
| 144                                   | 1                             | 111.03    |

|    |     |   |         |
|----|-----|---|---------|
| 1  |     |   |         |
| 2  |     |   |         |
| 3  |     |   |         |
| 4  | 144 | 2 | 117.49  |
| 5  | 145 | 1 | 198.73  |
| 6  | 145 | 2 | 198.73  |
| 7  | 148 | 1 | 198.73  |
| 8  |     |   |         |
| 9  | 150 | 1 | 194.55  |
| 10 | 150 | 2 | 135.68  |
| 11 | 160 | 1 | 99.24   |
| 12 |     |   |         |
| 13 | 160 | 2 | 62.93   |
| 14 | 161 | 1 | 265.93  |
| 15 | 161 | 2 | 211.68  |
| 16 |     |   |         |
| 17 | 170 | 1 | 308.85  |
| 18 | 170 | 2 | 304.11  |
| 19 |     |   |         |
| 20 | 171 | 1 | 4746.99 |
| 21 | 171 | 2 | 154.56  |
| 22 | 172 | 1 | 292.12  |
| 23 | 172 | 2 | 207.78  |
| 24 |     |   |         |
| 25 | 173 | 1 | 251.25  |
| 26 | 173 | 2 | 215.31  |
| 27 | 174 | 1 | 499.54  |
| 28 |     |   |         |
| 29 | 174 | 2 | 334.03  |
| 30 | 180 | 1 | 183.25  |
| 31 | 180 | 2 | 240.18  |
| 32 |     |   |         |
| 33 | 190 | 1 | 75.88   |
| 34 | 190 | 2 | 69.3    |
| 35 | 191 | 1 | 126.7   |
| 36 | 191 | 2 | 98.88   |
| 37 |     |   |         |
| 38 | 192 | 1 | 1564.27 |
| 39 | 192 | 2 | 105.87  |
| 40 |     |   |         |
| 41 | 199 | 1 | 198.73  |
| 42 | 199 | 2 | 198.73  |
| 43 | 211 | 1 | 242.18  |
| 44 | 211 | 2 | 114.72  |
| 45 |     |   |         |
| 46 | 214 | 1 | 142.05  |
| 47 | 214 | 2 | 118.04  |
| 48 | 215 | 1 | 114.82  |
| 49 | 215 | 2 | 101.02  |
| 50 |     |   |         |
| 51 | 216 | 1 | 134.6   |
| 52 | 216 | 2 | 129.33  |
| 53 | 217 | 1 | 378.76  |
| 54 | 217 | 2 | 320.99  |
| 55 | 218 | 2 | 182.7   |
| 56 |     |   |         |
| 57 | 219 | 1 | 154.25  |
| 58 | 219 | 2 | 99.17   |
| 59 |     |   |         |
| 60 | 222 | 1 | 134.98  |
|    | 251 | 1 | 148.27  |



|     |   |        |
|-----|---|--------|
| 251 | 2 | 109.13 |
| 252 | 1 | 808.96 |
| 252 | 2 | 206.14 |
| 253 | 1 | 225.36 |
| 253 | 2 | 202.28 |
| 255 | 1 | 158.35 |
| 255 | 2 | 152.29 |
| 257 | 1 | 122.58 |
| 257 | 2 | 81.29  |
| 258 | 1 | 172.74 |
| 258 | 2 | 123.73 |
| 263 | 1 | 263.09 |
| 263 | 2 | 187.77 |
| 290 | 1 | 198.73 |
| 290 | 2 | 198.73 |
| 291 | 1 | 634.2  |
| 300 | 1 | 146.55 |
| 300 | 2 | 96.03  |
| 301 | 1 | 124.89 |
| 301 | 2 | 101.07 |
| 302 | 1 | 168.86 |
| 302 | 2 | 110.76 |
| 303 | 1 | 165.82 |
| 303 | 2 | 126.05 |
| 304 | 1 | 53.89  |
| 304 | 2 | 50.71  |
| 305 | 1 | 145.79 |
| 305 | 2 | 150.83 |
| 306 | 1 | 190.9  |
| 306 | 2 | 173.07 |
| 307 | 1 | 200.18 |
| 307 | 2 | 94.83  |
| 308 | 1 | 238.45 |
| 308 | 2 | 255.3  |
| 309 | 1 | 525.32 |
| 309 | 2 | 832.36 |
| 310 | 1 | 75.62  |
| 310 | 2 | 67.67  |
| 311 | 1 | 425.08 |
| 311 | 2 | 292.45 |
| 313 | 1 | 137.1  |
| 313 | 2 | 118.89 |
| 314 | 1 | 367.82 |
| 314 | 2 | 130.29 |
| 315 | 1 | 179.78 |

1  
2  
3  
4  
5  
6  
7  
8  
9  
10  
11  
12  
13  
14  
15  
16  
17  
18  
19  
20  
21  
22  
23  
24  
25  
26  
27  
28  
29  
30  
31  
32  
33  
34  
35  
36  
37  
38  
39  
40  
41  
42  
43  
44  
45  
46  
47  
48  
49  
50  
51  
52  
53  
54  
55  
56  
57  
58  
59  
60

|     |   |         |
|-----|---|---------|
| 315 | 2 | 142.69  |
| 316 | 1 | 245.45  |
| 316 | 2 | 138.43  |
| 317 | 1 | 159.7   |
| 317 | 2 | 140.63  |
| 318 | 1 | 198.73  |
| 318 | 2 | 198.73  |
| 320 | 1 | 137.09  |
| 320 | 2 | 114.01  |
| 321 | 1 | 302.22  |
| 321 | 2 | 134.05  |
| 322 | 1 | 88.47   |
| 322 | 2 | 98.32   |
| 323 | 1 | 331.36  |
| 323 | 2 | 266.46  |
| 324 | 1 | 39.54   |
| 324 | 2 | 21.44   |
| 325 | 2 | 117.1   |
| 327 | 1 | 108.22  |
| 327 | 2 | 49.75   |
| 328 | 1 | 170.91  |
| 328 | 2 | 143.91  |
| 329 | 1 | 202.33  |
| 329 | 2 | 155.29  |
| 330 | 1 | 82.13   |
| 330 | 2 | 76.69   |
| 340 | 1 | 206.8   |
| 340 | 2 | 127.15  |
| 341 | 1 | 84.75   |
| 341 | 2 | 90.78   |
| 342 | 1 | 87.71   |
| 342 | 2 | 60.6    |
| 343 | 2 | 228.07  |
| 350 | 1 | 136.93  |
| 350 | 2 | 166.5   |
| 352 | 1 | 277.91  |
| 352 | 2 | 327.81  |
| 360 | 1 | 93.15   |
| 360 | 2 | 67.16   |
| 361 | 1 | 2206.91 |
| 361 | 2 | 138.42  |
| 370 | 1 | 112.27  |
| 370 | 2 | 96.08   |
| 371 | 1 | 122.12  |
| 371 | 2 | 686.83  |

|    |     |   |        |
|----|-----|---|--------|
| 1  |     |   |        |
| 2  |     |   |        |
| 3  |     |   |        |
| 4  | 400 | 1 | 188.02 |
| 5  | 400 | 2 | 131.33 |
| 6  | 401 | 1 | 425.93 |
| 7  | 401 | 2 | 160.19 |
| 8  |     |   |        |
| 9  | 410 | 1 | 155.13 |
| 10 | 410 | 2 | 110.46 |
| 11 | 420 | 1 | 134.13 |
| 12 |     |   |        |
| 13 | 420 | 2 | 135.54 |
| 14 | 421 | 1 | 567.67 |
| 15 | 421 | 2 | 389.2  |
| 16 |     |   |        |
| 17 | 422 | 2 | 191.85 |
| 18 | 430 | 1 | 212.26 |
| 19 | 430 | 2 | 185.11 |
| 20 |     |   |        |
| 21 | 450 | 1 | 195.36 |
| 22 | 450 | 2 | 121.81 |
| 23 |     |   |        |
| 24 | 460 | 1 | 167.95 |
| 25 | 460 | 2 | 166.26 |
| 26 | 499 | 1 | 198.73 |
| 27 | 499 | 2 | 198.73 |
| 28 |     |   |        |
| 29 | 501 | 1 | 110.93 |
| 30 | 501 | 2 | 89.39  |
| 31 | 502 | 1 | 117.31 |
| 32 | 502 | 2 | 93.87  |
| 33 |     |   |        |
| 34 | 503 | 1 | 229.88 |
| 35 | 503 | 2 | 231.8  |
| 36 |     |   |        |
| 37 | 560 | 1 | 75.7   |
| 38 | 560 | 2 | 66.44  |
| 39 | 600 | 1 | 198.73 |
| 40 |     |   |        |
| 41 | 620 | 1 | 198.73 |
| 42 | 650 | 1 | 54.95  |
| 43 | 650 | 2 | 41.56  |
| 44 |     |   |        |
| 45 | 651 | 1 | 84.46  |
| 46 | 651 | 2 | 71.15  |
| 47 | 652 | 1 | 78.15  |
| 48 | 652 | 2 | 51.01  |
| 49 |     |   |        |
| 50 | 653 | 1 | 66.4   |
| 51 | 653 | 2 | 61.9   |
| 52 |     |   |        |
| 53 | 654 | 1 | 73.24  |
| 54 | 654 | 2 | 74.03  |
| 55 | 655 | 1 | 53.07  |
| 56 | 655 | 2 | 54.2   |
| 57 |     |   |        |
| 58 | 656 | 1 | 169.03 |
| 59 | 656 | 2 | 120.2  |
| 60 | 657 | 2 | 198.73 |
|    | 658 | 1 | 198.73 |

1  
2  
3  
4  
5  
6  
7  
8  
9  
10  
11  
12  
13  
14  
15  
16  
17  
18  
19  
20  
21  
22  
23  
24  
25  
26  
27  
28  
29  
30  
31  
32  
33  
34  
35  
36  
37  
38  
39  
40  
41  
42  
43  
44  
45  
46  
47  
48  
49  
50  
51  
52  
53  
54  
55  
56  
57  
58  
59  
60

|     |   |        |
|-----|---|--------|
| 658 | 2 | 198.73 |
| 662 | 1 | 62.65  |
| 662 | 2 | 63.94  |
| 700 | 1 | 198.73 |
| 700 | 2 | 198.73 |
| 710 | 1 | 226.27 |
| 710 | 2 | 129.04 |
| 711 | 1 | 529.63 |
| 711 | 2 | 267.51 |
| 712 | 1 | 198.73 |
| 712 | 2 | 198.73 |
| 713 | 1 | 232.48 |
| 713 | 2 | 456.92 |
| 715 | 1 | 8.92   |
| 715 | 2 | 198.73 |
| 721 | 1 | 198.73 |
| 721 | 2 | 198.73 |
| 722 | 1 | 90.12  |
| 722 | 2 | 136.53 |
| 800 | 1 | 130.99 |
| 800 | 2 | 92.94  |
| 810 | 1 | 198.73 |
| 810 | 2 | 198.73 |
| 811 | 1 | 119.98 |
| 811 | 2 | 403.02 |
| 812 | 1 | 61.26  |
| 812 | 2 | 30.97  |
| 820 | 1 | 198.73 |
| 820 | 2 | 198.73 |
| 822 | 1 | 80.6   |
| 822 | 2 | 73.21  |
| 823 | 1 | 198.73 |
| 823 | 2 | 198.73 |
| 824 | 1 | 198.73 |
| 830 | 1 | 198.73 |
| 830 | 2 | 198.73 |
| 831 | 1 | 198.73 |
| 831 | 2 | 198.73 |
| 840 | 1 | 82.99  |
| 840 | 2 | 70.27  |
| 900 | 1 | 198.73 |
| 900 | 2 | 198.73 |
| 901 | 1 | 198.73 |
| 901 | 2 | 198.73 |
| 902 | 1 | 198.73 |

|     |   |        |
|-----|---|--------|
| 902 | 2 | 198.73 |
| 904 | 1 | 198.73 |
| 904 | 2 | 198.73 |
| 950 | 1 | 198.73 |
| 950 | 2 | 198.73 |
| 960 | 1 | 198.73 |
| 960 | 2 | 198.73 |

Source: Department of Health. Reference Costs 2012-13. Available online: <https://www.gov.uk/government/publications/nhs-reference-costs-2012-to-2013>.

Note(1): For a description for specialty codes see: <https://www.gov.uk/government/collections/nhs-reference-costs>.

For peer review only

Table C. Unit costs of outpatient procedures

| Treatment specialty code <sup>1</sup> | First or follow up attendance | Unit Cost |
|---------------------------------------|-------------------------------|-----------|
| 100                                   | 1                             | \$207.24  |
| 100                                   | 2                             | \$207.24  |
| 101                                   | 1                             | \$149.80  |
| 101                                   | 2                             | \$149.80  |
| 102                                   | 1                             | \$316.02  |
| 102                                   | 2                             | \$316.02  |
| 103                                   | 1                             | \$183.41  |
| 103                                   | 2                             | \$183.41  |
| 104                                   | 1                             | \$173.56  |
| 104                                   | 2                             | \$173.56  |
| 105                                   | 1                             | \$253.18  |
| 105                                   | 2                             | \$253.18  |
| 106                                   | 1                             | \$152.52  |
| 106                                   | 2                             | \$152.52  |
| 107                                   | 1                             | \$168.42  |
| 107                                   | 2                             | \$168.42  |
| 110                                   | 1                             | \$150.11  |
| 110                                   | 2                             | \$150.11  |
| 120                                   | 1                             | \$143.16  |
| 120                                   | 2                             | \$143.16  |
| 130                                   | 1                             | \$132.29  |
| 130                                   | 2                             | \$132.29  |
| 140                                   | 1                             | \$202.87  |
| 140                                   | 2                             | \$202.87  |
| 141                                   | 1                             | \$182.03  |
| 141                                   | 2                             | \$182.03  |
| 143                                   | 1                             | \$146.28  |
| 143                                   | 2                             | \$146.28  |
| 144                                   | 1                             | \$174.41  |
| 144                                   | 2                             | \$174.41  |
| 150                                   | 1                             | \$202.90  |
| 150                                   | 2                             | \$202.90  |
| 160                                   | 1                             | \$138.64  |
| 160                                   | 2                             | \$138.64  |
| 161                                   | 2                             | \$171.23  |
| 170                                   | 1                             | \$198.98  |
| 170                                   | 2                             | \$198.98  |
| 172                                   | 1                             | \$208.25  |
| 172                                   | 2                             | \$208.25  |
| 173                                   | 1                             | \$260.51  |
| 173                                   | 2                             | \$260.51  |
| 174                                   | 2                             | \$468.09  |
| 180                                   | 1                             | \$137.83  |

|     |   |            |
|-----|---|------------|
| 180 | 2 | \$137.83   |
| 190 | 1 | \$100.33   |
| 190 | 2 | \$100.33   |
| 191 | 1 | \$137.73   |
| 191 | 2 | \$137.73   |
| 211 | 2 | \$82.55    |
| 214 | 1 | \$117.67   |
| 214 | 2 | \$117.67   |
| 215 | 1 | \$128.13   |
| 215 | 2 | \$128.13   |
| 216 | 1 | \$163.31   |
| 216 | 2 | \$163.31   |
| 219 | 1 | \$115.64   |
| 252 | 2 | \$387.87   |
| 253 | 2 | \$229.43   |
| 255 | 1 | \$190.98   |
| 255 | 2 | \$190.98   |
| 257 | 1 | \$113.60   |
| 257 | 2 | \$113.60   |
| 258 | 1 | \$139.67   |
| 258 | 2 | \$139.67   |
| 263 | 2 | \$389.56   |
| 300 | 1 | \$201.64   |
| 300 | 2 | \$201.64   |
| 301 | 1 | \$213.32   |
| 301 | 2 | \$213.32   |
| 302 | 1 | \$201.80   |
| 302 | 2 | \$201.80   |
| 303 | 1 | \$191.08   |
| 303 | 2 | \$191.08   |
| 304 | 1 | \$87.00    |
| 304 | 2 | \$87.00    |
| 306 | 1 | \$279.18   |
| 306 | 2 | \$279.18   |
| 307 | 1 | \$184.33   |
| 307 | 2 | \$184.33   |
| 308 | 1 | \$3,808.25 |
| 308 | 2 | \$3,808.25 |
| 310 | 1 | \$199.79   |
| 310 | 2 | \$199.79   |
| 311 | 2 | \$312.55   |
| 313 | 1 | \$129.23   |
| 313 | 2 | \$129.23   |
| 314 | 1 | \$310.94   |
| 314 | 2 | \$310.94   |

|    |     |   |          |
|----|-----|---|----------|
| 1  |     |   |          |
| 2  |     |   |          |
| 3  | 315 | 1 | \$218.81 |
| 4  | 316 | 1 | \$238.93 |
| 5  |     |   |          |
| 6  | 316 | 2 | \$238.93 |
| 7  | 317 | 1 | \$201.90 |
| 8  |     |   |          |
| 9  | 317 | 2 | \$201.90 |
| 10 | 320 | 1 | \$161.38 |
| 11 | 320 | 2 | \$161.38 |
| 12 |     |   |          |
| 13 | 321 | 1 | \$217.81 |
| 14 | 323 | 1 | \$202.51 |
| 15 |     |   |          |
| 16 | 323 | 2 | \$202.51 |
| 17 | 324 | 1 | \$75.75  |
| 18 | 324 | 2 | \$75.75  |
| 19 |     |   |          |
| 20 | 327 | 1 | \$254.11 |
| 21 | 327 | 2 | \$254.11 |
| 22 |     |   |          |
| 23 | 328 | 1 | \$274.25 |
| 24 | 328 | 2 | \$274.25 |
| 25 |     |   |          |
| 26 | 329 | 1 | \$151.74 |
| 27 | 329 | 2 | \$151.74 |
| 28 |     |   |          |
| 29 | 330 | 1 | \$144.10 |
| 30 | 330 | 2 | \$144.10 |
| 31 |     |   |          |
| 32 | 340 | 1 | \$183.78 |
| 33 | 340 | 2 | \$183.78 |
| 34 |     |   |          |
| 35 | 341 | 1 | \$129.66 |
| 36 | 341 | 2 | \$129.66 |
| 37 |     |   |          |
| 38 | 342 | 1 | \$133.03 |
| 39 | 342 | 2 | \$133.03 |
| 40 |     |   |          |
| 41 | 350 | 1 | \$220.19 |
| 42 | 350 | 2 | \$220.19 |
| 43 |     |   |          |
| 44 | 352 | 1 | \$321.96 |
| 45 |     |   |          |
| 46 | 360 | 1 | \$255.02 |
| 47 | 360 | 2 | \$255.02 |
| 48 |     |   |          |
| 49 | 361 | 1 | \$714.11 |
| 50 | 361 | 2 | \$714.11 |
| 51 |     |   |          |
| 52 | 370 | 1 | \$216.20 |
| 53 | 370 | 2 | \$216.20 |
| 54 |     |   |          |
| 55 | 371 | 2 | \$145.89 |
| 56 |     |   |          |
| 57 | 400 | 1 | \$227.56 |
| 58 | 400 | 2 | \$227.56 |
| 59 |     |   |          |
| 60 | 401 | 1 | \$168.22 |
|    | 401 | 2 | \$168.22 |
|    |     |   |          |
|    | 410 | 1 | \$155.89 |
|    | 410 | 2 | \$155.89 |
|    |     |   |          |
|    | 420 | 1 | \$204.63 |
|    | 420 | 2 | \$204.63 |
|    |     |   |          |
|    | 430 | 1 | \$225.07 |



|     |   |          |
|-----|---|----------|
| 430 | 2 | \$225.07 |
| 450 | 1 | \$248.44 |
| 450 | 2 | \$248.44 |
| 460 | 1 | \$135.57 |
| 460 | 2 | \$135.57 |
| 501 | 1 | \$169.90 |
| 501 | 2 | \$169.90 |
| 502 | 1 | \$209.90 |
| 502 | 2 | \$209.90 |
| 503 | 1 | \$171.64 |
| 503 | 2 | \$171.64 |
| 560 | 1 | \$137.23 |
| 560 | 2 | \$137.23 |
| 650 | 1 | \$204.29 |
| 650 | 2 | \$204.29 |
| 651 | 1 | \$390.57 |
| 651 | 2 | \$390.57 |
| 652 | 1 | \$278.72 |
| 652 | 2 | \$278.72 |
| 653 | 1 | \$298.24 |
| 653 | 2 | \$298.24 |
| 654 | 1 | \$535.00 |
| 654 | 2 | \$535.00 |
| 655 | 1 | \$141.38 |
| 655 | 2 | \$141.38 |
| 656 | 1 | \$116.18 |
| 656 | 2 | \$116.18 |
| 662 | 1 | \$101.20 |
| 662 | 2 | \$101.20 |
| 710 | 1 | \$739.15 |
| 710 | 2 | \$739.15 |
| 713 | 1 | \$96.61  |
| 800 | 1 | \$240.80 |
| 800 | 2 | \$240.80 |
| 811 | 1 | \$487.37 |
| 811 | 2 | \$487.37 |
| 812 | 1 | \$176.07 |
| 812 | 2 | \$176.07 |
| 822 | 1 | \$51.08  |
| 822 | 2 | \$51.08  |
| 840 | 1 | \$232.49 |
| 840 | 2 | \$232.49 |

Source: Department of Health. Reference Costs 2012-13. Available online: <https://www.gov.uk/government/publications/nhs-reference-costs-2012-to-2013>.

Note(1): For a description for specialty codes, see: <https://www.gov.uk/government/collections/nhs-reference-costs>.

Table D. Inpatient unit costs by HRG

| FCE_HRG | Unit Cost  |
|---------|------------|
| AA02C   | £13,543.69 |
| AA02D   | £9,098.19  |
| AA02E   | £14,942.99 |
| AA03C   | £10,996.12 |
| AA03D   | £5,129.92  |
| AA04C   | £16,033.24 |
| AA05D   | £8,433.21  |
| AA06C   | £17,411.32 |
| AA06E   | £8,824.69  |
| AA06F   | £8,115.05  |
| AA07C   | £13,079.18 |
| AA07D   | £14,303.06 |
| AA08C   | £6,390.61  |
| AA08D   | £7,680.18  |
| AA09C   | £14,803.38 |
| AA09D   | £7,495.31  |
| AA09E   | £6,550.19  |
| AA10Z   | £7,587.79  |
| AA11Z   | £11,682.94 |
| AA12C   | £3,837.17  |
| AA12D   | £8,361.61  |
| AA12E   | £6,777.98  |
| AA13C   | £9,904.20  |
| AA13D   | £7,445.59  |
| AA14Z   | £4,991.88  |
| AA15C   | £10,826.07 |
| AA15D   | £8,081.22  |
| AA15E   | £7,780.20  |
| AA16Z   | £16,019.03 |
| AA17C   | £13,293.07 |
| AA17D   | £10,625.08 |
| AA18C   | £7,801.23  |
| AA18D   | £5,120.91  |
| AA19D   | £430.38    |
| AA19E   | £4,908.06  |
| AA20C   | £5,435.30  |
| AA20D   | £1,500.60  |
| AA21C   | £3,978.43  |
| AA21D   | £7,093.43  |
| AA21E   | £807.06    |
| AA21F   | £5,543.01  |
| AA21G   | £869.99    |
| AA22C   | £7,390.09  |

|       |           |
|-------|-----------|
| AA22D | £4,932.54 |
| AA22E | £4,022.77 |
| AA22F | £2,315.96 |
| AA22G | £2,302.17 |
| AA23D | £5,085.44 |
| AA23E | £3,408.37 |
| AA23F | £3,091.88 |
| AA23G | £759.46   |
| AA24C | £5,670.86 |
| AA24D | £4,219.40 |
| AA24E | £564.33   |
| AA24F | £2,785.07 |
| AA24G | £2,394.94 |
| AA24H | £619.48   |
| AA25C | £6,997.51 |
| AA25D | £4,458.37 |
| AA25E | £3,208.93 |
| AA25F | £507.84   |
| AA25G | £509.60   |
| AA26C | £6,545.97 |
| AA26D | £4,241.63 |
| AA26E | £2,871.27 |
| AA26F | £496.75   |
| AA26G | £488.50   |
| AA26H | £432.32   |
| AA27Z | £4,322.88 |
| AA28C | £5,714.13 |
| AA28D | £450.69   |
| AA28E | £2,395.84 |
| AA28F | £1,821.09 |
| AA29C | £2,966.01 |
| AA29D | £1,979.55 |
| AA29E | £1,538.58 |
| AA29F | £508.78   |
| AA30C | £3,103.55 |
| AA30D | £2,218.05 |
| AA30E | £2,673.24 |
| AA30F | £2,177.01 |
| AA31C | £1,981.18 |
| AA31D | £2,978.14 |
| AA31E | £1,115.47 |
| AA32Z | £328.94   |
| AA33C | £537.33   |
| AA34C | £1,432.92 |
| AA34D | £1,405.95 |

|    |       |            |
|----|-------|------------|
| 1  |       |            |
| 2  |       |            |
| 3  |       |            |
| 4  | AA35A | £10,431.32 |
| 5  | AA35B | £11,333.42 |
| 6  | AA35C | £5,727.76  |
| 7  | AA35D | £4,024.58  |
| 8  | AA35E | £3,123.14  |
| 9  | AA35F | £2,757.17  |
| 10 | AA37Z | £5,109.45  |
| 11 | AA38Z | £15,151.50 |
| 12 | AB02Z | £904.97    |
| 13 | AB03Z | £827.35    |
| 14 | AB04Z | £704.04    |
| 15 | AB05Z | £570.44    |
| 16 | AB06Z | £619.59    |
| 17 | AB07Z | £11,122.03 |
| 18 | AB08Z | £667.16    |
| 19 | AB09Z | £575.49    |
| 20 | AB10Z | £508.69    |
| 21 | AB11Z | £155.77    |
| 22 | BZ01A | £1,124.52  |
| 23 | BZ01B | £1,109.53  |
| 24 | BZ02A | £1,574.51  |
| 25 | BZ02B | £887.91    |
| 26 | BZ02C | £865.82    |
| 27 | BZ03A | £1,006.92  |
| 28 | BZ03B | £981.66    |
| 29 | BZ04A | £323.46    |
| 30 | BZ04B | £262.68    |
| 31 | BZ05A | £2,445.85  |
| 32 | BZ05B | £3,059.31  |
| 33 | BZ06B | £2,069.08  |
| 34 | BZ06C | £1,088.93  |
| 35 | BZ06D | £970.28    |
| 36 | BZ07B | £918.10    |
| 37 | BZ07C | £5,370.68  |
| 38 | BZ07D | £793.54    |
| 39 | BZ07E | £676.73    |
| 40 | BZ08C | £4,056.93  |
| 41 | BZ08D | £2,845.03  |
| 42 | BZ09C | £1,388.89  |
| 43 | BZ09D | £1,387.95  |
| 44 | BZ10C | £658.41    |
| 45 | BZ10D | £614.48    |
| 46 | BZ11A | £5,105.46  |
| 47 | BZ11B | £2,473.14  |
| 48 | BZ12A | £2,645.63  |
| 49 |       |            |
| 50 |       |            |
| 51 |       |            |
| 52 |       |            |
| 53 |       |            |
| 54 |       |            |
| 55 |       |            |
| 56 |       |            |
| 57 |       |            |
| 58 |       |            |
| 59 |       |            |
| 60 |       |            |

|       |            |
|-------|------------|
| BZ12B | £2,394.69  |
| BZ13A | £1,969.42  |
| BZ13B | £952.30    |
| BZ14A | £1,573.42  |
| BZ15C | £1,335.33  |
| BZ15D | £1,273.00  |
| BZ16A | £1,216.46  |
| BZ17A | £1,592.26  |
| BZ17B | £2,275.41  |
| BZ18A | £1,077.58  |
| BZ18B | £1,139.77  |
| BZ19A | £609.27    |
| BZ19B | £403.55    |
| BZ20A | £2,323.62  |
| BZ20B | £2,270.07  |
| BZ21A | £3,286.41  |
| BZ21B | £2,128.24  |
| BZ21C | £2,089.76  |
| BZ22A | £989.08    |
| BZ22B | £4,276.26  |
| BZ23Z | £1,380.31  |
| BZ24D | £2,960.73  |
| BZ24E | £2,491.24  |
| BZ24F | £396.58    |
| BZ24G | £363.46    |
| CZ01V | £3,310.76  |
| CZ01Y | £1,713.06  |
| CZ02T | £2,074.72  |
| CZ02W | £841.34    |
| CZ02X | £1,726.61  |
| CZ02Y | £620.22    |
| CZ03V | £3,325.97  |
| CZ03Y | £2,926.86  |
| CZ04P | £13,947.08 |
| CZ04Q | £10,048.87 |
| CZ05S | £1,700.15  |
| CZ05T | £1,481.12  |
| CZ05V | £1,607.39  |
| CZ05Y | £1,154.04  |
| CZ07O | £9,572.39  |
| CZ07P | £5,920.08  |
| CZ07Q | £6,080.67  |
| CZ08S | £960.16    |
| CZ08T | £847.88    |
| CZ08V | £772.64    |

|    |       |            |
|----|-------|------------|
| 1  |       |            |
| 2  |       |            |
| 3  |       |            |
| 4  | CZ08Y | £740.72    |
| 5  | CZ09U | £2,774.15  |
| 6  | CZ09V | £2,550.10  |
| 7  | CZ09Y | £1,040.91  |
| 8  |       |            |
| 9  | CZ10U | £2,990.26  |
| 10 | CZ10V | £2,952.58  |
| 11 | CZ10Y | £2,917.72  |
| 12 |       |            |
| 13 | CZ11Z | £5,538.98  |
| 14 | CZ12U | £770.65    |
| 15 | CZ12V | £1,494.26  |
| 16 | CZ12Y | £627.38    |
| 17 |       |            |
| 18 | CZ13U | £1,679.89  |
| 19 | CZ13V | £1,821.94  |
| 20 | CZ13Y | £1,232.52  |
| 21 |       |            |
| 22 | CZ14U | £2,684.40  |
| 23 | CZ14V | £2,324.79  |
| 24 | CZ14Y | £2,308.36  |
| 25 |       |            |
| 26 | CZ15N | £3,253.82  |
| 27 | CZ15Q | £3,323.56  |
| 28 |       |            |
| 29 | CZ16N | £2,121.04  |
| 30 | CZ16Q | £2,098.25  |
| 31 | CZ17U | £3,631.39  |
| 32 | CZ17V | £4,167.67  |
| 33 | CZ17Y | £1,076.59  |
| 34 |       |            |
| 35 | CZ18R | £5,276.95  |
| 36 | CZ19Z | £8,743.50  |
| 37 |       |            |
| 38 | CZ21V | £1,211.53  |
| 39 | CZ21Y | £450.63    |
| 40 |       |            |
| 41 | CZ22W | £2,042.00  |
| 42 | CZ22X | £475.68    |
| 43 | CZ22Y | £490.02    |
| 44 |       |            |
| 45 | CZ23W | £2,767.72  |
| 46 | CZ23X | £425.39    |
| 47 | CZ23Y | £462.17    |
| 48 |       |            |
| 49 | CZ24O | £5,062.41  |
| 50 | CZ24P | £1,839.99  |
| 51 | CZ24Q | £1,682.02  |
| 52 |       |            |
| 53 | CZ25A | £21,234.63 |
| 54 | CZ27Z | £2,883.18  |
| 55 | CZ28Z | £3,854.04  |
| 56 |       |            |
| 57 | CZ30Y | £406.03    |
| 58 | CZ31Y | £394.31    |
| 59 | CZ32Y | £505.20    |
| 60 | CZ33Y | £534.06    |
|    | CZ34Y | £444.10    |

|       |            |
|-------|------------|
| CZ37U | £863.39    |
| CZ37Y | £533.18    |
| CZ38Y | £358.12    |
| CZ39U | £1,005.08  |
| CZ39Y | £818.58    |
| CZ40Y | £681.47    |
| CZ41U | £935.45    |
| CZ41Y | £771.78    |
| CZ42U | £698.00    |
| CZ42Y | £1,720.18  |
| DZ02D | £11,314.15 |
| DZ02E | £8,231.01  |
| DZ02F | £6,988.70  |
| DZ02G | £6,230.44  |
| DZ06Z | £972.56    |
| DZ07A | £630.26    |
| DZ07B | £1,358.95  |
| DZ08Z | £1,220.91  |
| DZ09D | £4,418.94  |
| DZ09E | £3,223.47  |
| DZ09F | £2,491.66  |
| DZ09G | £1,940.38  |
| DZ09H | £464.93    |
| DZ10E | £5,451.32  |
| DZ10F | £608.73    |
| DZ10G | £502.65    |
| DZ11D | £5,484.90  |
| DZ11E | £4,135.26  |
| DZ11F | £4,218.80  |
| DZ11G | £2,315.80  |
| DZ11H | £484.40    |
| DZ11J | £1,374.20  |
| DZ12C | £486.49    |
| DZ12D | £468.78    |
| DZ12E | £2,166.80  |
| DZ12F | £2,073.32  |
| DZ13A | £0.00      |
| DZ13B | £0.00      |
| DZ14C | £4,061.79  |
| DZ14D | £3,188.14  |
| DZ14E | £568.87    |
| DZ15G | £1,596.80  |
| DZ15H | £2,522.95  |
| DZ15J | £1,804.60  |
| DZ15K | £435.23    |

|       |           |
|-------|-----------|
| DZ15L | £413.76   |
| DZ16E | £3,000.27 |
| DZ16F | £514.36   |
| DZ16G | £1,765.57 |
| DZ17E | £4,098.24 |
| DZ17F | £3,183.93 |
| DZ17G | £2,680.99 |
| DZ17H | £502.54   |
| DZ17J | £1,599.15 |
| DZ17K | £586.05   |
| DZ18B | £751.07   |
| DZ18C | £700.20   |
| DZ19D | £446.58   |
| DZ19E | £1,610.16 |
| DZ19F | £431.65   |
| DZ19G | £408.33   |
| DZ20A | £3,002.65 |
| DZ20B | £490.85   |
| DZ20C | £1,664.30 |
| DZ21A | £427.38   |
| DZ21M | £3,374.69 |
| DZ21N | £2,305.75 |
| DZ21P | £2,015.09 |
| DZ21Q | £692.34   |
| DZ21R | £2,993.25 |
| DZ21S | £606.43   |
| DZ21T | £505.73   |
| DZ21U | £1,459.17 |
| DZ22D | £4,803.90 |
| DZ22E | £3,418.05 |
| DZ22F | £2,486.32 |
| DZ22G | £469.13   |
| DZ22H | £1,450.76 |
| DZ22J | £391.85   |
| DZ23E | £3,226.48 |
| DZ23F | £2,174.92 |
| DZ23G | £1,625.01 |
| DZ24D | £5,787.51 |
| DZ24E | £4,282.12 |
| DZ24F | £3,140.59 |
| DZ24G | £578.16   |
| DZ24H | £450.46   |
| DZ25C | £3,095.55 |
| DZ25D | £509.53   |
| DZ25E | £519.49   |



|       |            |
|-------|------------|
| DZ25F | £581.11    |
| DZ26C | £3,795.37  |
| DZ26D | £2,187.89  |
| DZ26E | £1,930.52  |
| DZ26F | £462.29    |
| DZ27G | £3,251.14  |
| DZ27H | £3,887.07  |
| DZ27J | £2,806.15  |
| DZ27K | £1,097.13  |
| DZ27L | £1,620.63  |
| DZ28A | £393.83    |
| DZ28B | £964.57    |
| DZ29C | £5,647.22  |
| DZ29D | £2,140.23  |
| DZ29E | £2,146.28  |
| DZ29F | £1,890.68  |
| DZ30Z | £400.44    |
| DZ37A | £1,211.51  |
| DZ38Z | £338.22    |
| DZ39Z | £0.00      |
| DZ40Z | £582.91    |
| DZ44Z | £738.51    |
| DZ49Z | £114.14    |
| DZ50Z | £675.07    |
| DZ51Z | £19,257.08 |
| DZ53A | £7,648.90  |
| DZ53B | £5,152.55  |
| DZ53C | £4,134.64  |
| DZ53D | £1,011.87  |
| DZ53E | £3,512.05  |
| DZ53F | £3,377.67  |
| DZ54Z | £2,950.88  |
| EA02Z | £46,293.95 |
| EA03A | £1,418.75  |
| EA03B | £5,610.75  |
| EA03C | £1,964.40  |
| EA03D | £1,844.97  |
| EA03E | £2,659.07  |
| EA05A | £7,438.96  |
| EA05B | £5,095.11  |
| EA05C | £2,177.15  |
| EA05D | £1,994.17  |
| EA07B | £4,846.77  |
| EA07C | £5,096.04  |
| EA11B | £1,630.04  |

|    |       |            |
|----|-------|------------|
| 1  |       |            |
| 2  |       |            |
| 3  | EA12B | £14,777.82 |
| 4  | EA12C | £14,528.01 |
| 5  | EA12D | £13,905.13 |
| 6  | EA14A | £14,538.70 |
| 7  | EA14B | £10,487.59 |
| 8  | EA14C | £8,991.28  |
| 9  | EA14D | £8,622.56  |
| 10 | EA16A | £12,763.86 |
| 11 | EA16B | £10,687.50 |
| 12 | EA16C | £9,983.10  |
| 13 | EA16D | £9,172.70  |
| 14 | EA17A | £13,173.21 |
| 15 | EA17B | £11,208.21 |
| 16 | EA17C | £9,696.82  |
| 17 | EA17D | £467.44    |
| 18 | EA19B | £11,722.26 |
| 19 | EA19C | £10,750.08 |
| 20 | EA20A | £18,302.57 |
| 21 | EA20B | £12,150.96 |
| 22 | EA20C | £9,542.71  |
| 23 | EA22Z | £13,738.01 |
| 24 | EA29A | £5,904.41  |
| 25 | EA29B | £5,025.82  |
| 26 | EA29C | £2,820.75  |
| 27 | EA31A | £7,214.31  |
| 28 | EA31B | £2,192.49  |
| 29 | EA31C | £3,237.70  |
| 30 | EA31D | £1,970.40  |
| 31 | EA35A | £5,597.66  |
| 32 | EA35B | £3,896.24  |
| 33 | EA35C | £1,462.02  |
| 34 | EA35D | £1,617.66  |
| 35 | EA36D | £5,695.43  |
| 36 | EA36E | £1,128.29  |
| 37 | EA36F | £2,325.68  |
| 38 | EA36G | £1,038.78  |
| 39 | EA36H | £1,618.88  |
| 40 | EA39A | £6,794.69  |
| 41 | EA39B | £1,992.40  |
| 42 | EA39C | £4,177.28  |
| 43 | EA40Z | £1,085.85  |
| 44 | EA44A | £798.64    |
| 45 | EA44B | £824.66    |
| 46 | EA45Z | £718.96    |
| 47 | EA47Z | £1,353.19  |
| 48 |       |            |
| 49 |       |            |
| 50 |       |            |
| 51 |       |            |
| 52 |       |            |
| 53 |       |            |
| 54 |       |            |
| 55 |       |            |
| 56 |       |            |
| 57 |       |            |
| 58 |       |            |
| 59 |       |            |
| 60 |       |            |

|       |            |
|-------|------------|
| EA48Z | £3,167.03  |
| EA49A | £7,769.81  |
| EA49B | £5,196.60  |
| EA49C | £2,980.40  |
| EA49D | £2,435.71  |
| EA51A | £15,158.11 |
| EA51B | £12,797.00 |
| EA51C | £11,391.21 |
| EA51D | £10,836.08 |
| EA52A | £18,634.08 |
| EA52B | £13,979.79 |
| EA52C | £12,498.92 |
| EA53Z | £15,953.72 |
| EA54A | £3,227.00  |
| EA54B | £3,128.34  |
| EA55B | £1,789.23  |
| EA56A | £18,143.90 |
| EA56B | £16,681.16 |
| EA56C | £14,173.03 |
| EA57A | £6,310.53  |
| EB02B | £3,914.06  |
| EB02C | £805.79    |
| EB03A | £4,509.35  |
| EB03B | £3,676.84  |
| EB03C | £506.59    |
| EB03D | £2,668.50  |
| EB03E | £1,875.30  |
| EB04Z | £463.66    |
| EB05A | £2,874.35  |
| EB05B | £2,184.22  |
| EB05C | £1,528.41  |
| EB06A | £4,298.50  |
| EB06B | £3,799.20  |
| EB06C | £2,859.23  |
| EB06D | £537.84    |
| EB07A | £3,670.91  |
| EB07B | £617.13    |
| EB07C | £1,829.87  |
| EB07D | £501.89    |
| EB07E | £805.06    |
| EB08A | £3,016.30  |
| EB08B | £2,126.28  |
| EB08C | £1,691.46  |
| EB08D | £436.89    |
| EB08E | £405.77    |

|    |       |           |
|----|-------|-----------|
| 1  |       |           |
| 2  |       |           |
| 3  |       |           |
| 4  | EB09A | £3,729.99 |
| 5  | EB09B | £1,837.16 |
| 6  | EB10B | £2,974.30 |
| 7  | EB10C | £2,294.84 |
| 8  | EB10D | £1,886.80 |
| 9  | EB10E | £1,555.21 |
| 10 | EB12A | £1,719.22 |
| 11 | EB12B | £443.72   |
| 12 | EB12C | £1,036.67 |
| 13 | EB13A | £1,422.71 |
| 14 | EB13B | £1,773.75 |
| 15 | EB13C | £464.16   |
| 16 | EB13D | £1,091.92 |
| 17 | EB14A | £4,443.94 |
| 18 | EB14B | £3,312.24 |
| 19 | EB14C | £2,524.94 |
| 20 | EB14D | £1,935.82 |
| 21 | EB14E | £539.63   |
| 22 | EB15B | £2,589.81 |
| 23 | EB15C | £1,941.99 |
| 24 | EC01A | £2,098.70 |
| 25 | EC01B | £2,588.05 |
| 26 | EC02A | £7,984.42 |
| 27 | FZ12L | £9,926.15 |
| 28 | FZ12M | £6,904.52 |
| 29 | FZ12N | £1,531.42 |
| 30 | FZ12P | £4,318.22 |
| 31 | FZ12Q | £3,657.44 |
| 32 | FZ12S | £4,580.50 |
| 33 | FZ13C | £852.44   |
| 34 | FZ13D | £1,870.37 |
| 35 | FZ17E | £4,799.16 |
| 36 | FZ17F | £3,478.78 |
| 37 | FZ17G | £2,815.51 |
| 38 | FZ18E | £1,315.66 |
| 39 | FZ18G | £4,801.34 |
| 40 | FZ18H | £1,475.10 |
| 41 | FZ18J | £2,118.05 |
| 42 | FZ18K | £1,957.43 |
| 43 | FZ19A | £1,765.75 |
| 44 | FZ20F | £5,792.05 |
| 45 | FZ20G | £4,027.75 |
| 46 | FZ20H | £3,110.30 |
| 47 | FZ20J | £2,762.36 |
| 48 | FZ20M | £2,928.55 |
| 49 |       |           |
| 50 |       |           |
| 51 |       |           |
| 52 |       |           |
| 53 |       |           |
| 54 |       |           |
| 55 |       |           |
| 56 |       |           |
| 57 |       |           |
| 58 |       |           |
| 59 |       |           |
| 60 |       |           |

|       |           |
|-------|-----------|
| FZ21C | £1,325.98 |
| FZ21D | £1,890.25 |
| FZ22B | £1,847.29 |
| FZ22C | £3,143.31 |
| FZ22D | £1,907.46 |
| FZ22E | £1,428.31 |
| FZ23A | £1,230.76 |
| FZ23B | £843.25   |
| FZ24G | £622.64   |
| FZ24H | £758.74   |
| FZ24J | £614.50   |
| FZ27E | £5,649.44 |
| FZ27F | £3,727.83 |
| FZ27G | £2,464.19 |
| FZ36G | £7,347.12 |
| FZ36J | £5,089.85 |
| FZ36K | £3,294.86 |
| FZ36L | £2,265.82 |
| FZ36M | £3,430.86 |
| FZ36N | £496.42   |
| FZ36P | £1,897.11 |
| FZ36Q | £440.45   |
| FZ37K | £8,305.66 |
| FZ37L | £4,449.85 |
| FZ37M | £4,244.10 |
| FZ37N | £2,733.89 |
| FZ37P | £476.43   |
| FZ37Q | £1,871.80 |
| FZ37R | £1,550.46 |
| FZ37S | £1,415.93 |
| FZ38G | £4,785.82 |
| FZ38H | £2,929.46 |
| FZ38J | £3,518.38 |
| FZ38K | £2,505.58 |
| FZ38L | £1,801.76 |
| FZ38M | £2,680.46 |
| FZ38N | £503.89   |
| FZ38P | £448.22   |
| FZ42A | £687.67   |
| FZ49D | £5,744.77 |
| FZ49E | £4,239.22 |
| FZ49G | £496.46   |
| FZ49H | £1,848.83 |
| FZ50Z | £769.19   |
| FZ51Z | £485.95   |

|    |       |            |
|----|-------|------------|
| 1  |       |            |
| 2  |       |            |
| 3  |       |            |
| 4  | FZ52Z | £554.48    |
| 5  | FZ53Z | £541.81    |
| 6  | FZ54Z | £411.68    |
| 7  | FZ55Z | £460.93    |
| 8  | FZ56Z | £482.70    |
| 9  | FZ57Z | £1,166.00  |
| 10 | FZ58A | £725.78    |
| 11 | FZ59Z | £345.86    |
| 12 | FZ60Z | £396.91    |
| 13 | FZ61Z | £429.29    |
| 14 | FZ62A | £1,688.57  |
| 15 | FZ63Z | £561.34    |
| 16 | FZ64A | £607.05    |
| 17 | FZ65Z | £654.68    |
| 18 | FZ66C | £13,932.55 |
| 19 | FZ66D | £8,189.81  |
| 20 | FZ66E | £3,134.54  |
| 21 | FZ66F | £5,589.72  |
| 22 | FZ67C | £10,188.49 |
| 23 | FZ67D | £6,012.88  |
| 24 | FZ67E | £4,500.28  |
| 25 | FZ67F | £3,790.60  |
| 26 | FZ69C | £19,184.77 |
| 27 | FZ70Z | £520.41    |
| 28 | FZ71D | £5,958.86  |
| 29 | FZ71F | £897.36    |
| 30 | FZ71G | £1,603.20  |
| 31 | FZ72Z | £2,031.30  |
| 32 | FZ73C | £16,930.33 |
| 33 | FZ73D | £13,373.95 |
| 34 | FZ73E | £13,300.39 |
| 35 | FZ73F | £8,743.87  |
| 36 | FZ74C | £12,875.23 |
| 37 | FZ74D | £9,334.53  |
| 38 | FZ74E | £7,989.55  |
| 39 | FZ74F | £6,883.99  |
| 40 | FZ75C | £8,436.91  |
| 41 | FZ75D | £6,312.07  |
| 42 | FZ75E | £5,575.42  |
| 43 | FZ76C | £6,792.07  |
| 44 | FZ76D | £5,430.19  |
| 45 | FZ77C | £5,412.39  |
| 46 | FZ77D | £4,025.68  |
| 47 | FZ77E | £3,485.39  |
| 48 | FZ78B | £5,587.18  |
| 49 |       |            |
| 50 |       |            |
| 51 |       |            |
| 52 |       |            |
| 53 |       |            |
| 54 |       |            |
| 55 |       |            |
| 56 |       |            |
| 57 |       |            |
| 58 |       |            |
| 59 |       |            |
| 60 |       |            |

|       |            |
|-------|------------|
| FZ79D | £9,964.10  |
| FZ79E | £6,512.34  |
| FZ80C | £18,886.63 |
| FZ80D | £12,819.12 |
| FZ80E | £9,764.70  |
| FZ81C | £11,172.73 |
| FZ81D | £8,308.93  |
| FZ81E | £5,911.18  |
| FZ83D | £4,751.89  |
| FZ83H | £2,682.26  |
| FZ83J | £4,204.90  |
| FZ83K | £3,297.37  |
| FZ84Z | £4,899.45  |
| FZ85Z | £3,810.34  |
| FZ87D | £6,128.11  |
| FZ87E | £4,664.11  |
| FZ87F | £3,847.01  |
| FZ87G | £1,569.17  |
| FZ88A | £700.60    |
| FZ89Z | £2,229.68  |
| FZ90A | £2,202.65  |
| FZ90B | £1,318.05  |
| FZ91A | £9,264.93  |
| FZ91B | £6,032.02  |
| FZ91C | £4,359.18  |
| FZ91D | £2,890.07  |
| FZ91E | £4,870.73  |
| FZ91F | £3,450.95  |
| FZ91G | £2,654.40  |
| FZ91H | £2,056.39  |
| FZ91J | £3,710.11  |
| FZ91K | £2,687.17  |
| FZ91L | £1,972.99  |
| FZ91M | £452.22    |
| FZ92A | £7,070.43  |
| FZ92B | £5,711.23  |
| FZ92C | £3,170.67  |
| FZ92D | £4,713.67  |
| FZ92E | £3,257.60  |
| FZ92F | £2,534.24  |
| FZ92G | £3,828.74  |
| FZ92H | £541.51    |
| FZ92J | £2,303.32  |
| FZ92K | £1,943.25  |
| GA01C | £20,422.28 |

|       |            |
|-------|------------|
| GA03C | £13,933.17 |
| GA03D | £10,037.67 |
| GA03E | £9,194.81  |
| GA04C | £16,609.58 |
| GA04D | £7,471.19  |
| GA05C | £9,309.58  |
| GA05D | £6,948.45  |
| GA06C | £7,033.98  |
| GA06D | £944.47    |
| GA07C | £6,248.27  |
| GA07D | £5,063.49  |
| GA07E | £3,758.99  |
| GA10G | £3,175.90  |
| GA10H | £3,934.88  |
| GA10J | £2,671.09  |
| GA10K | £2,382.68  |
| GA10L | £6,192.54  |
| GA10M | £4,218.23  |
| GA10N | £3,505.81  |
| GA12Z | £30,662.98 |
| GA13A | £3,888.00  |
| GA13B | £2,463.62  |
| GB01C | £9,378.31  |
| GB01D | £6,893.78  |
| GB01E | £1,850.13  |
| GB01F | £4,047.51  |
| GB02D | £7,208.79  |
| GB02E | £5,125.11  |
| GB02F | £1,023.66  |
| GB03C | £5,596.35  |
| GB03D | £859.66    |
| GB03E | £747.26    |
| GB03F | £667.40    |
| GB04D | £560.88    |
| GB05F | £6,752.54  |
| GB05G | £4,733.39  |
| GB05H | £1,695.15  |
| GB06E | £5,439.00  |
| GB06F | £725.33    |
| GB06G | £3,293.42  |
| GB06H | £745.86    |
| GB07Z | £707.32    |
| GB09E | £849.83    |
| GC01C | £5,495.74  |
| GC01D | £3,084.11  |



|       |            |
|-------|------------|
| GC01E | £580.59    |
| GC01F | £1,918.60  |
| GC12C | £5,930.69  |
| GC12D | £3,897.48  |
| GC12E | £2,851.69  |
| GC12F | £2,931.29  |
| GC12G | £3,100.63  |
| GC12H | £2,465.63  |
| GC12J | £1,990.09  |
| GC12K | £1,349.62  |
| GC17A | £7,854.48  |
| GC17B | £5,758.54  |
| GC17C | £4,004.99  |
| GC17D | £4,066.71  |
| GC17E | £3,565.00  |
| GC17F | £2,682.50  |
| GC17G | £3,152.24  |
| GC17H | £2,479.59  |
| GC17J | £1,931.82  |
| GC17K | £490.50    |
| HA11A | £12,489.07 |
| HA11B | £8,705.32  |
| HA11C | £7,543.60  |
| HA12B | £7,961.26  |
| HA12C | £2,365.05  |
| HA13A | £7,980.41  |
| HA13B | £6,388.99  |
| HA13C | £5,386.68  |
| HA14A | £7,615.80  |
| HA14B | £4,830.20  |
| HA14C | £3,698.78  |
| HA21B | £9,571.84  |
| HA21C | £5,722.80  |
| HA22B | £8,629.92  |
| HA22C | £4,906.88  |
| HA23B | £6,921.55  |
| HA23C | £1,683.05  |
| HA24Z | £6,023.58  |
| HA25B | £5,503.83  |
| HA25C | £1,701.15  |
| HA29Z | £903.09    |
| HA31B | £6,156.89  |
| HA31C | £4,013.69  |
| HA32Z | £5,807.90  |
| HA33Z | £4,246.83  |

|    |       |            |
|----|-------|------------|
| 1  |       |            |
| 2  |       |            |
| 3  | HA34Z | £4,051.73  |
| 4  | HA35Z | £1,252.41  |
| 5  | HA39Z | £613.35    |
| 6  | HA51Z | £1,688.69  |
| 7  | HA52Z | £1,774.44  |
| 8  | HA53Z | £1,989.39  |
| 9  | HA54Z | £1,452.04  |
| 10 | HA55Z | £1,546.57  |
| 11 | HA56A | £1,434.10  |
| 12 | HA56B | £2,107.93  |
| 13 | HA61B | £4,889.56  |
| 14 | HA61C | £4,082.81  |
| 15 | HA62Z | £1,927.10  |
| 16 | HA63Z | £1,115.96  |
| 17 | HA69Z | £601.95    |
| 18 | HA71B | £4,708.05  |
| 19 | HA71C | £2,871.56  |
| 20 | HA72Z | £2,527.75  |
| 21 | HA73B | £1,402.82  |
| 22 | HA73C | £948.45    |
| 23 | HA79Z | £1,012.81  |
| 24 | HA81A | £2,515.47  |
| 25 | HA81B | £488.63    |
| 26 | HA81C | £503.30    |
| 27 | HA83A | £1,705.28  |
| 28 | HA83B | £1,116.11  |
| 29 | HA83C | £1,058.05  |
| 30 | HA91Z | £3,861.39  |
| 31 | HA92Z | £3,426.20  |
| 32 | HA93Z | £1,495.98  |
| 33 | HA94Z | £592.67    |
| 34 | HA95Z | £921.30    |
| 35 | HA96Z | £652.79    |
| 36 | HA97Z | £1,971.17  |
| 37 | HA99Z | £4,308.02  |
| 38 | HB11A | £10,230.56 |
| 39 | HB11B | £6,493.36  |
| 40 | HB11C | £6,120.61  |
| 41 | HB12A | £8,217.36  |
| 42 | HB12B | £6,460.06  |
| 43 | HB12C | £5,880.11  |
| 44 | HB13Z | £4,333.10  |
| 45 | HB14B | £4,932.98  |
| 46 | HB14C | £1,262.27  |
| 47 | HB15D | £4,462.35  |
| 48 |       |            |
| 49 |       |            |
| 50 |       |            |
| 51 |       |            |
| 52 |       |            |
| 53 |       |            |
| 54 |       |            |
| 55 |       |            |
| 56 |       |            |
| 57 |       |            |
| 58 |       |            |
| 59 |       |            |
| 60 |       |            |

|    |       |           |
|----|-------|-----------|
| 1  |       |           |
| 2  |       |           |
| 3  |       |           |
| 4  | HB15E | £2,583.33 |
| 5  | HB15G | £2,606.19 |
| 6  | HB16B | £6,806.20 |
| 7  | HB16C | £954.36   |
| 8  | HB19Z | £729.06   |
| 9  | HB21A | £7,765.27 |
| 10 | HB21B | £6,165.26 |
| 11 | HB21C | £5,674.99 |
| 12 | HB22B | £1,477.67 |
| 13 | HB22C | £2,931.03 |
| 14 | HB23B | £3,140.86 |
| 15 | HB23C | £2,470.49 |
| 16 | HB24B | £3,892.33 |
| 17 | HB24C | £2,321.65 |
| 18 | HB25D | £5,498.79 |
| 19 | HB25E | £1,334.71 |
| 20 | HB25F | £1,325.73 |
| 21 | HB29Z | £572.44   |
| 22 | HB31Z | £4,248.35 |
| 23 | HB32A | £3,246.74 |
| 24 | HB32B | £3,917.43 |
| 25 | HB33D | £6,825.00 |
| 26 | HB33E | £1,525.68 |
| 27 | HB33G | £1,535.18 |
| 28 | HB34D | £5,381.61 |
| 29 | HB34E | £1,301.25 |
| 30 | HB35B | £4,704.63 |
| 31 | HB35C | £1,238.17 |
| 32 | HB39Z | £744.65   |
| 33 | HB51Z | £2,799.54 |
| 34 | HB52B | £3,442.59 |
| 35 | HB52C | £2,892.94 |
| 36 | HB53Z | £2,521.75 |
| 37 | HB54B | £1,345.17 |
| 38 | HB54C | £1,383.40 |
| 39 | HB55B | £979.82   |
| 40 | HB55C | £1,028.29 |
| 41 | HB56B | £4,042.02 |
| 42 | HB56C | £1,190.46 |
| 43 | HB59Z | £628.28   |
| 44 | HB61B | £3,730.08 |
| 45 | HB61C | £3,024.80 |
| 46 | HB62B | £2,402.86 |
| 47 | HB62C | £2,217.49 |
| 48 | HB63Z | £2,279.40 |
| 49 |       |           |
| 50 |       |           |
| 51 |       |           |
| 52 |       |           |
| 53 |       |           |
| 54 |       |           |
| 55 |       |           |
| 56 |       |           |
| 57 |       |           |
| 58 |       |           |
| 59 |       |           |
| 60 |       |           |

|    |       |            |
|----|-------|------------|
| 1  |       |            |
| 2  |       |            |
| 3  |       |            |
| 4  | HB69Z | £513.97    |
| 5  | HB71B | £1,683.20  |
| 6  | HB71C | £4,076.43  |
| 7  | HB72Z | £1,496.34  |
| 8  | HB73Z | £2,235.11  |
| 9  | HB79Z | £599.59    |
| 10 | HB91Z | £3,177.84  |
| 11 | HB99Z | £959.72    |
| 12 | HC01A | £14,243.80 |
| 13 | HC01B | £7,662.28  |
| 14 | HC01C | £6,586.51  |
| 15 | HC02D | £14,329.41 |
| 16 | HC02E | £6,437.15  |
| 17 | HC02F | £5,341.63  |
| 18 | HC03D | £4,039.63  |
| 19 | HC03E | £5,624.29  |
| 20 | HC03F | £4,332.23  |
| 21 | HC04D | £7,075.95  |
| 22 | HC04E | £4,405.29  |
| 23 | HC04F | £3,656.35  |
| 24 | HC05D | £9,266.83  |
| 25 | HC05E | £6,461.23  |
| 26 | HC05F | £841.48    |
| 27 | HC06Z | £1,596.98  |
| 28 | HC07A | £10,977.94 |
| 29 | HC07B | £6,973.66  |
| 30 | HC10Z | £402.17    |
| 31 | HC11Z | £863.62    |
| 32 | HC12Z | £636.73    |
| 33 | HC20D | £5,496.59  |
| 34 | HC20E | £3,836.73  |
| 35 | HC20F | £2,994.39  |
| 36 | HC20G | £2,361.26  |
| 37 | HC21D | £15,961.04 |
| 38 | HC21E | £4,759.89  |
| 39 | HC26D | £760.81    |
| 40 | HC26E | £695.56    |
| 41 | HC26F | £683.46    |
| 42 | HC27D | £4,996.22  |
| 43 | HC27E | £3,245.03  |
| 44 | HC27F | £2,369.57  |
| 45 | HC27G | £505.17    |
| 46 | HC28D | £10,324.42 |
| 47 | HC28E | £7,109.83  |
| 48 | HC28F | £4,011.42  |
| 49 |       |            |
| 50 |       |            |
| 51 |       |            |
| 52 |       |            |
| 53 |       |            |
| 54 |       |            |
| 55 |       |            |
| 56 |       |            |
| 57 |       |            |
| 58 |       |            |
| 59 |       |            |
| 60 |       |            |

|    |       |            |
|----|-------|------------|
| 1  |       |            |
| 2  |       |            |
| 3  |       |            |
| 4  | HC28G | £3,421.42  |
| 5  | HC29A | £441.63    |
| 6  | HC29B | £420.45    |
| 7  | HC30D | £5,990.65  |
| 8  | HC30E | £3,016.77  |
| 9  | HC31D | £7,351.68  |
| 10 | HC31E | £4,906.91  |
| 11 | HC31F | £4,743.18  |
| 12 | HC31G | £646.72    |
| 13 | HC32D | £533.04    |
| 14 | HC32E | £478.69    |
| 15 | HC32F | £462.15    |
| 16 | HC40A | £21,410.92 |
| 17 | HC40B | £15,985.84 |
| 18 | HC41A | £8,891.94  |
| 19 | HC41B | £7,031.53  |
| 20 | HC42Z | £10,543.24 |
| 21 | HC43Z | £9,261.06  |
| 22 | HD21D | £3,417.26  |
| 23 | HD21E | £2,589.77  |
| 24 | HD21F | £1,862.62  |
| 25 | HD21G | £406.97    |
| 26 | HD21H | £1,522.69  |
| 27 | HD23D | £6,584.68  |
| 28 | HD23E | £544.27    |
| 29 | HD23F | £413.08    |
| 30 | HD23G | £431.89    |
| 31 | HD23H | £424.66    |
| 32 | HD23J | £432.54    |
| 33 | HD24D | £4,665.17  |
| 34 | HD24E | £3,569.75  |
| 35 | HD24F | £2,453.16  |
| 36 | HD24G | £2,226.71  |
| 37 | HD24H | £403.46    |
| 38 | HD25D | £643.63    |
| 39 | HD25E | £707.35    |
| 40 | HD25F | £3,725.69  |
| 41 | HD25G | £3,231.34  |
| 42 | HD25H | £2,710.61  |
| 43 | HD26D | £521.16    |
| 44 | HD26E | £2,403.23  |
| 45 | HD26F | £458.48    |
| 46 | HD26G | £430.37    |
| 47 | HD39E | £4,225.92  |
| 48 | HD39F | £3,041.80  |
| 49 |       |            |
| 50 |       |            |
| 51 |       |            |
| 52 |       |            |
| 53 |       |            |
| 54 |       |            |
| 55 |       |            |
| 56 |       |            |
| 57 |       |            |
| 58 |       |            |
| 59 |       |            |
| 60 |       |            |

|    |       |            |
|----|-------|------------|
| 1  |       |            |
| 2  |       |            |
| 3  | HD39G | £2,492.79  |
| 4  | HD39H | £1,921.15  |
| 5  | HD40D | £8,531.13  |
| 6  | HD40E | £4,343.94  |
| 7  | HD40F | £3,539.32  |
| 8  | HD40G | £2,744.69  |
| 9  | HD40H | £377.65    |
| 10 | HR07A | £5,970.80  |
| 11 | HR07B | £7,470.47  |
| 12 | HR07C | £8,876.42  |
| 13 | HR08A | £5,420.64  |
| 14 | HR08B | £6,744.73  |
| 15 | HR08C | £10,303.59 |
| 16 | HR09A | £5,588.98  |
| 17 | HR09B | £7,825.23  |
| 18 | HR09C | £15,557.92 |
| 19 | JA12D | £5,353.82  |
| 20 | JA12E | £3,576.57  |
| 21 | JA12F | £2,672.39  |
| 22 | JA12G | £4,076.51  |
| 23 | JA12H | £2,304.75  |
| 24 | JA12J | £1,283.25  |
| 25 | JA12K | £497.76    |
| 26 | JA12L | £1,294.77  |
| 27 | JA13A | £2,487.08  |
| 28 | JA13B | £1,797.83  |
| 29 | JA13C | £407.72    |
| 30 | JA14Z | £8,984.75  |
| 31 | JA18Z | £654.24    |
| 32 | JA19Z | £609.14    |
| 33 | JA20D | £3,599.49  |
| 34 | JA20E | £3,125.52  |
| 35 | JA20F | £2,900.49  |
| 36 | JA21A | £3,884.88  |
| 37 | JA21B | £3,423.41  |
| 38 | JA24D | £1,365.46  |
| 39 | JA24E | £2,480.14  |
| 40 | JA24F | £1,288.46  |
| 41 | JA25Z | £2,262.30  |
| 42 | JA26A | £4,397.62  |
| 43 | JA26B | £3,674.96  |
| 44 | JA26C | £3,476.29  |
| 45 | JA27Z | £6,748.28  |
| 46 | JA28Z | £11,072.09 |
| 47 | JA30Z | £5,488.31  |
| 48 |       |            |
| 49 |       |            |
| 50 |       |            |
| 51 |       |            |
| 52 |       |            |
| 53 |       |            |
| 54 |       |            |
| 55 |       |            |
| 56 |       |            |
| 57 |       |            |
| 58 |       |            |
| 59 |       |            |
| 60 |       |            |

|    |       |            |
|----|-------|------------|
| 1  |       |            |
| 2  |       |            |
| 3  |       |            |
| 4  | JB30C | £818.93    |
| 5  | JB31A | £34,548.56 |
| 6  | JB32A | £4,925.04  |
| 7  | JB32B | £4,242.81  |
| 8  | JB32C | £2,638.62  |
| 9  |       |            |
| 10 | JB33A | £10,761.97 |
| 11 | JB33B | £3,111.75  |
| 12 | JB33C | £493.06    |
| 13 | JC40Z | £10,970.68 |
| 14 | JC41Z | £5,326.68  |
| 15 | JC42A | £1,029.92  |
| 16 | JC42B | £986.16    |
| 17 | JC43A | £623.84    |
| 18 | JC43B | £859.15    |
| 19 | JC47A | £48.38     |
| 20 | JD07A | £7,618.31  |
| 21 | JD07B | £5,453.27  |
| 22 | JD07C | £3,609.36  |
| 23 | JD07D | £2,491.79  |
| 24 | JD07E | £506.50    |
| 25 | JD07F | £593.60    |
| 26 | JD07G | £3,064.28  |
| 27 | JD07H | £2,335.07  |
| 28 | JD07J | £1,789.28  |
| 29 | JD07K | £1,371.42  |
| 30 | KA03C | £2,902.57  |
| 31 | KA03D | £2,522.20  |
| 32 | KA04B | £5,111.70  |
| 33 | KA05C | £576.73    |
| 34 | KA05D | £515.58    |
| 35 | KA06C | £4,158.03  |
| 36 | KA06D | £1,938.75  |
| 37 | KA06E | £1,664.03  |
| 38 | KA07A | £3,096.36  |
| 39 | KA07B | £1,826.34  |
| 40 | KA07C | £1,408.13  |
| 41 | KA08A | £748.87    |
| 42 | KA08B | £487.48    |
| 43 | KA08C | £425.15    |
| 44 | KA09C | £5,743.92  |
| 45 | KA09D | £4,006.02  |
| 46 | KA09E | £3,230.69  |
| 47 | KB01C | £485.26    |
| 48 | KB01D | £426.23    |
| 49 | KB01E | £554.32    |
| 50 |       |            |
| 51 |       |            |
| 52 |       |            |
| 53 |       |            |
| 54 |       |            |
| 55 |       |            |
| 56 |       |            |
| 57 |       |            |
| 58 |       |            |
| 59 |       |            |
| 60 |       |            |

|    |       |            |
|----|-------|------------|
| 1  |       |            |
| 2  |       |            |
| 3  |       |            |
| 4  | KB01F | £391.14    |
| 5  | KB02G | £2,822.99  |
| 6  | KB02H | £463.36    |
| 7  | KB02J | £448.44    |
| 8  | KB02K | £415.98    |
| 9  |       |            |
| 10 | KB03C | £3,870.81  |
| 11 | KB03D | £2,549.46  |
| 12 | KB03E | £2,138.25  |
| 13 | KB04Z | £1,958.24  |
| 14 | KC04A | £507.03    |
| 15 | KC04B | £267.75    |
| 16 |       |            |
| 17 | KC05G | £4,544.43  |
| 18 | KC05H | £4,024.18  |
| 19 | KC05J | £3,070.54  |
| 20 | KC05K | £2,244.14  |
| 21 | KC05L | £462.93    |
| 22 | KC05M | £1,062.38  |
| 23 | KC05N | £1,305.90  |
| 24 | LA02A | £20,798.61 |
| 25 | LA03A | £18,205.21 |
| 26 | LA04J | £6,115.86  |
| 27 | LA04K | £4,428.48  |
| 28 | LA04L | £3,268.28  |
| 29 | LA04M | £2,125.60  |
| 30 | LA04N | £4,874.17  |
| 31 | LA04P | £3,495.46  |
| 32 | LA04Q | £2,451.10  |
| 33 | LA04R | £476.80    |
| 34 | LA04S | £447.02    |
| 35 | LA05Z | £785.01    |
| 36 | LA07H | £5,969.44  |
| 37 | LA07J | £4,527.07  |
| 38 | LA07K | £3,248.23  |
| 39 | LA07L | £3,936.57  |
| 40 | LA07M | £548.46    |
| 41 | LA07N | £2,227.42  |
| 42 | LA07P | £490.22    |
| 43 | LA08H | £3,805.42  |
| 44 | LA08J | £2,949.90  |
| 45 | LA08K | £3,920.89  |
| 46 | LA08L | £3,231.83  |
| 47 | LA08M | £342.15    |
| 48 | LA08N | £300.99    |
| 49 | LA08P | £2,137.26  |
| 50 | LA09K | £3,184.56  |
| 51 |       |            |
| 52 |       |            |
| 53 |       |            |
| 54 |       |            |
| 55 |       |            |
| 56 |       |            |
| 57 |       |            |
| 58 |       |            |
| 59 |       |            |
| 60 |       |            |



|    |       |           |
|----|-------|-----------|
| 1  |       |           |
| 2  |       |           |
| 3  |       |           |
| 4  | LA09L | £2,469.46 |
| 5  | LA09N | £2,843.00 |
| 6  | LA09P | £1,797.58 |
| 7  | LA09Q | £1,366.99 |
| 8  |       |           |
| 9  | LA97A | £0.00     |
| 10 | LB05E | £3,817.98 |
| 11 | LB05F | £3,399.78 |
| 12 |       |           |
| 13 | LB05G | £2,487.93 |
| 14 | LB06J | £4,239.80 |
| 15 | LB06K | £3,367.81 |
| 16 |       |           |
| 17 | LB06L | £2,273.24 |
| 18 | LB06M | £2,164.00 |
| 19 | LB06N | £4,934.12 |
| 20 | LB06P | £3,725.97 |
| 21 |       |           |
| 22 | LB06Q | £2,341.83 |
| 23 | LB06R | £445.60   |
| 24 |       |           |
| 25 | LB06S | £1,243.65 |
| 26 |       |           |
| 27 | LB09D | £713.76   |
| 28 | LB10C | £6,918.01 |
| 29 | LB10D | £5,302.30 |
| 30 | LB12Z | £3,377.65 |
| 31 | LB13C | £4,286.46 |
| 32 | LB13D | £2,654.36 |
| 33 | LB13E | £1,062.30 |
| 34 | LB13F | £1,815.17 |
| 35 |       |           |
| 36 | LB14Z | £769.18   |
| 37 |       |           |
| 38 | LB15E | £487.60   |
| 39 | LB16D | £2,930.21 |
| 40 | LB16E | £2,186.91 |
| 41 | LB16F | £2,130.46 |
| 42 | LB16G | £2,546.28 |
| 43 | LB16H | £1,804.13 |
| 44 | LB16J | £1,514.76 |
| 45 | LB16K | £396.56   |
| 46 | LB17Z | £288.52   |
| 47 | LB18Z | £385.29   |
| 48 |       |           |
| 49 | LB19C | £3,153.41 |
| 50 | LB19D | £2,028.35 |
| 51 | LB19E | £2,645.85 |
| 52 | LB19F | £347.75   |
| 53 | LB19G | £796.40   |
| 54 | LB20C | £2,565.35 |
| 55 | LB20D | £1,601.59 |
| 56 | LB20E | £2,201.68 |
| 57 | LB20F | £450.12   |
| 58 |       |           |
| 59 |       |           |
| 60 |       |           |

|    |       |            |
|----|-------|------------|
| 1  |       |            |
| 2  |       |            |
| 3  | LB20G | £1,127.74  |
| 4  | LB21A | £5,469.42  |
| 5  | LB21B | £5,236.04  |
| 6  | LB22Z | £5,594.58  |
| 7  | LB25D | £3,676.54  |
| 8  | LB25E | £2,644.44  |
| 9  | LB25F | £2,393.78  |
| 10 | LB26A | £1,958.34  |
| 11 | LB26B | £1,670.04  |
| 12 | LB27Z | £586.81    |
| 13 | LB28C | £2,160.84  |
| 14 | LB28D | £1,401.77  |
| 15 | LB28E | £2,657.64  |
| 16 | LB28F | £458.42    |
| 17 | LB28G | £1,305.66  |
| 18 | LB29A | £3,861.40  |
| 19 | LB33Z | £773.42    |
| 20 | LB35C | £3,050.63  |
| 21 | LB35D | £2,607.77  |
| 22 | LB35E | £564.74    |
| 23 | LB35F | £1,686.33  |
| 24 | LB35G | £1,455.92  |
| 25 | LB35H | £1,279.58  |
| 26 | LB36Z | £506.12    |
| 27 | LB37C | £2,070.92  |
| 28 | LB37D | £422.65    |
| 29 | LB37E | £385.23    |
| 30 | LB38D | £2,104.76  |
| 31 | LB38E | £1,609.14  |
| 32 | LB38F | £472.22    |
| 33 | LB38G | £1,665.80  |
| 34 | LB38H | £324.41    |
| 35 | LB39C | £10,837.55 |
| 36 | LB39D | £9,429.91  |
| 37 | LB40C | £2,743.54  |
| 38 | LB40D | £1,964.20  |
| 39 | LB40F | £1,450.39  |
| 40 | LB40G | £465.77    |
| 41 | LB42A | £428.18    |
| 42 | LB43Z | £359.26    |
| 43 | LB46Z | £6,952.52  |
| 44 | LB47Z | £5,059.08  |
| 45 | LB48Z | £2,479.57  |
| 46 | LB49Z | £2,454.11  |
| 47 | LB50Z | £4,903.03  |
| 48 |       |            |
| 49 |       |            |
| 50 |       |            |
| 51 |       |            |
| 52 |       |            |
| 53 |       |            |
| 54 |       |            |
| 55 |       |            |
| 56 |       |            |
| 57 |       |            |
| 58 |       |            |
| 59 |       |            |
| 60 |       |            |

|    |       |            |
|----|-------|------------|
| 1  |       |            |
| 2  |       |            |
| 3  |       |            |
| 4  | LB51A | £1,897.63  |
| 5  | LB51B | £1,534.97  |
| 6  | LB52A | £6,607.34  |
| 7  | LB52B | £2,242.84  |
| 8  |       |            |
| 9  | LB53C | £1,467.66  |
| 10 | LB53D | £1,763.33  |
| 11 | LB54A | £1,116.61  |
| 12 |       |            |
| 13 | LB54C | £1,468.27  |
| 14 | LB55A | £683.35    |
| 15 | LB55B | £943.14    |
| 16 |       |            |
| 17 | LB56A | £1,026.29  |
| 18 | LB56C | £1,543.16  |
| 19 | LB57C | £2,176.85  |
| 20 |       |            |
| 21 | LB57D | £476.21    |
| 22 | LB58C | £2,190.53  |
| 23 |       |            |
| 24 | LB58D | £413.21    |
| 25 | LB59Z | £3,684.69  |
| 26 | LB60C | £9,573.79  |
| 27 | LB60E | £6,065.43  |
| 28 |       |            |
| 29 | LB60F | £5,210.39  |
| 30 | LB61C | £8,463.93  |
| 31 | LB61D | £6,064.71  |
| 32 | LB61E | £4,998.45  |
| 33 | LB61F | £4,914.89  |
| 34 |       |            |
| 35 | LB61G | £4,796.58  |
| 36 | LB62C | £6,486.22  |
| 37 |       |            |
| 38 | LB62D | £5,326.93  |
| 39 | LB64C | £6,098.13  |
| 40 |       |            |
| 41 | LB64D | £2,996.65  |
| 42 | LB64E | £2,489.19  |
| 43 | LB65C | £3,374.79  |
| 44 | LB65D | £2,531.37  |
| 45 | LB65E | £1,425.40  |
| 46 |       |            |
| 47 | LB67C | £13,522.65 |
| 48 |       |            |
| 49 | LB67D | £8,966.55  |
| 50 | LB68A | £4,166.50  |
| 51 | LB68B | £2,623.50  |
| 52 |       |            |
| 53 | LB69Z | £7,763.84  |
| 54 | LB70C | £3,045.32  |
| 55 | LB70D | £2,615.13  |
| 56 |       |            |
| 57 | LB72A | £409.36    |
| 58 | LB72B | £801.53    |
| 59 | LB74Z | £3,982.15  |
| 60 | MA01Z | £5,467.73  |
|    | MA02B | £4,209.72  |

|    |       |           |
|----|-------|-----------|
| 1  |       |           |
| 2  |       |           |
| 3  |       |           |
| 4  | MA02C | £3,676.11 |
| 5  | MA03C | £3,107.58 |
| 6  | MA03D | £2,532.15 |
| 7  | MA04C | £2,501.14 |
| 8  | MA04D | £2,087.46 |
| 9  | MA06A | £4,871.05 |
| 10 | MA06B | £3,783.22 |
| 11 | MA06C | £3,362.98 |
| 12 | MA07E | £5,336.99 |
| 13 | MA07F | £3,944.64 |
| 14 | MA07G | £3,255.48 |
| 15 | MA08A | £3,209.11 |
| 16 | MA08B | £2,888.08 |
| 17 | MA09Z | £1,542.47 |
| 18 | MA10Z | £1,180.92 |
| 19 | MA11Z | £2,840.05 |
| 20 | MA12Z | £1,112.56 |
| 21 | MA17C | £1,150.77 |
| 22 | MA17D | £1,449.77 |
| 23 | MA18C | £729.37   |
| 24 | MA18D | £991.08   |
| 25 | MA19A | £724.06   |
| 26 | MA19B | £735.02   |
| 27 | MA20Z | £1,227.49 |
| 28 | MA22Z | £1,375.81 |
| 29 | MA23Z | £910.72   |
| 30 | MA24Z | £1,009.95 |
| 31 | MA25Z | £817.73   |
| 32 | MA26A | £6,851.03 |
| 33 | MA26B | £5,026.02 |
| 34 | MA26C | £4,594.76 |
| 35 | MA27Z | £1,030.43 |
| 36 | MA28Z | £3,668.44 |
| 37 | MA29Z | £1,544.79 |
| 38 | MA30Z | £1,350.66 |
| 39 | MA31Z | £775.03   |
| 40 | MA32Z | £846.25   |
| 41 | MA33Z | £885.70   |
| 42 | MA34Z | £1,166.77 |
| 43 | MA35Z | £631.48   |
| 44 | MA36Z | £433.61   |
| 45 | MA38Z | £503.08   |
| 46 | MA39Z | £395.81   |
| 47 | MA40Z | £699.03   |
| 48 | MB05C | £6,662.48 |
| 49 |       |           |
| 50 |       |           |
| 51 |       |           |
| 52 |       |           |
| 53 |       |           |
| 54 |       |           |
| 55 |       |           |
| 56 |       |           |
| 57 |       |           |
| 58 |       |           |
| 59 |       |           |
| 60 |       |           |

|    |       |           |
|----|-------|-----------|
| 1  |       |           |
| 2  |       |           |
| 3  |       |           |
| 4  | MB05D | £5,287.21 |
| 5  | MB05E | £3,537.51 |
| 6  | MB05F | £2,303.05 |
| 7  | MB05G |           |
| 8  | MB05H | £5,387.16 |
| 9  | MB05J | £3,710.38 |
| 10 | MB05K | £3,141.07 |
| 11 | MB05L | £1,569.16 |
| 12 | MB05L | £1,557.71 |
| 13 | MB08A | £1,732.75 |
| 14 | MB08B | £466.09   |
| 15 | MB09B | £2,566.40 |
| 16 | MB09C | £2,428.72 |
| 17 | MB09D | £2,206.44 |
| 18 | MB09E | £542.97   |
| 19 | MB09F | £514.50   |
| 20 | MC09Z | £502.28   |
| 21 | MC11Z | £903.32   |
| 22 | MC12Z | £1,079.44 |
| 23 | NZ10Z | £741.28   |
| 24 | NZ16Z | £514.84   |
| 25 | NZ17A | £1,742.01 |
| 26 | NZ17B | £0.00     |
| 27 | NZ18A | £2,327.73 |
| 28 | NZ18B | £643.79   |
| 29 | NZ19A | £632.65   |
| 30 | NZ19B | £520.77   |
| 31 | NZ20A | £569.62   |
| 32 | NZ20B | £513.72   |
| 33 | NZ21Z | £0.00     |
| 34 | NZ22Z | £231.50   |
| 35 | NZ23Z | £649.69   |
| 36 | NZ24B | £2,146.26 |
| 37 | NZ25Z | £1,766.53 |
| 38 | NZ26A | £670.03   |
| 39 | NZ26B | £2,065.46 |
| 40 | NZ27Z | £2,284.30 |
| 41 | NZ30A | £2,262.55 |
| 42 | NZ30B | £1,147.73 |
| 43 | NZ30C | £1,092.15 |
| 44 | NZ31A | £2,685.65 |
| 45 | NZ31B | £2,425.97 |
| 46 | NZ31C | £2,208.06 |
| 47 | NZ32A | £3,075.14 |
| 48 | NZ32B | £2,640.80 |
| 49 | NZ32C | £0.00     |
| 50 |       |           |
| 51 |       |           |
| 52 |       |           |
| 53 |       |           |
| 54 |       |           |
| 55 |       |           |
| 56 |       |           |
| 57 |       |           |
| 58 |       |           |
| 59 |       |           |
| 60 |       |           |

|       |           |
|-------|-----------|
| NZ33A | £2,983.78 |
| NZ33B | £2,735.70 |
| NZ33C | £2,512.40 |
| NZ34B | £2,881.51 |
| NZ34C | £2,825.40 |
| NZ40A | £1,360.86 |
| NZ40B | £2,488.36 |
| NZ40C | £2,253.11 |
| NZ41A | £3,165.62 |
| NZ41B | £1,538.37 |
| NZ41C | £2,532.36 |
| NZ42A | £3,536.05 |
| NZ42B | £3,001.46 |
| NZ42C | £2,719.67 |
| NZ43B | £3,130.63 |
| NZ43C | £2,929.01 |
| NZ44A | £3,855.94 |
| NZ44B | £1,883.85 |
| NZ44C | £3,175.10 |
| NZ50A | £4,044.71 |
| NZ50B | £3,127.84 |
| NZ50C | £1,939.33 |
| NZ51A | £5,164.17 |
| NZ51B | £4,126.61 |
| NZ51C | £3,441.76 |
| PA01A | £3,913.13 |
| PA01B | £830.64   |
| PA02A | £608.50   |
| PA03B | £514.21   |
| PA04A | £572.08   |
| PA04B | £490.55   |
| PA07B | £1,523.56 |
| PA08A | £2,350.40 |
| PA08B | £692.65   |
| PA11Z | £467.62   |
| PA12Z | £1,410.11 |
| PA14C | £3,250.84 |
| PA14D | £679.77   |
| PA14E | £490.45   |
| PA16B | £1,803.64 |
| PA17B | £1,724.24 |
| PA19A | £535.54   |
| PA21B | £1,381.30 |
| PA22Z | £1,479.29 |
| PA23A | £3,399.55 |

|    |       |            |
|----|-------|------------|
| 1  |       |            |
| 2  |       |            |
| 3  |       |            |
| 4  | PA23B | £2,303.84  |
| 5  | PA24Z | £1,899.46  |
| 6  | PA25A | £4,433.02  |
| 7  | PA26A | £3,008.65  |
| 8  | PA26B | £1,542.16  |
| 9  | PA27Z | £2,968.28  |
| 10 | PA28A | £2,693.99  |
| 11 | PA28B | £488.44    |
| 12 | PA29Z | £505.45    |
| 13 | PA30B | £651.62    |
| 14 | PA31Z | £4,543.05  |
| 15 | PA32B | £576.32    |
| 16 | PA34A | £2,680.24  |
| 17 | PA34B | £532.44    |
| 18 | PA35B | £1,857.51  |
| 19 | PA36Z | £2,269.61  |
| 20 | PA48B | £2,176.65  |
| 21 | PA50Z | £480.04    |
| 22 | PA52C | £12,554.75 |
| 23 | PA56B | £1,487.55  |
| 24 | PA57Z | £1,818.39  |
| 25 | PA58Z | £511.94    |
| 26 | PA59E | £3,319.78  |
| 27 | PA59F | £1,797.45  |
| 28 | PA62Z | £457.81    |
| 29 | PA63B | £636.20    |
| 30 | PA63C | £1,469.76  |
| 31 | PA65A | £458.62    |
| 32 | PA67Z | £1,642.07  |
| 33 | PA68Z | £2,000.68  |
| 34 | PA69Z | £1,873.06  |
| 35 | PA70Z | £477.02    |
| 36 | QZ01C | £13,766.98 |
| 37 | QZ01D | £11,208.28 |
| 38 | QZ01E | £8,378.49  |
| 39 | QZ01F | £7,077.00  |
| 40 | QZ02C | £13,767.89 |
| 41 | QZ02D | £9,768.56  |
| 42 | QZ02E | £6,446.11  |
| 43 | QZ02F | £5,459.81  |
| 44 | QZ03B | £10,563.15 |
| 45 | QZ05C | £1,898.17  |
| 46 | QZ05D | £1,009.31  |
| 47 | QZ05E | £1,008.63  |
| 48 | QZ05F | £1,047.03  |
| 49 |       |            |
| 50 |       |            |
| 51 |       |            |
| 52 |       |            |
| 53 |       |            |
| 54 |       |            |
| 55 |       |            |
| 56 |       |            |
| 57 |       |            |
| 58 |       |            |
| 59 |       |            |
| 60 |       |            |

|    |       |            |
|----|-------|------------|
| 1  |       |            |
| 2  |       |            |
| 3  |       |            |
| 4  | QZ11C | £15,879.14 |
| 5  | QZ11D | £12,287.67 |
| 6  | QZ11E | £10,158.69 |
| 7  | QZ11F | £8,750.96  |
| 8  | QZ12A | £9,783.80  |
| 9  | QZ12B | £6,657.74  |
| 10 | QZ12C | £5,260.20  |
| 11 | QZ12D | £4,373.55  |
| 12 | QZ12E | £1,098.05  |
| 13 | QZ13Z | £1,805.34  |
| 14 | QZ14Z | £474.97    |
| 15 | QZ15D | £8,857.14  |
| 16 | QZ15E | £9,724.57  |
| 17 | QZ15F | £4,155.53  |
| 18 | QZ15G | £2,494.01  |
| 19 | QZ15H | £3,368.50  |
| 20 | QZ15J | £2,291.41  |
| 21 | QZ16D | £1,312.97  |
| 22 | QZ16E | £864.87    |
| 23 | QZ16F | £3,951.22  |
| 24 | QZ16G | £3,331.18  |
| 25 | QZ16H | £3,224.26  |
| 26 | QZ17D | £5,790.42  |
| 27 | QZ17E | £4,782.02  |
| 28 | QZ17F | £693.37    |
| 29 | QZ17G | £671.77    |
| 30 | QZ17H | £2,194.59  |
| 31 | QZ17J | £512.96    |
| 32 | QZ19Z | £1,832.80  |
| 33 | QZ20B | £494.16    |
| 34 | QZ20C | £2,516.87  |
| 35 | QZ20D | £1,587.00  |
| 36 | QZ20E | £1,201.02  |
| 37 | QZ21A | £1,534.74  |
| 38 | QZ21B | £1,528.98  |
| 39 | QZ22A | £1,230.38  |
| 40 | QZ22B | £1,074.02  |
| 41 | QZ24A | £5,212.58  |
| 42 | QZ24B | £4,172.97  |
| 43 | QZ24C | £3,943.14  |
| 44 | QZ25A | £5,607.22  |
| 45 | QZ25B | £3,814.50  |
| 46 | RC02Z | £1,807.21  |
| 47 | RC12A | £8,332.30  |
| 48 | RC12C | £10,406.44 |
| 49 |       |            |
| 50 |       |            |
| 51 |       |            |
| 52 |       |            |
| 53 |       |            |
| 54 |       |            |
| 55 |       |            |
| 56 |       |            |
| 57 |       |            |
| 58 |       |            |
| 59 |       |            |
| 60 |       |            |



|       |            |
|-------|------------|
| RC12D | £10,515.15 |
| RC12E | £12,466.92 |
| RC13C | £18,285.51 |
| RC14Z | £2,650.85  |
| RC15Z | £3,250.40  |
| RC16Z | £5,947.00  |
| RC31Z | £3,080.66  |
| RC32Z | £3,359.62  |
| RC33Z | £4,940.19  |
| RC41Z | £1,957.52  |
| RC51Z | £8,339.11  |
| SA01G | £3,209.85  |
| SA01H | £621.99    |
| SA02G | £3,698.15  |
| SA02H | £817.28    |
| SA02J | £3,068.06  |
| SA03G | £2,722.24  |
| SA04G | £426.96    |
| SA04H | £584.04    |
| SA04J | £526.03    |
| SA04K | £308.79    |
| SA04L | £360.21    |
| SA05H | £1,751.69  |
| SA05J | £364.28    |
| SA06G | £932.47    |
| SA06H | £323.49    |
| SA06J | £636.20    |
| SA06K | £914.14    |
| SA07G | £285.16    |
| SA07H | £3,223.75  |
| SA07J | £314.78    |
| SA08G | £554.24    |
| SA08H | £2,050.03  |
| SA08J | £502.54    |
| SA09G | £3,267.18  |
| SA09H | £2,310.08  |
| SA09J | £556.94    |
| SA09K | £1,493.30  |
| SA09L | £1,293.93  |
| SA12G | £3,574.36  |
| SA12H | £2,586.97  |
| SA12J | £372.45    |
| SA12K | £707.78    |
| SA13A | £482.51    |
| SA13B | £705.55    |

|    |       |            |
|----|-------|------------|
| 1  |       |            |
| 2  |       |            |
| 3  | SA14Z | £9,908.42  |
| 4  |       |            |
| 5  | SA17G | £4,081.88  |
| 6  | SA17H | £288.20    |
| 7  | SA18Z | £727.73    |
| 8  |       |            |
| 9  | SA19A | £9,817.12  |
| 10 | SA21A | £68,952.39 |
| 11 | SA24J | £4,535.27  |
| 12 |       |            |
| 13 | SA25G | £12,199.39 |
| 14 | SA25H | £512.39    |
| 15 | SA25J | £11,638.22 |
| 16 | SA25K | £8,970.10  |
| 17 | SA25L | £5,147.49  |
| 18 | SA25M | £391.34    |
| 19 | SA26A | £16,115.69 |
| 20 |       |            |
| 21 | SA30A | £8,376.93  |
| 22 | SA30B | £4,480.35  |
| 23 | SA30C | £3,983.43  |
| 24 | SA30D | £3,241.63  |
| 25 | SA30E | £362.36    |
| 26 |       |            |
| 27 | SA31A | £10,209.91 |
| 28 | SA31B | £6,511.20  |
| 29 | SA31C | £4,395.19  |
| 30 | SA31D | £411.14    |
| 31 | SA31E | £3,279.83  |
| 32 | SA31F | £389.52    |
| 33 | SA32C | £337.90    |
| 34 | SA32D | £384.63    |
| 35 | SA33Z | £530.82    |
| 36 | SA34Z | £3,816.68  |
| 37 | SA35B | £3,345.86  |
| 38 | SA35C | £2,548.07  |
| 39 | SA35D | £549.89    |
| 40 | SA35E | £1,775.76  |
| 41 | SA36A | £3,799.11  |
| 42 | SA36B | £2,409.34  |
| 43 | SA36C | £468.24    |
| 44 | SA37Z | £390.80    |
| 45 | SB97Z | £0.00      |
| 46 | SC97Z | £0.00      |
| 47 | UZ01Z | £0.00      |
| 48 | VA10A | £569.25    |
| 49 | VA10B | £2,655.92  |
| 50 | VA10C | £3,280.54  |
| 51 | VA10D | £5,207.60  |
| 52 | VA11A | £857.58    |
| 53 |       |            |
| 54 |       |            |
| 55 |       |            |
| 56 |       |            |
| 57 |       |            |
| 58 |       |            |
| 59 |       |            |
| 60 |       |            |

|    |       |            |
|----|-------|------------|
| 1  |       |            |
| 2  |       |            |
| 3  |       |            |
| 4  | VA11B | £3,622.68  |
| 5  | VA11C | £1,163.69  |
| 6  | VA11D | £8,685.13  |
| 7  | VA12A | £4,935.13  |
| 8  | VA12B | £1,778.03  |
| 9  | VA12C | £7,170.38  |
| 10 | VA12D | £9,786.02  |
| 11 | VA13A | £5,525.23  |
| 12 | VA13B | £5,696.81  |
| 13 | VA13C | £8,641.99  |
| 14 | VA13D | £12,174.40 |
| 15 | VA14A | £7,821.35  |
| 16 | VA14D | £7,835.66  |
| 17 | VA15C | £15,836.28 |
| 18 | WA01W | £5,006.52  |
| 19 | WA01Y | £3,209.65  |
| 20 | WA02Z | £406.25    |
| 21 | WA03A | £4,572.79  |
| 22 | WA03B | £3,147.09  |
| 23 | WA03C | £2,223.86  |
| 24 | WA04Z | £1,214.85  |
| 25 | WA05Z | £3,334.39  |
| 26 | WA06A | £6,054.21  |
| 27 | WA06B | £450.56    |
| 28 | WA06C | £404.27    |
| 29 | WA07Z | £520.48    |
| 30 | WA08Z | £538.90    |
| 31 | WA09A | £4,100.05  |
| 32 | WA09B | £2,587.80  |
| 33 | WA09C | £1,968.41  |
| 34 | WA10Z | £2,088.53  |
| 35 | WA11A | £2,223.02  |
| 36 | WA11B | £412.34    |
| 37 | WA11C | £390.24    |
| 38 | WA12A | £6,114.94  |
| 39 | WA12B | £3,756.52  |
| 40 | WA12C | £2,821.56  |
| 41 | WA12D | £2,046.96  |
| 42 | WA14A | £374.61    |
| 43 | WA14B | £673.71    |
| 44 | WA15A | £7,799.86  |
| 45 | WA15B | £4,036.00  |
| 46 | WA15V | £1,059.85  |
| 47 | WA16W | £1,364.77  |
| 48 | WA16Y | £370.14    |
| 49 |       |            |
| 50 |       |            |
| 51 |       |            |
| 52 |       |            |
| 53 |       |            |
| 54 |       |            |
| 55 |       |            |
| 56 |       |            |
| 57 |       |            |
| 58 |       |            |
| 59 |       |            |
| 60 |       |            |

|    |       |           |
|----|-------|-----------|
| 1  |       |           |
| 2  |       |           |
| 3  |       |           |
| 4  | WA17A | £3,987.07 |
| 5  | WA17C | £1,580.32 |
| 6  | WA17D | £1,368.60 |
| 7  | WA18A | £4,264.16 |
| 8  | WA18B | £2,467.62 |
| 9  | WA18C | £451.85   |
| 10 | WA18D | £473.55   |
| 11 | WA18E | £1,661.02 |
| 12 | WA18F | £427.71   |
| 13 | WA19Z | £1,356.43 |
| 14 | WA20Z | £409.28   |
| 15 | WA21Z | £286.31   |
| 16 | WA22A | £3,165.03 |
| 17 | WA22B | £506.13   |
| 18 | WA22C | £1,929.65 |
| 19 | WA23A | £4,292.64 |
| 20 | WA23B | £1,826.64 |
| 21 | WA23C | £1,871.27 |
| 22 | WA24A | £1,281.84 |
| 23 | WA24B | £1,005.80 |
| 24 | WD11Z | £480.61   |
| 25 | WD22Z | £379.98   |
| 26 | WF01A | £0.00     |
| 27 | WF02A | £0.00     |
| 28 |       |           |
| 29 |       |           |
| 30 |       |           |
| 31 |       |           |
| 32 |       |           |
| 33 |       |           |
| 34 |       |           |
| 35 |       |           |
| 36 |       |           |
| 37 |       |           |
| 38 |       |           |
| 39 |       |           |
| 40 |       |           |
| 41 |       |           |
| 42 |       |           |
| 43 |       |           |
| 44 |       |           |
| 45 |       |           |
| 46 |       |           |
| 47 |       |           |
| 48 |       |           |
| 49 |       |           |
| 50 |       |           |
| 51 |       |           |
| 52 |       |           |
| 53 |       |           |
| 54 |       |           |
| 55 |       |           |
| 56 |       |           |
| 57 |       |           |
| 58 |       |           |
| 59 |       |           |
| 60 |       |           |

Source: NHS Digital. HRG4+ 2012/13 Reference Costs Grouper and Documentation. Available online:  
<http://content.digital.nhs.uk/article/4698/HRG4-201213-Reference-Costs-Grouper-and-Documentation>.

Table E. Unit costs of pain medications

| Product code <sup>1</sup> | Unit cost |
|---------------------------|-----------|
| 4                         | 0.877     |
| 7                         | 0.058     |
| 11                        | 0.041     |
| 15                        | 0.048     |
| 19                        | 0.058     |
| 40                        | 0.057     |
| 49                        | 0.036     |
| 53                        | 0.044     |
| 57                        | 0.058     |
| 83                        | 0.032     |
| 86                        | 0.046     |
| 96                        | 0.051     |
| 112                       | 0.061     |
| 120                       | 0.061     |
| 123                       | 0.862     |
| 124                       | 0.877     |
| 126                       | 0.023     |
| 129                       | 0.098     |
| 139                       | 0.058     |
| 140                       | 0.098     |
| 141                       | 0.121     |
| 156                       | 0.603     |
| 157                       | 0.311     |
| 158                       | 0.051     |
| 162                       | 0.057     |
| 177                       | 0.061     |
| 182                       | 0.035     |
| 187                       | 0.046     |
| 191                       | 0.107     |
| 213                       | 0.057     |
| 234                       | 0.962     |
| 249                       | 0.458     |
| 258                       | 0.058     |
| 259                       | 0.023     |
| 262                       | 0.877     |
| 296                       | 0.064     |
| 306                       | 0.057     |
| 320                       | 0.492     |
| 328                       | 1.044     |
| 332                       | 0.061     |
| 341                       | 0.121     |
| 354                       | 10.546    |

1  
2  
3  
4  
5  
6  
7  
8  
9  
10  
11  
12  
13  
14  
15  
16  
17  
18  
19  
20  
21  
22  
23  
24  
25  
26  
27  
28  
29  
30  
31  
32  
33  
34  
35  
36  
37  
38  
39  
40  
41  
42  
43  
44  
45  
46  
47  
48  
49  
50  
51  
52  
53  
54  
55  
56  
57  
58  
59  
60

|     |        |
|-----|--------|
| 360 | 0.936  |
| 382 | 0.038  |
| 387 | 0.267  |
| 389 | 0.135  |
| 392 | 0.057  |
| 396 | 0.101  |
| 402 | 0.057  |
| 407 | 0.098  |
| 416 | 0.057  |
| 417 | 0.057  |
| 423 | 0.458  |
| 447 | 0.207  |
| 458 | 0.166  |
| 462 | 2.37   |
| 474 | 0.359  |
| 487 | 0.036  |
| 495 | 0.046  |
| 497 | 0.076  |
| 499 | 0.057  |
| 526 | 0.161  |
| 539 | 0.128  |
| 551 | 5.06   |
| 580 | 0.207  |
| 586 | 0.057  |
| 589 | 0.057  |
| 595 | 0.036  |
| 597 | 0.057  |
| 607 | 0.262  |
| 612 | 0.076  |
| 617 | 0.493  |
| 620 | 3.598  |
| 625 | 0.058  |
| 628 | 0.076  |
| 635 | 2.37   |
| 647 | 0.936  |
| 649 | 0.076  |
| 650 | 0.718  |
| 655 | 0.633  |
| 656 | 0.058  |
| 659 | 0.192  |
| 660 | 0.042  |
| 661 | 0.045  |
| 676 | 0.829  |
| 685 | 45.472 |
| 687 | 0.155  |

|      |       |
|------|-------|
| 701  | 0.046 |
| 715  | 15    |
| 736  | 0.05  |
| 748  | 3.598 |
| 754  | 0.035 |
| 757  | 6.731 |
| 759  | 0.029 |
| 767  | 0.058 |
| 784  | 0.166 |
| 790  | 1.15  |
| 800  | 0.051 |
| 807  | 0.098 |
| 810  | 0.051 |
| 819  | 1.15  |
| 826  | 0.71  |
| 827  | 0.603 |
| 838  | 0.813 |
| 849  | 0.048 |
| 850  | 0.035 |
| 855  | 0.029 |
| 899  | 0.877 |
| 901  | 0.029 |
| 913  | 0.057 |
| 917  | 0.057 |
| 919  | 1.761 |
| 920  | 1.761 |
| 928  | 0.076 |
| 1030 | 0.016 |
| 1043 | 0.118 |
| 1051 | 0.076 |
| 1068 | 0.877 |
| 1073 | 0.064 |
| 1075 | 0.057 |
| 1086 | 0.098 |
| 1096 | 0.076 |
| 1115 | 0.311 |
| 1116 | 0.311 |
| 1139 | 0.076 |
| 1147 | 0.029 |
| 1156 | 0.061 |
| 1208 | 0.036 |
| 1210 | 0.076 |
| 1231 | 0.433 |
| 1233 | 0.207 |
| 1246 | 0.023 |

1  
2  
3  
4  
5  
6  
7  
8  
9  
10  
11  
12  
13  
14  
15  
16  
17  
18  
19  
20  
21  
22  
23  
24  
25  
26  
27  
28  
29  
30  
31  
32  
33  
34  
35  
36  
37  
38  
39  
40  
41  
42  
43  
44  
45  
46  
47  
48  
49  
50  
51  
52  
53  
54  
55  
56  
57  
58  
59  
60

|      |  |        |
|------|--|--------|
| 1261 |  | 0.051  |
| 1270 |  | 0.061  |
| 1392 |  | 0.138  |
| 1404 |  | 0.877  |
| 1446 |  | 0.057  |
| 1468 |  | 0.057  |
| 1469 |  | 0.045  |
| 1470 |  | 0.045  |
| 1496 |  | 0.076  |
| 1503 |  | 0.633  |
| 1544 |  | 0.052  |
| 1571 |  | 0.433  |
| 1584 |  | 0.072  |
| 1609 |  | 0.058  |
| 1621 |  | 0.057  |
| 1640 |  | 0.058  |
| 1688 |  | 0.05   |
| 1689 |  | 0.029  |
| 1692 |  | 0.057  |
| 1708 |  | 0.166  |
| 1739 |  | 0.048  |
| 1755 |  | 0.307  |
| 1766 |  | 0.207  |
| 1778 |  | 0.267  |
| 1808 |  | 70.239 |
| 1862 |  | 0.058  |
| 1866 |  | 0.098  |
| 1888 |  | 0.037  |
| 1983 |  | 0.023  |
| 1984 |  | 0.311  |
| 1999 |  | 1.38   |
| 2034 |  | 1.38   |
| 2040 |  | 0.058  |
| 2041 |  | 0.093  |
| 2047 |  | 0.057  |
| 2055 |  | 0.877  |
| 2129 |  | 0.138  |
| 2197 |  | 0.115  |
| 2200 |  | 0.061  |
| 2211 |  | 0.058  |
| 2234 |  | 0.153  |
| 2235 |  | 0.153  |
| 2243 |  | 0.035  |
| 2257 |  | 0.267  |
| 2288 |  | 0.045  |



|    |      |       |
|----|------|-------|
| 1  |      |       |
| 2  |      |       |
| 3  | 2293 | 0.829 |
| 4  | 2344 | 0.029 |
| 5  |      |       |
| 6  | 2366 | 0.195 |
| 7  |      |       |
| 8  | 2367 | 0.68  |
| 9  |      |       |
| 10 | 2382 | 0.267 |
| 11 |      |       |
| 12 | 2386 | 0.311 |
| 13 |      |       |
| 14 | 2387 | 0.207 |
| 15 |      |       |
| 16 | 2450 | 0.962 |
| 17 |      |       |
| 18 | 2462 | 0.877 |
| 19 |      |       |
| 20 | 2463 | 0.121 |
| 21 |      |       |
| 22 | 2486 | 0.036 |
| 23 |      |       |
| 24 | 2525 | 0.035 |
| 25 |      |       |
| 26 | 2555 | 0.041 |
| 27 |      |       |
| 28 | 2586 | 0.029 |
| 29 |      |       |
| 30 | 2606 | 0.036 |
| 31 |      |       |
| 32 | 2622 | 0.138 |
| 33 |      |       |
| 34 | 2671 | 0.05  |
| 35 |      |       |
| 36 | 2693 | 0.061 |
| 37 |      |       |
| 38 | 2794 | 0.051 |
| 39 |      |       |
| 40 | 2800 | 0.058 |
| 41 |      |       |
| 42 | 2827 | 0.121 |
| 43 |      |       |
| 44 | 2846 | 0.057 |
| 45 |      |       |
| 46 | 2858 | 0.052 |
| 47 |      |       |
| 48 | 2863 | 0.267 |
| 49 |      |       |
| 50 | 2904 | 0.207 |
| 51 |      |       |
| 52 | 2917 | 0.057 |
| 53 |      |       |
| 54 | 2936 | 0.596 |
| 55 |      |       |
| 56 | 2938 | 0.016 |
| 57 |      |       |
| 58 | 2952 | 0.013 |
| 59 |      |       |
| 60 | 2957 | 0.192 |
|    |      |       |
|    | 2966 | 0.458 |
|    |      |       |
|    | 2985 | 0.037 |
|    |      |       |
|    | 2986 | 0.057 |
|    |      |       |
|    | 2997 | 0.046 |
|    |      |       |
|    | 3043 | 0.813 |
|    |      |       |
|    | 3053 | 0.098 |
|    |      |       |
|    | 3064 | 0.22  |
|    |      |       |
|    | 3074 | 0.029 |
|    |      |       |
|    | 3077 | 0.036 |
|    |      |       |
|    | 3156 | 0.058 |
|    |      |       |
|    | 3165 | 2.808 |
|    |      |       |
|    | 3168 | 0.688 |
|    |      |       |
|    | 3170 | 0.045 |
|    |      |       |
|    | 3182 | 0.103 |
|    |      |       |
|    | 3183 | 0.596 |

1  
2  
3  
4  
5  
6  
7  
8  
9  
10  
11  
12  
13  
14  
15  
16  
17  
18  
19  
20  
21  
22  
23  
24  
25  
26  
27  
28  
29  
30  
31  
32  
33  
34  
35  
36  
37  
38  
39  
40  
41  
42  
43  
44  
45  
46  
47  
48  
49  
50  
51  
52  
53  
54  
55  
56  
57  
58  
59  
60

|      |       |
|------|-------|
| 3185 | 0.057 |
| 3216 | 0.061 |
| 3239 | 0.197 |
| 3266 | 0.103 |
| 3311 | 0.326 |
| 3313 | 0.028 |
| 3316 | 0.029 |
| 3326 | 0.433 |
| 3378 | 0.046 |
| 3409 | 0.307 |
| 3416 | 0.311 |
| 3421 | 0.207 |
| 3431 | 0.045 |
| 3432 | 0.115 |
| 3435 | 0.058 |
| 3490 | 0.032 |
| 3496 | 0.045 |
| 3522 | 0.101 |
| 3597 | 0.057 |
| 3599 | 0.098 |
| 3644 | 0.29  |
| 3653 | 1.219 |
| 3698 | 0.115 |
| 3710 | 0.307 |
| 3713 | 0.058 |
| 3724 | 0.058 |
| 3777 | 0.032 |
| 3794 | 0.118 |
| 3817 | 0.118 |
| 3852 | 0.311 |
| 3897 | 0.532 |
| 3901 | 0.098 |
| 3903 | 0.95  |
| 3919 | 0.046 |
| 3935 | 0.307 |
| 3958 | 0.076 |
| 3972 | 0.045 |
| 3974 | 0.577 |
| 4016 | 0.118 |
| 4043 | 9.402 |
| 4045 | 0.115 |
| 4095 | 0.158 |
| 4114 | 0.29  |
| 4115 | 0.29  |
| 4118 | 0.596 |

|    |      |        |
|----|------|--------|
| 1  |      |        |
| 2  |      |        |
| 3  | 4186 | 0.028  |
| 4  | 4196 | 2.107  |
| 5  |      |        |
| 6  | 4216 | 0.098  |
| 7  |      |        |
| 8  | 4266 | 0.046  |
| 9  | 4280 | 0.055  |
| 10 | 4298 | 0.057  |
| 11 | 4309 | 0.057  |
| 12 |      |        |
| 13 | 4320 | 0.453  |
| 14 | 4368 | 0.326  |
| 15 | 4369 | 0.057  |
| 16 |      |        |
| 17 | 4469 | 0.095  |
| 18 | 4476 | 0.371  |
| 19 | 4477 | 0.371  |
| 20 |      |        |
| 21 | 4506 | 0.207  |
| 22 | 4556 | 0.058  |
| 23 |      |        |
| 24 | 4564 | 0.095  |
| 25 | 4565 | 0.095  |
| 26 | 4600 | 0.877  |
| 27 | 4607 | 0.877  |
| 28 |      |        |
| 29 | 4625 | 0.207  |
| 30 | 4631 | 0.057  |
| 31 | 4633 | 0.877  |
| 32 |      |        |
| 33 | 4648 | 0.061  |
| 34 | 4671 | 0.051  |
| 35 | 4682 | 0.037  |
| 36 | 4690 | 0.032  |
| 37 |      |        |
| 38 | 4691 | 11.573 |
| 39 | 4692 | 0.057  |
| 40 |      |        |
| 41 | 4693 | 0.633  |
| 42 | 4710 | 0.023  |
| 43 |      |        |
| 44 | 4713 | 0.829  |
| 45 | 4731 | 0.016  |
| 46 | 4762 | 0.061  |
| 47 | 4781 | 0.05   |
| 48 | 4805 | 0.038  |
| 49 |      |        |
| 50 | 4806 | 0.311  |
| 51 |      |        |
| 52 | 4823 | 0.115  |
| 53 | 4834 | 0.406  |
| 54 | 4880 | 0.207  |
| 55 | 4911 | 0.048  |
| 56 | 4950 | 0.044  |
| 57 |      |        |
| 58 | 4965 | 0.307  |
| 59 | 4999 | 0.406  |
| 60 | 5025 | 70.239 |
|    | 5028 | 0.541  |

1  
2  
3  
4  
5  
6  
7  
8  
9  
10  
11  
12  
13  
14  
15  
16  
17  
18  
19  
20  
21  
22  
23  
24  
25  
26  
27  
28  
29  
30  
31  
32  
33  
34  
35  
36  
37  
38  
39  
40  
41  
42  
43  
44  
45  
46  
47  
48  
49  
50  
51  
52  
53  
54  
55  
56  
57  
58  
59  
60

|      |       |
|------|-------|
| 5048 | 6.731 |
| 5079 | 7.562 |
| 5080 | 0.718 |
| 5085 | 0.057 |
| 5137 | 0.315 |
| 5138 | 0.158 |
| 5169 | 0.541 |
| 5173 | 0.184 |
| 5175 | 0.359 |
| 5200 | 0.057 |
| 5221 | 0.104 |
| 5239 | 1.343 |
| 5243 | 0.058 |
| 5254 | 0.718 |
| 5257 | 0.406 |
| 5266 | 0.517 |
| 5268 | 0.098 |
| 5323 | 0.028 |
| 5339 | 0.059 |
| 5401 | 0.076 |
| 5407 | 0.453 |
| 5455 | 0.517 |
| 5482 | 0.684 |
| 5487 | 0.633 |
| 5535 | 0.633 |
| 5555 | 0.633 |
| 5563 | 0.262 |
| 5575 | 0.633 |
| 5585 | 0.461 |
| 5599 | 0.461 |
| 5648 | 0.057 |
| 5651 | 7.04  |
| 5652 | 0.5   |
| 5657 | 9.402 |
| 5664 | 0.166 |
| 5665 | 0.633 |
| 5668 | 7.562 |
| 5670 | 7.562 |
| 5681 | 0.046 |
| 5696 | 6.348 |
| 5697 | 6.609 |
| 5714 | 0.166 |
| 5767 | 0.061 |
| 5812 | 0.82  |
| 5833 | 4.409 |

|    |      |        |
|----|------|--------|
| 1  | 5840 | 0.633  |
| 2  |      |        |
| 3  | 5843 | 0.461  |
| 4  |      |        |
| 5  | 5896 | 0.061  |
| 6  |      |        |
| 7  | 5936 | 3.95   |
| 8  |      |        |
| 9  | 5938 | 0.861  |
| 10 | 5955 | 0.058  |
| 11 | 5991 | 0.586  |
| 12 |      |        |
| 13 | 6002 | 0.046  |
| 14 | 6035 | 0.052  |
| 15 | 6040 | 5.928  |
| 16 | 6056 | 0.886  |
| 17 |      |        |
| 18 | 6115 | 0.603  |
| 19 | 6153 | 0.406  |
| 20 |      |        |
| 21 | 6181 | 7.9    |
| 22 | 6208 | 0.603  |
| 23 | 6210 | 0.886  |
| 24 | 6215 | 0.541  |
| 25 | 6225 | 0.59   |
| 26 | 6226 | 45.472 |
| 27 |      |        |
| 28 | 6231 | 70.239 |
| 29 | 6232 | 0.262  |
| 30 | 6234 | 0.196  |
| 31 | 6249 | 0.195  |
| 32 | 6269 | 0.262  |
| 33 | 6298 | 9.402  |
| 34 | 6304 | 0.072  |
| 35 | 6312 | 0.035  |
| 36 | 6366 | 0.5    |
| 37 | 6414 | 3.025  |
| 38 | 6435 | 0.603  |
| 39 | 6458 | 7.562  |
| 40 | 6459 | 7.562  |
| 41 | 6464 | 0.718  |
| 42 | 6498 | 0.82   |
| 43 | 6547 | 0.378  |
| 44 | 6557 | 0.229  |
| 45 | 6558 | 0.155  |
| 46 | 6571 | 2.107  |
| 47 | 6584 | 1.15   |
| 48 | 6608 | 0.945  |
| 49 | 6609 | 1.928  |
| 50 | 6631 | 1.15   |
| 51 | 6699 | 1.195  |
| 52 | 6708 | 1.93   |
| 53 |      |        |
| 54 | 6736 | 0.262  |
| 55 |      |        |
| 56 |      |        |
| 57 |      |        |
| 58 |      |        |
| 59 |      |        |
| 60 |      |        |

1  
2  
3  
4  
5  
6  
7  
8  
9  
10  
11  
12  
13  
14  
15  
16  
17  
18  
19  
20  
21  
22  
23  
24  
25  
26  
27  
28  
29  
30  
31  
32  
33  
34  
35  
36  
37  
38  
39  
40  
41  
42  
43  
44  
45  
46  
47  
48  
49  
50  
51  
52  
53  
54  
55  
56  
57  
58  
59  
60

|      |        |
|------|--------|
| 6769 | 0.229  |
| 6790 | 0.229  |
| 6853 | 0.061  |
| 6879 | 3.95   |
| 6881 | 0.603  |
| 6886 | 0.051  |
| 6892 | 0.939  |
| 6917 | 5.928  |
| 6936 | 1.15   |
| 6948 | 3.578  |
| 6949 | 1.15   |
| 6999 | 1.138  |
| 7005 | 1.15   |
| 7058 | 0.016  |
| 7063 | 0.877  |
| 7072 | 0.038  |
| 7082 | 3.598  |
| 7104 | 0.058  |
| 7107 | 6.731  |
| 7114 | 4.315  |
| 7126 | 2.518  |
| 7141 | 0.061  |
| 7167 | 0.229  |
| 7197 | 0.192  |
| 7205 | 0.058  |
| 7208 | 1.138  |
| 7209 | 1.15   |
| 7236 | 7.888  |
| 7238 | 14.365 |
| 7261 | 0.061  |
| 7275 | 0.945  |
| 7334 | 4.4    |
| 7372 | 0.945  |
| 7389 | 0.945  |
| 7394 | 1.15   |
| 7397 | 9.402  |
| 7406 | 0.461  |
| 7428 | 0.059  |
| 7432 | 0.381  |
| 7434 | 0.532  |
| 7450 | 0.862  |
| 7457 | 0.492  |
| 7469 | 0.107  |
| 7488 | 0.118  |
| 7489 | 0.029  |

|    |      |        |
|----|------|--------|
| 1  |      |        |
| 2  |      |        |
| 3  |      |        |
| 4  | 7490 | 0.195  |
| 5  | 7499 | 0.057  |
| 6  | 7517 | 0.166  |
| 7  | 7518 | 0.057  |
| 8  | 7520 | 0.877  |
| 9  | 7524 | 0.307  |
| 10 | 7534 | 0.057  |
| 11 | 7535 | 0.057  |
| 12 | 7538 | 0.34   |
| 13 | 7542 | 0.057  |
| 14 | 7555 | 4.4    |
| 15 | 7667 | 0.158  |
| 16 | 7677 | 0.596  |
| 17 | 7678 | 0.95   |
| 18 | 7692 | 70.239 |
| 19 | 7729 | 0.633  |
| 20 | 7751 | 0.036  |
| 21 | 7780 | 0.596  |
| 22 | 7840 | 0.488  |
| 23 | 7849 | 8.543  |
| 24 | 7875 | 0.192  |
| 25 | 7913 | 0.267  |
| 26 | 7999 | 2.297  |
| 27 | 8017 | 0.22   |
| 28 | 8039 | 1.276  |
| 29 | 8040 | 3.028  |
| 30 | 8062 | 0.207  |
| 31 | 8075 | 0.964  |
| 32 | 8139 | 0.877  |
| 33 | 8233 | 0.057  |
| 34 | 8246 | 0.057  |
| 35 | 8329 | 0.057  |
| 36 | 8332 | 0.037  |
| 37 | 8335 | 0.058  |
| 38 | 8375 | 0.68   |
| 39 | 8385 | 0.488  |
| 40 | 8401 | 0.048  |
| 41 | 8416 | 0.541  |
| 42 | 8447 | 0.197  |
| 43 | 8451 | 0.326  |
| 44 | 8456 | 0.093  |
| 45 | 8493 | 0.773  |
| 46 | 8510 | 0.061  |
| 47 | 8600 | 0.307  |
| 48 | 8640 | 0.95   |
| 49 |      |        |
| 50 |      |        |
| 51 |      |        |
| 52 |      |        |
| 53 |      |        |
| 54 |      |        |
| 55 |      |        |
| 56 |      |        |
| 57 |      |        |
| 58 |      |        |
| 59 |      |        |
| 60 |      |        |

1  
2  
3  
4  
5  
6  
7  
8  
9  
10  
11  
12  
13  
14  
15  
16  
17  
18  
19  
20  
21  
22  
23  
24  
25  
26  
27  
28  
29  
30  
31  
32  
33  
34  
35  
36  
37  
38  
39  
40  
41  
42  
43  
44  
45  
46  
47  
48  
49  
50  
51  
52  
53  
54  
55  
56  
57  
58  
59  
60

|      |        |
|------|--------|
| 8663 | 0.098  |
| 8672 | 0.307  |
| 8726 | 0.032  |
| 8735 | 4.315  |
| 8740 | 0.192  |
| 8789 | 0.311  |
| 8822 | 0.371  |
| 8831 | 0.035  |
| 8866 | 0.235  |
| 8876 | 0.262  |
| 8878 | 0.032  |
| 8882 | 0.052  |
| 8969 | 0.136  |
| 9001 | 2.595  |
| 9012 | 4.409  |
| 9044 | 0.057  |
| 9053 | 37.365 |
| 9129 | 0.057  |
| 9137 | 0.262  |
| 9163 | 0.107  |
| 9183 | 0.586  |
| 9201 | 0.061  |
| 9209 | 0.155  |
| 9222 | 0.207  |
| 9231 | 0.029  |
| 9239 | 0.029  |
| 9271 | 1.38   |
| 9275 | 0.196  |
| 9313 | 0.155  |
| 9325 | 0.513  |
| 9329 | 0.877  |
| 9330 | 0.315  |
| 9331 | 0.513  |
| 9332 | 0.375  |
| 9337 | 0.192  |
| 9342 | 0.371  |
| 9371 | 1.041  |
| 9381 | 0.787  |
| 9389 | 0.046  |
| 9396 | 0.29   |
| 9421 | 0.036  |
| 9432 | 0.057  |
| 9439 | 9.402  |
| 9457 | 0.057  |
| 9460 | 0.057  |



|       |       |
|-------|-------|
| 9462  | 0.057 |
| 9465  | 0.311 |
| 9474  | 0.161 |
| 9476  | 0.058 |
| 9484  | 0.371 |
| 9500  | 0.207 |
| 9516  | 0.058 |
| 9557  | 0.166 |
| 9562  | 0.044 |
| 9602  | 0.055 |
| 9615  | 0.158 |
| 9630  | 0.052 |
| 9637  | 0.184 |
| 9672  | 0.586 |
| 9688  | 0.207 |
| 9712  | 0.028 |
| 9728  | 0.013 |
| 9736  | 0.262 |
| 9739  | 0.29  |
| 9742  | 0.057 |
| 9785  | 0.058 |
| 9822  | 0.861 |
| 9855  | 0.058 |
| 9874  | 1.928 |
| 9886  | 0.057 |
| 9914  | 0.028 |
| 9917  | 0.058 |
| 9927  | 1.93  |
| 9928  | 3.025 |
| 9945  | 0.235 |
| 9960  | 0.371 |
| 9966  | 0.59  |
| 9973  | 0.461 |
| 10007 | 0.042 |
| 10021 | 3.578 |
| 10023 | 0.107 |
| 10033 | 0.136 |
| 10077 | 0.378 |
| 10122 | 0.041 |
| 10149 | 0.057 |
| 10169 | 0.307 |
| 10176 | 0.058 |
| 10178 | 0.058 |
| 10189 | 1.15  |
| 10196 | 0.058 |

1  
2  
3  
4  
5  
6  
7  
8  
9  
10  
11  
12  
13  
14  
15  
16  
17  
18  
19  
20  
21  
22  
23  
24  
25  
26  
27  
28  
29  
30  
31  
32  
33  
34  
35  
36  
37  
38  
39  
40  
41  
42  
43  
44  
45  
46  
47  
48  
49  
50  
51  
52  
53  
54  
55  
56  
57  
58  
59  
60

|       |        |
|-------|--------|
| 10205 | 7.888  |
| 10209 | 0.057  |
| 10226 | 0.058  |
| 10239 | 1.301  |
| 10265 | 0.061  |
| 10295 | 0.153  |
| 10309 | 1.219  |
| 10325 | 0.158  |
| 10336 | 0.381  |
| 10509 | 0.862  |
| 10558 | 0.076  |
| 10582 | 0.057  |
| 10583 | 0.862  |
| 10589 | 0.095  |
| 10602 | 0.058  |
| 10625 | 0.688  |
| 10631 | 0.046  |
| 10678 | 0.095  |
| 10701 | 0.057  |
| 10730 | 0.046  |
| 10748 | 0.058  |
| 10769 | 1.044  |
| 10785 | 0.166  |
| 10792 | 0.057  |
| 10866 | 1.361  |
| 10917 | 0.311  |
| 10922 | 11.573 |
| 10925 | 1.92   |
| 10978 | 0.076  |
| 10993 | 0.029  |
| 11009 | 0.057  |
| 11101 | 0.046  |
| 11129 | 45.472 |
| 11168 | 0.311  |
| 11215 | 0.076  |
| 11250 | 0.058  |
| 11275 | 0.865  |
| 11322 | 0.207  |
| 11325 | 0.057  |
| 11342 | 0.633  |
| 11405 | 0.461  |
| 11461 | 0.166  |
| 11466 | 0.153  |
| 11471 | 0.865  |
| 11495 | 0.307  |

|    |       |       |
|----|-------|-------|
| 1  |       |       |
| 2  |       |       |
| 3  | 11522 | 0.603 |
| 4  | 11540 | 0.603 |
| 5  |       |       |
| 6  | 11549 | 0.473 |
| 7  | 11550 | 0.057 |
| 8  |       |       |
| 9  | 11554 | 0.057 |
| 10 | 11559 | 0.046 |
| 11 | 11584 | 7.9   |
| 12 |       |       |
| 13 | 11614 | 0.058 |
| 14 | 11665 | 0.058 |
| 15 | 11698 | 0.192 |
| 16 |       |       |
| 17 | 11722 | 0.08  |
| 18 | 11734 | 0.046 |
| 19 | 11746 | 0.792 |
| 20 | 11748 | 1.08  |
| 21 |       |       |
| 22 | 11755 | 0.262 |
| 23 | 11801 | 1.92  |
| 24 | 11807 | 0.057 |
| 25 |       |       |
| 26 | 11837 | 0.59  |
| 27 | 11838 | 1.276 |
| 28 | 11843 | 6.506 |
| 29 |       |       |
| 30 | 11907 | 0.166 |
| 31 | 11942 | 0.118 |
| 32 | 11961 | 0.057 |
| 33 |       |       |
| 34 | 11963 | 0.035 |
| 35 | 11970 | 0.035 |
| 36 | 11971 | 0.633 |
| 37 | 11980 | 0.048 |
| 38 | 11982 | 2.518 |
| 39 | 11986 | 0.029 |
| 40 |       |       |
| 41 | 11995 | 0.433 |
| 42 | 11999 | 0.433 |
| 43 | 12000 | 0.433 |
| 44 | 12020 | 2.595 |
| 45 | 12075 | 0.577 |
| 46 | 12122 | 0.135 |
| 47 | 12171 | 0.057 |
| 48 | 12219 | 4.409 |
| 49 | 12353 | 0.95  |
| 50 | 12394 | 0.877 |
| 51 | 12447 | 0.877 |
| 52 | 12549 | 0.596 |
| 53 | 12591 | 0.371 |
| 54 | 12602 | 0.046 |
| 55 | 12604 | 0.586 |
| 56 |       |       |
| 57 | 12709 | 0.057 |
| 58 |       |       |
| 59 |       |       |
| 60 |       |       |

1  
2  
3  
4  
5  
6  
7  
8  
9  
10  
11  
12  
13  
14  
15  
16  
17  
18  
19  
20  
21  
22  
23  
24  
25  
26  
27  
28  
29  
30  
31  
32  
33  
34  
35  
36  
37  
38  
39  
40  
41  
42  
43  
44  
45  
46  
47  
48  
49  
50  
51  
52  
53  
54  
55  
56  
57  
58  
59  
60

|       |        |
|-------|--------|
| 12776 | 0.061  |
| 12889 | 0.262  |
| 12900 | 0.192  |
| 12992 | 0.057  |
| 13031 | 0.22   |
| 13076 | 6.506  |
| 13083 | 0.061  |
| 13114 | 0.046  |
| 13117 | 0.192  |
| 13172 | 4.409  |
| 13225 | 4.409  |
| 13280 | 4.409  |
| 13300 | 14.365 |
| 13347 | 0.135  |
| 13380 | 0.684  |
| 13420 | 4.315  |
| 13459 | 0.064  |
| 13606 | 0.061  |
| 13627 | 0.045  |
| 13639 | 0.05   |
| 13711 | 0.262  |
| 13807 | 0.061  |
| 13813 | 0.046  |
| 13818 | 0.153  |
| 13893 | 0.057  |
| 13995 | 1.276  |
| 13997 | 0.586  |
| 14050 | 0.586  |
| 14063 | 0.586  |
| 14084 | 0.207  |
| 14085 | 0.311  |
| 14086 | 1.12   |
| 14156 | 0.633  |
| 14226 | 0.192  |
| 14333 | 0.048  |
| 14378 | 0.058  |
| 14385 | 0.057  |
| 14476 | 0.076  |
| 14490 | 0.046  |
| 14534 | 0.035  |
| 14541 | 0.262  |
| 14551 | 0.877  |
| 14570 | 0.061  |
| 14578 | 0.773  |
| 14602 | 0.128  |

|    |       |        |
|----|-------|--------|
| 1  | 14627 | 0.877  |
| 2  |       |        |
| 3  | 14672 | 0.207  |
| 4  |       |        |
| 5  | 14676 | 0.057  |
| 6  |       |        |
| 7  | 14678 | 0.311  |
| 8  |       |        |
| 9  | 14688 | 0.107  |
| 10 |       |        |
| 11 | 14707 | 0.311  |
| 12 |       |        |
| 13 | 14776 | 0.267  |
| 14 |       |        |
| 15 | 14785 | 0.057  |
| 16 |       |        |
| 17 | 14829 | 0.058  |
| 18 |       |        |
| 19 | 14884 | 0.603  |
| 20 |       |        |
| 21 | 14899 | 0.028  |
| 22 |       |        |
| 23 | 14900 | 11.573 |
| 24 |       |        |
| 25 | 14901 | 0.603  |
| 26 |       |        |
| 27 | 14912 | 0.057  |
| 28 |       |        |
| 29 | 14935 | 4.409  |
| 30 |       |        |
| 31 | 14964 | 0.058  |
| 32 |       |        |
| 33 | 15005 | 0.061  |
| 34 |       |        |
| 35 | 15023 | 0.115  |
| 36 |       |        |
| 37 | 15068 | 0.048  |
| 38 |       |        |
| 39 | 15104 | 0.098  |
| 40 |       |        |
| 41 | 15159 | 1.275  |
| 42 |       |        |
| 43 | 15180 | 0.098  |
| 44 |       |        |
| 45 | 15198 | 0.041  |
| 46 |       |        |
| 47 | 15201 | 0.057  |
| 48 |       |        |
| 49 | 15238 | 0.058  |
| 50 |       |        |
| 51 | 15286 | 0.813  |
| 52 |       |        |
| 53 | 15337 | 7.015  |
| 54 |       |        |
| 55 | 15339 | 0.235  |
| 56 |       |        |
| 57 | 15353 | 45.472 |
| 58 |       |        |
| 59 | 15361 | 6.915  |
| 60 |       |        |
|    | 15367 | 0.877  |
|    |       |        |
|    | 15501 | 0.195  |
|    |       |        |
|    | 15732 | 0.057  |
|    |       |        |
|    | 15767 | 0.061  |
|    |       |        |
|    | 15779 | 0.057  |
|    |       |        |
|    | 15781 | 0.787  |
|    |       |        |
|    | 15792 | 0.375  |
|    |       |        |
|    | 15793 | 4.315  |
|    |       |        |
|    | 15798 | 1.001  |
|    |       |        |
|    | 15815 | 0.5    |
|    |       |        |
|    | 15831 | 0.051  |
|    |       |        |
|    | 15845 | 0.058  |
|    |       |        |
|    | 15871 | 1.343  |
|    |       |        |
|    | 15930 | 0.061  |
|    |       |        |
|    | 15950 | 1.276  |

1  
2  
3  
4  
5  
6  
7  
8  
9  
10  
11  
12  
13  
14  
15  
16  
17  
18  
19  
20  
21  
22  
23  
24  
25  
26  
27  
28  
29  
30  
31  
32  
33  
34  
35  
36  
37  
38  
39  
40  
41  
42  
43  
44  
45  
46  
47  
48  
49  
50  
51  
52  
53  
54  
55  
56  
57  
58  
59  
60

|       |       |
|-------|-------|
| 15964 | 0.371 |
| 16001 | 0.057 |
| 16039 | 0.057 |
| 16076 | 0.473 |
| 16096 | 0.057 |
| 16106 | 0.058 |
| 16112 | 0.877 |
| 16189 | 4.409 |
| 16192 | 0.057 |
| 16193 | 0.138 |
| 16194 | 0.326 |
| 16215 | 0.05  |
| 16221 | 0.076 |
| 16222 | 0.057 |
| 16225 | 0.311 |
| 16271 | 0.792 |
| 16272 | 0.311 |
| 16273 | 0.192 |
| 16286 | 0.207 |
| 16335 | 4.409 |
| 16395 | 0.541 |
| 16467 | 0.051 |
| 16473 | 0.153 |
| 16474 | 0.153 |
| 16509 | 1.15  |
| 16542 | 1.15  |
| 16592 | 0.057 |
| 16618 | 9.402 |
| 16818 | 0.057 |
| 17029 | 0.207 |
| 17030 | 0.207 |
| 17043 | 0.71  |
| 17068 | 0.061 |
| 17073 | 6.915 |
| 17124 | 0.311 |
| 17126 | 0.207 |
| 17128 | 0.057 |
| 17158 | 0.058 |
| 17165 | 0.098 |
| 17183 | 0.596 |
| 17201 | 0.098 |
| 17386 | 0.962 |
| 17398 | 4.409 |
| 17412 | 0.058 |
| 17491 | 0.207 |

|    |       |        |
|----|-------|--------|
| 1  |       |        |
| 2  |       |        |
| 3  | 17525 | 0.311  |
| 4  | 17532 | 0.311  |
| 5  |       |        |
| 6  | 17563 | 0.058  |
| 7  | 17564 | 0.104  |
| 8  |       |        |
| 9  | 17572 | 0.577  |
| 10 | 17671 | 1.128  |
| 11 | 17680 | 0.076  |
| 12 |       |        |
| 13 | 17733 | 0.098  |
| 14 | 17750 | 0.061  |
| 15 | 17754 | 0.095  |
| 16 | 17818 | 0.433  |
| 17 | 17863 | 1.044  |
| 18 | 17893 | 0.371  |
| 19 | 17896 | 1.128  |
| 20 | 17917 | 0.107  |
| 21 | 17926 | 0.057  |
| 22 |       |        |
| 23 | 17936 | 1.276  |
| 24 | 17943 | 0.262  |
| 25 | 17998 | 0.058  |
| 26 | 18151 | 0.603  |
| 27 | 18166 | 1.276  |
| 28 | 18174 | 7.04   |
| 29 | 18196 | 0.016  |
| 30 |       |        |
| 31 | 18211 | 0.386  |
| 32 | 18221 | 0.038  |
| 33 | 18234 | 0.076  |
| 34 | 18342 | 0.036  |
| 35 | 18364 | 0.048  |
| 36 | 18371 | 0.311  |
| 37 | 18441 | 1.195  |
| 38 | 18448 | 0.158  |
| 39 | 18491 | 0.458  |
| 40 | 18527 | 0.048  |
| 41 | 18560 | 42.859 |
| 42 | 18566 | 4.409  |
| 43 | 18647 | 0.813  |
| 44 | 18656 | 0.046  |
| 45 | 18662 | 0.076  |
| 46 | 18700 | 0.192  |
| 47 | 18734 | 0.586  |
| 48 | 18792 | 0.235  |
| 49 | 18798 | 0.057  |
| 50 | 18799 | 1.343  |
| 51 | 18800 | 0.59   |
| 52 | 18801 | 0.586  |
| 53 |       |        |
| 54 |       |        |
| 55 |       |        |
| 56 |       |        |
| 57 |       |        |
| 58 |       |        |
| 59 |       |        |
| 60 |       |        |

1  
2  
3  
4  
5  
6  
7  
8  
9  
10  
11  
12  
13  
14  
15  
16  
17  
18  
19  
20  
21  
22  
23  
24  
25  
26  
27  
28  
29  
30  
31  
32  
33  
34  
35  
36  
37  
38  
39  
40  
41  
42  
43  
44  
45  
46  
47  
48  
49  
50  
51  
52  
53  
54  
55  
56  
57  
58  
59  
60

|       |       |
|-------|-------|
| 18812 | 0.057 |
| 18820 | 0.016 |
| 18881 | 0.046 |
| 18921 | 0.076 |
| 18922 | 0.058 |
| 19007 | 0.098 |
| 19036 | 0.057 |
| 19046 | 0.048 |
| 19092 | 0.5   |
| 19116 | 0.458 |
| 19139 | 0.058 |
| 19146 | 8.77  |
| 19206 | 0.058 |
| 19291 | 0.262 |
| 19317 | 0.057 |
| 19320 | 0.307 |
| 19382 | 0.207 |
| 19398 | 0.061 |
| 19449 | 0.192 |
| 19471 | 0.371 |
| 19477 | 0.586 |
| 19575 | 0.057 |
| 19764 | 0.057 |
| 19779 | 0.035 |
| 19954 | 1.902 |
| 19972 | 1.902 |
| 19993 | 0.29  |
| 20005 | 4.409 |
| 20026 | 0.036 |
| 20036 | 1.275 |
| 20059 | 0.267 |
| 20068 | 0.028 |
| 20105 | 0.076 |
| 20116 | 0.058 |
| 20127 | 0.057 |
| 20310 | 0.046 |
| 20384 | 0.311 |
| 20385 | 0.098 |
| 20386 | 0.326 |
| 20395 | 0.207 |
| 20403 | 0.877 |
| 20442 | 0.061 |
| 20565 | 0.057 |
| 20571 | 0.773 |
| 20621 | 0.207 |



|    |       |       |
|----|-------|-------|
| 1  |       |       |
| 2  |       |       |
| 3  | 20650 | 0.877 |
| 4  | 20783 | 0.192 |
| 5  | 20805 | 0.207 |
| 6  | 20815 | 0.262 |
| 7  | 20967 | 0.061 |
| 8  | 20978 | 0.057 |
| 9  | 21045 | 0.048 |
| 10 | 21050 | 0.433 |
| 11 | 21081 | 0.035 |
| 12 | 21113 | 0.044 |
| 13 | 21123 | 0.307 |
| 14 | 21229 | 0.877 |
| 15 | 21251 | 0.058 |
| 16 | 21256 | 0.046 |
| 17 | 21275 | 1.001 |
| 18 | 21285 | 2.854 |
| 19 | 21387 | 0.057 |
| 20 | 21397 | 1.08  |
| 21 | 21419 | 0.158 |
| 22 | 21421 | 0.166 |
| 23 | 21444 | 0.076 |
| 24 | 21562 | 0.013 |
| 25 | 21610 | 0.311 |
| 26 | 21673 | 0.057 |
| 27 | 21703 | 0.057 |
| 28 | 21745 | 0.052 |
| 29 | 21777 | 0.541 |
| 30 | 21797 | 0.541 |
| 31 | 21807 | 0.076 |
| 32 | 21811 | 0.057 |
| 33 | 21813 | 0.048 |
| 34 | 21815 | 0.098 |
| 35 | 21816 | 0.098 |
| 36 | 21821 | 0.098 |
| 37 | 21824 | 0.057 |
| 38 | 21831 | 0.023 |
| 39 | 21840 | 0.045 |
| 40 | 21843 | 0.115 |
| 41 | 21846 | 0.307 |
| 42 | 21864 | 0.121 |
| 43 | 21880 | 0.051 |
| 44 | 21947 | 0.406 |
| 45 | 21952 | 8.77  |
| 46 | 21955 | 0.813 |
| 47 | 22014 | 0.029 |
| 48 |       |       |
| 49 |       |       |
| 50 |       |       |
| 51 |       |       |
| 52 |       |       |
| 53 |       |       |
| 54 |       |       |
| 55 |       |       |
| 56 |       |       |
| 57 |       |       |
| 58 |       |       |
| 59 |       |       |
| 60 |       |       |

1  
2  
3  
4  
5  
6  
7  
8  
9  
10  
11  
12  
13  
14  
15  
16  
17  
18  
19  
20  
21  
22  
23  
24  
25  
26  
27  
28  
29  
30  
31  
32  
33  
34  
35  
36  
37  
38  
39  
40  
41  
42  
43  
44  
45  
46  
47  
48  
49  
50  
51  
52  
53  
54  
55  
56  
57  
58  
59  
60

|       |       |
|-------|-------|
| 22024 | 0.046 |
| 22026 | 0.192 |
| 22066 | 6.731 |
| 22070 | 0.032 |
| 22206 | 0.166 |
| 22230 | 0.023 |
| 22288 | 0.028 |
| 22305 | 0.877 |
| 22380 | 1.236 |
| 22571 | 0.939 |
| 22690 | 1.041 |
| 22756 | 0.192 |
| 22764 | 0.058 |
| 23026 | 0.076 |
| 23060 | 1.276 |
| 23077 | 0.029 |
| 23114 | 0.029 |
| 23121 | 0.098 |
| 23158 | 0.16  |
| 23204 | 0.076 |
| 23323 | 0.098 |
| 23420 | 0.128 |
| 23425 | 0.057 |
| 23442 | 0.71  |
| 23617 | 0.877 |
| 23625 | 0.406 |
| 23716 | 0.058 |
| 23795 | 1.761 |
| 23840 | 0.058 |
| 23952 | 0.058 |
| 23981 | 0.406 |
| 24000 | 0.058 |
| 24007 | 0.098 |
| 24020 | 0.045 |
| 24075 | 0.058 |
| 24086 | 0.061 |
| 24108 | 7.562 |
| 24121 | 0.076 |
| 24122 | 0.057 |
| 24125 | 0.057 |
| 24128 | 0.076 |
| 24133 | 0.058 |
| 24134 | 0.036 |
| 24137 | 0.061 |
| 24141 | 0.032 |

|       |        |
|-------|--------|
| 24145 | 0.036  |
| 24147 | 0.036  |
| 24152 | 0.032  |
| 24193 | 0.061  |
| 24212 | 0.05   |
| 24236 | 0.311  |
| 24305 | 0.048  |
| 24308 | 0.076  |
| 24320 | 0.05   |
| 24343 | 0.08   |
| 24356 | 0.136  |
| 24361 | 0.16   |
| 24383 | 0.29   |
| 24440 | 0.013  |
| 24453 | 0.586  |
| 24469 | 0.936  |
| 24531 | 0.577  |
| 24534 | 0.058  |
| 24584 | 1.128  |
| 24617 | 0.036  |
| 24640 | 8.543  |
| 24680 | 0.032  |
| 24682 | 0.577  |
| 24736 | 2.854  |
| 24828 | 0.057  |
| 24830 | 4.436  |
| 24867 | 0.458  |
| 24887 | 0.057  |
| 24947 | 0.058  |
| 24986 | 7.014  |
| 25109 | 0.058  |
| 25185 | 0.493  |
| 25199 | 6.348  |
| 25205 | 0.936  |
| 25257 | 0.057  |
| 25283 | 0.057  |
| 25329 | 0.076  |
| 25330 | 0.057  |
| 25341 | 0.045  |
| 25342 | 0.098  |
| 25358 | 0.057  |
| 25361 | 0.076  |
| 25362 | 0.076  |
| 25481 | 10.546 |
| 25514 | 0.057  |

1  
2  
3  
4  
5  
6  
7  
8  
9  
10  
11  
12  
13  
14  
15  
16  
17  
18  
19  
20  
21  
22  
23  
24  
25  
26  
27  
28  
29  
30  
31  
32  
33  
34  
35  
36  
37  
38  
39  
40  
41  
42  
43  
44  
45  
46  
47  
48  
49  
50  
51  
52  
53  
54  
55  
56  
57  
58  
59  
60

|       |        |
|-------|--------|
| 25529 | 0.057  |
| 25619 | 0.048  |
| 25643 | 0.267  |
| 25701 | 0.813  |
| 25750 | 0.045  |
| 25790 | 0.076  |
| 25794 | 0.048  |
| 25800 | 0.936  |
| 25815 | 0.357  |
| 25833 | 1.044  |
| 25895 | 0.058  |
| 26021 | 7.014  |
| 26083 | 1.761  |
| 26095 | 0.048  |
| 26115 | 45.472 |
| 26133 | 0.058  |
| 26159 | 0.061  |
| 26165 | 0.057  |
| 26213 | 0.032  |
| 26216 | 0.098  |
| 26231 | 0.098  |
| 26234 | 0.121  |
| 26242 | 0.045  |
| 26247 | 0.064  |
| 26277 | 0.013  |
| 26283 | 0.046  |
| 26284 | 0.586  |
| 26291 | 0.877  |
| 26336 | 0.792  |
| 26351 | 0.207  |
| 26522 | 0.064  |
| 26575 | 0.161  |
| 26631 | 0.311  |
| 26746 | 0.058  |
| 26888 | 0.311  |
| 26908 | 6.609  |
| 26967 | 0.877  |
| 26970 | 0.936  |
| 26986 | 0.541  |
| 26988 | 0.058  |
| 27008 | 0.037  |
| 27013 | 0.813  |
| 27055 | 0.057  |
| 27058 | 0.371  |
| 27064 | 0.877  |

|    |       |        |
|----|-------|--------|
| 1  |       |        |
| 2  |       |        |
| 3  | 27082 | 0.433  |
| 4  | 27197 | 0.877  |
| 5  |       |        |
| 6  | 27200 | 0.311  |
| 7  | 27362 | 0.311  |
| 8  |       |        |
| 9  | 27366 | 0.098  |
| 10 | 27441 | 0.633  |
| 11 | 27446 | 0.877  |
| 12 | 27452 | 0.058  |
| 13 | 27454 | 0.072  |
| 14 | 27459 | 0.058  |
| 15 |       |        |
| 16 | 27484 | 0.16   |
| 17 |       |        |
| 18 | 27490 | 0.16   |
| 19 | 27591 | 0.406  |
| 20 | 27677 | 0.829  |
| 21 | 27749 | 1.301  |
| 22 | 27778 | 0.036  |
| 23 | 27782 | 0.048  |
| 24 | 27783 | 0.048  |
| 25 | 27784 | 0.058  |
| 26 | 27785 | 0.051  |
| 27 | 27856 | 0.877  |
| 28 | 27968 | 0.048  |
| 29 | 28168 | 0.057  |
| 30 | 28172 | 0.166  |
| 31 | 28189 | 11.573 |
| 32 | 28211 | 0.028  |
| 33 | 28255 | 0.045  |
| 34 | 28256 | 0.057  |
| 35 | 28328 | 0.013  |
| 36 | 28332 | 0.577  |
| 37 | 28344 | 0.058  |
| 38 | 28346 | 0.058  |
| 39 | 28348 | 0.057  |
| 40 | 28390 | 0.076  |
| 41 | 28421 | 0.633  |
| 42 | 28479 | 0.166  |
| 43 | 28553 | 0.057  |
| 44 | 28598 | 0.107  |
| 45 | 28636 | 0.877  |
| 46 | 28695 | 0.121  |
| 47 | 28711 | 4.315  |
| 48 | 28712 | 0.029  |
| 49 | 28713 | 0.34   |
| 50 | 28728 | 0.792  |
| 51 | 28764 | 0.311  |
| 52 |       |        |
| 53 |       |        |
| 54 |       |        |
| 55 |       |        |
| 56 |       |        |
| 57 |       |        |
| 58 |       |        |
| 59 |       |        |
| 60 |       |        |

1  
2  
3  
4  
5  
6  
7  
8  
9  
10  
11  
12  
13  
14  
15  
16  
17  
18  
19  
20  
21  
22  
23  
24  
25  
26  
27  
28  
29  
30  
31  
32  
33  
34  
35  
36  
37  
38  
39  
40  
41  
42  
43  
44  
45  
46  
47  
48  
49  
50  
51  
52  
53  
54  
55  
56  
57  
58  
59  
60

|       |       |
|-------|-------|
| 28780 | 0.041 |
| 28784 | 0.057 |
| 28816 | 0.098 |
| 28878 | 0.877 |
| 28888 | 0.057 |
| 28900 | 0.061 |
| 28955 | 0.058 |
| 29014 | 2.808 |
| 29020 | 1.276 |
| 29037 | 0.311 |
| 29068 | 0.048 |
| 29181 | 0.207 |
| 29232 | 0.061 |
| 29304 | 1.128 |
| 29316 | 0.048 |
| 29324 | 0.473 |
| 29330 | 0.057 |
| 29332 | 0.936 |
| 29342 | 0.058 |
| 29345 | 0.936 |
| 29352 | 0.936 |
| 29373 | 0.057 |
| 29426 | 0.71  |
| 29455 | 0.311 |
| 29465 | 0.307 |
| 29480 | 6.915 |
| 29488 | 0.058 |
| 29500 | 4.315 |
| 29524 | 0.098 |
| 29577 | 7.015 |
| 29587 | 0.048 |
| 29704 | 0.057 |
| 29749 | 0.057 |
| 29772 | 0.813 |
| 29860 | 0.046 |
| 29898 | 0.633 |
| 29951 | 1.343 |
| 30021 | 0.057 |
| 30049 | 15    |
| 30070 | 0.058 |
| 30123 | 0.058 |
| 30164 | 0.166 |
| 30165 | 0.107 |
| 30168 | 0.045 |
| 30243 | 0.057 |

|       |       |
|-------|-------|
| 30252 | 0.633 |
| 30282 | 0.207 |
| 30295 | 0.107 |
| 30297 | 0.057 |
| 30327 | 0.813 |
| 30382 | 0.057 |
| 30389 | 0.023 |
| 30391 | 0.064 |
| 30444 | 0.041 |
| 30514 | 3.028 |
| 30531 | 0.013 |
| 30556 | 0.058 |
| 30698 | 7.562 |
| 30724 | 0.936 |
| 30761 | 0.235 |
| 30790 | 0.207 |
| 30806 | 0.057 |
| 30811 | 0.166 |
| 30849 | 0.207 |
| 30892 | 0.936 |
| 30923 | 0.311 |
| 30942 | 0.057 |
| 30954 | 0.877 |
| 30966 | 0.877 |
| 30982 | 0.098 |
| 30984 | 0.877 |
| 30994 | 0.877 |
| 31033 | 4.315 |
| 31053 | 3.598 |
| 31054 | 0.061 |
| 31064 | 0.577 |
| 31105 | 0.541 |
| 31107 | 0.406 |
| 31151 | 0.058 |
| 31155 | 0.058 |
| 31178 | 0.036 |
| 31196 | 0.058 |
| 31253 | 0.71  |
| 31257 | 0.058 |
| 31383 | 0.207 |
| 31429 | 0.045 |
| 31452 | 0.051 |
| 31469 | 0.098 |
| 31482 | 0.057 |
| 31540 | 5.06  |

1  
2  
3  
4  
5  
6  
7  
8  
9  
10  
11  
12  
13  
14  
15  
16  
17  
18  
19  
20  
21  
22  
23  
24  
25  
26  
27  
28  
29  
30  
31  
32  
33  
34  
35  
36  
37  
38  
39  
40  
41  
42  
43  
44  
45  
46  
47  
48  
49  
50  
51  
52  
53  
54  
55  
56  
57  
58  
59  
60

|       |       |
|-------|-------|
| 31577 | 0.051 |
| 31582 | 0.862 |
| 31584 | 0.862 |
| 31589 | 0.207 |
| 31650 | 4.409 |
| 31700 | 0.038 |
| 31734 | 1.08  |
| 31777 | 0.307 |
| 31787 | 0.207 |
| 31871 | 0.057 |
| 31885 | 0.71  |
| 31894 | 0.057 |
| 31916 | 0.433 |
| 31935 | 0.962 |
| 31943 | 0.051 |
| 31944 | 0.076 |
| 31945 | 0.098 |
| 31950 | 0.057 |
| 31959 | 0.05  |
| 31960 | 4.315 |
| 31962 | 0.813 |
| 32090 | 0.064 |
| 32093 | 0.877 |
| 32097 | 0.076 |
| 32100 | 0.098 |
| 32105 | 0.064 |
| 32108 | 0.076 |
| 32136 | 0.057 |
| 32163 | 0.058 |
| 32165 | 0.046 |
| 32227 | 0.813 |
| 32234 | 0.064 |
| 32237 | 0.013 |
| 32242 | 0.048 |
| 32365 | 0.048 |
| 32366 | 0.057 |
| 32425 | 3.025 |
| 32436 | 0.057 |
| 32439 | 0.036 |
| 32450 | 1.08  |
| 32509 | 0.057 |
| 32519 | 0.877 |
| 32520 | 0.046 |
| 32536 | 0.076 |
| 32554 | 0.877 |



|    |       |       |
|----|-------|-------|
| 1  | 32601 | 0.311 |
| 2  |       |       |
| 3  |       |       |
| 4  | 32626 | 0.877 |
| 5  |       |       |
| 6  | 32641 | 0.061 |
| 7  |       |       |
| 8  | 32688 | 7.562 |
| 9  |       |       |
| 10 | 32692 | 0.058 |
| 11 |       |       |
| 12 | 32766 | 1.236 |
| 13 |       |       |
| 14 | 32831 | 0.71  |
| 15 |       |       |
| 16 | 32839 | 0.058 |
| 17 |       |       |
| 18 | 32854 | 0.207 |
| 19 |       |       |
| 20 | 32862 | 0.936 |
| 21 |       |       |
| 22 | 32875 | 0.048 |
| 23 |       |       |
| 24 | 32891 | 0.877 |
| 25 |       |       |
| 26 | 32897 | 7.562 |
| 27 |       |       |
| 28 | 32916 | 0.207 |
| 29 |       |       |
| 30 | 32926 | 0.041 |
| 31 |       |       |
| 32 | 32970 | 0.058 |
| 33 |       |       |
| 34 | 32993 | 2.107 |
| 35 |       |       |
| 36 | 33060 | 0.058 |
| 37 |       |       |
| 38 | 33068 | 1.128 |
| 39 |       |       |
| 40 | 33090 | 0.032 |
| 41 |       |       |
| 42 | 33104 | 0.058 |
| 43 |       |       |
| 44 | 33111 | 0.045 |
| 45 |       |       |
| 46 | 33113 | 0.05  |
| 47 |       |       |
| 48 | 33133 | 4.409 |
| 49 |       |       |
| 50 | 33180 | 0.813 |
| 51 |       |       |
| 52 | 33260 | 0.057 |
| 53 |       |       |
| 54 | 33318 | 0.05  |
| 55 |       |       |
| 56 | 33321 | 0.05  |
| 57 |       |       |
| 58 | 33340 | 0.877 |
| 59 |       |       |
| 60 | 33357 | 0.057 |
|    |       |       |
|    | 33386 | 0.877 |
|    |       |       |
|    | 33457 | 0.057 |
|    |       |       |
|    | 33475 | 1.7   |
|    |       |       |
|    | 33559 | 0.057 |
|    |       |       |
|    | 33568 | 0.813 |
|    |       |       |
|    | 33589 | 0.048 |
|    |       |       |
|    | 33614 | 0.058 |
|    |       |       |
|    | 33624 | 0.037 |
|    |       |       |
|    | 33643 | 0.058 |
|    |       |       |
|    | 33645 | 0.207 |
|    |       |       |
|    | 33647 | 0.877 |
|    |       |       |
|    | 33653 | 0.058 |
|    |       |       |
|    | 33654 | 0.044 |
|    |       |       |
|    | 33666 | 0.058 |
|    |       |       |
|    | 33669 | 0.057 |

1  
2  
3  
4  
5  
6  
7  
8  
9  
10  
11  
12  
13  
14  
15  
16  
17  
18  
19  
20  
21  
22  
23  
24  
25  
26  
27  
28  
29  
30  
31  
32  
33  
34  
35  
36  
37  
38  
39  
40  
41  
42  
43  
44  
45  
46  
47  
48  
49  
50  
51  
52  
53  
54  
55  
56  
57  
58  
59  
60

|       |       |
|-------|-------|
| 33679 | 0.058 |
| 33687 | 0.877 |
| 33688 | 0.051 |
| 33704 | 0.936 |
| 33710 | 0.058 |
| 33743 | 0.107 |
| 33781 | 4.409 |
| 33785 | 0.057 |
| 33801 | 0.023 |
| 33826 | 0.058 |
| 33832 | 0.013 |
| 33838 | 0.877 |
| 33935 | 0.048 |
| 33961 | 0.051 |
| 33994 | 0.076 |
| 33995 | 0.877 |
| 34008 | 0.044 |
| 34022 | 0.877 |
| 34065 | 0.406 |
| 34073 | 0.633 |
| 34090 | 0.057 |
| 34091 | 0.076 |
| 34107 | 0.037 |
| 34129 | 0.036 |
| 34143 | 0.453 |
| 34152 | 0.057 |
| 34164 | 0.058 |
| 34172 | 0.057 |
| 34176 | 0.057 |
| 34182 | 0.037 |
| 34190 | 0.076 |
| 34197 | 0.036 |
| 34199 | 1.761 |
| 34209 | 0.058 |
| 34212 | 0.207 |
| 34218 | 0.076 |
| 34224 | 0.035 |
| 34229 | 0.058 |
| 34235 | 0.029 |
| 34251 | 0.032 |
| 34257 | 0.058 |
| 34260 | 0.29  |
| 34264 | 0.051 |
| 34266 | 0.029 |
| 34271 | 0.311 |

|    |       |       |
|----|-------|-------|
| 1  |       |       |
| 2  |       |       |
| 3  |       |       |
| 4  | 34274 | 0.037 |
| 5  | 34281 | 0.541 |
| 6  | 34289 | 0.045 |
| 7  | 34290 | 0.045 |
| 8  | 34305 | 0.058 |
| 9  | 34319 | 0.877 |
| 10 | 34348 | 0.038 |
| 11 | 34349 | 0.877 |
| 12 | 34350 | 0.058 |
| 13 | 34354 | 0.057 |
| 14 | 34359 | 0.048 |
| 15 | 34362 | 0.076 |
| 16 | 34373 | 0.057 |
| 17 | 34383 | 0.051 |
| 18 | 34396 | 0.058 |
| 19 | 34397 | 0.877 |
| 20 | 34401 | 0.032 |
| 21 | 34409 | 0.058 |
| 22 | 34422 | 0.046 |
| 23 | 34425 | 0.048 |
| 24 | 34437 | 0.057 |
| 25 | 34438 | 0.023 |
| 26 | 34440 | 0.044 |
| 27 | 34444 | 0.038 |
| 28 | 34447 | 0.057 |
| 29 | 34468 | 0.877 |
| 30 | 34474 | 0.036 |
| 31 | 34477 | 0.633 |
| 32 | 34487 | 0.057 |
| 33 | 34489 | 7.562 |
| 34 | 34495 | 0.058 |
| 35 | 34497 | 0.058 |
| 36 | 34500 | 0.058 |
| 37 | 34503 | 0.036 |
| 38 | 34506 | 0.042 |
| 39 | 34518 | 0.058 |
| 40 | 34521 | 0.046 |
| 41 | 34527 | 0.057 |
| 42 | 34536 | 0.048 |
| 43 | 34546 | 0.877 |
| 44 | 34550 | 0.048 |
| 45 | 34552 | 0.051 |
| 46 | 34554 | 0.877 |
| 47 | 34570 | 0.046 |
| 48 | 34579 | 0.044 |
| 49 |       |       |
| 50 |       |       |
| 51 |       |       |
| 52 |       |       |
| 53 |       |       |
| 54 |       |       |
| 55 |       |       |
| 56 |       |       |
| 57 |       |       |
| 58 |       |       |
| 59 |       |       |
| 60 |       |       |

1  
2  
3  
4  
5  
6  
7  
8  
9  
10  
11  
12  
13  
14  
15  
16  
17  
18  
19  
20  
21  
22  
23  
24  
25  
26  
27  
28  
29  
30  
31  
32  
33  
34  
35  
36  
37  
38  
39  
40  
41  
42  
43  
44  
45  
46  
47  
48  
49  
50  
51  
52  
53  
54  
55  
56  
57  
58  
59  
60

|       |       |
|-------|-------|
| 34595 | 0.064 |
| 34597 | 0.877 |
| 34606 | 0.042 |
| 34610 | 0.098 |
| 34616 | 0.052 |
| 34621 | 0.057 |
| 34634 | 0.037 |
| 34639 | 0.046 |
| 34662 | 0.044 |
| 34663 | 0.936 |
| 34667 | 0.051 |
| 34669 | 0.058 |
| 34670 | 0.045 |
| 34678 | 0.877 |
| 34700 | 0.877 |
| 34716 | 0.072 |
| 34718 | 0.029 |
| 34725 | 0.103 |
| 34729 | 0.048 |
| 34730 | 0.044 |
| 34731 | 0.032 |
| 34737 | 0.041 |
| 34738 | 0.045 |
| 34743 | 0.098 |
| 34744 | 0.311 |
| 34757 | 0.048 |
| 34761 | 0.877 |
| 34769 | 0.098 |
| 34771 | 4.409 |
| 34782 | 0.036 |
| 34784 | 0.058 |
| 34786 | 7.562 |
| 34787 | 7.562 |
| 34789 | 0.051 |
| 34793 | 0.023 |
| 34808 | 0.046 |
| 34815 | 0.058 |
| 34840 | 0.051 |
| 34845 | 0.051 |
| 34850 | 0.098 |
| 34858 | 0.058 |
| 34861 | 0.029 |
| 34865 | 0.058 |
| 34889 | 0.048 |
| 34898 | 0.023 |

|    |       |       |
|----|-------|-------|
| 1  |       |       |
| 2  |       |       |
| 3  |       |       |
| 4  | 34910 | 0.064 |
| 5  | 34911 | 0.057 |
| 6  | 34916 | 0.032 |
| 7  | 34920 | 0.041 |
| 8  | 34922 | 0.098 |
| 9  | 34923 | 0.045 |
| 10 | 34924 | 0.023 |
| 11 | 34931 | 0.057 |
| 12 | 34939 | 0.041 |
| 13 | 34946 | 0.104 |
| 14 | 34954 | 0.058 |
| 15 | 34961 | 0.098 |
| 16 | 34968 | 0.058 |
| 17 | 34977 | 0.098 |
| 18 | 34980 | 0.057 |
| 19 | 35038 | 3.025 |
| 20 | 35085 | 3.025 |
| 21 | 35093 | 4.409 |
| 22 | 35169 | 0.886 |
| 23 | 35170 | 0.378 |
| 24 | 35255 | 4.409 |
| 25 | 35265 | 0.016 |
| 26 | 35269 | 0.492 |
| 27 | 35292 | 0.057 |
| 28 | 35330 | 0.493 |
| 29 | 35341 | 3.025 |
| 30 | 35347 | 0.29  |
| 31 | 35438 | 0.29  |
| 32 | 35506 | 1.128 |
| 33 | 35562 | 6.291 |
| 34 | 35651 | 0.541 |
| 35 | 35653 | 0.517 |
| 36 | 35656 | 0.29  |
| 37 | 35679 | 0.058 |
| 38 | 35681 | 0.378 |
| 39 | 35682 | 0.886 |
| 40 | 35711 | 0.076 |
| 41 | 35749 | 0.061 |
| 42 | 35792 | 0.057 |
| 43 | 35800 | 0.877 |
| 44 | 35806 | 0.29  |
| 45 | 35853 | 0.493 |
| 46 | 35890 | 0.057 |
| 47 | 35893 | 0.311 |
| 48 | 35935 | 0.035 |
| 49 |       |       |
| 50 |       |       |
| 51 |       |       |
| 52 |       |       |
| 53 |       |       |
| 54 |       |       |
| 55 |       |       |
| 56 |       |       |
| 57 |       |       |
| 58 |       |       |
| 59 |       |       |
| 60 |       |       |

1  
2  
3  
4  
5  
6  
7  
8  
9  
10  
11  
12  
13  
14  
15  
16  
17  
18  
19  
20  
21  
22  
23  
24  
25  
26  
27  
28  
29  
30  
31  
32  
33  
34  
35  
36  
37  
38  
39  
40  
41  
42  
43  
44  
45  
46  
47  
48  
49  
50  
51  
52  
53  
54  
55  
56  
57  
58  
59  
60

|       |        |
|-------|--------|
| 35939 | 4.409  |
| 35965 | 0.058  |
| 35967 | 0.877  |
| 35968 | 3.598  |
| 36019 | 0.041  |
| 36035 | 0.792  |
| 36038 | 4.409  |
| 36040 | 11.573 |
| 36152 | 0.877  |
| 36211 | 6.731  |
| 36260 | 0.023  |
| 36329 | 0.061  |
| 36436 | 1.128  |
| 36472 | 0.862  |
| 36486 | 0.311  |
| 36488 | 0.051  |
| 36577 | 0.05   |
| 36597 | 0.057  |
| 36606 | 0.048  |
| 36608 | 0.051  |
| 36650 | 0.057  |
| 36697 | 0.541  |
| 36732 | 0.046  |
| 36754 | 0.058  |
| 36787 | 0.048  |
| 36873 | 0.046  |
| 36929 | 0.877  |
| 36945 | 0.877  |
| 36949 | 0.046  |
| 36993 | 0.051  |
| 36994 | 0.057  |
| 37002 | 0.057  |
| 37020 | 0.406  |
| 37021 | 0.541  |
| 37053 | 0.057  |
| 37094 | 0.057  |
| 37253 | 0.048  |
| 37291 | 0.041  |
| 37411 | 0.877  |
| 37507 | 1.128  |
| 37518 | 1.128  |
| 37553 | 0.048  |
| 37562 | 0.5    |
| 37587 | 0.5    |
| 37648 | 0.048  |

|       |        |
|-------|--------|
| 37688 | 0.603  |
| 37703 | 0.71   |
| 37719 | 11.573 |
| 37731 | 0.057  |
| 37750 | 0.307  |
| 37763 | 0.945  |
| 37779 | 3.598  |
| 37801 | 1.15   |
| 37816 | 0.057  |
| 37831 | 0.29   |
| 37850 | 0.061  |
| 37867 | 0.29   |
| 37904 | 0.058  |
| 37923 | 6.731  |
| 37928 | 2.518  |
| 37954 | 2.518  |
| 37960 | 6.731  |
| 37968 | 6.152  |
| 37972 | 0.061  |
| 37979 | 0.118  |
| 38013 | 0.962  |
| 38031 | 3.598  |
| 38032 | 0.058  |
| 38085 | 0.057  |
| 38088 | 0.057  |
| 38092 | 0.862  |
| 38103 | 0.962  |
| 38183 | 0.493  |
| 38196 | 0.541  |
| 38199 | 4.409  |
| 38293 | 1.15   |
| 38311 | 0.378  |
| 38323 | 0.877  |
| 38326 | 9.402  |
| 38332 | 0.057  |
| 38351 | 9.402  |
| 38363 | 0.057  |
| 38365 | 9.402  |
| 38430 | 0.041  |
| 38493 | 0.057  |
| 38511 | 0.045  |
| 38521 | 0.044  |
| 38527 | 0.061  |
| 38528 | 0.046  |
| 38553 | 11.573 |

1  
2  
3  
4  
5  
6  
7  
8  
9  
10  
11  
12  
13  
14  
15  
16  
17  
18  
19  
20  
21  
22  
23  
24  
25  
26  
27  
28  
29  
30  
31  
32  
33  
34  
35  
36  
37  
38  
39  
40  
41  
42  
43  
44  
45  
46  
47  
48  
49  
50  
51  
52  
53  
54  
55  
56  
57  
58  
59  
60

|       |        |
|-------|--------|
| 38770 | 0.517  |
| 38817 | 0.158  |
| 38827 | 0.032  |
| 38874 | 0.865  |
| 38881 | 0.207  |
| 38943 | 0.877  |
| 38944 | 9.402  |
| 38948 | 0.311  |
| 38950 | 0.058  |
| 38956 | 0.541  |
| 38970 | 0.115  |
| 38976 | 15.077 |
| 38984 | 0.058  |
| 38992 | 0.207  |
| 39019 | 0.138  |
| 39084 | 11.573 |
| 39085 | 0.045  |
| 39104 | 6.915  |
| 39109 | 0.307  |
| 39145 | 0.596  |
| 39180 | 6.731  |
| 39215 | 0.86   |
| 39240 | 1.51   |
| 39251 | 3.598  |
| 39264 | 0.311  |
| 39317 | 0.098  |
| 39333 | 0.058  |
| 39340 | 0.058  |
| 39354 | 0.016  |
| 39362 | 15.077 |
| 39363 | 1.51   |
| 39437 | 0.013  |
| 39461 | 0.057  |
| 39469 | 9.085  |
| 39475 | 0.229  |
| 39477 | 0.229  |
| 39478 | 0.945  |
| 39481 | 0.058  |
| 39498 | 0.945  |
| 39502 | 0.057  |
| 39505 | 0.29   |
| 39518 | 9.085  |
| 39558 | 0.044  |
| 39590 | 6.506  |
| 39629 | 0.877  |



|    |       |       |
|----|-------|-------|
| 1  |       |       |
| 2  |       |       |
| 3  |       |       |
| 4  | 39647 | 0.877 |
| 5  | 39656 | 0.877 |
| 6  | 39693 | 1.291 |
| 7  | 39708 | 0.603 |
| 8  | 39709 | 0.541 |
| 9  | 39722 | 0.158 |
| 10 | 39723 | 9.085 |
| 11 | 39746 | 9.085 |
| 12 | 39750 | 0.406 |
| 13 | 39756 | 6.506 |
| 14 | 39758 | 0.057 |
| 15 | 39798 | 0.29  |
| 16 | 39799 | 6.609 |
| 17 | 39811 | 0.541 |
| 18 | 39823 | 0.057 |
| 19 | 39842 | 0.197 |
| 20 | 39873 | 0.048 |
| 21 | 39876 | 0.603 |
| 22 | 39929 | 6.506 |
| 23 | 39934 | 0.058 |
| 24 | 39940 | 0.058 |
| 25 | 39987 | 7.04  |
| 26 | 40018 | 6.506 |
| 27 | 40058 | 0.29  |
| 28 | 40060 | 0.541 |
| 29 | 40061 | 0.406 |
| 30 | 40083 | 0.057 |
| 31 | 40086 | 0.057 |
| 32 | 40098 | 7.04  |
| 33 | 40107 | 0.058 |
| 34 | 40128 | 7.04  |
| 35 | 40141 | 0.433 |
| 36 | 40158 | 0.058 |
| 37 | 40159 | 0.107 |
| 38 | 40166 | 0.046 |
| 39 | 40185 | 0.813 |
| 40 | 40211 | 0.378 |
| 41 | 40212 | 0.886 |
| 42 | 40215 | 0.433 |
| 43 | 40239 | 0.962 |
| 44 | 40249 | 0.29  |
| 45 | 40253 | 0.098 |
| 46 | 40254 | 0.046 |
| 47 | 40336 | 0.135 |
| 48 | 40385 | 0.058 |
| 49 |       |       |
| 50 |       |       |
| 51 |       |       |
| 52 |       |       |
| 53 |       |       |
| 54 |       |       |
| 55 |       |       |
| 56 |       |       |
| 57 |       |       |
| 58 |       |       |
| 59 |       |       |
| 60 |       |       |

1  
2  
3  
4  
5  
6  
7  
8  
9  
10  
11  
12  
13  
14  
15  
16  
17  
18  
19  
20  
21  
22  
23  
24  
25  
26  
27  
28  
29  
30  
31  
32  
33  
34  
35  
36  
37  
38  
39  
40  
41  
42  
43  
44  
45  
46  
47  
48  
49  
50  
51  
52  
53  
54  
55  
56  
57  
58  
59  
60

|       |        |
|-------|--------|
| 40394 | 0.048  |
| 40396 | 0.037  |
| 40401 | 0.045  |
| 40422 | 0.041  |
| 40434 | 6.348  |
| 40473 | 0.492  |
| 40484 | 0.433  |
| 40508 | 6.348  |
| 40516 | 0.057  |
| 40563 | 0.192  |
| 40576 | 7.04   |
| 40616 | 1.928  |
| 40645 | 1.928  |
| 40662 | 0.058  |
| 40663 | 0.051  |
| 40664 | 0.488  |
| 40688 | 3.025  |
| 40718 | 0.046  |
| 40752 | 3.025  |
| 40756 | 0.076  |
| 40785 | 1.93   |
| 40805 | 0.406  |
| 40883 | 0.406  |
| 40926 | 0.406  |
| 40940 | 4.995  |
| 40957 | 6.609  |
| 40961 | 1.93   |
| 41135 | 74.044 |
| 41161 | 9.402  |
| 41214 | 0.057  |
| 41259 | 0.051  |
| 41275 | 0.058  |
| 41276 | 0.058  |
| 41278 | 0.041  |
| 41286 | 4.995  |
| 41348 | 6.348  |
| 41364 | 0.433  |
| 41365 | 0.813  |
| 41366 | 0.433  |
| 41367 | 0.813  |
| 41407 | 0.877  |
| 41409 | 0.058  |
| 41414 | 0.029  |
| 41416 | 0.128  |
| 41450 | 0.433  |

|    |       |        |
|----|-------|--------|
| 1  |       |        |
| 2  |       |        |
| 3  | 41513 | 0.057  |
| 4  | 41521 | 0.061  |
| 5  |       |        |
| 6  | 41523 | 0.057  |
| 7  | 41524 | 0.064  |
| 8  |       |        |
| 9  | 41535 | 0.051  |
| 10 | 41550 | 0.71   |
| 11 | 41599 | 0.038  |
| 12 |       |        |
| 13 | 41608 | 0.013  |
| 14 | 41615 | 0.05   |
| 15 | 41621 | 0.307  |
| 16 |       |        |
| 17 | 41622 | 0.121  |
| 18 | 41623 | 0.307  |
| 19 | 41624 | 0.121  |
| 20 | 41668 | 0.166  |
| 21 |       |        |
| 22 | 41673 | 0.046  |
| 23 | 41674 | 0.166  |
| 24 |       |        |
| 25 | 41677 | 0.023  |
| 26 | 41680 | 0.029  |
| 27 | 41682 | 0.051  |
| 28 | 41701 | 0.098  |
| 29 |       |        |
| 30 | 41720 | 0.013  |
| 31 | 41722 | 7.562  |
| 32 | 41729 | 0.036  |
| 33 |       |        |
| 34 | 41817 | 0.076  |
| 35 | 41823 | 0.076  |
| 36 | 41974 | 4.409  |
| 37 |       |        |
| 38 | 41976 | 0.29   |
| 39 | 42003 | 0.076  |
| 40 |       |        |
| 41 | 42021 | 11.573 |
| 42 | 42074 | 0.396  |
| 43 | 42078 | 0.036  |
| 44 | 42094 | 0.862  |
| 45 | 42101 | 1.236  |
| 46 | 42108 | 0.057  |
| 47 |       |        |
| 48 | 42125 | 0.029  |
| 49 |       |        |
| 50 | 42201 | 0.058  |
| 51 | 42208 | 0.044  |
| 52 |       |        |
| 53 | 42213 | 0.058  |
| 54 | 42218 | 0.057  |
| 55 | 42280 | 0.155  |
| 56 |       |        |
| 57 | 42332 | 0.155  |
| 58 | 42345 | 0.877  |
| 59 | 42371 | 1.343  |
| 60 | 42380 | 0.046  |
|    | 42394 | 0.036  |

1  
2  
3  
4  
5  
6  
7  
8  
9  
10  
11  
12  
13  
14  
15  
16  
17  
18  
19  
20  
21  
22  
23  
24  
25  
26  
27  
28  
29  
30  
31  
32  
33  
34  
35  
36  
37  
38  
39  
40  
41  
42  
43  
44  
45  
46  
47  
48  
49  
50  
51  
52  
53  
54  
55  
56  
57  
58  
59  
60

|       |       |
|-------|-------|
| 42397 | 0.057 |
| 42399 | 6.609 |
| 42406 | 0.057 |
| 42455 | 0.311 |
| 42500 | 0.433 |
| 42514 | 0.877 |
| 42538 | 6.348 |
| 42576 | 9.402 |
| 42590 | 9.402 |
| 42591 | 3.598 |
| 42604 | 0.577 |
| 42706 | 0.058 |
| 42708 | 0.458 |
| 42791 | 0.051 |
| 42792 | 0.057 |
| 42793 | 0.311 |
| 42798 | 0.406 |
| 42821 | 0.153 |
| 42834 | 1.343 |
| 42905 | 0.207 |
| 42913 | 7.562 |
| 42915 | 0.877 |
| 43028 | 0.877 |
| 43032 | 0.057 |
| 43045 | 0.057 |
| 43089 | 9.085 |
| 43096 | 0.061 |
| 43152 | 6.731 |
| 43198 | 0.046 |
| 43199 | 0.877 |
| 43233 | 0.058 |
| 43238 | 0.051 |
| 43244 | 0.051 |
| 43252 | 0.058 |
| 43260 | 0.914 |
| 43315 | 0.939 |
| 43414 | 0.058 |
| 43426 | 0.061 |
| 43441 | 0.041 |
| 43447 | 0.877 |
| 43456 | 0.048 |
| 43479 | 0.058 |
| 43504 | 0.057 |
| 43513 | 0.046 |
| 43536 | 0.877 |

|    |       |       |
|----|-------|-------|
| 1  | 43541 | 0.121 |
| 2  | 43550 | 0.038 |
| 3  | 43554 | 0.877 |
| 4  | 43616 | 0.539 |
| 5  | 43617 | 6.506 |
| 6  | 43652 | 0.586 |
| 7  | 43657 | 1.276 |
| 8  | 43766 | 0.057 |
| 9  | 43812 | 0.493 |
| 10 | 43891 | 0.877 |
| 11 | 43904 | 0.057 |
| 12 | 43911 | 0.098 |
| 13 | 44022 | 0.386 |
| 14 | 44112 | 0.158 |
| 15 | 44159 | 0.058 |
| 16 | 44187 | 0.104 |
| 17 | 44210 | 0.058 |
| 18 | 44232 | 210   |
| 19 | 44233 | 0.016 |
| 20 | 44258 | 0.877 |
| 21 | 44261 | 0.386 |
| 22 | 44313 | 0.061 |
| 23 | 44371 | 0.406 |
| 24 | 44483 | 0.048 |
| 25 | 44487 | 2.518 |
| 26 | 44703 | 0.121 |
| 27 | 44730 | 0.061 |
| 28 | 44800 | 0.098 |
| 29 | 44837 | 6.731 |
| 30 | 44867 | 0.862 |
| 31 | 44924 | 0.051 |
| 32 | 44986 | 0.098 |
| 33 | 45092 | 6.506 |
| 34 | 45145 | 0.061 |
| 35 | 45213 | 1.225 |
| 36 | 45216 | 0.048 |
| 37 | 45231 | 0.877 |
| 38 | 45233 | 0.032 |
| 39 | 45242 | 0.032 |
| 40 | 45256 | 0.061 |
| 41 | 45259 | 0.058 |
| 42 | 45262 | 0.453 |
| 43 | 45276 | 0.877 |
| 44 | 45298 | 0.058 |
| 45 | 45320 | 0.057 |

1  
2  
3  
4  
5  
6  
7  
8  
9  
10  
11  
12  
13  
14  
15  
16  
17  
18  
19  
20  
21  
22  
23  
24  
25  
26  
27  
28  
29  
30  
31  
32  
33  
34  
35  
36  
37  
38  
39  
40  
41  
42  
43  
44  
45  
46  
47  
48  
49  
50  
51  
52  
53  
54  
55  
56  
57  
58  
59  
60

|       |        |
|-------|--------|
| 45325 | 0.458  |
| 45331 | 0.057  |
| 45348 | 0.029  |
| 45349 | 2.107  |
| 45439 | 9.085  |
| 45460 | 11.573 |
| 45549 | 3.598  |
| 45598 | 74.044 |
| 45645 | 0.029  |
| 45649 | 0.029  |
| 45736 | 0.371  |
| 45745 | 1.361  |
| 45766 | 2.723  |
| 45788 | 0.681  |
| 45790 | 0.681  |
| 45800 | 1.779  |
| 45811 | 0.445  |
| 45814 | 0.158  |
| 45827 | 1.361  |
| 45830 | 5.447  |
| 45842 | 0.098  |
| 45894 | 9.085  |
| 45929 | 2.723  |
| 45936 | 0.445  |
| 45982 | 0.445  |
| 46018 | 0.89   |
| 46019 | 1.334  |
| 46020 | 0.89   |
| 46021 | 0.445  |
| 46022 | 0.667  |
| 46141 | 0.057  |
| 46159 | 1.334  |
| 46187 | 5.447  |
| 46279 | 0.541  |
| 46342 | 0.016  |
| 46354 | 7.04   |
| 46440 | 0.098  |
| 46461 | 0.667  |
| 46511 | 0.058  |
| 46544 | 0.058  |
| 46555 | 6.609  |
| 46559 | 2.518  |
| 46560 | 6.731  |
| 46578 | 1.128  |
| 46587 | 0.29   |

|    |       |        |
|----|-------|--------|
| 1  |       |        |
| 2  |       |        |
| 3  | 46633 | 0.058  |
| 4  | 46638 | 0.057  |
| 5  |       |        |
| 6  | 46643 | 0.406  |
| 7  | 46657 | 9.402  |
| 8  |       |        |
| 9  | 46658 | 11.573 |
| 10 | 46659 | 1.779  |
| 11 | 46729 | 0.058  |
| 12 |       |        |
| 13 | 46733 | 3.598  |
| 14 | 46763 | 0.877  |
| 15 | 46801 | 0.035  |
| 16 | 46818 | 0.035  |
| 17 | 46844 | 0.207  |
| 18 | 46846 | 0.058  |
| 19 | 46848 | 0.098  |
| 20 | 46860 | 0.057  |
| 21 | 46898 | 0.058  |
| 22 | 46904 | 0.058  |
| 23 | 46906 | 0.058  |
| 24 | 46919 | 0.813  |
| 25 | 46920 | 0.813  |
| 26 | 46921 | 0.048  |
| 27 | 46925 | 0.057  |
| 28 | 46940 | 0.433  |
| 29 | 46942 | 0.098  |
| 30 | 46967 | 0.023  |
| 31 | 46968 | 0.023  |
| 32 | 46970 | 0.037  |
| 33 | 46987 | 0.038  |
| 34 | 47003 | 0.128  |
| 35 | 47071 | 0.041  |
| 36 | 47072 | 45.472 |
| 37 | 47081 | 0.057  |
| 38 | 47116 | 0.058  |
| 39 | 47154 | 1.276  |
| 40 | 47200 | 0.877  |
| 41 | 47211 | 0.058  |
| 42 | 47350 | 0.603  |
| 43 | 47399 | 2.224  |
| 44 | 47401 | 0.061  |
| 45 | 47413 | 9.402  |
| 46 | 47460 | 2.224  |
| 47 | 47501 | 0.207  |
| 48 | 47508 | 0.058  |
| 49 | 47555 | 4.409  |
| 50 | 47579 | 0.042  |
| 51 |       |        |
| 52 |       |        |
| 53 |       |        |
| 54 |       |        |
| 55 |       |        |
| 56 |       |        |
| 57 |       |        |
| 58 |       |        |
| 59 |       |        |
| 60 |       |        |

1  
2  
3  
4  
5  
6  
7  
8  
9  
10  
11  
12  
13  
14  
15  
16  
17  
18  
19  
20  
21  
22  
23  
24  
25  
26  
27  
28  
29  
30  
31  
32  
33  
34  
35  
36  
37  
38  
39  
40  
41  
42  
43  
44  
45  
46  
47  
48  
49  
50  
51  
52  
53  
54  
55  
56  
57  
58  
59  
60

|       |       |
|-------|-------|
| 47671 | 7.562 |
| 47672 | 7.562 |
| 47706 | 0.013 |
| 47753 | 0.787 |
| 47759 | 7.04  |
| 47816 | 0.577 |
| 47820 | 0.076 |
| 47834 | 0.058 |
| 47847 | 0.051 |
| 47854 | 0.046 |
| 47867 | 1.301 |
| 47919 | 0.038 |
| 47949 | 1.041 |
| 47952 | 0.051 |
| 47985 | 0.046 |
| 47994 | 0.045 |
| 48004 | 0.051 |
| 48035 | 0.072 |
| 48059 | 0.057 |
| 48060 | 0.072 |
| 48062 | 0.057 |
| 48064 | 6.291 |
| 48065 | 0.035 |
| 48066 | 0.057 |
| 48071 | 0.052 |
| 48084 | 0.936 |
| 48090 | 0.541 |
| 48128 | 0.71  |
| 48129 | 0.877 |
| 48133 | 0.044 |
| 48136 | 0.038 |
| 48138 | 0.057 |
| 48148 | 0.71  |
| 48153 | 0.128 |
| 48157 | 0.877 |
| 48158 | 7.562 |
| 48161 | 0.098 |
| 48178 | 0.058 |
| 48183 | 0.493 |
| 48216 | 0.95  |
| 48218 | 0.311 |
| 48253 | 1.15  |
| 48259 | 7.562 |
| 48295 | 0.877 |
| 48301 | 0.877 |



|    |       |       |
|----|-------|-------|
| 1  | 48311 | 0.051 |
| 2  |       |       |
| 3  | 48326 | 0.936 |
| 4  |       |       |
| 5  | 48330 | 0.877 |
| 6  |       |       |
| 7  | 48354 | 0.877 |
| 8  |       |       |
| 9  | 48413 | 7.562 |
| 10 | 48434 | 7.562 |
| 11 | 48444 | 0.877 |
| 12 |       |       |
| 13 | 48483 | 7.562 |
| 14 | 48526 | 1.343 |
| 15 | 48535 | 0.058 |
| 16 | 48546 | 0.048 |
| 17 |       |       |
| 18 | 48561 | 0.877 |
| 19 | 48562 | 0.936 |
| 20 | 48568 | 0.057 |
| 21 |       |       |
| 22 | 48571 | 6.731 |
| 23 | 48597 | 0.058 |
| 24 |       |       |
| 25 | 48604 | 4.409 |
| 26 | 48622 | 0.877 |
| 27 | 48644 | 0.048 |
| 28 |       |       |
| 29 | 48675 | 0.061 |
| 30 | 48738 | 0.936 |
| 31 | 48775 | 0.051 |
| 32 | 48810 | 0.023 |
| 33 |       |       |
| 34 | 48816 | 0.877 |
| 35 | 48871 | 0.076 |
| 36 | 48880 | 7.562 |
| 37 |       |       |
| 38 | 48913 | 7.562 |
| 39 | 48964 | 0.057 |
| 40 |       |       |
| 41 | 49059 | 0.057 |
| 42 | 49096 | 0.058 |
| 43 | 49105 | 0.058 |
| 44 | 49132 | 0.603 |
| 45 | 49133 | 0.936 |
| 46 |       |       |
| 47 | 49219 | 0.877 |
| 48 | 49266 | 0.936 |
| 49 |       |       |
| 50 | 49277 | 0.057 |
| 51 | 49314 | 0.877 |
| 52 | 49323 | 0.406 |
| 53 | 49324 | 0.29  |
| 54 |       |       |
| 55 | 49395 | 8.77  |
| 56 | 49417 | 0.058 |
| 57 | 49432 | 0.936 |
| 58 |       |       |
| 59 | 49524 | 0.877 |
| 60 | 49575 | 0.058 |
|    | 49742 | 0.229 |

1  
2  
3  
4  
5  
6  
7  
8  
9  
10  
11  
12  
13  
14  
15  
16  
17  
18  
19  
20  
21  
22  
23  
24  
25  
26  
27  
28  
29  
30  
31  
32  
33  
34  
35  
36  
37  
38  
39  
40  
41  
42  
43  
44  
45  
46  
47  
48  
49  
50  
51  
52  
53  
54  
55  
56  
57  
58  
59  
60

|       |       |
|-------|-------|
| 49787 | 0.945 |
| 49788 | 0.603 |
| 49791 | 3.025 |
| 49849 | 0.058 |
| 49862 | 0.603 |
| 49940 | 0.229 |
| 49976 | 4.409 |
| 50058 | 0.057 |
| 50059 | 0.359 |
| 50095 | 0.229 |
| 50117 | 0.936 |
| 50166 | 0.877 |
| 50232 | 0.877 |
| 50266 | 0.057 |
| 50269 | 0.207 |
| 50314 | 0.098 |
| 50317 | 0.207 |
| 50343 | 0.052 |
| 50363 | 0.936 |
| 50380 | 0.378 |
| 50421 | 0.038 |
| 50428 | 5.06  |
| 50468 | 0.038 |
| 50482 | 0.058 |
| 50504 | 0.058 |
| 50513 | 4.409 |
| 50532 | 0.044 |
| 50602 | 0.057 |
| 50628 | 0.048 |
| 50652 | 0.936 |
| 50659 | 0.128 |
| 50671 | 2.518 |
| 50726 | 3.025 |
| 50733 | 0.461 |
| 50785 | 0.057 |
| 50813 | 0.061 |
| 50862 | 0.541 |
| 50881 | 0.058 |
| 50929 | 2.518 |
| 50947 | 0.29  |
| 51084 | 0.051 |
| 51099 | 0.057 |
| 51118 | 0.072 |
| 51235 | 3.598 |
| 51237 | 0.603 |

|    |       |       |
|----|-------|-------|
| 1  | 51242 | 0.098 |
| 2  |       |       |
| 3  | 51284 | 0.718 |
| 4  |       |       |
| 5  | 51293 | 0.057 |
| 6  |       |       |
| 7  | 51327 | 0.051 |
| 8  |       |       |
| 9  | 51339 | 0.061 |
| 10 |       |       |
| 11 | 51343 | 0.076 |
| 12 |       |       |
| 13 | 51360 | 0.045 |
| 14 |       |       |
| 15 | 51381 | 0.058 |
| 16 |       |       |
| 17 | 51384 | 0.945 |
| 18 |       |       |
| 19 | 51595 | 0.877 |
| 20 |       |       |
| 21 | 51611 | 3.025 |
| 22 |       |       |
| 23 | 51614 | 0.057 |
| 24 |       |       |
| 25 | 51644 | 0.051 |
| 26 |       |       |
| 27 | 51769 | 0.936 |
| 28 |       |       |
| 29 | 51789 | 0.461 |
| 30 |       |       |
| 31 | 51808 | 0.424 |
| 32 |       |       |
| 33 | 51819 | 0.058 |
| 34 |       |       |
| 35 | 51827 | 0.064 |
| 36 |       |       |
| 37 | 51828 | 0.936 |
| 38 |       |       |
| 39 | 51829 | 0.045 |
| 40 |       |       |
| 41 | 51896 | 3.578 |
| 42 |       |       |
| 43 | 51923 | 0.061 |
| 44 |       |       |
| 45 | 51937 | 0.038 |
| 46 |       |       |
| 47 | 51943 | 0.936 |
| 48 |       |       |
| 49 | 52009 | 0.057 |
| 50 |       |       |
| 51 | 52085 | 0.051 |
| 52 |       |       |
| 53 | 52141 | 0.061 |
| 54 |       |       |
| 55 | 52154 | 0.057 |
| 56 |       |       |
| 57 | 52178 | 0.493 |
| 58 |       |       |
| 59 | 52216 | 0.229 |
| 60 |       |       |
|    | 52217 | 0.461 |
|    |       |       |
|    | 52220 | 1.93  |
|    |       |       |
|    | 52229 | 0.603 |
|    |       |       |
|    | 52338 | 0.057 |
|    |       |       |
|    | 52389 | 0.057 |
|    |       |       |
|    | 52400 | 0.71  |
|    |       |       |
|    | 52420 | 0.359 |
|    |       |       |
|    | 52455 | 0.877 |
|    |       |       |
|    | 52495 | 0.046 |
|    |       |       |
|    | 52509 | 6.291 |
|    |       |       |
|    | 52547 | 1.15  |
|    |       |       |
|    | 52592 | 0.461 |
|    |       |       |
|    | 52605 | 0.046 |
|    |       |       |
|    | 52617 | 0.936 |
|    |       |       |
|    | 52714 | 0.517 |

1  
2  
3  
4  
5  
6  
7  
8  
9  
10  
11  
12  
13  
14  
15  
16  
17  
18  
19  
20  
21  
22  
23  
24  
25  
26  
27  
28  
29  
30  
31  
32  
33  
34  
35  
36  
37  
38  
39  
40  
41  
42  
43  
44  
45  
46  
47  
48  
49  
50  
51  
52  
53  
54  
55  
56  
57  
58  
59  
60

|       |        |
|-------|--------|
| 52785 | 6.915  |
| 52809 | 0.461  |
| 52856 | 0.057  |
| 52867 | 0.032  |
| 52888 | 0.038  |
| 52889 | 0.057  |
| 52929 | 0.038  |
| 52931 | 0.098  |
| 52948 | 0.877  |
| 52956 | 0.603  |
| 52966 | 0.058  |
| 52977 | 0.29   |
| 53062 | 17.128 |
| 53079 | 0.041  |
| 53106 | 4.409  |
| 53113 | 0.461  |
| 53116 | 0.945  |
| 53164 | 0.076  |
| 53181 | 7.562  |
| 53208 | 0.877  |
| 53287 | 0.051  |
| 53296 | 0.072  |
| 53331 | 0.936  |
| 53345 | 0.057  |
| 53384 | 0.057  |
| 53397 | 0.936  |
| 53417 | 7.562  |
| 53576 | 0.861  |
| 53600 | 0.128  |
| 53604 | 0.057  |
| 53617 | 0.057  |
| 53626 | 0.098  |
| 53639 | 0.046  |
| 53679 | 0.051  |
| 53700 | 0.045  |
| 53702 | 0.051  |
| 53709 | 0.962  |
| 53784 | 0.357  |
| 53803 | 0.057  |
| 53918 | 4.409  |
| 53929 | 0.71   |
| 53952 | 0.058  |
| 53961 | 1.236  |
| 53980 | 0.045  |
| 53999 | 0.128  |

|    |       |        |
|----|-------|--------|
| 1  |       |        |
| 2  |       |        |
| 3  |       |        |
| 4  | 54017 | 0.633  |
| 5  | 54021 | 0.311  |
| 6  | 54023 | 0.046  |
| 7  | 54063 | 42.859 |
| 8  | 54075 | 0.057  |
| 9  | 54085 | 0.962  |
| 10 | 54137 | 0.048  |
| 11 | 54179 | 0.058  |
| 12 | 54304 | 0.098  |
| 13 | 54353 | 0.877  |
| 14 | 54354 | 0.044  |
| 15 | 54406 | 0.192  |
| 16 | 54463 | 0.057  |
| 17 | 54476 | 0.098  |
| 18 | 54484 | 6.291  |
| 19 | 54514 | 0.048  |
| 20 | 54518 | 0.057  |
| 21 | 54520 | 0.633  |
| 22 | 54660 | 0.424  |
| 23 | 54694 | 3.578  |
| 24 | 54713 | 0.058  |
| 25 | 54783 | 0.045  |
| 26 | 54790 | 0.962  |
| 27 | 54806 | 5.928  |
| 28 | 54853 | 0.877  |
| 29 | 54870 | 0.052  |
| 30 | 54877 | 0.036  |
| 31 | 54906 | 1.225  |
| 32 | 54979 | 6.731  |
| 33 | 55009 | 0.098  |
| 34 | 55044 | 0.051  |
| 35 | 55052 | 0.5    |
| 36 | 55099 | 0.311  |
| 37 | 55129 | 0.058  |
| 38 | 55139 | 0.036  |
| 39 | 55153 | 0.048  |
| 40 | 55206 | 0.262  |
| 41 | 55221 | 7.562  |
| 42 | 55233 | 0.048  |
| 43 | 55245 | 0.877  |
| 44 | 55309 | 0.038  |
| 45 | 55313 | 0.048  |
| 46 | 55418 | 0.058  |
| 47 | 55425 | 0.107  |
| 48 | 55434 | 0.048  |
| 49 |       |        |
| 50 |       |        |
| 51 |       |        |
| 52 |       |        |
| 53 |       |        |
| 54 |       |        |
| 55 |       |        |
| 56 |       |        |
| 57 |       |        |
| 58 |       |        |
| 59 |       |        |
| 60 |       |        |

1  
2  
3  
4  
5  
6  
7  
8  
9  
10  
11  
12  
13  
14  
15  
16  
17  
18  
19  
20  
21  
22  
23  
24  
25  
26  
27  
28  
29  
30  
31  
32  
33  
34  
35  
36  
37  
38  
39  
40  
41  
42  
43  
44  
45  
46  
47  
48  
49  
50  
51  
52  
53  
54  
55  
56  
57  
58  
59  
60

|       |        |
|-------|--------|
| 55454 | 0.098  |
| 55465 | 0.051  |
| 55486 | 0.098  |
| 55491 | 0.032  |
| 55505 | 0.045  |
| 55530 | 0.041  |
| 55535 | 0.072  |
| 55582 | 0.718  |
| 55624 | 0.072  |
| 55752 | 11.573 |
| 55817 | 0.877  |
| 55825 | 0.013  |
| 55832 | 4.409  |
| 55839 | 0.458  |
| 55852 | 0.458  |
| 55894 | 0.098  |
| 55913 | 0.057  |
| 55970 | 0.596  |
| 56006 | 0.058  |
| 56022 | 0.962  |
| 56039 | 0.098  |
| 56046 | 0.058  |
| 56071 | 0.603  |
| 56078 | 0.311  |
| 56106 | 0.453  |
| 56171 | 0.051  |
| 56178 | 2.37   |
| 56202 | 10.546 |
| 56205 | 0.058  |
| 56213 | 0.048  |
| 56266 | 0.051  |
| 56275 | 0.035  |
| 56282 | 0.603  |
| 56340 | 0.051  |
| 56441 | 0.936  |
| 56461 | 0.051  |
| 56491 | 0.541  |
| 56549 | 0.058  |
| 56554 | 0.453  |
| 56558 | 0.603  |
| 56559 | 0.051  |
| 56565 | 0.038  |
| 56566 | 0.058  |
| 56584 | 0.718  |
| 56651 | 0.052  |

|       |       |
|-------|-------|
| 56665 | 0.461 |
| 56670 | 3.598 |
| 56671 | 4.4   |
| 56688 | 6.291 |
| 56762 | 0.453 |
| 56788 | 0.633 |
| 56817 | 0.038 |
| 56898 | 0.207 |
| 56925 | 0.045 |
| 56945 | 0.058 |
| 57006 | 0.076 |
| 57007 | 0.023 |
| 57027 | 0.962 |
| 57033 | 0.461 |
| 57045 | 0.057 |
| 57052 | 0.945 |
| 57097 | 0.051 |
| 57107 | 0.032 |
| 57112 | 0.048 |
| 57120 | 0.042 |
| 57139 | 0.59  |
| 57162 | 0.057 |
| 57197 | 0.041 |
| 57297 | 0.064 |
| 57353 | 0.051 |
| 57370 | 0.045 |
| 57381 | 0.128 |
| 57433 | 0.058 |
| 57454 | 0.886 |
| 57465 | 0.058 |
| 57475 | 0.035 |
| 57487 | 0.051 |
| 57523 | 0.052 |
| 57527 | 0.072 |
| 57545 | 0.603 |
| 57623 | 4.409 |
| 57649 | 0.072 |
| 57650 | 0.058 |
| 57750 | 4.409 |
| 57752 | 0.057 |
| 57839 | 0.038 |
| 57865 | 0.051 |
| 57900 | 0.051 |
| 57929 | 0.058 |
| 57943 | 0.813 |

1  
2  
3  
4  
5  
6  
7  
8  
9  
10  
11  
12  
13  
14  
15  
16  
17  
18  
19  
20  
21  
22  
23  
24  
25  
26  
27  
28  
29  
30  
31  
32  
33  
34  
35  
36  
37  
38  
39  
40  
41  
42  
43  
44  
45  
46  
47  
48  
49  
50  
51  
52  
53  
54  
55  
56  
57  
58  
59  
60

|       |       |
|-------|-------|
| 57972 | 0.032 |
| 58039 | 1.928 |
| 58048 | 0.057 |
| 58071 | 0.057 |
| 58114 | 0.945 |
| 58129 | 0.29  |
| 58190 | 0.71  |
| 58213 | 0.098 |
| 58217 | 0.229 |
| 58221 | 0.045 |
| 58248 | 6.291 |
| 58273 | 0.378 |
| 58279 | 0.235 |
| 58288 | 0.051 |
| 58290 | 0.046 |
| 58298 | 0.052 |
| 58316 | 0.046 |
| 58382 | 0.042 |
| 58383 | 0.05  |
| 58415 | 0.057 |
| 58472 | 0.357 |
| 58493 | 0.945 |
| 58499 | 4.315 |
| 58501 | 0.051 |
| 58523 | 0.05  |
| 58526 | 0.058 |
| 58572 | 0.076 |
| 58582 | 0.058 |
| 58636 | 0.058 |
| 58652 | 0.098 |
| 58708 | 0.098 |
| 58710 | 15    |
| 58737 | 0.962 |
| 58743 | 0.058 |
| 58766 | 7.888 |
| 58842 | 0.207 |
| 58848 | 0.058 |
| 58853 | 0.461 |
| 58855 | 0.051 |
| 58888 | 0.061 |
| 58960 | 0.042 |
| 59057 | 7.04  |
| 59067 | 0.057 |
| 59131 | 0.058 |
| 59147 | 0.104 |



|       |       |
|-------|-------|
| 59161 | 0.032 |
| 59203 | 0.936 |
| 59246 | 0.098 |
| 59289 | 0.311 |
| 59392 | 7.9   |
| 59442 | 0.051 |
| 59473 | 5.928 |
| 59479 | 0.051 |
| 59490 | 3.092 |
| 59553 | 0.057 |
| 59562 | 0.098 |
| 59584 | 0.633 |
| 59595 | 0.057 |
| 59599 | 0.058 |
| 59618 | 3.95  |
| 59678 | 0.493 |
| 59705 | 0.058 |
| 59820 | 0.032 |
| 59865 | 0.461 |
| 59878 | 0.045 |
| 59880 | 0.207 |
| 59970 | 0.378 |
| 59978 | 0.044 |
| 59986 | 0.051 |
| 59989 | 0.044 |
| 60035 | 0.057 |
| 60053 | 0.101 |

Source: BNF unit costs (2013 UK pounds). Available online: [http://www.bnf.org/bnf/org\\_450080.htm](http://www.bnf.org/bnf/org_450080.htm).

Note(1): Product code descriptions available from <https://www.cprd.com/ObservationalData/CodedData.asp#DrugsinPrimarycare>.

STROBE Statement—Checklist of items that should be included in reports of *cohort studies*

|                              | Item No | Recommendation                                                                                                                                                                                                                                                                                                                                                                                                                                                                                                 |
|------------------------------|---------|----------------------------------------------------------------------------------------------------------------------------------------------------------------------------------------------------------------------------------------------------------------------------------------------------------------------------------------------------------------------------------------------------------------------------------------------------------------------------------------------------------------|
| <b>Title and abstract</b>    | 1       | (a) Indicate the study's design with a commonly used term in the title or the abstract <b>[See the title, page 1, and 'design' section of the abstract, page 2]</b><br>(b) Provide in the abstract an informative and balanced summary of what was done and what was found <b>[See 'primary and secondary outcome measures' and 'results' sections of abstract, page 2]</b>                                                                                                                                    |
| <b>Introduction</b>          |         |                                                                                                                                                                                                                                                                                                                                                                                                                                                                                                                |
| Background/rationale         | 2       | Explain the scientific background and rationale for the investigation being reported <b>[See 'introduction' section, page 4]</b>                                                                                                                                                                                                                                                                                                                                                                               |
| Objectives                   | 3       | State specific objectives, including any prespecified hypotheses <b>[See final paragraph of 'introduction' section, page 4]</b>                                                                                                                                                                                                                                                                                                                                                                                |
| <b>Methods</b>               |         |                                                                                                                                                                                                                                                                                                                                                                                                                                                                                                                |
| Study design                 | 4       | Present key elements of study design early in the paper <b>[pages 4-7]</b>                                                                                                                                                                                                                                                                                                                                                                                                                                     |
| Setting                      | 5       | Describe the setting, locations, and relevant dates, including periods of recruitment, exposure, follow-up, and data collection <b>[pages 4-5]</b>                                                                                                                                                                                                                                                                                                                                                             |
| Participants                 | 6       | (a) Give the eligibility criteria, and the sources and methods of selection of participants. Describe methods of follow-up <b>[pages 4-6]</b><br>(b) For matched studies, give matching criteria and number of exposed and unexposed <b>[pages 7-8]</b>                                                                                                                                                                                                                                                        |
| Variables                    | 7       | Clearly define all outcomes, exposures, predictors, potential confounders, and effect modifiers. Give diagnostic criteria, if applicable <b>[pages 5-7]</b>                                                                                                                                                                                                                                                                                                                                                    |
| Data sources/<br>measurement | 8*      | For each variable of interest, give sources of data and details of methods of assessment (measurement). Describe comparability of assessment methods if there is more than one group <b>[pages 6-7]</b>                                                                                                                                                                                                                                                                                                        |
| Bias                         | 9       | Describe any efforts to address potential sources of bias <b>[See pages 7-8 with more information included in the 'study limitations' section, page 14]</b>                                                                                                                                                                                                                                                                                                                                                    |
| Study size                   | 10      | Explain how the study size was arrived at <b>[See pages 5-6 and 'rates of lumbar surgery in HES' and 'percentage of lumbar surgery patients with persistent postoperative pain (cases)' under 'results', pages 8-9]</b>                                                                                                                                                                                                                                                                                        |
| Quantitative variables       | 11      | Explain how quantitative variables were handled in the analyses. If applicable, describe which groupings were chosen and why <b>[pages 7-8]</b>                                                                                                                                                                                                                                                                                                                                                                |
| Statistical methods          | 12      | (a) Describe all statistical methods, including those used to control for confounding <b>[page 7-8]</b><br>(b) Describe any methods used to examine subgroups and interactions <b>[n/a]</b><br>(c) Explain how missing data were addressed <b>[n/a]</b><br>(d) If applicable, explain how loss to follow-up was addressed <b>[n/a, the study inclusion criteria stipulated that all patients were required to have 2 years follow up in the data]</b><br>(e) Describe any sensitivity analyses <b>[page 8]</b> |
| <b>Results</b>               |         |                                                                                                                                                                                                                                                                                                                                                                                                                                                                                                                |
| Participants                 | 13*     | (a) Report numbers of individuals at each stage of study—eg numbers potentially eligible, examined for eligibility, confirmed eligible, included in the study, completing follow-up, and analysed <b>[pages 8-9]</b><br>(b) Give reasons for non-participation at each stage <b>[n/a]</b><br>(c) Consider use of a flow diagram <b>[n/a]</b>                                                                                                                                                                   |
| Descriptive data             | 14*     | (a) Give characteristics of study participants (eg demographic, clinical, social) and                                                                                                                                                                                                                                                                                                                                                                                                                          |

|                          |     |                                                                                                                                                                                                                                                                                                                                                                                                                                                                                                                               |
|--------------------------|-----|-------------------------------------------------------------------------------------------------------------------------------------------------------------------------------------------------------------------------------------------------------------------------------------------------------------------------------------------------------------------------------------------------------------------------------------------------------------------------------------------------------------------------------|
|                          |     | information on exposures and potential confounders [ <b>page 10 and table 1</b> ]                                                                                                                                                                                                                                                                                                                                                                                                                                             |
|                          |     | (b) Indicate number of participants with missing data for each variable of interest [ <b>Table 2</b> ]                                                                                                                                                                                                                                                                                                                                                                                                                        |
|                          |     | (c) Summarise follow-up time (eg, average and total amount) [ <b>pages 12-13</b> ]                                                                                                                                                                                                                                                                                                                                                                                                                                            |
| Outcome data             | 15* | Report numbers of outcome events or summary measures over time [ <b>Tables 2 and 3</b> ]                                                                                                                                                                                                                                                                                                                                                                                                                                      |
| Main results             | 16  | (a) Give unadjusted estimates and, if applicable, confounder-adjusted estimates and their precision (eg, 95% confidence interval). Make clear which confounders were adjusted for and why they were included [ <b>n/a matched control group used to obtain net costs attributable to PPP</b> ]<br>(b) Report category boundaries when continuous variables were categorized [ <b>n/a</b> ]<br>(c) If relevant, consider translating estimates of relative risk into absolute risk for a meaningful time period [ <b>n/a</b> ] |
| Other analyses           | 17  | Report other analyses done—eg analyses of subgroups and interactions, and sensitivity analyses [ <b>page 13</b> ]                                                                                                                                                                                                                                                                                                                                                                                                             |
| <b>Discussion</b>        |     |                                                                                                                                                                                                                                                                                                                                                                                                                                                                                                                               |
| Key results              | 18  | Summarise key results with reference to study objectives [ <b>Pages 13-14</b> ]                                                                                                                                                                                                                                                                                                                                                                                                                                               |
| Limitations              | 19  | Discuss limitations of the study, taking into account sources of potential bias or imprecision. Discuss both direction and magnitude of any potential bias [ <b>Pages 14-15</b> ]                                                                                                                                                                                                                                                                                                                                             |
| Interpretation           | 20  | Give a cautious overall interpretation of results considering objectives, limitations, multiplicity of analyses, results from similar studies, and other relevant evidence [ <b>Pages 15-16</b> ]                                                                                                                                                                                                                                                                                                                             |
| Generalisability         | 21  | Discuss the generalisability (external validity) of the study results [ <b>Pages 14-15</b> ]                                                                                                                                                                                                                                                                                                                                                                                                                                  |
| <b>Other information</b> |     |                                                                                                                                                                                                                                                                                                                                                                                                                                                                                                                               |
| Funding                  | 22  | Give the source of funding and the role of the funders for the present study and, if applicable, for the original study on which the present article is based [ <b>See ‘funding’ and ‘competing interests’ data uploaded with submission</b> ]                                                                                                                                                                                                                                                                                |

\*Give information separately for exposed and unexposed groups.

**Note:** An Explanation and Elaboration article discusses each checklist item and gives methodological background and published examples of transparent reporting. The STROBE checklist is best used in conjunction with this article (freely available on the Web sites of PLoS Medicine at <http://www.plosmedicine.org/>, Annals of Internal Medicine at <http://www.annals.org/>, and Epidemiology at <http://www.epidem.com/>). Information on the STROBE Initiative is available at <http://www.strobe-statement.org>.
