# Supplementary material for: The incidence and healthcare costs of persistent postoperative pain following lumbar spine surgery in the UK: a cohort study using the Clinical Practice Research Datalink (CPRD) and Hospital Episode Statistics (HES)
Source: PubMed Central journal article supplement — BMJ Open. 2017 Sep 11;7(9):e017585. doi: 10.1136/bmjopen-2017-017585 (PMC5595197; doi:10.1136/bmjopen-2017-017585), 2017-09-11
Supplement: bmjopen-2017-017585supp002.pdf [file bmjopen-2017-017585supp002.pdf]

## Online Supplementary Material

### Description of the databases

*Hospital Episode Statistic*—The Health and Social Care Information Centre (HSCIC) now NHS Digital, is the national body for mandatory data collection from all hospitals in England. Data are captured regardless of payer status (e.g., private or government) or geographic residency of the patient.<sup>1</sup>

*Clinical Practice Research Datalink*—CPRD has records for about 5.5 million currently registered patients and approximately 13 million patients ‘ever’ registered. These data are collected from approximately 590 general practices and cover 8% of the UK population. The patient population captured in the CPRD has been shown to be broadly representative of the demographic breakdown of the UK population and the quality and completeness of the data have been well-documented.<sup>2–7</sup> These data have been used to answer a wide range of health care quality and resource utilisation questions, including studies of neuropathic pain.<sup>8–11</sup> Linkage to HES is possible for approximately half of patients in CPRD-registered practices.

### Detailed methods for calculating costs of care by encounter type

Primary care: Primary care was grouped into major types of consultation as in previous studies.<sup>12–18</sup> This included clinical consultations, surgery visits, telephone consultations, out of hour visits, administrative visits and other. The category ‘other’ included encounters as ‘repeat issue’ or ‘third party consultation’. We created separate indicators for each category. Unit costs associated with these 6 categories were assigned to each unique consultation from UK national average estimates produced by the Personal Social Services Research Unit.<sup>19</sup>

Outpatient attendances and procedures: HES outpatient data were available from 2003/04 onwards. However, the outpatient data tables were not accredited as a National Statistic prior to 2008.<sup>1</sup> We distinguished between regular outpatient attendances and outpatient attendances that included an interventional procedure. Unit costs for both types of attendance were taken from the NHS ‘Reference Costs’ publication<sup>20</sup> and were assigned by treatment specialty and by first versus follow-up visit.

Inpatient care: Stays in the HES inpatient dataset were classified as elective inpatient stays, long (>1 day) non-elective inpatient stays, short non-elective inpatient stays, day cases and regular day or night admissions. To allow costs to vary with clinical complexity of the patient, stays were grouped by NHS Healthcare Resource Groups, using the HRG4+ 2012-13 Reference Costs Grouper software<sup>21</sup> before applying reference costs for each stay category from the national schedule.<sup>20</sup> This was preferred over costing by simple per diem unit costs multiplied by number of inpatient days, which treats all inpatient encounters as equal in intensity of resources used. The HRG grouping approach allows for the inclusion of costs associated with excess bed days. Costs for cases that were not assigned to an HRG (13.4%) were estimated using the average cost by type of service. Total inpatient costs were obtained by aggregating across subcategories of inpatient care.

Accident & Emergency (A&E): Both CPRD and HES datasets contain information about A&E attendances for patients who were referred to the emergency department or who self-referred and were subsequently admitted to the hospital. A&E attendances were costed using the NHS reference costs.<sup>20</sup> and varied depending on whether attendance resulted in an inpatient admission.

Pain medications: We used the same set of prescription drug codes for pain-related analgesia, including opioids, non-steroidal anti-inflammatory drugs or NSAIDs, selected antidepressants with analgesic properties, anticonvulsant/antiepileptic drugs used for pain, and other analgesic therapies. The selected list was informed by a published randomized controlled trial of spinal cord stimulation for treatment of PPP following lumbar surgery.<sup>22,23</sup> We amended the list to add all new analgesic medications marketed in the intervening period. Each medication was costed by strength and formulation/route assigning corresponding unit costs from the British National Formulary<sup>24</sup> and multiplying by the quantity prescribed using the a methodology similar to that employed in the economic analysis of the PROCESS trial.<sup>25</sup>

## References

1. The Health and Social Care Information Centre, NHS. Hospital Episode Statistics: Hospital Outpatient Activity 2011-12 Summary Report. <http://content.digital.nhs.uk/catalogue/PUB09379/hosp-outp-acti-11-12-summ-repo-rep.pdf>. (Accessed: December 28, 2016).
2. Lewis JD, Brensinger C. Agreement between GPRD smoking data: a survey of general practitioners and a population-based survey. *Pharmacoepidemiol Drug Saf* 2004; **13**: 437–441.
3. Wood L, Martinez C. The general practice research database: role in pharmacovigilance. *Drug Saf* 2004; **27**: 871–881.
4. Jick H, Jick SS, Derby LE. Validation of information recorded on general practitioner based computerised data resource in the United Kingdom. *Brit Med J* 1991; **302**: 766–768.
5. Jick H, Terris BZ, Derby LE, Jick SS. Further validation of information recorded on a general practitioner based computerized data resource in the United Kingdom. *Pharmacoepidemiol Drug Safety* 1992; **1**: 347–349.
6. Hollowell J. The General Practice Research Database: quality of morbidity data. *Popul Trends* 1997; **87**: 36–40.
7. García Rodríguez LA, Gutthann SP. Use of the UK General Practice Research Database for pharmacoepidemiology. *Br J Clin Pharmacol* 1998; **45**: 419–425.
8. Hall GC, Carroll D, Parry D, Mcquay H. Epidemiology and treatment of neuropathic pain: the UK primary care perspective. *Pain* 2006; **122**: 156–62.
9. Hall GC, Morant SV, Carroll D, Gabriel ZL, McQuay HJ. An observational descriptive study of the epidemiology and treatment of neuropathic pain in a UK general population. *BMC Fam Pract* 2013; **14**: 28.
10. Berger A, Sadosky A, Dukes E, Edelsberg J, Oster G. Clinical characteristics and patterns of healthcare utilisation in patients with painful neuropathic disorders in UK general practice: a retrospective cohort study. *BMC Neurol* 2012; **12**: 8.
11. Hong J, Reed C, Novick D, Happich M. Costs associated with treatment of chronic low back pain: an analysis of the UK General Practice Research Database. *Spine (Phila Pa 1976)* 2013; **38**: 75–82.
12. Reed C, Hong J, Novick D, Lenox-Smith A, Happich M. Health care costs before and after diagnosis of depression in patients with unexplained pain: a retrospective cohort study using the United Kingdom General Practice Research Database. *Clinicoecon Outcomes Res* 2013; **5**: 37–47.
13. Punekar YS, Shukla A, Müllerova H. COPD management costs according to the frequency of COPD exacerbations in UK primary care. *Int J Chron Obstruct Pulmon Dis* 2014; **9**: 65–73.
14. Gulliford MC, Charlton J, Bhattarai N, Charlton C, Rudisill C. Impact and cost-effectiveness of a universal strategy to promote physical activity in primary care: population-based cohort study and Markov model. *Eur J Health Econ* 2014; **15**: 341–51.
15. Holden SE, Jenkins-Jones S, Poole CD, Morgan CL, Coghill D, Currie C. The prevalence and incidence, resource use and financial costs of treating people with attention deficit/hyperactivity disorder (ADHD) in the United Kingdom (1998 to 2010). *Child Adolesc Psychiatry Ment Health* 2013; **7**: 34.
16. Charlton J, Rudisill C, Bhattarai N, Gulliford M. Impact of deprivation on occurrence, outcomes and health care costs of people with multiple morbidity. *J Health Serv Res Policy* 2013; **18**: 215–23.
17. Hong J, Reed C, Novick D, Happich M. Costs Associated With Treatment of Chronic Low Back Pain: An Analysis of the UK General Practice Research Database. *Spine (Phila Pa 1976)* 2013; **38**: 75–82.
18. Brilleman SL, Purdy S, Salisbury C, Windmeijer F, Gravelle H, Hollinghurst S. Implications of comorbidity for primary care costs in the UK: a retrospective observational study. *Br J Gen Pract* 2013; **63**: e274–82.
19. Curtis L. [PSSRU] Unit Costs of Health and Social Care 2013. Canterbury: *Personal Social Services Research Unit, Kent*, 2013.
20. Department of Health. Reference Costs 2012-13. Available online: <https://www.gov.uk/government/publications/nhs-reference-costs-2012-to-2013> (Accessed: April 6, 2014).

21. National Health Service. Reference Cost Grouper and Documentation. Available online: <http://content.digital.nhs.uk/article/4698/HRG4-201213-Reference-Costs-Grouper-and-Documentation> (Accessed: December 28, 2016).
22. Kumar K, Taylor RS, Jacques L, et al. Spinal cord stimulation versus conventional medical management for neuropathic pain: a multicentre randomised controlled trial in patients with failed back surgery syndrome. *Pain* 2007; **132**: 179–188.
23. Kumar K, Taylor RS, Jacques L, et al. The effects of spinal cord stimulation in neuropathic pain are sustained: a 24-month follow-up of the prospective randomised controlled multicenter trial of the effectiveness of spinal cord stimulation. *Neurosurgery* 2008; **63**: 762–770.
24. British National Formulary (BNF). Available online: [http://www.bnf.org/bnf/org\\_450080.htm](http://www.bnf.org/bnf/org_450080.htm) (Accessed: September 9, 2014).
25. Manca A, Kumar K, Taylor RS, et al. Quality of life, resource consumption and costs of spinal cord stimulation versus conventional medical management in neuropathic pain patients with failed back surgery syndrome (PROCESS trial). *Eur J Pain* 2008;12:1047–1058.

## Unit Costs (2013 British Pounds)

**Table A. Unit costs of primary care**

| Type of consultation                         | Unit cost |
|----------------------------------------------|-----------|
| Clinic                                       | £66       |
| Telephone                                    | £27       |
| Out of hours /night visits/at home/emergency | £114      |
| Administrative                               | £27       |
| Surgery                                      | £45       |
| Other                                        | £66       |

Source: Curtis L. Unit Costs of Health and Social Care 2013. Canterbury, Personal Social Services Research Unit, Kent, 2013.

**Table B. Unit costs of outpatient attendances**

| Treatment specialty code <sup>1</sup> | First or follow up attendance | Unit cost |
|---------------------------------------|-------------------------------|-----------|
| 100                                   | 1                             | 117.83    |
| 100                                   | 2                             | 112.91    |
| 101                                   | 1                             | 106.53    |
| 101                                   | 2                             | 77.71     |
| 102                                   | 1                             | 371.32    |
| 102                                   | 2                             | 338.77    |
| 103                                   | 1                             | 129.79    |
| 103                                   | 2                             | 100.75    |
| 104                                   | 1                             | 123.48    |
| 104                                   | 2                             | 142.34    |
| 105                                   | 1                             | 218.97    |
| 105                                   | 2                             | 153.76    |
| 106                                   | 1                             | 120.58    |
| 106                                   | 2                             | 108.09    |
| 107                                   | 1                             | 236.32    |
| 107                                   | 2                             | 139.81    |
| 108                                   | 1                             | 198.73    |
| 108                                   | 2                             | 198.73    |
| 110                                   | 1                             | 107.04    |
| 110                                   | 2                             | 70.16     |
| 120                                   | 1                             | 96.54     |
| 120                                   | 2                             | 83.51     |
| 130                                   | 1                             | 163.94    |
| 130                                   | 2                             | 75.16     |
| 140                                   | 1                             | 124.67    |
| 140                                   | 2                             | 100.81    |
| 141                                   | 1                             | 170.57    |
| 141                                   | 2                             | 93.64     |
| 142                                   | 1                             | 159.98    |
| 142                                   | 2                             | 95.71     |
| 143                                   | 1                             | 156.19    |
| 143                                   | 2                             | 106.51    |
| 144                                   | 1                             | 111.03    |

|     |   |         |
|-----|---|---------|
| 144 | 2 | 117.49  |
| 145 | 1 | 198.73  |
| 145 | 2 | 198.73  |
| 148 | 1 | 198.73  |
| 150 | 1 | 194.55  |
| 150 | 2 | 135.68  |
| 160 | 1 | 99.24   |
| 160 | 2 | 62.93   |
| 161 | 1 | 265.93  |
| 161 | 2 | 211.68  |
| 170 | 1 | 308.85  |
| 170 | 2 | 304.11  |
| 171 | 1 | 4746.99 |
| 171 | 2 | 154.56  |
| 172 | 1 | 292.12  |
| 172 | 2 | 207.78  |
| 173 | 1 | 251.25  |
| 173 | 2 | 215.31  |
| 174 | 1 | 499.54  |
| 174 | 2 | 334.03  |
| 180 | 1 | 183.25  |
| 180 | 2 | 240.18  |
| 190 | 1 | 75.88   |
| 190 | 2 | 69.3    |
| 191 | 1 | 126.7   |
| 191 | 2 | 98.88   |
| 192 | 1 | 1564.27 |
| 192 | 2 | 105.87  |
| 199 | 1 | 198.73  |
| 199 | 2 | 198.73  |
| 211 | 1 | 242.18  |
| 211 | 2 | 114.72  |
| 214 | 1 | 142.05  |
| 214 | 2 | 118.04  |
| 215 | 1 | 114.82  |
| 215 | 2 | 101.02  |
| 216 | 1 | 134.6   |
| 216 | 2 | 129.33  |
| 217 | 1 | 378.76  |
| 217 | 2 | 320.99  |
| 218 | 2 | 182.7   |
| 219 | 1 | 154.25  |
| 219 | 2 | 99.17   |
| 222 | 1 | 134.98  |
| 251 | 1 | 148.27  |

|     |   |        |
|-----|---|--------|
| 251 | 2 | 109.13 |
| 252 | 1 | 808.96 |
| 252 | 2 | 206.14 |
| 253 | 1 | 225.36 |
| 253 | 2 | 202.28 |
| 255 | 1 | 158.35 |
| 255 | 2 | 152.29 |
| 257 | 1 | 122.58 |
| 257 | 2 | 81.29  |
| 258 | 1 | 172.74 |
| 258 | 2 | 123.73 |
| 263 | 1 | 263.09 |
| 263 | 2 | 187.77 |
| 290 | 1 | 198.73 |
| 290 | 2 | 198.73 |
| 291 | 1 | 634.2  |
| 300 | 1 | 146.55 |
| 300 | 2 | 96.03  |
| 301 | 1 | 124.89 |
| 301 | 2 | 101.07 |
| 302 | 1 | 168.86 |
| 302 | 2 | 110.76 |
| 303 | 1 | 165.82 |
| 303 | 2 | 126.05 |
| 304 | 1 | 53.89  |
| 304 | 2 | 50.71  |
| 305 | 1 | 145.79 |
| 305 | 2 | 150.83 |
| 306 | 1 | 190.9  |
| 306 | 2 | 173.07 |
| 307 | 1 | 200.18 |
| 307 | 2 | 94.83  |
| 308 | 1 | 238.45 |
| 308 | 2 | 255.3  |
| 309 | 1 | 525.32 |
| 309 | 2 | 832.36 |
| 310 | 1 | 75.62  |
| 310 | 2 | 67.67  |
| 311 | 1 | 425.08 |
| 311 | 2 | 292.45 |
| 313 | 1 | 137.1  |
| 313 | 2 | 118.89 |
| 314 | 1 | 367.82 |
| 314 | 2 | 130.29 |
| 315 | 1 | 179.78 |

|     |   |         |
|-----|---|---------|
| 315 | 2 | 142.69  |
| 316 | 1 | 245.45  |
| 316 | 2 | 138.43  |
| 317 | 1 | 159.7   |
| 317 | 2 | 140.63  |
| 318 | 1 | 198.73  |
| 318 | 2 | 198.73  |
| 320 | 1 | 137.09  |
| 320 | 2 | 114.01  |
| 321 | 1 | 302.22  |
| 321 | 2 | 134.05  |
| 322 | 1 | 88.47   |
| 322 | 2 | 98.32   |
| 323 | 1 | 331.36  |
| 323 | 2 | 266.46  |
| 324 | 1 | 39.54   |
| 324 | 2 | 21.44   |
| 325 | 2 | 117.1   |
| 327 | 1 | 108.22  |
| 327 | 2 | 49.75   |
| 328 | 1 | 170.91  |
| 328 | 2 | 143.91  |
| 329 | 1 | 202.33  |
| 329 | 2 | 155.29  |
| 330 | 1 | 82.13   |
| 330 | 2 | 76.69   |
| 340 | 1 | 206.8   |
| 340 | 2 | 127.15  |
| 341 | 1 | 84.75   |
| 341 | 2 | 90.78   |
| 342 | 1 | 87.71   |
| 342 | 2 | 60.6    |
| 343 | 2 | 228.07  |
| 350 | 1 | 136.93  |
| 350 | 2 | 166.5   |
| 352 | 1 | 277.91  |
| 352 | 2 | 327.81  |
| 360 | 1 | 93.15   |
| 360 | 2 | 67.16   |
| 361 | 1 | 2206.91 |
| 361 | 2 | 138.42  |
| 370 | 1 | 112.27  |
| 370 | 2 | 96.08   |
| 371 | 1 | 122.12  |
| 371 | 2 | 686.83  |

|     |   |        |
|-----|---|--------|
| 400 | 1 | 188.02 |
| 400 | 2 | 131.33 |
| 401 | 1 | 425.93 |
| 401 | 2 | 160.19 |
| 410 | 1 | 155.13 |
| 410 | 2 | 110.46 |
| 420 | 1 | 134.13 |
| 420 | 2 | 135.54 |
| 421 | 1 | 567.67 |
| 421 | 2 | 389.2  |
| 422 | 2 | 191.85 |
| 430 | 1 | 212.26 |
| 430 | 2 | 185.11 |
| 450 | 1 | 195.36 |
| 450 | 2 | 121.81 |
| 460 | 1 | 167.95 |
| 460 | 2 | 166.26 |
| 499 | 1 | 198.73 |
| 499 | 2 | 198.73 |
| 501 | 1 | 110.93 |
| 501 | 2 | 89.39  |
| 502 | 1 | 117.31 |
| 502 | 2 | 93.87  |
| 503 | 1 | 229.88 |
| 503 | 2 | 231.8  |
| 560 | 1 | 75.7   |
| 560 | 2 | 66.44  |
| 600 | 1 | 198.73 |
| 620 | 1 | 198.73 |
| 650 | 1 | 54.95  |
| 650 | 2 | 41.56  |
| 651 | 1 | 84.46  |
| 651 | 2 | 71.15  |
| 652 | 1 | 78.15  |
| 652 | 2 | 51.01  |
| 653 | 1 | 66.4   |
| 653 | 2 | 61.9   |
| 654 | 1 | 73.24  |
| 654 | 2 | 74.03  |
| 655 | 1 | 53.07  |
| 655 | 2 | 54.2   |
| 656 | 1 | 169.03 |
| 656 | 2 | 120.2  |
| 657 | 2 | 198.73 |
| 658 | 1 | 198.73 |



|     |   |        |
|-----|---|--------|
| 658 | 2 | 198.73 |
| 662 | 1 | 62.65  |
| 662 | 2 | 63.94  |
| 700 | 1 | 198.73 |
| 700 | 2 | 198.73 |
| 710 | 1 | 226.27 |
| 710 | 2 | 129.04 |
| 711 | 1 | 529.63 |
| 711 | 2 | 267.51 |
| 712 | 1 | 198.73 |
| 712 | 2 | 198.73 |
| 713 | 1 | 232.48 |
| 713 | 2 | 456.92 |
| 715 | 1 | 8.92   |
| 715 | 2 | 198.73 |
| 721 | 1 | 198.73 |
| 721 | 2 | 198.73 |
| 722 | 1 | 90.12  |
| 722 | 2 | 136.53 |
| 800 | 1 | 130.99 |
| 800 | 2 | 92.94  |
| 810 | 1 | 198.73 |
| 810 | 2 | 198.73 |
| 811 | 1 | 119.98 |
| 811 | 2 | 403.02 |
| 812 | 1 | 61.26  |
| 812 | 2 | 30.97  |
| 820 | 1 | 198.73 |
| 820 | 2 | 198.73 |
| 822 | 1 | 80.6   |
| 822 | 2 | 73.21  |
| 823 | 1 | 198.73 |
| 823 | 2 | 198.73 |
| 824 | 1 | 198.73 |
| 830 | 1 | 198.73 |
| 830 | 2 | 198.73 |
| 831 | 1 | 198.73 |
| 831 | 2 | 198.73 |
| 840 | 1 | 82.99  |
| 840 | 2 | 70.27  |
| 900 | 1 | 198.73 |
| 900 | 2 | 198.73 |
| 901 | 1 | 198.73 |
| 901 | 2 | 198.73 |
| 902 | 1 | 198.73 |

|     |   |        |
|-----|---|--------|
| 902 | 2 | 198.73 |
| 904 | 1 | 198.73 |
| 904 | 2 | 198.73 |
| 950 | 1 | 198.73 |
| 950 | 2 | 198.73 |
| 960 | 1 | 198.73 |
| 960 | 2 | 198.73 |

Source: Department of Health. Reference Costs 2012-13. Available online: <https://www.gov.uk/government/publications/nhs-reference-costs-2012-to-2013>.

Note(1): For a description for specialty codes see: <https://www.gov.uk/government/collections/nhs-reference-costs>.

**Table C. Unit costs of outpatient procedures**

| Treatment specialty code <sup>1</sup> | First or follow up attendance | Unit Cost |
|---------------------------------------|-------------------------------|-----------|
| 100                                   | 1                             | \$207.24  |
| 100                                   | 2                             | \$207.24  |
| 101                                   | 1                             | \$149.80  |
| 101                                   | 2                             | \$149.80  |
| 102                                   | 1                             | \$316.02  |
| 102                                   | 2                             | \$316.02  |
| 103                                   | 1                             | \$183.41  |
| 103                                   | 2                             | \$183.41  |
| 104                                   | 1                             | \$173.56  |
| 104                                   | 2                             | \$173.56  |
| 105                                   | 1                             | \$253.18  |
| 105                                   | 2                             | \$253.18  |
| 106                                   | 1                             | \$152.52  |
| 106                                   | 2                             | \$152.52  |
| 107                                   | 1                             | \$168.42  |
| 107                                   | 2                             | \$168.42  |
| 110                                   | 1                             | \$150.11  |
| 110                                   | 2                             | \$150.11  |
| 120                                   | 1                             | \$143.16  |
| 120                                   | 2                             | \$143.16  |
| 130                                   | 1                             | \$132.29  |
| 130                                   | 2                             | \$132.29  |
| 140                                   | 1                             | \$202.87  |
| 140                                   | 2                             | \$202.87  |
| 141                                   | 1                             | \$182.03  |
| 141                                   | 2                             | \$182.03  |
| 143                                   | 1                             | \$146.28  |
| 143                                   | 2                             | \$146.28  |
| 144                                   | 1                             | \$174.41  |
| 144                                   | 2                             | \$174.41  |
| 150                                   | 1                             | \$202.90  |
| 150                                   | 2                             | \$202.90  |
| 160                                   | 1                             | \$138.64  |
| 160                                   | 2                             | \$138.64  |
| 161                                   | 2                             | \$171.23  |
| 170                                   | 1                             | \$198.98  |
| 170                                   | 2                             | \$198.98  |
| 172                                   | 1                             | \$208.25  |
| 172                                   | 2                             | \$208.25  |
| 173                                   | 1                             | \$260.51  |
| 173                                   | 2                             | \$260.51  |
| 174                                   | 2                             | \$468.09  |
| 180                                   | 1                             | \$137.83  |

|     |   |            |
|-----|---|------------|
| 180 | 2 | \$137.83   |
| 190 | 1 | \$100.33   |
| 190 | 2 | \$100.33   |
| 191 | 1 | \$137.73   |
| 191 | 2 | \$137.73   |
| 211 | 2 | \$82.55    |
| 214 | 1 | \$117.67   |
| 214 | 2 | \$117.67   |
| 215 | 1 | \$128.13   |
| 215 | 2 | \$128.13   |
| 216 | 1 | \$163.31   |
| 216 | 2 | \$163.31   |
| 219 | 1 | \$115.64   |
| 252 | 2 | \$387.87   |
| 253 | 2 | \$229.43   |
| 255 | 1 | \$190.98   |
| 255 | 2 | \$190.98   |
| 257 | 1 | \$113.60   |
| 257 | 2 | \$113.60   |
| 258 | 1 | \$139.67   |
| 258 | 2 | \$139.67   |
| 263 | 2 | \$389.56   |
| 300 | 1 | \$201.64   |
| 300 | 2 | \$201.64   |
| 301 | 1 | \$213.32   |
| 301 | 2 | \$213.32   |
| 302 | 1 | \$201.80   |
| 302 | 2 | \$201.80   |
| 303 | 1 | \$191.08   |
| 303 | 2 | \$191.08   |
| 304 | 1 | \$87.00    |
| 304 | 2 | \$87.00    |
| 306 | 1 | \$279.18   |
| 306 | 2 | \$279.18   |
| 307 | 1 | \$184.33   |
| 307 | 2 | \$184.33   |
| 308 | 1 | \$3,808.25 |
| 308 | 2 | \$3,808.25 |
| 310 | 1 | \$199.79   |
| 310 | 2 | \$199.79   |
| 311 | 2 | \$312.55   |
| 313 | 1 | \$129.23   |
| 313 | 2 | \$129.23   |
| 314 | 1 | \$310.94   |
| 314 | 2 | \$310.94   |

|     |   |          |
|-----|---|----------|
| 315 | 1 | \$218.81 |
| 316 | 1 | \$238.93 |
| 316 | 2 | \$238.93 |
| 317 | 1 | \$201.90 |
| 317 | 2 | \$201.90 |
| 320 | 1 | \$161.38 |
| 320 | 2 | \$161.38 |
| 321 | 1 | \$217.81 |
| 323 | 1 | \$202.51 |
| 323 | 2 | \$202.51 |
| 324 | 1 | \$75.75  |
| 324 | 2 | \$75.75  |
| 327 | 1 | \$254.11 |
| 327 | 2 | \$254.11 |
| 328 | 1 | \$274.25 |
| 328 | 2 | \$274.25 |
| 329 | 1 | \$151.74 |
| 329 | 2 | \$151.74 |
| 330 | 1 | \$144.10 |
| 330 | 2 | \$144.10 |
| 340 | 1 | \$183.78 |
| 340 | 2 | \$183.78 |
| 341 | 1 | \$129.66 |
| 341 | 2 | \$129.66 |
| 342 | 1 | \$133.03 |
| 342 | 2 | \$133.03 |
| 350 | 1 | \$220.19 |
| 350 | 2 | \$220.19 |
| 352 | 1 | \$321.96 |
| 360 | 1 | \$255.02 |
| 360 | 2 | \$255.02 |
| 361 | 1 | \$714.11 |
| 361 | 2 | \$714.11 |
| 370 | 1 | \$216.20 |
| 370 | 2 | \$216.20 |
| 371 | 2 | \$145.89 |
| 400 | 1 | \$227.56 |
| 400 | 2 | \$227.56 |
| 401 | 1 | \$168.22 |
| 401 | 2 | \$168.22 |
| 410 | 1 | \$155.89 |
| 410 | 2 | \$155.89 |
| 420 | 1 | \$204.63 |
| 420 | 2 | \$204.63 |
| 430 | 1 | \$225.07 |

|     |   |          |
|-----|---|----------|
| 430 | 2 | \$225.07 |
| 450 | 1 | \$248.44 |
| 450 | 2 | \$248.44 |
| 460 | 1 | \$135.57 |
| 460 | 2 | \$135.57 |
| 501 | 1 | \$169.90 |
| 501 | 2 | \$169.90 |
| 502 | 1 | \$209.90 |
| 502 | 2 | \$209.90 |
| 503 | 1 | \$171.64 |
| 503 | 2 | \$171.64 |
| 560 | 1 | \$137.23 |
| 560 | 2 | \$137.23 |
| 650 | 1 | \$204.29 |
| 650 | 2 | \$204.29 |
| 651 | 1 | \$390.57 |
| 651 | 2 | \$390.57 |
| 652 | 1 | \$278.72 |
| 652 | 2 | \$278.72 |
| 653 | 1 | \$298.24 |
| 653 | 2 | \$298.24 |
| 654 | 1 | \$535.00 |
| 654 | 2 | \$535.00 |
| 655 | 1 | \$141.38 |
| 655 | 2 | \$141.38 |
| 656 | 1 | \$116.18 |
| 656 | 2 | \$116.18 |
| 662 | 1 | \$101.20 |
| 662 | 2 | \$101.20 |
| 710 | 1 | \$739.15 |
| 710 | 2 | \$739.15 |
| 713 | 1 | \$96.61  |
| 800 | 1 | \$240.80 |
| 800 | 2 | \$240.80 |
| 811 | 1 | \$487.37 |
| 811 | 2 | \$487.37 |
| 812 | 1 | \$176.07 |
| 812 | 2 | \$176.07 |
| 822 | 1 | \$51.08  |
| 822 | 2 | \$51.08  |
| 840 | 1 | \$232.49 |
| 840 | 2 | \$232.49 |

Source: Department of Health. Reference Costs 2012-13. Available online: <https://www.gov.uk/government/publications/nhs-reference-costs-2012-to-2013>.

Note(1): For a description for specialty codes, see: <https://www.gov.uk/government/collections/nhs-reference-costs>.

**Table D. Inpatient unit costs by HRG**

| <b>FCE_HRG</b> | <b>Unit Cost</b> |
|----------------|------------------|
| AA02C          | £13,543.69       |
| AA02D          | £9,098.19        |
| AA02E          | £14,942.99       |
| AA03C          | £10,996.12       |
| AA03D          | £5,129.92        |
| AA04C          | £16,033.24       |
| AA05D          | £8,433.21        |
| AA06C          | £17,411.32       |
| AA06E          | £8,824.69        |
| AA06F          | £8,115.05        |
| AA07C          | £13,079.18       |
| AA07D          | £14,303.06       |
| AA08C          | £6,390.61        |
| AA08D          | £7,680.18        |
| AA09C          | £14,803.38       |
| AA09D          | £7,495.31        |
| AA09E          | £6,550.19        |
| AA10Z          | £7,587.79        |
| AA11Z          | £11,682.94       |
| AA12C          | £3,837.17        |
| AA12D          | £8,361.61        |
| AA12E          | £6,777.98        |
| AA13C          | £9,904.20        |
| AA13D          | £7,445.59        |
| AA14Z          | £4,991.88        |
| AA15C          | £10,826.07       |
| AA15D          | £8,081.22        |
| AA15E          | £7,780.20        |
| AA16Z          | £16,019.03       |
| AA17C          | £13,293.07       |
| AA17D          | £10,625.08       |
| AA18C          | £7,801.23        |
| AA18D          | £5,120.91        |
| AA19D          | £430.38          |
| AA19E          | £4,908.06        |
| AA20C          | £5,435.30        |
| AA20D          | £1,500.60        |
| AA21C          | £3,978.43        |
| AA21D          | £7,093.43        |
| AA21E          | £807.06          |
| AA21F          | £5,543.01        |
| AA21G          | £869.99          |
| AA22C          | £7,390.09        |

|       |           |
|-------|-----------|
| AA22D | £4,932.54 |
| AA22E | £4,022.77 |
| AA22F | £2,315.96 |
| AA22G | £2,302.17 |
| AA23D | £5,085.44 |
| AA23E | £3,408.37 |
| AA23F | £3,091.88 |
| AA23G | £759.46   |
| AA24C | £5,670.86 |
| AA24D | £4,219.40 |
| AA24E | £564.33   |
| AA24F | £2,785.07 |
| AA24G | £2,394.94 |
| AA24H | £619.48   |
| AA25C | £6,997.51 |
| AA25D | £4,458.37 |
| AA25E | £3,208.93 |
| AA25F | £507.84   |
| AA25G | £509.60   |
| AA26C | £6,545.97 |
| AA26D | £4,241.63 |
| AA26E | £2,871.27 |
| AA26F | £496.75   |
| AA26G | £488.50   |
| AA26H | £432.32   |
| AA27Z | £4,322.88 |
| AA28C | £5,714.13 |
| AA28D | £450.69   |
| AA28E | £2,395.84 |
| AA28F | £1,821.09 |
| AA29C | £2,966.01 |
| AA29D | £1,979.55 |
| AA29E | £1,538.58 |
| AA29F | £508.78   |
| AA30C | £3,103.55 |
| AA30D | £2,218.05 |
| AA30E | £2,673.24 |
| AA30F | £2,177.01 |
| AA31C | £1,981.18 |
| AA31D | £2,978.14 |
| AA31E | £1,115.47 |
| AA32Z | £328.94   |
| AA33C | £537.33   |
| AA34C | £1,432.92 |
| AA34D | £1,405.95 |



|       |            |
|-------|------------|
| AA35A | £10,431.32 |
| AA35B | £11,333.42 |
| AA35C | £5,727.76  |
| AA35D | £4,024.58  |
| AA35E | £3,123.14  |
| AA35F | £2,757.17  |
| AA37Z | £5,109.45  |
| AA38Z | £15,151.50 |
| AB02Z | £904.97    |
| AB03Z | £827.35    |
| AB04Z | £704.04    |
| AB05Z | £570.44    |
| AB06Z | £619.59    |
| AB07Z | £11,122.03 |
| AB08Z | £667.16    |
| AB09Z | £575.49    |
| AB10Z | £508.69    |
| AB11Z | £155.77    |
| BZ01A | £1,124.52  |
| BZ01B | £1,109.53  |
| BZ02A | £1,574.51  |
| BZ02B | £887.91    |
| BZ02C | £865.82    |
| BZ03A | £1,006.92  |
| BZ03B | £981.66    |
| BZ04A | £323.46    |
| BZ04B | £262.68    |
| BZ05A | £2,445.85  |
| BZ05B | £3,059.31  |
| BZ06B | £2,069.08  |
| BZ06C | £1,088.93  |
| BZ06D | £970.28    |
| BZ07B | £918.10    |
| BZ07C | £5,370.68  |
| BZ07D | £793.54    |
| BZ07E | £676.73    |
| BZ08C | £4,056.93  |
| BZ08D | £2,845.03  |
| BZ09C | £1,388.89  |
| BZ09D | £1,387.95  |
| BZ10C | £658.41    |
| BZ10D | £614.48    |
| BZ11A | £5,105.46  |
| BZ11B | £2,473.14  |
| BZ12A | £2,645.63  |

|       |            |
|-------|------------|
| BZ12B | £2,394.69  |
| BZ13A | £1,969.42  |
| BZ13B | £952.30    |
| BZ14A | £1,573.42  |
| BZ15C | £1,335.33  |
| BZ15D | £1,273.00  |
| BZ16A | £1,216.46  |
| BZ17A | £1,592.26  |
| BZ17B | £2,275.41  |
| BZ18A | £1,077.58  |
| BZ18B | £1,139.77  |
| BZ19A | £609.27    |
| BZ19B | £403.55    |
| BZ20A | £2,323.62  |
| BZ20B | £2,270.07  |
| BZ21A | £3,286.41  |
| BZ21B | £2,128.24  |
| BZ21C | £2,089.76  |
| BZ22A | £989.08    |
| BZ22B | £4,276.26  |
| BZ23Z | £1,380.31  |
| BZ24D | £2,960.73  |
| BZ24E | £2,491.24  |
| BZ24F | £396.58    |
| BZ24G | £363.46    |
| CZ01V | £3,310.76  |
| CZ01Y | £1,713.06  |
| CZ02T | £2,074.72  |
| CZ02W | £841.34    |
| CZ02X | £1,726.61  |
| CZ02Y | £620.22    |
| CZ03V | £3,325.97  |
| CZ03Y | £2,926.86  |
| CZ04P | £13,947.08 |
| CZ04Q | £10,048.87 |
| CZ05S | £1,700.15  |
| CZ05T | £1,481.12  |
| CZ05V | £1,607.39  |
| CZ05Y | £1,154.04  |
| CZ07O | £9,572.39  |
| CZ07P | £5,920.08  |
| CZ07Q | £6,080.67  |
| CZ08S | £960.16    |
| CZ08T | £847.88    |
| CZ08V | £772.64    |

|       |            |
|-------|------------|
| CZ08Y | £740.72    |
| CZ09U | £2,774.15  |
| CZ09V | £2,550.10  |
| CZ09Y | £1,040.91  |
| CZ10U | £2,990.26  |
| CZ10V | £2,952.58  |
| CZ10Y | £2,917.72  |
| CZ11Z | £5,538.98  |
| CZ12U | £770.65    |
| CZ12V | £1,494.26  |
| CZ12Y | £627.38    |
| CZ13U | £1,679.89  |
| CZ13V | £1,821.94  |
| CZ13Y | £1,232.52  |
| CZ14U | £2,684.40  |
| CZ14V | £2,324.79  |
| CZ14Y | £2,308.36  |
| CZ15N | £3,253.82  |
| CZ15Q | £3,323.56  |
| CZ16N | £2,121.04  |
| CZ16Q | £2,098.25  |
| CZ17U | £3,631.39  |
| CZ17V | £4,167.67  |
| CZ17Y | £1,076.59  |
| CZ18R | £5,276.95  |
| CZ19Z | £8,743.50  |
| CZ21V | £1,211.53  |
| CZ21Y | £450.63    |
| CZ22W | £2,042.00  |
| CZ22X | £475.68    |
| CZ22Y | £490.02    |
| CZ23W | £2,767.72  |
| CZ23X | £425.39    |
| CZ23Y | £462.17    |
| CZ24O | £5,062.41  |
| CZ24P | £1,839.99  |
| CZ24Q | £1,682.02  |
| CZ25A | £21,234.63 |
| CZ27Z | £2,883.18  |
| CZ28Z | £3,854.04  |
| CZ30Y | £406.03    |
| CZ31Y | £394.31    |
| CZ32Y | £505.20    |
| CZ33Y | £534.06    |
| CZ34Y | £444.10    |

|       |            |
|-------|------------|
| CZ37U | £863.39    |
| CZ37Y | £533.18    |
| CZ38Y | £358.12    |
| CZ39U | £1,005.08  |
| CZ39Y | £818.58    |
| CZ40Y | £681.47    |
| CZ41U | £935.45    |
| CZ41Y | £771.78    |
| CZ42U | £698.00    |
| CZ42Y | £1,720.18  |
| DZ02D | £11,314.15 |
| DZ02E | £8,231.01  |
| DZ02F | £6,988.70  |
| DZ02G | £6,230.44  |
| DZ06Z | £972.56    |
| DZ07A | £630.26    |
| DZ07B | £1,358.95  |
| DZ08Z | £1,220.91  |
| DZ09D | £4,418.94  |
| DZ09E | £3,223.47  |
| DZ09F | £2,491.66  |
| DZ09G | £1,940.38  |
| DZ09H | £464.93    |
| DZ10E | £5,451.32  |
| DZ10F | £608.73    |
| DZ10G | £502.65    |
| DZ11D | £5,484.90  |
| DZ11E | £4,135.26  |
| DZ11F | £4,218.80  |
| DZ11G | £2,315.80  |
| DZ11H | £484.40    |
| DZ11J | £1,374.20  |
| DZ12C | £486.49    |
| DZ12D | £468.78    |
| DZ12E | £2,166.80  |
| DZ12F | £2,073.32  |
| DZ13A | £0.00      |
| DZ13B | £0.00      |
| DZ14C | £4,061.79  |
| DZ14D | £3,188.14  |
| DZ14E | £568.87    |
| DZ15G | £1,596.80  |
| DZ15H | £2,522.95  |
| DZ15J | £1,804.60  |
| DZ15K | £435.23    |

|       |           |
|-------|-----------|
| DZ15L | £413.76   |
| DZ16E | £3,000.27 |
| DZ16F | £514.36   |
| DZ16G | £1,765.57 |
| DZ17E | £4,098.24 |
| DZ17F | £3,183.93 |
| DZ17G | £2,680.99 |
| DZ17H | £502.54   |
| DZ17J | £1,599.15 |
| DZ17K | £586.05   |
| DZ18B | £751.07   |
| DZ18C | £700.20   |
| DZ19D | £446.58   |
| DZ19E | £1,610.16 |
| DZ19F | £431.65   |
| DZ19G | £408.33   |
| DZ20A | £3,002.65 |
| DZ20B | £490.85   |
| DZ20C | £1,664.30 |
| DZ21A | £427.38   |
| DZ21M | £3,374.69 |
| DZ21N | £2,305.75 |
| DZ21P | £2,015.09 |
| DZ21Q | £692.34   |
| DZ21R | £2,993.25 |
| DZ21S | £606.43   |
| DZ21T | £505.73   |
| DZ21U | £1,459.17 |
| DZ22D | £4,803.90 |
| DZ22E | £3,418.05 |
| DZ22F | £2,486.32 |
| DZ22G | £469.13   |
| DZ22H | £1,450.76 |
| DZ22J | £391.85   |
| DZ23E | £3,226.48 |
| DZ23F | £2,174.92 |
| DZ23G | £1,625.01 |
| DZ24D | £5,787.51 |
| DZ24E | £4,282.12 |
| DZ24F | £3,140.59 |
| DZ24G | £578.16   |
| DZ24H | £450.46   |
| DZ25C | £3,095.55 |
| DZ25D | £509.53   |
| DZ25E | £519.49   |

|       |            |
|-------|------------|
| DZ25F | £581.11    |
| DZ26C | £3,795.37  |
| DZ26D | £2,187.89  |
| DZ26E | £1,930.52  |
| DZ26F | £462.29    |
| DZ27G | £3,251.14  |
| DZ27H | £3,887.07  |
| DZ27J | £2,806.15  |
| DZ27K | £1,097.13  |
| DZ27L | £1,620.63  |
| DZ28A | £393.83    |
| DZ28B | £964.57    |
| DZ29C | £5,647.22  |
| DZ29D | £2,140.23  |
| DZ29E | £2,146.28  |
| DZ29F | £1,890.68  |
| DZ30Z | £400.44    |
| DZ37A | £1,211.51  |
| DZ38Z | £338.22    |
| DZ39Z | £0.00      |
| DZ40Z | £582.91    |
| DZ44Z | £738.51    |
| DZ49Z | £114.14    |
| DZ50Z | £675.07    |
| DZ51Z | £19,257.08 |
| DZ53A | £7,648.90  |
| DZ53B | £5,152.55  |
| DZ53C | £4,134.64  |
| DZ53D | £1,011.87  |
| DZ53E | £3,512.05  |
| DZ53F | £3,377.67  |
| DZ54Z | £2,950.88  |
| EA02Z | £46,293.95 |
| EA03A | £1,418.75  |
| EA03B | £5,610.75  |
| EA03C | £1,964.40  |
| EA03D | £1,844.97  |
| EA03E | £2,659.07  |
| EA05A | £7,438.96  |
| EA05B | £5,095.11  |
| EA05C | £2,177.15  |
| EA05D | £1,994.17  |
| EA07B | £4,846.77  |
| EA07C | £5,096.04  |
| EA11B | £1,630.04  |

|       |  |            |
|-------|--|------------|
| EA12B |  | £14,777.82 |
| EA12C |  | £14,528.01 |
| EA12D |  | £13,905.13 |
| EA14A |  | £14,538.70 |
| EA14B |  | £10,487.59 |
| EA14C |  | £8,991.28  |
| EA14D |  | £8,622.56  |
| EA16A |  | £12,763.86 |
| EA16B |  | £10,687.50 |
| EA16C |  | £9,983.10  |
| EA16D |  | £9,172.70  |
| EA17A |  | £13,173.21 |
| EA17B |  | £11,208.21 |
| EA17C |  | £9,696.82  |
| EA17D |  | £467.44    |
| EA19B |  | £11,722.26 |
| EA19C |  | £10,750.08 |
| EA20A |  | £18,302.57 |
| EA20B |  | £12,150.96 |
| EA20C |  | £9,542.71  |
| EA22Z |  | £13,738.01 |
| EA29A |  | £5,904.41  |
| EA29B |  | £5,025.82  |
| EA29C |  | £2,820.75  |
| EA31A |  | £7,214.31  |
| EA31B |  | £2,192.49  |
| EA31C |  | £3,237.70  |
| EA31D |  | £1,970.40  |
| EA35A |  | £5,597.66  |
| EA35B |  | £3,896.24  |
| EA35C |  | £1,462.02  |
| EA35D |  | £1,617.66  |
| EA36D |  | £5,695.43  |
| EA36E |  | £1,128.29  |
| EA36F |  | £2,325.68  |
| EA36G |  | £1,038.78  |
| EA36H |  | £1,618.88  |
| EA39A |  | £6,794.69  |
| EA39B |  | £1,992.40  |
| EA39C |  | £4,177.28  |
| EA40Z |  | £1,085.85  |
| EA44A |  | £798.64    |
| EA44B |  | £824.66    |
| EA45Z |  | £718.96    |
| EA47Z |  | £1,353.19  |

|       |            |
|-------|------------|
| EA48Z | £3,167.03  |
| EA49A | £7,769.81  |
| EA49B | £5,196.60  |
| EA49C | £2,980.40  |
| EA49D | £2,435.71  |
| EA51A | £15,158.11 |
| EA51B | £12,797.00 |
| EA51C | £11,391.21 |
| EA51D | £10,836.08 |
| EA52A | £18,634.08 |
| EA52B | £13,979.79 |
| EA52C | £12,498.92 |
| EA53Z | £15,953.72 |
| EA54A | £3,227.00  |
| EA54B | £3,128.34  |
| EA55B | £1,789.23  |
| EA56A | £18,143.90 |
| EA56B | £16,681.16 |
| EA56C | £14,173.03 |
| EA57A | £6,310.53  |
| EB02B | £3,914.06  |
| EB02C | £805.79    |
| EB03A | £4,509.35  |
| EB03B | £3,676.84  |
| EB03C | £506.59    |
| EB03D | £2,668.50  |
| EB03E | £1,875.30  |
| EB04Z | £463.66    |
| EB05A | £2,874.35  |
| EB05B | £2,184.22  |
| EB05C | £1,528.41  |
| EB06A | £4,298.50  |
| EB06B | £3,799.20  |
| EB06C | £2,859.23  |
| EB06D | £537.84    |
| EB07A | £3,670.91  |
| EB07B | £617.13    |
| EB07C | £1,829.87  |
| EB07D | £501.89    |
| EB07E | £805.06    |
| EB08A | £3,016.30  |
| EB08B | £2,126.28  |
| EB08C | £1,691.46  |
| EB08D | £436.89    |
| EB08E | £405.77    |



|       |           |
|-------|-----------|
| EB09A | £3,729.99 |
| EB09B | £1,837.16 |
| EB10B | £2,974.30 |
| EB10C | £2,294.84 |
| EB10D | £1,886.80 |
| EB10E | £1,555.21 |
| EB12A | £1,719.22 |
| EB12B | £443.72   |
| EB12C | £1,036.67 |
| EB13A | £1,422.71 |
| EB13B | £1,773.75 |
| EB13C | £464.16   |
| EB13D | £1,091.92 |
| EB14A | £4,443.94 |
| EB14B | £3,312.24 |
| EB14C | £2,524.94 |
| EB14D | £1,935.82 |
| EB14E | £539.63   |
| EB15B | £2,589.81 |
| EB15C | £1,941.99 |
| EC01A | £2,098.70 |
| EC01B | £2,588.05 |
| EC02A | £7,984.42 |
| FZ12L | £9,926.15 |
| FZ12M | £6,904.52 |
| FZ12N | £1,531.42 |
| FZ12P | £4,318.22 |
| FZ12Q | £3,657.44 |
| FZ12S | £4,580.50 |
| FZ13C | £852.44   |
| FZ13D | £1,870.37 |
| FZ17E | £4,799.16 |
| FZ17F | £3,478.78 |
| FZ17G | £2,815.51 |
| FZ18E | £1,315.66 |
| FZ18G | £4,801.34 |
| FZ18H | £1,475.10 |
| FZ18J | £2,118.05 |
| FZ18K | £1,957.43 |
| FZ19A | £1,765.75 |
| FZ20F | £5,792.05 |
| FZ20G | £4,027.75 |
| FZ20H | £3,110.30 |
| FZ20J | £2,762.36 |
| FZ20M | £2,928.55 |

|       |           |
|-------|-----------|
| FZ21C | £1,325.98 |
| FZ21D | £1,890.25 |
| FZ22B | £1,847.29 |
| FZ22C | £3,143.31 |
| FZ22D | £1,907.46 |
| FZ22E | £1,428.31 |
| FZ23A | £1,230.76 |
| FZ23B | £843.25   |
| FZ24G | £622.64   |
| FZ24H | £758.74   |
| FZ24J | £614.50   |
| FZ27E | £5,649.44 |
| FZ27F | £3,727.83 |
| FZ27G | £2,464.19 |
| FZ36G | £7,347.12 |
| FZ36J | £5,089.85 |
| FZ36K | £3,294.86 |
| FZ36L | £2,265.82 |
| FZ36M | £3,430.86 |
| FZ36N | £496.42   |
| FZ36P | £1,897.11 |
| FZ36Q | £440.45   |
| FZ37K | £8,305.66 |
| FZ37L | £4,449.85 |
| FZ37M | £4,244.10 |
| FZ37N | £2,733.89 |
| FZ37P | £476.43   |
| FZ37Q | £1,871.80 |
| FZ37R | £1,550.46 |
| FZ37S | £1,415.93 |
| FZ38G | £4,785.82 |
| FZ38H | £2,929.46 |
| FZ38J | £3,518.38 |
| FZ38K | £2,505.58 |
| FZ38L | £1,801.76 |
| FZ38M | £2,680.46 |
| FZ38N | £503.89   |
| FZ38P | £448.22   |
| FZ42A | £687.67   |
| FZ49D | £5,744.77 |
| FZ49E | £4,239.22 |
| FZ49G | £496.46   |
| FZ49H | £1,848.83 |
| FZ50Z | £769.19   |
| FZ51Z | £485.95   |

|       |            |
|-------|------------|
| FZ52Z | £554.48    |
| FZ53Z | £541.81    |
| FZ54Z | £411.68    |
| FZ55Z | £460.93    |
| FZ56Z | £482.70    |
| FZ57Z | £1,166.00  |
| FZ58A | £725.78    |
| FZ59Z | £345.86    |
| FZ60Z | £396.91    |
| FZ61Z | £429.29    |
| FZ62A | £1,688.57  |
| FZ63Z | £561.34    |
| FZ64A | £607.05    |
| FZ65Z | £654.68    |
| FZ66C | £13,932.55 |
| FZ66D | £8,189.81  |
| FZ66E | £3,134.54  |
| FZ66F | £5,589.72  |
| FZ67C | £10,188.49 |
| FZ67D | £6,012.88  |
| FZ67E | £4,500.28  |
| FZ67F | £3,790.60  |
| FZ69C | £19,184.77 |
| FZ70Z | £520.41    |
| FZ71D | £5,958.86  |
| FZ71F | £897.36    |
| FZ71G | £1,603.20  |
| FZ72Z | £2,031.30  |
| FZ73C | £16,930.33 |
| FZ73D | £13,373.95 |
| FZ73E | £13,300.39 |
| FZ73F | £8,743.87  |
| FZ74C | £12,875.23 |
| FZ74D | £9,334.53  |
| FZ74E | £7,989.55  |
| FZ74F | £6,883.99  |
| FZ75C | £8,436.91  |
| FZ75D | £6,312.07  |
| FZ75E | £5,575.42  |
| FZ76C | £6,792.07  |
| FZ76D | £5,430.19  |
| FZ77C | £5,412.39  |
| FZ77D | £4,025.68  |
| FZ77E | £3,485.39  |
| FZ78B | £5,587.18  |

|       |            |
|-------|------------|
| FZ79D | £9,964.10  |
| FZ79E | £6,512.34  |
| FZ80C | £18,886.63 |
| FZ80D | £12,819.12 |
| FZ80E | £9,764.70  |
| FZ81C | £11,172.73 |
| FZ81D | £8,308.93  |
| FZ81E | £5,911.18  |
| FZ83D | £4,751.89  |
| FZ83H | £2,682.26  |
| FZ83J | £4,204.90  |
| FZ83K | £3,297.37  |
| FZ84Z | £4,899.45  |
| FZ85Z | £3,810.34  |
| FZ87D | £6,128.11  |
| FZ87E | £4,664.11  |
| FZ87F | £3,847.01  |
| FZ87G | £1,569.17  |
| FZ88A | £700.60    |
| FZ89Z | £2,229.68  |
| FZ90A | £2,202.65  |
| FZ90B | £1,318.05  |
| FZ91A | £9,264.93  |
| FZ91B | £6,032.02  |
| FZ91C | £4,359.18  |
| FZ91D | £2,890.07  |
| FZ91E | £4,870.73  |
| FZ91F | £3,450.95  |
| FZ91G | £2,654.40  |
| FZ91H | £2,056.39  |
| FZ91J | £3,710.11  |
| FZ91K | £2,687.17  |
| FZ91L | £1,972.99  |
| FZ91M | £452.22    |
| FZ92A | £7,070.43  |
| FZ92B | £5,711.23  |
| FZ92C | £3,170.67  |
| FZ92D | £4,713.67  |
| FZ92E | £3,257.60  |
| FZ92F | £2,534.24  |
| FZ92G | £3,828.74  |
| FZ92H | £541.51    |
| FZ92J | £2,303.32  |
| FZ92K | £1,943.25  |
| GA01C | £20,422.28 |

|       |            |
|-------|------------|
| GA03C | £13,933.17 |
| GA03D | £10,037.67 |
| GA03E | £9,194.81  |
| GA04C | £16,609.58 |
| GA04D | £7,471.19  |
| GA05C | £9,309.58  |
| GA05D | £6,948.45  |
| GA06C | £7,033.98  |
| GA06D | £944.47    |
| GA07C | £6,248.27  |
| GA07D | £5,063.49  |
| GA07E | £3,758.99  |
| GA10G | £3,175.90  |
| GA10H | £3,934.88  |
| GA10J | £2,671.09  |
| GA10K | £2,382.68  |
| GA10L | £6,192.54  |
| GA10M | £4,218.23  |
| GA10N | £3,505.81  |
| GA12Z | £30,662.98 |
| GA13A | £3,888.00  |
| GA13B | £2,463.62  |
| GB01C | £9,378.31  |
| GB01D | £6,893.78  |
| GB01E | £1,850.13  |
| GB01F | £4,047.51  |
| GB02D | £7,208.79  |
| GB02E | £5,125.11  |
| GB02F | £1,023.66  |
| GB03C | £5,596.35  |
| GB03D | £859.66    |
| GB03E | £747.26    |
| GB03F | £667.40    |
| GB04D | £560.88    |
| GB05F | £6,752.54  |
| GB05G | £4,733.39  |
| GB05H | £1,695.15  |
| GB06E | £5,439.00  |
| GB06F | £725.33    |
| GB06G | £3,293.42  |
| GB06H | £745.86    |
| GB07Z | £707.32    |
| GB09E | £849.83    |
| GC01C | £5,495.74  |
| GC01D | £3,084.11  |

|       |            |
|-------|------------|
| GC01E | £580.59    |
| GC01F | £1,918.60  |
| GC12C | £5,930.69  |
| GC12D | £3,897.48  |
| GC12E | £2,851.69  |
| GC12F | £2,931.29  |
| GC12G | £3,100.63  |
| GC12H | £2,465.63  |
| GC12J | £1,990.09  |
| GC12K | £1,349.62  |
| GC17A | £7,854.48  |
| GC17B | £5,758.54  |
| GC17C | £4,004.99  |
| GC17D | £4,066.71  |
| GC17E | £3,565.00  |
| GC17F | £2,682.50  |
| GC17G | £3,152.24  |
| GC17H | £2,479.59  |
| GC17J | £1,931.82  |
| GC17K | £490.50    |
| HA11A | £12,489.07 |
| HA11B | £8,705.32  |
| HA11C | £7,543.60  |
| HA12B | £7,961.26  |
| HA12C | £2,365.05  |
| HA13A | £7,980.41  |
| HA13B | £6,388.99  |
| HA13C | £5,386.68  |
| HA14A | £7,615.80  |
| HA14B | £4,830.20  |
| HA14C | £3,698.78  |
| HA21B | £9,571.84  |
| HA21C | £5,722.80  |
| HA22B | £8,629.92  |
| HA22C | £4,906.88  |
| HA23B | £6,921.55  |
| HA23C | £1,683.05  |
| HA24Z | £6,023.58  |
| HA25B | £5,503.83  |
| HA25C | £1,701.15  |
| HA29Z | £903.09    |
| HA31B | £6,156.89  |
| HA31C | £4,013.69  |
| HA32Z | £5,807.90  |
| HA33Z | £4,246.83  |

|       |            |
|-------|------------|
| HA34Z | £4,051.73  |
| HA35Z | £1,252.41  |
| HA39Z | £613.35    |
| HA51Z | £1,688.69  |
| HA52Z | £1,774.44  |
| HA53Z | £1,989.39  |
| HA54Z | £1,452.04  |
| HA55Z | £1,546.57  |
| HA56A | £1,434.10  |
| HA56B | £2,107.93  |
| HA61B | £4,889.56  |
| HA61C | £4,082.81  |
| HA62Z | £1,927.10  |
| HA63Z | £1,115.96  |
| HA69Z | £601.95    |
| HA71B | £4,708.05  |
| HA71C | £2,871.56  |
| HA72Z | £2,527.75  |
| HA73B | £1,402.82  |
| HA73C | £948.45    |
| HA79Z | £1,012.81  |
| HA81A | £2,515.47  |
| HA81B | £488.63    |
| HA81C | £503.30    |
| HA83A | £1,705.28  |
| HA83B | £1,116.11  |
| HA83C | £1,058.05  |
| HA91Z | £3,861.39  |
| HA92Z | £3,426.20  |
| HA93Z | £1,495.98  |
| HA94Z | £592.67    |
| HA95Z | £921.30    |
| HA96Z | £652.79    |
| HA97Z | £1,971.17  |
| HA99Z | £4,308.02  |
| HB11A | £10,230.56 |
| HB11B | £6,493.36  |
| HB11C | £6,120.61  |
| HB12A | £8,217.36  |
| HB12B | £6,460.06  |
| HB12C | £5,880.11  |
| HB13Z | £4,333.10  |
| HB14B | £4,932.98  |
| HB14C | £1,262.27  |
| HB15D | £4,462.35  |

|       |           |
|-------|-----------|
| HB15E | £2,583.33 |
| HB15G | £2,606.19 |
| HB16B | £6,806.20 |
| HB16C | £954.36   |
| HB19Z | £729.06   |
| HB21A | £7,765.27 |
| HB21B | £6,165.26 |
| HB21C | £5,674.99 |
| HB22B | £1,477.67 |
| HB22C | £2,931.03 |
| HB23B | £3,140.86 |
| HB23C | £2,470.49 |
| HB24B | £3,892.33 |
| HB24C | £2,321.65 |
| HB25D | £5,498.79 |
| HB25E | £1,334.71 |
| HB25F | £1,325.73 |
| HB29Z | £572.44   |
| HB31Z | £4,248.35 |
| HB32A | £3,246.74 |
| HB32B | £3,917.43 |
| HB33D | £6,825.00 |
| HB33E | £1,525.68 |
| HB33G | £1,535.18 |
| HB34D | £5,381.61 |
| HB34E | £1,301.25 |
| HB35B | £4,704.63 |
| HB35C | £1,238.17 |
| HB39Z | £744.65   |
| HB51Z | £2,799.54 |
| HB52B | £3,442.59 |
| HB52C | £2,892.94 |
| HB53Z | £2,521.75 |
| HB54B | £1,345.17 |
| HB54C | £1,383.40 |
| HB55B | £979.82   |
| HB55C | £1,028.29 |
| HB56B | £4,042.02 |
| HB56C | £1,190.46 |
| HB59Z | £628.28   |
| HB61B | £3,730.08 |
| HB61C | £3,024.80 |
| HB62B | £2,402.86 |
| HB62C | £2,217.49 |
| HB63Z | £2,279.40 |



|       |            |
|-------|------------|
| HB69Z | £513.97    |
| HB71B | £1,683.20  |
| HB71C | £4,076.43  |
| HB72Z | £1,496.34  |
| HB73Z | £2,235.11  |
| HB79Z | £599.59    |
| HB91Z | £3,177.84  |
| HB99Z | £959.72    |
| HC01A | £14,243.80 |
| HC01B | £7,662.28  |
| HC01C | £6,586.51  |
| HC02D | £14,329.41 |
| HC02E | £6,437.15  |
| HC02F | £5,341.63  |
| HC03D | £4,039.63  |
| HC03E | £5,624.29  |
| HC03F | £4,332.23  |
| HC04D | £7,075.95  |
| HC04E | £4,405.29  |
| HC04F | £3,656.35  |
| HC05D | £9,266.83  |
| HC05E | £6,461.23  |
| HC05F | £841.48    |
| HC06Z | £1,596.98  |
| HC07A | £10,977.94 |
| HC07B | £6,973.66  |
| HC10Z | £402.17    |
| HC11Z | £863.62    |
| HC12Z | £636.73    |
| HC20D | £5,496.59  |
| HC20E | £3,836.73  |
| HC20F | £2,994.39  |
| HC20G | £2,361.26  |
| HC21D | £15,961.04 |
| HC21E | £4,759.89  |
| HC26D | £760.81    |
| HC26E | £695.56    |
| HC26F | £683.46    |
| HC27D | £4,996.22  |
| HC27E | £3,245.03  |
| HC27F | £2,369.57  |
| HC27G | £505.17    |
| HC28D | £10,324.42 |
| HC28E | £7,109.83  |
| HC28F | £4,011.42  |

|       |            |
|-------|------------|
| HC28G | £3,421.42  |
| HC29A | £441.63    |
| HC29B | £420.45    |
| HC30D | £5,990.65  |
| HC30E | £3,016.77  |
| HC31D | £7,351.68  |
| HC31E | £4,906.91  |
| HC31F | £4,743.18  |
| HC31G | £646.72    |
| HC32D | £533.04    |
| HC32E | £478.69    |
| HC32F | £462.15    |
| HC40A | £21,410.92 |
| HC40B | £15,985.84 |
| HC41A | £8,891.94  |
| HC41B | £7,031.53  |
| HC42Z | £10,543.24 |
| HC43Z | £9,261.06  |
| HD21D | £3,417.26  |
| HD21E | £2,589.77  |
| HD21F | £1,862.62  |
| HD21G | £406.97    |
| HD21H | £1,522.69  |
| HD23D | £6,584.68  |
| HD23E | £544.27    |
| HD23F | £413.08    |
| HD23G | £431.89    |
| HD23H | £424.66    |
| HD23J | £432.54    |
| HD24D | £4,665.17  |
| HD24E | £3,569.75  |
| HD24F | £2,453.16  |
| HD24G | £2,226.71  |
| HD24H | £403.46    |
| HD25D | £643.63    |
| HD25E | £707.35    |
| HD25F | £3,725.69  |
| HD25G | £3,231.34  |
| HD25H | £2,710.61  |
| HD26D | £521.16    |
| HD26E | £2,403.23  |
| HD26F | £458.48    |
| HD26G | £430.37    |
| HD39E | £4,225.92  |
| HD39F | £3,041.80  |

|       |            |
|-------|------------|
| HD39G | £2,492.79  |
| HD39H | £1,921.15  |
| HD40D | £8,531.13  |
| HD40E | £4,343.94  |
| HD40F | £3,539.32  |
| HD40G | £2,744.69  |
| HD40H | £377.65    |
| HR07A | £5,970.80  |
| HR07B | £7,470.47  |
| HR07C | £8,876.42  |
| HR08A | £5,420.64  |
| HR08B | £6,744.73  |
| HR08C | £10,303.59 |
| HR09A | £5,588.98  |
| HR09B | £7,825.23  |
| HR09C | £15,557.92 |
| JA12D | £5,353.82  |
| JA12E | £3,576.57  |
| JA12F | £2,672.39  |
| JA12G | £4,076.51  |
| JA12H | £2,304.75  |
| JA12J | £1,283.25  |
| JA12K | £497.76    |
| JA12L | £1,294.77  |
| JA13A | £2,487.08  |
| JA13B | £1,797.83  |
| JA13C | £407.72    |
| JA14Z | £8,984.75  |
| JA18Z | £654.24    |
| JA19Z | £609.14    |
| JA20D | £3,599.49  |
| JA20E | £3,125.52  |
| JA20F | £2,900.49  |
| JA21A | £3,884.88  |
| JA21B | £3,423.41  |
| JA24D | £1,365.46  |
| JA24E | £2,480.14  |
| JA24F | £1,288.46  |
| JA25Z | £2,262.30  |
| JA26A | £4,397.62  |
| JA26B | £3,674.96  |
| JA26C | £3,476.29  |
| JA27Z | £6,748.28  |
| JA28Z | £11,072.09 |
| JA30Z | £5,488.31  |

|       |            |
|-------|------------|
| JB30C | £818.93    |
| JB31A | £34,548.56 |
| JB32A | £4,925.04  |
| JB32B | £4,242.81  |
| JB32C | £2,638.62  |
| JB33A | £10,761.97 |
| JB33B | £3,111.75  |
| JB33C | £493.06    |
| JC40Z | £10,970.68 |
| JC41Z | £5,326.68  |
| JC42A | £1,029.92  |
| JC42B | £986.16    |
| JC43A | £623.84    |
| JC43B | £859.15    |
| JC47A | £48.38     |
| JD07A | £7,618.31  |
| JD07B | £5,453.27  |
| JD07C | £3,609.36  |
| JD07D | £2,491.79  |
| JD07E | £506.50    |
| JD07F | £593.60    |
| JD07G | £3,064.28  |
| JD07H | £2,335.07  |
| JD07J | £1,789.28  |
| JD07K | £1,371.42  |
| KA03C | £2,902.57  |
| KA03D | £2,522.20  |
| KA04B | £5,111.70  |
| KA05C | £576.73    |
| KA05D | £515.58    |
| KA06C | £4,158.03  |
| KA06D | £1,938.75  |
| KA06E | £1,664.03  |
| KA07A | £3,096.36  |
| KA07B | £1,826.34  |
| KA07C | £1,408.13  |
| KA08A | £748.87    |
| KA08B | £487.48    |
| KA08C | £425.15    |
| KA09C | £5,743.92  |
| KA09D | £4,006.02  |
| KA09E | £3,230.69  |
| KB01C | £485.26    |
| KB01D | £426.23    |
| KB01E | £554.32    |

|       |            |
|-------|------------|
| KB01F | £391.14    |
| KB02G | £2,822.99  |
| KB02H | £463.36    |
| KB02J | £448.44    |
| KB02K | £415.98    |
| KB03C | £3,870.81  |
| KB03D | £2,549.46  |
| KB03E | £2,138.25  |
| KB04Z | £1,958.24  |
| KC04A | £507.03    |
| KC04B | £267.75    |
| KC05G | £4,544.43  |
| KC05H | £4,024.18  |
| KC05J | £3,070.54  |
| KC05K | £2,244.14  |
| KC05L | £462.93    |
| KC05M | £1,062.38  |
| KC05N | £1,305.90  |
| LA02A | £20,798.61 |
| LA03A | £18,205.21 |
| LA04J | £6,115.86  |
| LA04K | £4,428.48  |
| LA04L | £3,268.28  |
| LA04M | £2,125.60  |
| LA04N | £4,874.17  |
| LA04P | £3,495.46  |
| LA04Q | £2,451.10  |
| LA04R | £476.80    |
| LA04S | £447.02    |
| LA05Z | £785.01    |
| LA07H | £5,969.44  |
| LA07J | £4,527.07  |
| LA07K | £3,248.23  |
| LA07L | £3,936.57  |
| LA07M | £548.46    |
| LA07N | £2,227.42  |
| LA07P | £490.22    |
| LA08H | £3,805.42  |
| LA08J | £2,949.90  |
| LA08K | £3,920.89  |
| LA08L | £3,231.83  |
| LA08M | £342.15    |
| LA08N | £300.99    |
| LA08P | £2,137.26  |
| LA09K | £3,184.56  |

|       |           |
|-------|-----------|
| LA09L | £2,469.46 |
| LA09N | £2,843.00 |
| LA09P | £1,797.58 |
| LA09Q | £1,366.99 |
| LA97A | £0.00     |
| LB05E | £3,817.98 |
| LB05F | £3,399.78 |
| LB05G | £2,487.93 |
| LB06J | £4,239.80 |
| LB06K | £3,367.81 |
| LB06L | £2,273.24 |
| LB06M | £2,164.00 |
| LB06N | £4,934.12 |
| LB06P | £3,725.97 |
| LB06Q | £2,341.83 |
| LB06R | £445.60   |
| LB06S | £1,243.65 |
| LB09D | £713.76   |
| LB10C | £6,918.01 |
| LB10D | £5,302.30 |
| LB12Z | £3,377.65 |
| LB13C | £4,286.46 |
| LB13D | £2,654.36 |
| LB13E | £1,062.30 |
| LB13F | £1,815.17 |
| LB14Z | £769.18   |
| LB15E | £487.60   |
| LB16D | £2,930.21 |
| LB16E | £2,186.91 |
| LB16F | £2,130.46 |
| LB16G | £2,546.28 |
| LB16H | £1,804.13 |
| LB16J | £1,514.76 |
| LB16K | £396.56   |
| LB17Z | £288.52   |
| LB18Z | £385.29   |
| LB19C | £3,153.41 |
| LB19D | £2,028.35 |
| LB19E | £2,645.85 |
| LB19F | £347.75   |
| LB19G | £796.40   |
| LB20C | £2,565.35 |
| LB20D | £1,601.59 |
| LB20E | £2,201.68 |
| LB20F | £450.12   |

|       |            |
|-------|------------|
| LB20G | £1,127.74  |
| LB21A | £5,469.42  |
| LB21B | £5,236.04  |
| LB22Z | £5,594.58  |
| LB25D | £3,676.54  |
| LB25E | £2,644.44  |
| LB25F | £2,393.78  |
| LB26A | £1,958.34  |
| LB26B | £1,670.04  |
| LB27Z | £586.81    |
| LB28C | £2,160.84  |
| LB28D | £1,401.77  |
| LB28E | £2,657.64  |
| LB28F | £458.42    |
| LB28G | £1,305.66  |
| LB29A | £3,861.40  |
| LB33Z | £773.42    |
| LB35C | £3,050.63  |
| LB35D | £2,607.77  |
| LB35E | £564.74    |
| LB35F | £1,686.33  |
| LB35G | £1,455.92  |
| LB35H | £1,279.58  |
| LB36Z | £506.12    |
| LB37C | £2,070.92  |
| LB37D | £422.65    |
| LB37E | £385.23    |
| LB38D | £2,104.76  |
| LB38E | £1,609.14  |
| LB38F | £472.22    |
| LB38G | £1,665.80  |
| LB38H | £324.41    |
| LB39C | £10,837.55 |
| LB39D | £9,429.91  |
| LB40C | £2,743.54  |
| LB40D | £1,964.20  |
| LB40F | £1,450.39  |
| LB40G | £465.77    |
| LB42A | £428.18    |
| LB43Z | £359.26    |
| LB46Z | £6,952.52  |
| LB47Z | £5,059.08  |
| LB48Z | £2,479.57  |
| LB49Z | £2,454.11  |
| LB50Z | £4,903.03  |

|       |            |
|-------|------------|
| LB51A | £1,897.63  |
| LB51B | £1,534.97  |
| LB52A | £6,607.34  |
| LB52B | £2,242.84  |
| LB53C | £1,467.66  |
| LB53D | £1,763.33  |
| LB54A | £1,116.61  |
| LB54C | £1,468.27  |
| LB55A | £683.35    |
| LB55B | £943.14    |
| LB56A | £1,026.29  |
| LB56C | £1,543.16  |
| LB57C | £2,176.85  |
| LB57D | £476.21    |
| LB58C | £2,190.53  |
| LB58D | £413.21    |
| LB59Z | £3,684.69  |
| LB60C | £9,573.79  |
| LB60E | £6,065.43  |
| LB60F | £5,210.39  |
| LB61C | £8,463.93  |
| LB61D | £6,064.71  |
| LB61E | £4,998.45  |
| LB61F | £4,914.89  |
| LB61G | £4,796.58  |
| LB62C | £6,486.22  |
| LB62D | £5,326.93  |
| LB64C | £6,098.13  |
| LB64D | £2,996.65  |
| LB64E | £2,489.19  |
| LB65C | £3,374.79  |
| LB65D | £2,531.37  |
| LB65E | £1,425.40  |
| LB67C | £13,522.65 |
| LB67D | £8,966.55  |
| LB68A | £4,166.50  |
| LB68B | £2,623.50  |
| LB69Z | £7,763.84  |
| LB70C | £3,045.32  |
| LB70D | £2,615.13  |
| LB72A | £409.36    |
| LB72B | £801.53    |
| LB74Z | £3,982.15  |
| MA01Z | £5,467.73  |
| MA02B | £4,209.72  |



|       |           |
|-------|-----------|
| MA02C | £3,676.11 |
| MA03C | £3,107.58 |
| MA03D | £2,532.15 |
| MA04C | £2,501.14 |
| MA04D | £2,087.46 |
| MA06A | £4,871.05 |
| MA06B | £3,783.22 |
| MA06C | £3,362.98 |
| MA07E | £5,336.99 |
| MA07F | £3,944.64 |
| MA07G | £3,255.48 |
| MA08A | £3,209.11 |
| MA08B | £2,888.08 |
| MA09Z | £1,542.47 |
| MA10Z | £1,180.92 |
| MA11Z | £2,840.05 |
| MA12Z | £1,112.56 |
| MA17C | £1,150.77 |
| MA17D | £1,449.77 |
| MA18C | £729.37   |
| MA18D | £991.08   |
| MA19A | £724.06   |
| MA19B | £735.02   |
| MA20Z | £1,227.49 |
| MA22Z | £1,375.81 |
| MA23Z | £910.72   |
| MA24Z | £1,009.95 |
| MA25Z | £817.73   |
| MA26A | £6,851.03 |
| MA26B | £5,026.02 |
| MA26C | £4,594.76 |
| MA27Z | £1,030.43 |
| MA28Z | £3,668.44 |
| MA29Z | £1,544.79 |
| MA30Z | £1,350.66 |
| MA31Z | £775.03   |
| MA32Z | £846.25   |
| MA33Z | £885.70   |
| MA34Z | £1,166.77 |
| MA35Z | £631.48   |
| MA36Z | £433.61   |
| MA38Z | £503.08   |
| MA39Z | £395.81   |
| MA40Z | £699.03   |
| MB05C | £6,662.48 |

|       |           |
|-------|-----------|
| MB05D | £5,287.21 |
| MB05E | £3,537.51 |
| MB05F | £2,303.05 |
| MB05G | £5,387.16 |
| MB05H | £3,710.38 |
| MB05J | £3,141.07 |
| MB05K | £1,569.16 |
| MB05L | £1,557.71 |
| MB08A | £1,732.75 |
| MB08B | £466.09   |
| MB09B | £2,566.40 |
| MB09C | £2,428.72 |
| MB09D | £2,206.44 |
| MB09E | £542.97   |
| MB09F | £514.50   |
| MC09Z | £502.28   |
| MC11Z | £903.32   |
| MC12Z | £1,079.44 |
| NZ10Z | £741.28   |
| NZ16Z | £514.84   |
| NZ17A | £1,742.01 |
| NZ17B | £0.00     |
| NZ18A | £2,327.73 |
| NZ18B | £643.79   |
| NZ19A | £632.65   |
| NZ19B | £520.77   |
| NZ20A | £569.62   |
| NZ20B | £513.72   |
| NZ21Z | £0.00     |
| NZ22Z | £231.50   |
| NZ23Z | £649.69   |
| NZ24B | £2,146.26 |
| NZ25Z | £1,766.53 |
| NZ26A | £670.03   |
| NZ26B | £2,065.46 |
| NZ27Z | £2,284.30 |
| NZ30A | £2,262.55 |
| NZ30B | £1,147.73 |
| NZ30C | £1,092.15 |
| NZ31A | £2,685.65 |
| NZ31B | £2,425.97 |
| NZ31C | £2,208.06 |
| NZ32A | £3,075.14 |
| NZ32B | £2,640.80 |
| NZ32C | £0.00     |

|       |           |
|-------|-----------|
| NZ33A | £2,983.78 |
| NZ33B | £2,735.70 |
| NZ33C | £2,512.40 |
| NZ34B | £2,881.51 |
| NZ34C | £2,825.40 |
| NZ40A | £1,360.86 |
| NZ40B | £2,488.36 |
| NZ40C | £2,253.11 |
| NZ41A | £3,165.62 |
| NZ41B | £1,538.37 |
| NZ41C | £2,532.36 |
| NZ42A | £3,536.05 |
| NZ42B | £3,001.46 |
| NZ42C | £2,719.67 |
| NZ43B | £3,130.63 |
| NZ43C | £2,929.01 |
| NZ44A | £3,855.94 |
| NZ44B | £1,883.85 |
| NZ44C | £3,175.10 |
| NZ50A | £4,044.71 |
| NZ50B | £3,127.84 |
| NZ50C | £1,939.33 |
| NZ51A | £5,164.17 |
| NZ51B | £4,126.61 |
| NZ51C | £3,441.76 |
| PA01A | £3,913.13 |
| PA01B | £830.64   |
| PA02A | £608.50   |
| PA03B | £514.21   |
| PA04A | £572.08   |
| PA04B | £490.55   |
| PA07B | £1,523.56 |
| PA08A | £2,350.40 |
| PA08B | £692.65   |
| PA11Z | £467.62   |
| PA12Z | £1,410.11 |
| PA14C | £3,250.84 |
| PA14D | £679.77   |
| PA14E | £490.45   |
| PA16B | £1,803.64 |
| PA17B | £1,724.24 |
| PA19A | £535.54   |
| PA21B | £1,381.30 |
| PA22Z | £1,479.29 |
| PA23A | £3,399.55 |

|       |            |
|-------|------------|
| PA23B | £2,303.84  |
| PA24Z | £1,899.46  |
| PA25A | £4,433.02  |
| PA26A | £3,008.65  |
| PA26B | £1,542.16  |
| PA27Z | £2,968.28  |
| PA28A | £2,693.99  |
| PA28B | £488.44    |
| PA29Z | £505.45    |
| PA30B | £651.62    |
| PA31Z | £4,543.05  |
| PA32B | £576.32    |
| PA34A | £2,680.24  |
| PA34B | £532.44    |
| PA35B | £1,857.51  |
| PA36Z | £2,269.61  |
| PA48B | £2,176.65  |
| PA50Z | £480.04    |
| PA52C | £12,554.75 |
| PA56B | £1,487.55  |
| PA57Z | £1,818.39  |
| PA58Z | £511.94    |
| PA59E | £3,319.78  |
| PA59F | £1,797.45  |
| PA62Z | £457.81    |
| PA63B | £636.20    |
| PA63C | £1,469.76  |
| PA65A | £458.62    |
| PA67Z | £1,642.07  |
| PA68Z | £2,000.68  |
| PA69Z | £1,873.06  |
| PA70Z | £477.02    |
| QZ01C | £13,766.98 |
| QZ01D | £11,208.28 |
| QZ01E | £8,378.49  |
| QZ01F | £7,077.00  |
| QZ02C | £13,767.89 |
| QZ02D | £9,768.56  |
| QZ02E | £6,446.11  |
| QZ02F | £5,459.81  |
| QZ03B | £10,563.15 |
| QZ05C | £1,898.17  |
| QZ05D | £1,009.31  |
| QZ05E | £1,008.63  |
| QZ05F | £1,047.03  |

|       |            |
|-------|------------|
| QZ11C | £15,879.14 |
| QZ11D | £12,287.67 |
| QZ11E | £10,158.69 |
| QZ11F | £8,750.96  |
| QZ12A | £9,783.80  |
| QZ12B | £6,657.74  |
| QZ12C | £5,260.20  |
| QZ12D | £4,373.55  |
| QZ12E | £1,098.05  |
| QZ13Z | £1,805.34  |
| QZ14Z | £474.97    |
| QZ15D | £8,857.14  |
| QZ15E | £9,724.57  |
| QZ15F | £4,155.53  |
| QZ15G | £2,494.01  |
| QZ15H | £3,368.50  |
| QZ15J | £2,291.41  |
| QZ16D | £1,312.97  |
| QZ16E | £864.87    |
| QZ16F | £3,951.22  |
| QZ16G | £3,331.18  |
| QZ16H | £3,224.26  |
| QZ17D | £5,790.42  |
| QZ17E | £4,782.02  |
| QZ17F | £693.37    |
| QZ17G | £671.77    |
| QZ17H | £2,194.59  |
| QZ17J | £512.96    |
| QZ19Z | £1,832.80  |
| QZ20B | £494.16    |
| QZ20C | £2,516.87  |
| QZ20D | £1,587.00  |
| QZ20E | £1,201.02  |
| QZ21A | £1,534.74  |
| QZ21B | £1,528.98  |
| QZ22A | £1,230.38  |
| QZ22B | £1,074.02  |
| QZ24A | £5,212.58  |
| QZ24B | £4,172.97  |
| QZ24C | £3,943.14  |
| QZ25A | £5,607.22  |
| QZ25B | £3,814.50  |
| RC02Z | £1,807.21  |
| RC12A | £8,332.30  |
| RC12C | £10,406.44 |

|       |            |
|-------|------------|
| RC12D | £10,515.15 |
| RC12E | £12,466.92 |
| RC13C | £18,285.51 |
| RC14Z | £2,650.85  |
| RC15Z | £3,250.40  |
| RC16Z | £5,947.00  |
| RC31Z | £3,080.66  |
| RC32Z | £3,359.62  |
| RC33Z | £4,940.19  |
| RC41Z | £1,957.52  |
| RC51Z | £8,339.11  |
| SA01G | £3,209.85  |
| SA01H | £621.99    |
| SA02G | £3,698.15  |
| SA02H | £817.28    |
| SA02J | £3,068.06  |
| SA03G | £2,722.24  |
| SA04G | £426.96    |
| SA04H | £584.04    |
| SA04J | £526.03    |
| SA04K | £308.79    |
| SA04L | £360.21    |
| SA05H | £1,751.69  |
| SA05J | £364.28    |
| SA06G | £932.47    |
| SA06H | £323.49    |
| SA06J | £636.20    |
| SA06K | £914.14    |
| SA07G | £285.16    |
| SA07H | £3,223.75  |
| SA07J | £314.78    |
| SA08G | £554.24    |
| SA08H | £2,050.03  |
| SA08J | £502.54    |
| SA09G | £3,267.18  |
| SA09H | £2,310.08  |
| SA09J | £556.94    |
| SA09K | £1,493.30  |
| SA09L | £1,293.93  |
| SA12G | £3,574.36  |
| SA12H | £2,586.97  |
| SA12J | £372.45    |
| SA12K | £707.78    |
| SA13A | £482.51    |
| SA13B | £705.55    |

|       |            |
|-------|------------|
| SA14Z | £9,908.42  |
| SA17G | £4,081.88  |
| SA17H | £288.20    |
| SA18Z | £727.73    |
| SA19A | £9,817.12  |
| SA21A | £68,952.39 |
| SA24J | £4,535.27  |
| SA25G | £12,199.39 |
| SA25H | £512.39    |
| SA25J | £11,638.22 |
| SA25K | £8,970.10  |
| SA25L | £5,147.49  |
| SA25M | £391.34    |
| SA26A | £16,115.69 |
| SA30A | £8,376.93  |
| SA30B | £4,480.35  |
| SA30C | £3,983.43  |
| SA30D | £3,241.63  |
| SA30E | £362.36    |
| SA31A | £10,209.91 |
| SA31B | £6,511.20  |
| SA31C | £4,395.19  |
| SA31D | £411.14    |
| SA31E | £3,279.83  |
| SA31F | £389.52    |
| SA32C | £337.90    |
| SA32D | £384.63    |
| SA33Z | £530.82    |
| SA34Z | £3,816.68  |
| SA35B | £3,345.86  |
| SA35C | £2,548.07  |
| SA35D | £549.89    |
| SA35E | £1,775.76  |
| SA36A | £3,799.11  |
| SA36B | £2,409.34  |
| SA36C | £468.24    |
| SA37Z | £390.80    |
| SB97Z | £0.00      |
| SC97Z | £0.00      |
| UZ01Z | £0.00      |
| VA10A | £569.25    |
| VA10B | £2,655.92  |
| VA10C | £3,280.54  |
| VA10D | £5,207.60  |
| VA11A | £857.58    |

|       |            |
|-------|------------|
| VA11B | £3,622.68  |
| VA11C | £1,163.69  |
| VA11D | £8,685.13  |
| VA12A | £4,935.13  |
| VA12B | £1,778.03  |
| VA12C | £7,170.38  |
| VA12D | £9,786.02  |
| VA13A | £5,525.23  |
| VA13B | £5,696.81  |
| VA13C | £8,641.99  |
| VA13D | £12,174.40 |
| VA14A | £7,821.35  |
| VA14D | £7,835.66  |
| VA15C | £15,836.28 |
| WA01W | £5,006.52  |
| WA01Y | £3,209.65  |
| WA02Z | £406.25    |
| WA03A | £4,572.79  |
| WA03B | £3,147.09  |
| WA03C | £2,223.86  |
| WA04Z | £1,214.85  |
| WA05Z | £3,334.39  |
| WA06A | £6,054.21  |
| WA06B | £450.56    |
| WA06C | £404.27    |
| WA07Z | £520.48    |
| WA08Z | £538.90    |
| WA09A | £4,100.05  |
| WA09B | £2,587.80  |
| WA09C | £1,968.41  |
| WA10Z | £2,088.53  |
| WA11A | £2,223.02  |
| WA11B | £412.34    |
| WA11C | £390.24    |
| WA12A | £6,114.94  |
| WA12B | £3,756.52  |
| WA12C | £2,821.56  |
| WA12D | £2,046.96  |
| WA14A | £374.61    |
| WA14B | £673.71    |
| WA15A | £7,799.86  |
| WA15B | £4,036.00  |
| WA15V | £1,059.85  |
| WA16W | £1,364.77  |
| WA16Y | £370.14    |



|       |           |
|-------|-----------|
| WA17A | £3,987.07 |
| WA17C | £1,580.32 |
| WA17D | £1,368.60 |
| WA18A | £4,264.16 |
| WA18B | £2,467.62 |
| WA18C | £451.85   |
| WA18D | £473.55   |
| WA18E | £1,661.02 |
| WA18F | £427.71   |
| WA19Z | £1,356.43 |
| WA20Z | £409.28   |
| WA21Z | £286.31   |
| WA22A | £3,165.03 |
| WA22B | £506.13   |
| WA22C | £1,929.65 |
| WA23A | £4,292.64 |
| WA23B | £1,826.64 |
| WA23C | £1,871.27 |
| WA24A | £1,281.84 |
| WA24B | £1,005.80 |
| WD11Z | £480.61   |
| WD22Z | £379.98   |
| WF01A | £0.00     |
| WF02A | £0.00     |

Source: NHS Digital. HRG4+ 2012/13 Reference Costs Grouper and Documentation. Available online:  
<http://content.digital.nhs.uk/article/4698/HRG4-201213-Reference-Costs-Grouper-and-Documentation>.

**Table E. Unit costs of pain medications**

| <b>Product code<sup>1</sup></b> | <b>Unit cost</b> |
|---------------------------------|------------------|
| 4                               | 0.877            |
| 7                               | 0.058            |
| 11                              | 0.041            |
| 15                              | 0.048            |
| 19                              | 0.058            |
| 40                              | 0.057            |
| 49                              | 0.036            |
| 53                              | 0.044            |
| 57                              | 0.058            |
| 83                              | 0.032            |
| 86                              | 0.046            |
| 96                              | 0.051            |
| 112                             | 0.061            |
| 120                             | 0.061            |
| 123                             | 0.862            |
| 124                             | 0.877            |
| 126                             | 0.023            |
| 129                             | 0.098            |
| 139                             | 0.058            |
| 140                             | 0.098            |
| 141                             | 0.121            |
| 156                             | 0.603            |
| 157                             | 0.311            |
| 158                             | 0.051            |
| 162                             | 0.057            |
| 177                             | 0.061            |
| 182                             | 0.035            |
| 187                             | 0.046            |
| 191                             | 0.107            |
| 213                             | 0.057            |
| 234                             | 0.962            |
| 249                             | 0.458            |
| 258                             | 0.058            |
| 259                             | 0.023            |
| 262                             | 0.877            |
| 296                             | 0.064            |
| 306                             | 0.057            |
| 320                             | 0.492            |
| 328                             | 1.044            |
| 332                             | 0.061            |
| 341                             | 0.121            |
| 354                             | 10.546           |

|     |        |
|-----|--------|
| 360 | 0.936  |
| 382 | 0.038  |
| 387 | 0.267  |
| 389 | 0.135  |
| 392 | 0.057  |
| 396 | 0.101  |
| 402 | 0.057  |
| 407 | 0.098  |
| 416 | 0.057  |
| 417 | 0.057  |
| 423 | 0.458  |
| 447 | 0.207  |
| 458 | 0.166  |
| 462 | 2.37   |
| 474 | 0.359  |
| 487 | 0.036  |
| 495 | 0.046  |
| 497 | 0.076  |
| 499 | 0.057  |
| 526 | 0.161  |
| 539 | 0.128  |
| 551 | 5.06   |
| 580 | 0.207  |
| 586 | 0.057  |
| 589 | 0.057  |
| 595 | 0.036  |
| 597 | 0.057  |
| 607 | 0.262  |
| 612 | 0.076  |
| 617 | 0.493  |
| 620 | 3.598  |
| 625 | 0.058  |
| 628 | 0.076  |
| 635 | 2.37   |
| 647 | 0.936  |
| 649 | 0.076  |
| 650 | 0.718  |
| 655 | 0.633  |
| 656 | 0.058  |
| 659 | 0.192  |
| 660 | 0.042  |
| 661 | 0.045  |
| 676 | 0.829  |
| 685 | 45.472 |
| 687 | 0.155  |

|      |       |
|------|-------|
| 701  | 0.046 |
| 715  | 15    |
| 736  | 0.05  |
| 748  | 3.598 |
| 754  | 0.035 |
| 757  | 6.731 |
| 759  | 0.029 |
| 767  | 0.058 |
| 784  | 0.166 |
| 790  | 1.15  |
| 800  | 0.051 |
| 807  | 0.098 |
| 810  | 0.051 |
| 819  | 1.15  |
| 826  | 0.71  |
| 827  | 0.603 |
| 838  | 0.813 |
| 849  | 0.048 |
| 850  | 0.035 |
| 855  | 0.029 |
| 899  | 0.877 |
| 901  | 0.029 |
| 913  | 0.057 |
| 917  | 0.057 |
| 919  | 1.761 |
| 920  | 1.761 |
| 928  | 0.076 |
| 1030 | 0.016 |
| 1043 | 0.118 |
| 1051 | 0.076 |
| 1068 | 0.877 |
| 1073 | 0.064 |
| 1075 | 0.057 |
| 1086 | 0.098 |
| 1096 | 0.076 |
| 1115 | 0.311 |
| 1116 | 0.311 |
| 1139 | 0.076 |
| 1147 | 0.029 |
| 1156 | 0.061 |
| 1208 | 0.036 |
| 1210 | 0.076 |
| 1231 | 0.433 |
| 1233 | 0.207 |
| 1246 | 0.023 |

|      |        |
|------|--------|
| 1261 | 0.051  |
| 1270 | 0.061  |
| 1392 | 0.138  |
| 1404 | 0.877  |
| 1446 | 0.057  |
| 1468 | 0.057  |
| 1469 | 0.045  |
| 1470 | 0.045  |
| 1496 | 0.076  |
| 1503 | 0.633  |
| 1544 | 0.052  |
| 1571 | 0.433  |
| 1584 | 0.072  |
| 1609 | 0.058  |
| 1621 | 0.057  |
| 1640 | 0.058  |
| 1688 | 0.05   |
| 1689 | 0.029  |
| 1692 | 0.057  |
| 1708 | 0.166  |
| 1739 | 0.048  |
| 1755 | 0.307  |
| 1766 | 0.207  |
| 1778 | 0.267  |
| 1808 | 70.239 |
| 1862 | 0.058  |
| 1866 | 0.098  |
| 1888 | 0.037  |
| 1983 | 0.023  |
| 1984 | 0.311  |
| 1999 | 1.38   |
| 2034 | 1.38   |
| 2040 | 0.058  |
| 2041 | 0.093  |
| 2047 | 0.057  |
| 2055 | 0.877  |
| 2129 | 0.138  |
| 2197 | 0.115  |
| 2200 | 0.061  |
| 2211 | 0.058  |
| 2234 | 0.153  |
| 2235 | 0.153  |
| 2243 | 0.035  |
| 2257 | 0.267  |
| 2288 | 0.045  |

|      |       |
|------|-------|
| 2293 | 0.829 |
| 2344 | 0.029 |
| 2366 | 0.195 |
| 2367 | 0.68  |
| 2382 | 0.267 |
| 2386 | 0.311 |
| 2387 | 0.207 |
| 2450 | 0.962 |
| 2462 | 0.877 |
| 2463 | 0.121 |
| 2486 | 0.036 |
| 2525 | 0.035 |
| 2555 | 0.041 |
| 2586 | 0.029 |
| 2606 | 0.036 |
| 2622 | 0.138 |
| 2671 | 0.05  |
| 2693 | 0.061 |
| 2794 | 0.051 |
| 2800 | 0.058 |
| 2827 | 0.121 |
| 2846 | 0.057 |
| 2858 | 0.052 |
| 2863 | 0.267 |
| 2904 | 0.207 |
| 2917 | 0.057 |
| 2936 | 0.596 |
| 2938 | 0.016 |
| 2952 | 0.013 |
| 2957 | 0.192 |
| 2966 | 0.458 |
| 2985 | 0.037 |
| 2986 | 0.057 |
| 2997 | 0.046 |
| 3043 | 0.813 |
| 3053 | 0.098 |
| 3064 | 0.22  |
| 3074 | 0.029 |
| 3077 | 0.036 |
| 3156 | 0.058 |
| 3165 | 2.808 |
| 3168 | 0.688 |
| 3170 | 0.045 |
| 3182 | 0.103 |
| 3183 | 0.596 |

|      |       |
|------|-------|
| 3185 | 0.057 |
| 3216 | 0.061 |
| 3239 | 0.197 |
| 3266 | 0.103 |
| 3311 | 0.326 |
| 3313 | 0.028 |
| 3316 | 0.029 |
| 3326 | 0.433 |
| 3378 | 0.046 |
| 3409 | 0.307 |
| 3416 | 0.311 |
| 3421 | 0.207 |
| 3431 | 0.045 |
| 3432 | 0.115 |
| 3435 | 0.058 |
| 3490 | 0.032 |
| 3496 | 0.045 |
| 3522 | 0.101 |
| 3597 | 0.057 |
| 3599 | 0.098 |
| 3644 | 0.29  |
| 3653 | 1.219 |
| 3698 | 0.115 |
| 3710 | 0.307 |
| 3713 | 0.058 |
| 3724 | 0.058 |
| 3777 | 0.032 |
| 3794 | 0.118 |
| 3817 | 0.118 |
| 3852 | 0.311 |
| 3897 | 0.532 |
| 3901 | 0.098 |
| 3903 | 0.95  |
| 3919 | 0.046 |
| 3935 | 0.307 |
| 3958 | 0.076 |
| 3972 | 0.045 |
| 3974 | 0.577 |
| 4016 | 0.118 |
| 4043 | 9.402 |
| 4045 | 0.115 |
| 4095 | 0.158 |
| 4114 | 0.29  |
| 4115 | 0.29  |
| 4118 | 0.596 |

|      |        |
|------|--------|
| 4186 | 0.028  |
| 4196 | 2.107  |
| 4216 | 0.098  |
| 4266 | 0.046  |
| 4280 | 0.055  |
| 4298 | 0.057  |
| 4309 | 0.057  |
| 4320 | 0.453  |
| 4368 | 0.326  |
| 4369 | 0.057  |
| 4469 | 0.095  |
| 4476 | 0.371  |
| 4477 | 0.371  |
| 4506 | 0.207  |
| 4556 | 0.058  |
| 4564 | 0.095  |
| 4565 | 0.095  |
| 4600 | 0.877  |
| 4607 | 0.877  |
| 4625 | 0.207  |
| 4631 | 0.057  |
| 4633 | 0.877  |
| 4648 | 0.061  |
| 4671 | 0.051  |
| 4682 | 0.037  |
| 4690 | 0.032  |
| 4691 | 11.573 |
| 4692 | 0.057  |
| 4693 | 0.633  |
| 4710 | 0.023  |
| 4713 | 0.829  |
| 4731 | 0.016  |
| 4762 | 0.061  |
| 4781 | 0.05   |
| 4805 | 0.038  |
| 4806 | 0.311  |
| 4823 | 0.115  |
| 4834 | 0.406  |
| 4880 | 0.207  |
| 4911 | 0.048  |
| 4950 | 0.044  |
| 4965 | 0.307  |
| 4999 | 0.406  |
| 5025 | 70.239 |
| 5028 | 0.541  |



|      |       |
|------|-------|
| 5048 | 6.731 |
| 5079 | 7.562 |
| 5080 | 0.718 |
| 5085 | 0.057 |
| 5137 | 0.315 |
| 5138 | 0.158 |
| 5169 | 0.541 |
| 5173 | 0.184 |
| 5175 | 0.359 |
| 5200 | 0.057 |
| 5221 | 0.104 |
| 5239 | 1.343 |
| 5243 | 0.058 |
| 5254 | 0.718 |
| 5257 | 0.406 |
| 5266 | 0.517 |
| 5268 | 0.098 |
| 5323 | 0.028 |
| 5339 | 0.059 |
| 5401 | 0.076 |
| 5407 | 0.453 |
| 5455 | 0.517 |
| 5482 | 0.684 |
| 5487 | 0.633 |
| 5535 | 0.633 |
| 5555 | 0.633 |
| 5563 | 0.262 |
| 5575 | 0.633 |
| 5585 | 0.461 |
| 5599 | 0.461 |
| 5648 | 0.057 |
| 5651 | 7.04  |
| 5652 | 0.5   |
| 5657 | 9.402 |
| 5664 | 0.166 |
| 5665 | 0.633 |
| 5668 | 7.562 |
| 5670 | 7.562 |
| 5681 | 0.046 |
| 5696 | 6.348 |
| 5697 | 6.609 |
| 5714 | 0.166 |
| 5767 | 0.061 |
| 5812 | 0.82  |
| 5833 | 4.409 |

|      |        |
|------|--------|
| 5840 | 0.633  |
| 5843 | 0.461  |
| 5896 | 0.061  |
| 5936 | 3.95   |
| 5938 | 0.861  |
| 5955 | 0.058  |
| 5991 | 0.586  |
| 6002 | 0.046  |
| 6035 | 0.052  |
| 6040 | 5.928  |
| 6056 | 0.886  |
| 6115 | 0.603  |
| 6153 | 0.406  |
| 6181 | 7.9    |
| 6208 | 0.603  |
| 6210 | 0.886  |
| 6215 | 0.541  |
| 6225 | 0.59   |
| 6226 | 45.472 |
| 6231 | 70.239 |
| 6232 | 0.262  |
| 6234 | 0.196  |
| 6249 | 0.195  |
| 6269 | 0.262  |
| 6298 | 9.402  |
| 6304 | 0.072  |
| 6312 | 0.035  |
| 6366 | 0.5    |
| 6414 | 3.025  |
| 6435 | 0.603  |
| 6458 | 7.562  |
| 6459 | 7.562  |
| 6464 | 0.718  |
| 6498 | 0.82   |
| 6547 | 0.378  |
| 6557 | 0.229  |
| 6558 | 0.155  |
| 6571 | 2.107  |
| 6584 | 1.15   |
| 6608 | 0.945  |
| 6609 | 1.928  |
| 6631 | 1.15   |
| 6699 | 1.195  |
| 6708 | 1.93   |
| 6736 | 0.262  |

|      |        |
|------|--------|
| 6769 | 0.229  |
| 6790 | 0.229  |
| 6853 | 0.061  |
| 6879 | 3.95   |
| 6881 | 0.603  |
| 6886 | 0.051  |
| 6892 | 0.939  |
| 6917 | 5.928  |
| 6936 | 1.15   |
| 6948 | 3.578  |
| 6949 | 1.15   |
| 6999 | 1.138  |
| 7005 | 1.15   |
| 7058 | 0.016  |
| 7063 | 0.877  |
| 7072 | 0.038  |
| 7082 | 3.598  |
| 7104 | 0.058  |
| 7107 | 6.731  |
| 7114 | 4.315  |
| 7126 | 2.518  |
| 7141 | 0.061  |
| 7167 | 0.229  |
| 7197 | 0.192  |
| 7205 | 0.058  |
| 7208 | 1.138  |
| 7209 | 1.15   |
| 7236 | 7.888  |
| 7238 | 14.365 |
| 7261 | 0.061  |
| 7275 | 0.945  |
| 7334 | 4.4    |
| 7372 | 0.945  |
| 7389 | 0.945  |
| 7394 | 1.15   |
| 7397 | 9.402  |
| 7406 | 0.461  |
| 7428 | 0.059  |
| 7432 | 0.381  |
| 7434 | 0.532  |
| 7450 | 0.862  |
| 7457 | 0.492  |
| 7469 | 0.107  |
| 7488 | 0.118  |
| 7489 | 0.029  |

|      |        |
|------|--------|
| 7490 | 0.195  |
| 7499 | 0.057  |
| 7517 | 0.166  |
| 7518 | 0.057  |
| 7520 | 0.877  |
| 7524 | 0.307  |
| 7534 | 0.057  |
| 7535 | 0.057  |
| 7538 | 0.34   |
| 7542 | 0.057  |
| 7555 | 4.4    |
| 7667 | 0.158  |
| 7677 | 0.596  |
| 7678 | 0.95   |
| 7692 | 70.239 |
| 7729 | 0.633  |
| 7751 | 0.036  |
| 7780 | 0.596  |
| 7840 | 0.488  |
| 7849 | 8.543  |
| 7875 | 0.192  |
| 7913 | 0.267  |
| 7999 | 2.297  |
| 8017 | 0.22   |
| 8039 | 1.276  |
| 8040 | 3.028  |
| 8062 | 0.207  |
| 8075 | 0.964  |
| 8139 | 0.877  |
| 8233 | 0.057  |
| 8246 | 0.057  |
| 8329 | 0.057  |
| 8332 | 0.037  |
| 8335 | 0.058  |
| 8375 | 0.68   |
| 8385 | 0.488  |
| 8401 | 0.048  |
| 8416 | 0.541  |
| 8447 | 0.197  |
| 8451 | 0.326  |
| 8456 | 0.093  |
| 8493 | 0.773  |
| 8510 | 0.061  |
| 8600 | 0.307  |
| 8640 | 0.95   |

|      |        |
|------|--------|
| 8663 | 0.098  |
| 8672 | 0.307  |
| 8726 | 0.032  |
| 8735 | 4.315  |
| 8740 | 0.192  |
| 8789 | 0.311  |
| 8822 | 0.371  |
| 8831 | 0.035  |
| 8866 | 0.235  |
| 8876 | 0.262  |
| 8878 | 0.032  |
| 8882 | 0.052  |
| 8969 | 0.136  |
| 9001 | 2.595  |
| 9012 | 4.409  |
| 9044 | 0.057  |
| 9053 | 37.365 |
| 9129 | 0.057  |
| 9137 | 0.262  |
| 9163 | 0.107  |
| 9183 | 0.586  |
| 9201 | 0.061  |
| 9209 | 0.155  |
| 9222 | 0.207  |
| 9231 | 0.029  |
| 9239 | 0.029  |
| 9271 | 1.38   |
| 9275 | 0.196  |
| 9313 | 0.155  |
| 9325 | 0.513  |
| 9329 | 0.877  |
| 9330 | 0.315  |
| 9331 | 0.513  |
| 9332 | 0.375  |
| 9337 | 0.192  |
| 9342 | 0.371  |
| 9371 | 1.041  |
| 9381 | 0.787  |
| 9389 | 0.046  |
| 9396 | 0.29   |
| 9421 | 0.036  |
| 9432 | 0.057  |
| 9439 | 9.402  |
| 9457 | 0.057  |
| 9460 | 0.057  |

|       |       |
|-------|-------|
| 9462  | 0.057 |
| 9465  | 0.311 |
| 9474  | 0.161 |
| 9476  | 0.058 |
| 9484  | 0.371 |
| 9500  | 0.207 |
| 9516  | 0.058 |
| 9557  | 0.166 |
| 9562  | 0.044 |
| 9602  | 0.055 |
| 9615  | 0.158 |
| 9630  | 0.052 |
| 9637  | 0.184 |
| 9672  | 0.586 |
| 9688  | 0.207 |
| 9712  | 0.028 |
| 9728  | 0.013 |
| 9736  | 0.262 |
| 9739  | 0.29  |
| 9742  | 0.057 |
| 9785  | 0.058 |
| 9822  | 0.861 |
| 9855  | 0.058 |
| 9874  | 1.928 |
| 9886  | 0.057 |
| 9914  | 0.028 |
| 9917  | 0.058 |
| 9927  | 1.93  |
| 9928  | 3.025 |
| 9945  | 0.235 |
| 9960  | 0.371 |
| 9966  | 0.59  |
| 9973  | 0.461 |
| 10007 | 0.042 |
| 10021 | 3.578 |
| 10023 | 0.107 |
| 10033 | 0.136 |
| 10077 | 0.378 |
| 10122 | 0.041 |
| 10149 | 0.057 |
| 10169 | 0.307 |
| 10176 | 0.058 |
| 10178 | 0.058 |
| 10189 | 1.15  |
| 10196 | 0.058 |

|       |        |
|-------|--------|
| 10205 | 7.888  |
| 10209 | 0.057  |
| 10226 | 0.058  |
| 10239 | 1.301  |
| 10265 | 0.061  |
| 10295 | 0.153  |
| 10309 | 1.219  |
| 10325 | 0.158  |
| 10336 | 0.381  |
| 10509 | 0.862  |
| 10558 | 0.076  |
| 10582 | 0.057  |
| 10583 | 0.862  |
| 10589 | 0.095  |
| 10602 | 0.058  |
| 10625 | 0.688  |
| 10631 | 0.046  |
| 10678 | 0.095  |
| 10701 | 0.057  |
| 10730 | 0.046  |
| 10748 | 0.058  |
| 10769 | 1.044  |
| 10785 | 0.166  |
| 10792 | 0.057  |
| 10866 | 1.361  |
| 10917 | 0.311  |
| 10922 | 11.573 |
| 10925 | 1.92   |
| 10978 | 0.076  |
| 10993 | 0.029  |
| 11009 | 0.057  |
| 11101 | 0.046  |
| 11129 | 45.472 |
| 11168 | 0.311  |
| 11215 | 0.076  |
| 11250 | 0.058  |
| 11275 | 0.865  |
| 11322 | 0.207  |
| 11325 | 0.057  |
| 11342 | 0.633  |
| 11405 | 0.461  |
| 11461 | 0.166  |
| 11466 | 0.153  |
| 11471 | 0.865  |
| 11495 | 0.307  |

|       |       |
|-------|-------|
| 11522 | 0.603 |
| 11540 | 0.603 |
| 11549 | 0.473 |
| 11550 | 0.057 |
| 11554 | 0.057 |
| 11559 | 0.046 |
| 11584 | 7.9   |
| 11614 | 0.058 |
| 11665 | 0.058 |
| 11698 | 0.192 |
| 11722 | 0.08  |
| 11734 | 0.046 |
| 11746 | 0.792 |
| 11748 | 1.08  |
| 11755 | 0.262 |
| 11801 | 1.92  |
| 11807 | 0.057 |
| 11837 | 0.59  |
| 11838 | 1.276 |
| 11843 | 6.506 |
| 11907 | 0.166 |
| 11942 | 0.118 |
| 11961 | 0.057 |
| 11963 | 0.035 |
| 11970 | 0.035 |
| 11971 | 0.633 |
| 11980 | 0.048 |
| 11982 | 2.518 |
| 11986 | 0.029 |
| 11995 | 0.433 |
| 11999 | 0.433 |
| 12000 | 0.433 |
| 12020 | 2.595 |
| 12075 | 0.577 |
| 12122 | 0.135 |
| 12171 | 0.057 |
| 12219 | 4.409 |
| 12353 | 0.95  |
| 12394 | 0.877 |
| 12447 | 0.877 |
| 12549 | 0.596 |
| 12591 | 0.371 |
| 12602 | 0.046 |
| 12604 | 0.586 |
| 12709 | 0.057 |



|       |        |
|-------|--------|
| 12776 | 0.061  |
| 12889 | 0.262  |
| 12900 | 0.192  |
| 12992 | 0.057  |
| 13031 | 0.22   |
| 13076 | 6.506  |
| 13083 | 0.061  |
| 13114 | 0.046  |
| 13117 | 0.192  |
| 13172 | 4.409  |
| 13225 | 4.409  |
| 13280 | 4.409  |
| 13300 | 14.365 |
| 13347 | 0.135  |
| 13380 | 0.684  |
| 13420 | 4.315  |
| 13459 | 0.064  |
| 13606 | 0.061  |
| 13627 | 0.045  |
| 13639 | 0.05   |
| 13711 | 0.262  |
| 13807 | 0.061  |
| 13813 | 0.046  |
| 13818 | 0.153  |
| 13893 | 0.057  |
| 13995 | 1.276  |
| 13997 | 0.586  |
| 14050 | 0.586  |
| 14063 | 0.586  |
| 14084 | 0.207  |
| 14085 | 0.311  |
| 14086 | 1.12   |
| 14156 | 0.633  |
| 14226 | 0.192  |
| 14333 | 0.048  |
| 14378 | 0.058  |
| 14385 | 0.057  |
| 14476 | 0.076  |
| 14490 | 0.046  |
| 14534 | 0.035  |
| 14541 | 0.262  |
| 14551 | 0.877  |
| 14570 | 0.061  |
| 14578 | 0.773  |
| 14602 | 0.128  |

|       |        |
|-------|--------|
| 14627 | 0.877  |
| 14672 | 0.207  |
| 14676 | 0.057  |
| 14678 | 0.311  |
| 14688 | 0.107  |
| 14707 | 0.311  |
| 14776 | 0.267  |
| 14785 | 0.057  |
| 14829 | 0.058  |
| 14884 | 0.603  |
| 14899 | 0.028  |
| 14900 | 11.573 |
| 14901 | 0.603  |
| 14912 | 0.057  |
| 14935 | 4.409  |
| 14964 | 0.058  |
| 15005 | 0.061  |
| 15023 | 0.115  |
| 15068 | 0.048  |
| 15104 | 0.098  |
| 15159 | 1.275  |
| 15180 | 0.098  |
| 15198 | 0.041  |
| 15201 | 0.057  |
| 15238 | 0.058  |
| 15286 | 0.813  |
| 15337 | 7.015  |
| 15339 | 0.235  |
| 15353 | 45.472 |
| 15361 | 6.915  |
| 15367 | 0.877  |
| 15501 | 0.195  |
| 15732 | 0.057  |
| 15767 | 0.061  |
| 15779 | 0.057  |
| 15781 | 0.787  |
| 15792 | 0.375  |
| 15793 | 4.315  |
| 15798 | 1.001  |
| 15815 | 0.5    |
| 15831 | 0.051  |
| 15845 | 0.058  |
| 15871 | 1.343  |
| 15930 | 0.061  |
| 15950 | 1.276  |

|       |       |
|-------|-------|
| 15964 | 0.371 |
| 16001 | 0.057 |
| 16039 | 0.057 |
| 16076 | 0.473 |
| 16096 | 0.057 |
| 16106 | 0.058 |
| 16112 | 0.877 |
| 16189 | 4.409 |
| 16192 | 0.057 |
| 16193 | 0.138 |
| 16194 | 0.326 |
| 16215 | 0.05  |
| 16221 | 0.076 |
| 16222 | 0.057 |
| 16225 | 0.311 |
| 16271 | 0.792 |
| 16272 | 0.311 |
| 16273 | 0.192 |
| 16286 | 0.207 |
| 16335 | 4.409 |
| 16395 | 0.541 |
| 16467 | 0.051 |
| 16473 | 0.153 |
| 16474 | 0.153 |
| 16509 | 1.15  |
| 16542 | 1.15  |
| 16592 | 0.057 |
| 16618 | 9.402 |
| 16818 | 0.057 |
| 17029 | 0.207 |
| 17030 | 0.207 |
| 17043 | 0.71  |
| 17068 | 0.061 |
| 17073 | 6.915 |
| 17124 | 0.311 |
| 17126 | 0.207 |
| 17128 | 0.057 |
| 17158 | 0.058 |
| 17165 | 0.098 |
| 17183 | 0.596 |
| 17201 | 0.098 |
| 17386 | 0.962 |
| 17398 | 4.409 |
| 17412 | 0.058 |
| 17491 | 0.207 |

|       |        |
|-------|--------|
| 17525 | 0.311  |
| 17532 | 0.311  |
| 17563 | 0.058  |
| 17564 | 0.104  |
| 17572 | 0.577  |
| 17671 | 1.128  |
| 17680 | 0.076  |
| 17733 | 0.098  |
| 17750 | 0.061  |
| 17754 | 0.095  |
| 17818 | 0.433  |
| 17863 | 1.044  |
| 17893 | 0.371  |
| 17896 | 1.128  |
| 17917 | 0.107  |
| 17926 | 0.057  |
| 17936 | 1.276  |
| 17943 | 0.262  |
| 17998 | 0.058  |
| 18151 | 0.603  |
| 18166 | 1.276  |
| 18174 | 7.04   |
| 18196 | 0.016  |
| 18211 | 0.386  |
| 18221 | 0.038  |
| 18234 | 0.076  |
| 18342 | 0.036  |
| 18364 | 0.048  |
| 18371 | 0.311  |
| 18441 | 1.195  |
| 18448 | 0.158  |
| 18491 | 0.458  |
| 18527 | 0.048  |
| 18560 | 42.859 |
| 18566 | 4.409  |
| 18647 | 0.813  |
| 18656 | 0.046  |
| 18662 | 0.076  |
| 18700 | 0.192  |
| 18734 | 0.586  |
| 18792 | 0.235  |
| 18798 | 0.057  |
| 18799 | 1.343  |
| 18800 | 0.59   |
| 18801 | 0.586  |

|       |       |
|-------|-------|
| 18812 | 0.057 |
| 18820 | 0.016 |
| 18881 | 0.046 |
| 18921 | 0.076 |
| 18922 | 0.058 |
| 19007 | 0.098 |
| 19036 | 0.057 |
| 19046 | 0.048 |
| 19092 | 0.5   |
| 19116 | 0.458 |
| 19139 | 0.058 |
| 19146 | 8.77  |
| 19206 | 0.058 |
| 19291 | 0.262 |
| 19317 | 0.057 |
| 19320 | 0.307 |
| 19382 | 0.207 |
| 19398 | 0.061 |
| 19449 | 0.192 |
| 19471 | 0.371 |
| 19477 | 0.586 |
| 19575 | 0.057 |
| 19764 | 0.057 |
| 19779 | 0.035 |
| 19954 | 1.902 |
| 19972 | 1.902 |
| 19993 | 0.29  |
| 20005 | 4.409 |
| 20026 | 0.036 |
| 20036 | 1.275 |
| 20059 | 0.267 |
| 20068 | 0.028 |
| 20105 | 0.076 |
| 20116 | 0.058 |
| 20127 | 0.057 |
| 20310 | 0.046 |
| 20384 | 0.311 |
| 20385 | 0.098 |
| 20386 | 0.326 |
| 20395 | 0.207 |
| 20403 | 0.877 |
| 20442 | 0.061 |
| 20565 | 0.057 |
| 20571 | 0.773 |
| 20621 | 0.207 |

|       |       |
|-------|-------|
| 20650 | 0.877 |
| 20783 | 0.192 |
| 20805 | 0.207 |
| 20815 | 0.262 |
| 20967 | 0.061 |
| 20978 | 0.057 |
| 21045 | 0.048 |
| 21050 | 0.433 |
| 21081 | 0.035 |
| 21113 | 0.044 |
| 21123 | 0.307 |
| 21229 | 0.877 |
| 21251 | 0.058 |
| 21256 | 0.046 |
| 21275 | 1.001 |
| 21285 | 2.854 |
| 21387 | 0.057 |
| 21397 | 1.08  |
| 21419 | 0.158 |
| 21421 | 0.166 |
| 21444 | 0.076 |
| 21562 | 0.013 |
| 21610 | 0.311 |
| 21673 | 0.057 |
| 21703 | 0.057 |
| 21745 | 0.052 |
| 21777 | 0.541 |
| 21797 | 0.541 |
| 21807 | 0.076 |
| 21811 | 0.057 |
| 21813 | 0.048 |
| 21815 | 0.098 |
| 21816 | 0.098 |
| 21821 | 0.098 |
| 21824 | 0.057 |
| 21831 | 0.023 |
| 21840 | 0.045 |
| 21843 | 0.115 |
| 21846 | 0.307 |
| 21864 | 0.121 |
| 21880 | 0.051 |
| 21947 | 0.406 |
| 21952 | 8.77  |
| 21955 | 0.813 |
| 22014 | 0.029 |

|       |       |
|-------|-------|
| 22024 | 0.046 |
| 22026 | 0.192 |
| 22066 | 6.731 |
| 22070 | 0.032 |
| 22206 | 0.166 |
| 22230 | 0.023 |
| 22288 | 0.028 |
| 22305 | 0.877 |
| 22380 | 1.236 |
| 22571 | 0.939 |
| 22690 | 1.041 |
| 22756 | 0.192 |
| 22764 | 0.058 |
| 23026 | 0.076 |
| 23060 | 1.276 |
| 23077 | 0.029 |
| 23114 | 0.029 |
| 23121 | 0.098 |
| 23158 | 0.16  |
| 23204 | 0.076 |
| 23323 | 0.098 |
| 23420 | 0.128 |
| 23425 | 0.057 |
| 23442 | 0.71  |
| 23617 | 0.877 |
| 23625 | 0.406 |
| 23716 | 0.058 |
| 23795 | 1.761 |
| 23840 | 0.058 |
| 23952 | 0.058 |
| 23981 | 0.406 |
| 24000 | 0.058 |
| 24007 | 0.098 |
| 24020 | 0.045 |
| 24075 | 0.058 |
| 24086 | 0.061 |
| 24108 | 7.562 |
| 24121 | 0.076 |
| 24122 | 0.057 |
| 24125 | 0.057 |
| 24128 | 0.076 |
| 24133 | 0.058 |
| 24134 | 0.036 |
| 24137 | 0.061 |
| 24141 | 0.032 |

|       |        |
|-------|--------|
| 24145 | 0.036  |
| 24147 | 0.036  |
| 24152 | 0.032  |
| 24193 | 0.061  |
| 24212 | 0.05   |
| 24236 | 0.311  |
| 24305 | 0.048  |
| 24308 | 0.076  |
| 24320 | 0.05   |
| 24343 | 0.08   |
| 24356 | 0.136  |
| 24361 | 0.16   |
| 24383 | 0.29   |
| 24440 | 0.013  |
| 24453 | 0.586  |
| 24469 | 0.936  |
| 24531 | 0.577  |
| 24534 | 0.058  |
| 24584 | 1.128  |
| 24617 | 0.036  |
| 24640 | 8.543  |
| 24680 | 0.032  |
| 24682 | 0.577  |
| 24736 | 2.854  |
| 24828 | 0.057  |
| 24830 | 4.436  |
| 24867 | 0.458  |
| 24887 | 0.057  |
| 24947 | 0.058  |
| 24986 | 7.014  |
| 25109 | 0.058  |
| 25185 | 0.493  |
| 25199 | 6.348  |
| 25205 | 0.936  |
| 25257 | 0.057  |
| 25283 | 0.057  |
| 25329 | 0.076  |
| 25330 | 0.057  |
| 25341 | 0.045  |
| 25342 | 0.098  |
| 25358 | 0.057  |
| 25361 | 0.076  |
| 25362 | 0.076  |
| 25481 | 10.546 |
| 25514 | 0.057  |



|       |        |
|-------|--------|
| 25529 | 0.057  |
| 25619 | 0.048  |
| 25643 | 0.267  |
| 25701 | 0.813  |
| 25750 | 0.045  |
| 25790 | 0.076  |
| 25794 | 0.048  |
| 25800 | 0.936  |
| 25815 | 0.357  |
| 25833 | 1.044  |
| 25895 | 0.058  |
| 26021 | 7.014  |
| 26083 | 1.761  |
| 26095 | 0.048  |
| 26115 | 45.472 |
| 26133 | 0.058  |
| 26159 | 0.061  |
| 26165 | 0.057  |
| 26213 | 0.032  |
| 26216 | 0.098  |
| 26231 | 0.098  |
| 26234 | 0.121  |
| 26242 | 0.045  |
| 26247 | 0.064  |
| 26277 | 0.013  |
| 26283 | 0.046  |
| 26284 | 0.586  |
| 26291 | 0.877  |
| 26336 | 0.792  |
| 26351 | 0.207  |
| 26522 | 0.064  |
| 26575 | 0.161  |
| 26631 | 0.311  |
| 26746 | 0.058  |
| 26888 | 0.311  |
| 26908 | 6.609  |
| 26967 | 0.877  |
| 26970 | 0.936  |
| 26986 | 0.541  |
| 26988 | 0.058  |
| 27008 | 0.037  |
| 27013 | 0.813  |
| 27055 | 0.057  |
| 27058 | 0.371  |
| 27064 | 0.877  |

|       |        |
|-------|--------|
| 27082 | 0.433  |
| 27197 | 0.877  |
| 27200 | 0.311  |
| 27362 | 0.311  |
| 27366 | 0.098  |
| 27441 | 0.633  |
| 27446 | 0.877  |
| 27452 | 0.058  |
| 27454 | 0.072  |
| 27459 | 0.058  |
| 27484 | 0.16   |
| 27490 | 0.16   |
| 27591 | 0.406  |
| 27677 | 0.829  |
| 27749 | 1.301  |
| 27778 | 0.036  |
| 27782 | 0.048  |
| 27783 | 0.048  |
| 27784 | 0.058  |
| 27785 | 0.051  |
| 27856 | 0.877  |
| 27968 | 0.048  |
| 28168 | 0.057  |
| 28172 | 0.166  |
| 28189 | 11.573 |
| 28211 | 0.028  |
| 28255 | 0.045  |
| 28256 | 0.057  |
| 28328 | 0.013  |
| 28332 | 0.577  |
| 28344 | 0.058  |
| 28346 | 0.058  |
| 28348 | 0.057  |
| 28390 | 0.076  |
| 28421 | 0.633  |
| 28479 | 0.166  |
| 28553 | 0.057  |
| 28598 | 0.107  |
| 28636 | 0.877  |
| 28695 | 0.121  |
| 28711 | 4.315  |
| 28712 | 0.029  |
| 28713 | 0.34   |
| 28728 | 0.792  |
| 28764 | 0.311  |

|       |       |
|-------|-------|
| 28780 | 0.041 |
| 28784 | 0.057 |
| 28816 | 0.098 |
| 28878 | 0.877 |
| 28888 | 0.057 |
| 28900 | 0.061 |
| 28955 | 0.058 |
| 29014 | 2.808 |
| 29020 | 1.276 |
| 29037 | 0.311 |
| 29068 | 0.048 |
| 29181 | 0.207 |
| 29232 | 0.061 |
| 29304 | 1.128 |
| 29316 | 0.048 |
| 29324 | 0.473 |
| 29330 | 0.057 |
| 29332 | 0.936 |
| 29342 | 0.058 |
| 29345 | 0.936 |
| 29352 | 0.936 |
| 29373 | 0.057 |
| 29426 | 0.71  |
| 29455 | 0.311 |
| 29465 | 0.307 |
| 29480 | 6.915 |
| 29488 | 0.058 |
| 29500 | 4.315 |
| 29524 | 0.098 |
| 29577 | 7.015 |
| 29587 | 0.048 |
| 29704 | 0.057 |
| 29749 | 0.057 |
| 29772 | 0.813 |
| 29860 | 0.046 |
| 29898 | 0.633 |
| 29951 | 1.343 |
| 30021 | 0.057 |
| 30049 | 15    |
| 30070 | 0.058 |
| 30123 | 0.058 |
| 30164 | 0.166 |
| 30165 | 0.107 |
| 30168 | 0.045 |
| 30243 | 0.057 |

|       |       |
|-------|-------|
| 30252 | 0.633 |
| 30282 | 0.207 |
| 30295 | 0.107 |
| 30297 | 0.057 |
| 30327 | 0.813 |
| 30382 | 0.057 |
| 30389 | 0.023 |
| 30391 | 0.064 |
| 30444 | 0.041 |
| 30514 | 3.028 |
| 30531 | 0.013 |
| 30556 | 0.058 |
| 30698 | 7.562 |
| 30724 | 0.936 |
| 30761 | 0.235 |
| 30790 | 0.207 |
| 30806 | 0.057 |
| 30811 | 0.166 |
| 30849 | 0.207 |
| 30892 | 0.936 |
| 30923 | 0.311 |
| 30942 | 0.057 |
| 30954 | 0.877 |
| 30966 | 0.877 |
| 30982 | 0.098 |
| 30984 | 0.877 |
| 30994 | 0.877 |
| 31033 | 4.315 |
| 31053 | 3.598 |
| 31054 | 0.061 |
| 31064 | 0.577 |
| 31105 | 0.541 |
| 31107 | 0.406 |
| 31151 | 0.058 |
| 31155 | 0.058 |
| 31178 | 0.036 |
| 31196 | 0.058 |
| 31253 | 0.71  |
| 31257 | 0.058 |
| 31383 | 0.207 |
| 31429 | 0.045 |
| 31452 | 0.051 |
| 31469 | 0.098 |
| 31482 | 0.057 |
| 31540 | 5.06  |

|       |       |
|-------|-------|
| 31577 | 0.051 |
| 31582 | 0.862 |
| 31584 | 0.862 |
| 31589 | 0.207 |
| 31650 | 4.409 |
| 31700 | 0.038 |
| 31734 | 1.08  |
| 31777 | 0.307 |
| 31787 | 0.207 |
| 31871 | 0.057 |
| 31885 | 0.71  |
| 31894 | 0.057 |
| 31916 | 0.433 |
| 31935 | 0.962 |
| 31943 | 0.051 |
| 31944 | 0.076 |
| 31945 | 0.098 |
| 31950 | 0.057 |
| 31959 | 0.05  |
| 31960 | 4.315 |
| 31962 | 0.813 |
| 32090 | 0.064 |
| 32093 | 0.877 |
| 32097 | 0.076 |
| 32100 | 0.098 |
| 32105 | 0.064 |
| 32108 | 0.076 |
| 32136 | 0.057 |
| 32163 | 0.058 |
| 32165 | 0.046 |
| 32227 | 0.813 |
| 32234 | 0.064 |
| 32237 | 0.013 |
| 32242 | 0.048 |
| 32365 | 0.048 |
| 32366 | 0.057 |
| 32425 | 3.025 |
| 32436 | 0.057 |
| 32439 | 0.036 |
| 32450 | 1.08  |
| 32509 | 0.057 |
| 32519 | 0.877 |
| 32520 | 0.046 |
| 32536 | 0.076 |
| 32554 | 0.877 |

|       |       |
|-------|-------|
| 32601 | 0.311 |
| 32626 | 0.877 |
| 32641 | 0.061 |
| 32688 | 7.562 |
| 32692 | 0.058 |
| 32766 | 1.236 |
| 32831 | 0.71  |
| 32839 | 0.058 |
| 32854 | 0.207 |
| 32862 | 0.936 |
| 32875 | 0.048 |
| 32891 | 0.877 |
| 32897 | 7.562 |
| 32916 | 0.207 |
| 32926 | 0.041 |
| 32970 | 0.058 |
| 32993 | 2.107 |
| 33060 | 0.058 |
| 33068 | 1.128 |
| 33090 | 0.032 |
| 33104 | 0.058 |
| 33111 | 0.045 |
| 33113 | 0.05  |
| 33133 | 4.409 |
| 33180 | 0.813 |
| 33260 | 0.057 |
| 33318 | 0.05  |
| 33321 | 0.05  |
| 33340 | 0.877 |
| 33357 | 0.057 |
| 33386 | 0.877 |
| 33457 | 0.057 |
| 33475 | 1.7   |
| 33559 | 0.057 |
| 33568 | 0.813 |
| 33589 | 0.048 |
| 33614 | 0.058 |
| 33624 | 0.037 |
| 33643 | 0.058 |
| 33645 | 0.207 |
| 33647 | 0.877 |
| 33653 | 0.058 |
| 33654 | 0.044 |
| 33666 | 0.058 |
| 33669 | 0.057 |

|       |       |
|-------|-------|
| 33679 | 0.058 |
| 33687 | 0.877 |
| 33688 | 0.051 |
| 33704 | 0.936 |
| 33710 | 0.058 |
| 33743 | 0.107 |
| 33781 | 4.409 |
| 33785 | 0.057 |
| 33801 | 0.023 |
| 33826 | 0.058 |
| 33832 | 0.013 |
| 33838 | 0.877 |
| 33935 | 0.048 |
| 33961 | 0.051 |
| 33994 | 0.076 |
| 33995 | 0.877 |
| 34008 | 0.044 |
| 34022 | 0.877 |
| 34065 | 0.406 |
| 34073 | 0.633 |
| 34090 | 0.057 |
| 34091 | 0.076 |
| 34107 | 0.037 |
| 34129 | 0.036 |
| 34143 | 0.453 |
| 34152 | 0.057 |
| 34164 | 0.058 |
| 34172 | 0.057 |
| 34176 | 0.057 |
| 34182 | 0.037 |
| 34190 | 0.076 |
| 34197 | 0.036 |
| 34199 | 1.761 |
| 34209 | 0.058 |
| 34212 | 0.207 |
| 34218 | 0.076 |
| 34224 | 0.035 |
| 34229 | 0.058 |
| 34235 | 0.029 |
| 34251 | 0.032 |
| 34257 | 0.058 |
| 34260 | 0.29  |
| 34264 | 0.051 |
| 34266 | 0.029 |
| 34271 | 0.311 |

|       |       |
|-------|-------|
| 34274 | 0.037 |
| 34281 | 0.541 |
| 34289 | 0.045 |
| 34290 | 0.045 |
| 34305 | 0.058 |
| 34319 | 0.877 |
| 34348 | 0.038 |
| 34349 | 0.877 |
| 34350 | 0.058 |
| 34354 | 0.057 |
| 34359 | 0.048 |
| 34362 | 0.076 |
| 34373 | 0.057 |
| 34383 | 0.051 |
| 34396 | 0.058 |
| 34397 | 0.877 |
| 34401 | 0.032 |
| 34409 | 0.058 |
| 34422 | 0.046 |
| 34425 | 0.048 |
| 34437 | 0.057 |
| 34438 | 0.023 |
| 34440 | 0.044 |
| 34444 | 0.038 |
| 34447 | 0.057 |
| 34468 | 0.877 |
| 34474 | 0.036 |
| 34477 | 0.633 |
| 34487 | 0.057 |
| 34489 | 7.562 |
| 34495 | 0.058 |
| 34497 | 0.058 |
| 34500 | 0.058 |
| 34503 | 0.036 |
| 34506 | 0.042 |
| 34518 | 0.058 |
| 34521 | 0.046 |
| 34527 | 0.057 |
| 34536 | 0.048 |
| 34546 | 0.877 |
| 34550 | 0.048 |
| 34552 | 0.051 |
| 34554 | 0.877 |
| 34570 | 0.046 |
| 34579 | 0.044 |



|       |       |
|-------|-------|
| 34595 | 0.064 |
| 34597 | 0.877 |
| 34606 | 0.042 |
| 34610 | 0.098 |
| 34616 | 0.052 |
| 34621 | 0.057 |
| 34634 | 0.037 |
| 34639 | 0.046 |
| 34662 | 0.044 |
| 34663 | 0.936 |
| 34667 | 0.051 |
| 34669 | 0.058 |
| 34670 | 0.045 |
| 34678 | 0.877 |
| 34700 | 0.877 |
| 34716 | 0.072 |
| 34718 | 0.029 |
| 34725 | 0.103 |
| 34729 | 0.048 |
| 34730 | 0.044 |
| 34731 | 0.032 |
| 34737 | 0.041 |
| 34738 | 0.045 |
| 34743 | 0.098 |
| 34744 | 0.311 |
| 34757 | 0.048 |
| 34761 | 0.877 |
| 34769 | 0.098 |
| 34771 | 4.409 |
| 34782 | 0.036 |
| 34784 | 0.058 |
| 34786 | 7.562 |
| 34787 | 7.562 |
| 34789 | 0.051 |
| 34793 | 0.023 |
| 34808 | 0.046 |
| 34815 | 0.058 |
| 34840 | 0.051 |
| 34845 | 0.051 |
| 34850 | 0.098 |
| 34858 | 0.058 |
| 34861 | 0.029 |
| 34865 | 0.058 |
| 34889 | 0.048 |
| 34898 | 0.023 |

|       |       |
|-------|-------|
| 34910 | 0.064 |
| 34911 | 0.057 |
| 34916 | 0.032 |
| 34920 | 0.041 |
| 34922 | 0.098 |
| 34923 | 0.045 |
| 34924 | 0.023 |
| 34931 | 0.057 |
| 34939 | 0.041 |
| 34946 | 0.104 |
| 34954 | 0.058 |
| 34961 | 0.098 |
| 34968 | 0.058 |
| 34977 | 0.098 |
| 34980 | 0.057 |
| 35038 | 3.025 |
| 35085 | 3.025 |
| 35093 | 4.409 |
| 35169 | 0.886 |
| 35170 | 0.378 |
| 35255 | 4.409 |
| 35265 | 0.016 |
| 35269 | 0.492 |
| 35292 | 0.057 |
| 35330 | 0.493 |
| 35341 | 3.025 |
| 35347 | 0.29  |
| 35438 | 0.29  |
| 35506 | 1.128 |
| 35562 | 6.291 |
| 35651 | 0.541 |
| 35653 | 0.517 |
| 35656 | 0.29  |
| 35679 | 0.058 |
| 35681 | 0.378 |
| 35682 | 0.886 |
| 35711 | 0.076 |
| 35749 | 0.061 |
| 35792 | 0.057 |
| 35800 | 0.877 |
| 35806 | 0.29  |
| 35853 | 0.493 |
| 35890 | 0.057 |
| 35893 | 0.311 |
| 35935 | 0.035 |

|       |        |
|-------|--------|
| 35939 | 4.409  |
| 35965 | 0.058  |
| 35967 | 0.877  |
| 35968 | 3.598  |
| 36019 | 0.041  |
| 36035 | 0.792  |
| 36038 | 4.409  |
| 36040 | 11.573 |
| 36152 | 0.877  |
| 36211 | 6.731  |
| 36260 | 0.023  |
| 36329 | 0.061  |
| 36436 | 1.128  |
| 36472 | 0.862  |
| 36486 | 0.311  |
| 36488 | 0.051  |
| 36577 | 0.05   |
| 36597 | 0.057  |
| 36606 | 0.048  |
| 36608 | 0.051  |
| 36650 | 0.057  |
| 36697 | 0.541  |
| 36732 | 0.046  |
| 36754 | 0.058  |
| 36787 | 0.048  |
| 36873 | 0.046  |
| 36929 | 0.877  |
| 36945 | 0.877  |
| 36949 | 0.046  |
| 36993 | 0.051  |
| 36994 | 0.057  |
| 37002 | 0.057  |
| 37020 | 0.406  |
| 37021 | 0.541  |
| 37053 | 0.057  |
| 37094 | 0.057  |
| 37253 | 0.048  |
| 37291 | 0.041  |
| 37411 | 0.877  |
| 37507 | 1.128  |
| 37518 | 1.128  |
| 37553 | 0.048  |
| 37562 | 0.5    |
| 37587 | 0.5    |
| 37648 | 0.048  |

|       |        |
|-------|--------|
| 37688 | 0.603  |
| 37703 | 0.71   |
| 37719 | 11.573 |
| 37731 | 0.057  |
| 37750 | 0.307  |
| 37763 | 0.945  |
| 37779 | 3.598  |
| 37801 | 1.15   |
| 37816 | 0.057  |
| 37831 | 0.29   |
| 37850 | 0.061  |
| 37867 | 0.29   |
| 37904 | 0.058  |
| 37923 | 6.731  |
| 37928 | 2.518  |
| 37954 | 2.518  |
| 37960 | 6.731  |
| 37968 | 6.152  |
| 37972 | 0.061  |
| 37979 | 0.118  |
| 38013 | 0.962  |
| 38031 | 3.598  |
| 38032 | 0.058  |
| 38085 | 0.057  |
| 38088 | 0.057  |
| 38092 | 0.862  |
| 38103 | 0.962  |
| 38183 | 0.493  |
| 38196 | 0.541  |
| 38199 | 4.409  |
| 38293 | 1.15   |
| 38311 | 0.378  |
| 38323 | 0.877  |
| 38326 | 9.402  |
| 38332 | 0.057  |
| 38351 | 9.402  |
| 38363 | 0.057  |
| 38365 | 9.402  |
| 38430 | 0.041  |
| 38493 | 0.057  |
| 38511 | 0.045  |
| 38521 | 0.044  |
| 38527 | 0.061  |
| 38528 | 0.046  |
| 38553 | 11.573 |

|       |        |
|-------|--------|
| 38770 | 0.517  |
| 38817 | 0.158  |
| 38827 | 0.032  |
| 38874 | 0.865  |
| 38881 | 0.207  |
| 38943 | 0.877  |
| 38944 | 9.402  |
| 38948 | 0.311  |
| 38950 | 0.058  |
| 38956 | 0.541  |
| 38970 | 0.115  |
| 38976 | 15.077 |
| 38984 | 0.058  |
| 38992 | 0.207  |
| 39019 | 0.138  |
| 39084 | 11.573 |
| 39085 | 0.045  |
| 39104 | 6.915  |
| 39109 | 0.307  |
| 39145 | 0.596  |
| 39180 | 6.731  |
| 39215 | 0.86   |
| 39240 | 1.51   |
| 39251 | 3.598  |
| 39264 | 0.311  |
| 39317 | 0.098  |
| 39333 | 0.058  |
| 39340 | 0.058  |
| 39354 | 0.016  |
| 39362 | 15.077 |
| 39363 | 1.51   |
| 39437 | 0.013  |
| 39461 | 0.057  |
| 39469 | 9.085  |
| 39475 | 0.229  |
| 39477 | 0.229  |
| 39478 | 0.945  |
| 39481 | 0.058  |
| 39498 | 0.945  |
| 39502 | 0.057  |
| 39505 | 0.29   |
| 39518 | 9.085  |
| 39558 | 0.044  |
| 39590 | 6.506  |
| 39629 | 0.877  |

|       |       |
|-------|-------|
| 39647 | 0.877 |
| 39656 | 0.877 |
| 39693 | 1.291 |
| 39708 | 0.603 |
| 39709 | 0.541 |
| 39722 | 0.158 |
| 39723 | 9.085 |
| 39746 | 9.085 |
| 39750 | 0.406 |
| 39756 | 6.506 |
| 39758 | 0.057 |
| 39798 | 0.29  |
| 39799 | 6.609 |
| 39811 | 0.541 |
| 39823 | 0.057 |
| 39842 | 0.197 |
| 39873 | 0.048 |
| 39876 | 0.603 |
| 39929 | 6.506 |
| 39934 | 0.058 |
| 39940 | 0.058 |
| 39987 | 7.04  |
| 40018 | 6.506 |
| 40058 | 0.29  |
| 40060 | 0.541 |
| 40061 | 0.406 |
| 40083 | 0.057 |
| 40086 | 0.057 |
| 40098 | 7.04  |
| 40107 | 0.058 |
| 40128 | 7.04  |
| 40141 | 0.433 |
| 40158 | 0.058 |
| 40159 | 0.107 |
| 40166 | 0.046 |
| 40185 | 0.813 |
| 40211 | 0.378 |
| 40212 | 0.886 |
| 40215 | 0.433 |
| 40239 | 0.962 |
| 40249 | 0.29  |
| 40253 | 0.098 |
| 40254 | 0.046 |
| 40336 | 0.135 |
| 40385 | 0.058 |

|       |        |
|-------|--------|
| 40394 | 0.048  |
| 40396 | 0.037  |
| 40401 | 0.045  |
| 40422 | 0.041  |
| 40434 | 6.348  |
| 40473 | 0.492  |
| 40484 | 0.433  |
| 40508 | 6.348  |
| 40516 | 0.057  |
| 40563 | 0.192  |
| 40576 | 7.04   |
| 40616 | 1.928  |
| 40645 | 1.928  |
| 40662 | 0.058  |
| 40663 | 0.051  |
| 40664 | 0.488  |
| 40688 | 3.025  |
| 40718 | 0.046  |
| 40752 | 3.025  |
| 40756 | 0.076  |
| 40785 | 1.93   |
| 40805 | 0.406  |
| 40883 | 0.406  |
| 40926 | 0.406  |
| 40940 | 4.995  |
| 40957 | 6.609  |
| 40961 | 1.93   |
| 41135 | 74.044 |
| 41161 | 9.402  |
| 41214 | 0.057  |
| 41259 | 0.051  |
| 41275 | 0.058  |
| 41276 | 0.058  |
| 41278 | 0.041  |
| 41286 | 4.995  |
| 41348 | 6.348  |
| 41364 | 0.433  |
| 41365 | 0.813  |
| 41366 | 0.433  |
| 41367 | 0.813  |
| 41407 | 0.877  |
| 41409 | 0.058  |
| 41414 | 0.029  |
| 41416 | 0.128  |
| 41450 | 0.433  |

|       |        |
|-------|--------|
| 41513 | 0.057  |
| 41521 | 0.061  |
| 41523 | 0.057  |
| 41524 | 0.064  |
| 41535 | 0.051  |
| 41550 | 0.71   |
| 41599 | 0.038  |
| 41608 | 0.013  |
| 41615 | 0.05   |
| 41621 | 0.307  |
| 41622 | 0.121  |
| 41623 | 0.307  |
| 41624 | 0.121  |
| 41668 | 0.166  |
| 41673 | 0.046  |
| 41674 | 0.166  |
| 41677 | 0.023  |
| 41680 | 0.029  |
| 41682 | 0.051  |
| 41701 | 0.098  |
| 41720 | 0.013  |
| 41722 | 7.562  |
| 41729 | 0.036  |
| 41817 | 0.076  |
| 41823 | 0.076  |
| 41974 | 4.409  |
| 41976 | 0.29   |
| 42003 | 0.076  |
| 42021 | 11.573 |
| 42074 | 0.396  |
| 42078 | 0.036  |
| 42094 | 0.862  |
| 42101 | 1.236  |
| 42108 | 0.057  |
| 42125 | 0.029  |
| 42201 | 0.058  |
| 42208 | 0.044  |
| 42213 | 0.058  |
| 42218 | 0.057  |
| 42280 | 0.155  |
| 42332 | 0.155  |
| 42345 | 0.877  |
| 42371 | 1.343  |
| 42380 | 0.046  |
| 42394 | 0.036  |



|       |       |
|-------|-------|
| 42397 | 0.057 |
| 42399 | 6.609 |
| 42406 | 0.057 |
| 42455 | 0.311 |
| 42500 | 0.433 |
| 42514 | 0.877 |
| 42538 | 6.348 |
| 42576 | 9.402 |
| 42590 | 9.402 |
| 42591 | 3.598 |
| 42604 | 0.577 |
| 42706 | 0.058 |
| 42708 | 0.458 |
| 42791 | 0.051 |
| 42792 | 0.057 |
| 42793 | 0.311 |
| 42798 | 0.406 |
| 42821 | 0.153 |
| 42834 | 1.343 |
| 42905 | 0.207 |
| 42913 | 7.562 |
| 42915 | 0.877 |
| 43028 | 0.877 |
| 43032 | 0.057 |
| 43045 | 0.057 |
| 43089 | 9.085 |
| 43096 | 0.061 |
| 43152 | 6.731 |
| 43198 | 0.046 |
| 43199 | 0.877 |
| 43233 | 0.058 |
| 43238 | 0.051 |
| 43244 | 0.051 |
| 43252 | 0.058 |
| 43260 | 0.914 |
| 43315 | 0.939 |
| 43414 | 0.058 |
| 43426 | 0.061 |
| 43441 | 0.041 |
| 43447 | 0.877 |
| 43456 | 0.048 |
| 43479 | 0.058 |
| 43504 | 0.057 |
| 43513 | 0.046 |
| 43536 | 0.877 |

|       |       |
|-------|-------|
| 43541 | 0.121 |
| 43550 | 0.038 |
| 43554 | 0.877 |
| 43616 | 0.539 |
| 43617 | 6.506 |
| 43652 | 0.586 |
| 43657 | 1.276 |
| 43766 | 0.057 |
| 43812 | 0.493 |
| 43891 | 0.877 |
| 43904 | 0.057 |
| 43911 | 0.098 |
| 44022 | 0.386 |
| 44112 | 0.158 |
| 44159 | 0.058 |
| 44187 | 0.104 |
| 44210 | 0.058 |
| 44232 | 210   |
| 44233 | 0.016 |
| 44258 | 0.877 |
| 44261 | 0.386 |
| 44313 | 0.061 |
| 44371 | 0.406 |
| 44483 | 0.048 |
| 44487 | 2.518 |
| 44703 | 0.121 |
| 44730 | 0.061 |
| 44800 | 0.098 |
| 44837 | 6.731 |
| 44867 | 0.862 |
| 44924 | 0.051 |
| 44986 | 0.098 |
| 45092 | 6.506 |
| 45145 | 0.061 |
| 45213 | 1.225 |
| 45216 | 0.048 |
| 45231 | 0.877 |
| 45233 | 0.032 |
| 45242 | 0.032 |
| 45256 | 0.061 |
| 45259 | 0.058 |
| 45262 | 0.453 |
| 45276 | 0.877 |
| 45298 | 0.058 |
| 45320 | 0.057 |

|       |        |
|-------|--------|
| 45325 | 0.458  |
| 45331 | 0.057  |
| 45348 | 0.029  |
| 45349 | 2.107  |
| 45439 | 9.085  |
| 45460 | 11.573 |
| 45549 | 3.598  |
| 45598 | 74.044 |
| 45645 | 0.029  |
| 45649 | 0.029  |
| 45736 | 0.371  |
| 45745 | 1.361  |
| 45766 | 2.723  |
| 45788 | 0.681  |
| 45790 | 0.681  |
| 45800 | 1.779  |
| 45811 | 0.445  |
| 45814 | 0.158  |
| 45827 | 1.361  |
| 45830 | 5.447  |
| 45842 | 0.098  |
| 45894 | 9.085  |
| 45929 | 2.723  |
| 45936 | 0.445  |
| 45982 | 0.445  |
| 46018 | 0.89   |
| 46019 | 1.334  |
| 46020 | 0.89   |
| 46021 | 0.445  |
| 46022 | 0.667  |
| 46141 | 0.057  |
| 46159 | 1.334  |
| 46187 | 5.447  |
| 46279 | 0.541  |
| 46342 | 0.016  |
| 46354 | 7.04   |
| 46440 | 0.098  |
| 46461 | 0.667  |
| 46511 | 0.058  |
| 46544 | 0.058  |
| 46555 | 6.609  |
| 46559 | 2.518  |
| 46560 | 6.731  |
| 46578 | 1.128  |
| 46587 | 0.29   |

|       |        |
|-------|--------|
| 46633 | 0.058  |
| 46638 | 0.057  |
| 46643 | 0.406  |
| 46657 | 9.402  |
| 46658 | 11.573 |
| 46659 | 1.779  |
| 46729 | 0.058  |
| 46733 | 3.598  |
| 46763 | 0.877  |
| 46801 | 0.035  |
| 46818 | 0.035  |
| 46844 | 0.207  |
| 46846 | 0.058  |
| 46848 | 0.098  |
| 46860 | 0.057  |
| 46898 | 0.058  |
| 46904 | 0.058  |
| 46906 | 0.058  |
| 46919 | 0.813  |
| 46920 | 0.813  |
| 46921 | 0.048  |
| 46925 | 0.057  |
| 46940 | 0.433  |
| 46942 | 0.098  |
| 46967 | 0.023  |
| 46968 | 0.023  |
| 46970 | 0.037  |
| 46987 | 0.038  |
| 47003 | 0.128  |
| 47071 | 0.041  |
| 47072 | 45.472 |
| 47081 | 0.057  |
| 47116 | 0.058  |
| 47154 | 1.276  |
| 47200 | 0.877  |
| 47211 | 0.058  |
| 47350 | 0.603  |
| 47399 | 2.224  |
| 47401 | 0.061  |
| 47413 | 9.402  |
| 47460 | 2.224  |
| 47501 | 0.207  |
| 47508 | 0.058  |
| 47555 | 4.409  |
| 47579 | 0.042  |

|       |       |
|-------|-------|
| 47671 | 7.562 |
| 47672 | 7.562 |
| 47706 | 0.013 |
| 47753 | 0.787 |
| 47759 | 7.04  |
| 47816 | 0.577 |
| 47820 | 0.076 |
| 47834 | 0.058 |
| 47847 | 0.051 |
| 47854 | 0.046 |
| 47867 | 1.301 |
| 47919 | 0.038 |
| 47949 | 1.041 |
| 47952 | 0.051 |
| 47985 | 0.046 |
| 47994 | 0.045 |
| 48004 | 0.051 |
| 48035 | 0.072 |
| 48059 | 0.057 |
| 48060 | 0.072 |
| 48062 | 0.057 |
| 48064 | 6.291 |
| 48065 | 0.035 |
| 48066 | 0.057 |
| 48071 | 0.052 |
| 48084 | 0.936 |
| 48090 | 0.541 |
| 48128 | 0.71  |
| 48129 | 0.877 |
| 48133 | 0.044 |
| 48136 | 0.038 |
| 48138 | 0.057 |
| 48148 | 0.71  |
| 48153 | 0.128 |
| 48157 | 0.877 |
| 48158 | 7.562 |
| 48161 | 0.098 |
| 48178 | 0.058 |
| 48183 | 0.493 |
| 48216 | 0.95  |
| 48218 | 0.311 |
| 48253 | 1.15  |
| 48259 | 7.562 |
| 48295 | 0.877 |
| 48301 | 0.877 |

|       |       |
|-------|-------|
| 48311 | 0.051 |
| 48326 | 0.936 |
| 48330 | 0.877 |
| 48354 | 0.877 |
| 48413 | 7.562 |
| 48434 | 7.562 |
| 48444 | 0.877 |
| 48483 | 7.562 |
| 48526 | 1.343 |
| 48535 | 0.058 |
| 48546 | 0.048 |
| 48561 | 0.877 |
| 48562 | 0.936 |
| 48568 | 0.057 |
| 48571 | 6.731 |
| 48597 | 0.058 |
| 48604 | 4.409 |
| 48622 | 0.877 |
| 48644 | 0.048 |
| 48675 | 0.061 |
| 48738 | 0.936 |
| 48775 | 0.051 |
| 48810 | 0.023 |
| 48816 | 0.877 |
| 48871 | 0.076 |
| 48880 | 7.562 |
| 48913 | 7.562 |
| 48964 | 0.057 |
| 49059 | 0.057 |
| 49096 | 0.058 |
| 49105 | 0.058 |
| 49132 | 0.603 |
| 49133 | 0.936 |
| 49219 | 0.877 |
| 49266 | 0.936 |
| 49277 | 0.057 |
| 49314 | 0.877 |
| 49323 | 0.406 |
| 49324 | 0.29  |
| 49395 | 8.77  |
| 49417 | 0.058 |
| 49432 | 0.936 |
| 49524 | 0.877 |
| 49575 | 0.058 |
| 49742 | 0.229 |

|       |       |
|-------|-------|
| 49787 | 0.945 |
| 49788 | 0.603 |
| 49791 | 3.025 |
| 49849 | 0.058 |
| 49862 | 0.603 |
| 49940 | 0.229 |
| 49976 | 4.409 |
| 50058 | 0.057 |
| 50059 | 0.359 |
| 50095 | 0.229 |
| 50117 | 0.936 |
| 50166 | 0.877 |
| 50232 | 0.877 |
| 50266 | 0.057 |
| 50269 | 0.207 |
| 50314 | 0.098 |
| 50317 | 0.207 |
| 50343 | 0.052 |
| 50363 | 0.936 |
| 50380 | 0.378 |
| 50421 | 0.038 |
| 50428 | 5.06  |
| 50468 | 0.038 |
| 50482 | 0.058 |
| 50504 | 0.058 |
| 50513 | 4.409 |
| 50532 | 0.044 |
| 50602 | 0.057 |
| 50628 | 0.048 |
| 50652 | 0.936 |
| 50659 | 0.128 |
| 50671 | 2.518 |
| 50726 | 3.025 |
| 50733 | 0.461 |
| 50785 | 0.057 |
| 50813 | 0.061 |
| 50862 | 0.541 |
| 50881 | 0.058 |
| 50929 | 2.518 |
| 50947 | 0.29  |
| 51084 | 0.051 |
| 51099 | 0.057 |
| 51118 | 0.072 |
| 51235 | 3.598 |
| 51237 | 0.603 |

|       |       |
|-------|-------|
| 51242 | 0.098 |
| 51284 | 0.718 |
| 51293 | 0.057 |
| 51327 | 0.051 |
| 51339 | 0.061 |
| 51343 | 0.076 |
| 51360 | 0.045 |
| 51381 | 0.058 |
| 51384 | 0.945 |
| 51595 | 0.877 |
| 51611 | 3.025 |
| 51614 | 0.057 |
| 51644 | 0.051 |
| 51769 | 0.936 |
| 51789 | 0.461 |
| 51808 | 0.424 |
| 51819 | 0.058 |
| 51827 | 0.064 |
| 51828 | 0.936 |
| 51829 | 0.045 |
| 51896 | 3.578 |
| 51923 | 0.061 |
| 51937 | 0.038 |
| 51943 | 0.936 |
| 52009 | 0.057 |
| 52085 | 0.051 |
| 52141 | 0.061 |
| 52154 | 0.057 |
| 52178 | 0.493 |
| 52216 | 0.229 |
| 52217 | 0.461 |
| 52220 | 1.93  |
| 52229 | 0.603 |
| 52338 | 0.057 |
| 52389 | 0.057 |
| 52400 | 0.71  |
| 52420 | 0.359 |
| 52455 | 0.877 |
| 52495 | 0.046 |
| 52509 | 6.291 |
| 52547 | 1.15  |
| 52592 | 0.461 |
| 52605 | 0.046 |
| 52617 | 0.936 |
| 52714 | 0.517 |



|       |        |
|-------|--------|
| 52785 | 6.915  |
| 52809 | 0.461  |
| 52856 | 0.057  |
| 52867 | 0.032  |
| 52888 | 0.038  |
| 52889 | 0.057  |
| 52929 | 0.038  |
| 52931 | 0.098  |
| 52948 | 0.877  |
| 52956 | 0.603  |
| 52966 | 0.058  |
| 52977 | 0.29   |
| 53062 | 17.128 |
| 53079 | 0.041  |
| 53106 | 4.409  |
| 53113 | 0.461  |
| 53116 | 0.945  |
| 53164 | 0.076  |
| 53181 | 7.562  |
| 53208 | 0.877  |
| 53287 | 0.051  |
| 53296 | 0.072  |
| 53331 | 0.936  |
| 53345 | 0.057  |
| 53384 | 0.057  |
| 53397 | 0.936  |
| 53417 | 7.562  |
| 53576 | 0.861  |
| 53600 | 0.128  |
| 53604 | 0.057  |
| 53617 | 0.057  |
| 53626 | 0.098  |
| 53639 | 0.046  |
| 53679 | 0.051  |
| 53700 | 0.045  |
| 53702 | 0.051  |
| 53709 | 0.962  |
| 53784 | 0.357  |
| 53803 | 0.057  |
| 53918 | 4.409  |
| 53929 | 0.71   |
| 53952 | 0.058  |
| 53961 | 1.236  |
| 53980 | 0.045  |
| 53999 | 0.128  |

|       |        |
|-------|--------|
| 54017 | 0.633  |
| 54021 | 0.311  |
| 54023 | 0.046  |
| 54063 | 42.859 |
| 54075 | 0.057  |
| 54085 | 0.962  |
| 54137 | 0.048  |
| 54179 | 0.058  |
| 54304 | 0.098  |
| 54353 | 0.877  |
| 54354 | 0.044  |
| 54406 | 0.192  |
| 54463 | 0.057  |
| 54476 | 0.098  |
| 54484 | 6.291  |
| 54514 | 0.048  |
| 54518 | 0.057  |
| 54520 | 0.633  |
| 54660 | 0.424  |
| 54694 | 3.578  |
| 54713 | 0.058  |
| 54783 | 0.045  |
| 54790 | 0.962  |
| 54806 | 5.928  |
| 54853 | 0.877  |
| 54870 | 0.052  |
| 54877 | 0.036  |
| 54906 | 1.225  |
| 54979 | 6.731  |
| 55009 | 0.098  |
| 55044 | 0.051  |
| 55052 | 0.5    |
| 55099 | 0.311  |
| 55129 | 0.058  |
| 55139 | 0.036  |
| 55153 | 0.048  |
| 55206 | 0.262  |
| 55221 | 7.562  |
| 55233 | 0.048  |
| 55245 | 0.877  |
| 55309 | 0.038  |
| 55313 | 0.048  |
| 55418 | 0.058  |
| 55425 | 0.107  |
| 55434 | 0.048  |

|       |        |
|-------|--------|
| 55454 | 0.098  |
| 55465 | 0.051  |
| 55486 | 0.098  |
| 55491 | 0.032  |
| 55505 | 0.045  |
| 55530 | 0.041  |
| 55535 | 0.072  |
| 55582 | 0.718  |
| 55624 | 0.072  |
| 55752 | 11.573 |
| 55817 | 0.877  |
| 55825 | 0.013  |
| 55832 | 4.409  |
| 55839 | 0.458  |
| 55852 | 0.458  |
| 55894 | 0.098  |
| 55913 | 0.057  |
| 55970 | 0.596  |
| 56006 | 0.058  |
| 56022 | 0.962  |
| 56039 | 0.098  |
| 56046 | 0.058  |
| 56071 | 0.603  |
| 56078 | 0.311  |
| 56106 | 0.453  |
| 56171 | 0.051  |
| 56178 | 2.37   |
| 56202 | 10.546 |
| 56205 | 0.058  |
| 56213 | 0.048  |
| 56266 | 0.051  |
| 56275 | 0.035  |
| 56282 | 0.603  |
| 56340 | 0.051  |
| 56441 | 0.936  |
| 56461 | 0.051  |
| 56491 | 0.541  |
| 56549 | 0.058  |
| 56554 | 0.453  |
| 56558 | 0.603  |
| 56559 | 0.051  |
| 56565 | 0.038  |
| 56566 | 0.058  |
| 56584 | 0.718  |
| 56651 | 0.052  |

|       |       |
|-------|-------|
| 56665 | 0.461 |
| 56670 | 3.598 |
| 56671 | 4.4   |
| 56688 | 6.291 |
| 56762 | 0.453 |
| 56788 | 0.633 |
| 56817 | 0.038 |
| 56898 | 0.207 |
| 56925 | 0.045 |
| 56945 | 0.058 |
| 57006 | 0.076 |
| 57007 | 0.023 |
| 57027 | 0.962 |
| 57033 | 0.461 |
| 57045 | 0.057 |
| 57052 | 0.945 |
| 57097 | 0.051 |
| 57107 | 0.032 |
| 57112 | 0.048 |
| 57120 | 0.042 |
| 57139 | 0.59  |
| 57162 | 0.057 |
| 57197 | 0.041 |
| 57297 | 0.064 |
| 57353 | 0.051 |
| 57370 | 0.045 |
| 57381 | 0.128 |
| 57433 | 0.058 |
| 57454 | 0.886 |
| 57465 | 0.058 |
| 57475 | 0.035 |
| 57487 | 0.051 |
| 57523 | 0.052 |
| 57527 | 0.072 |
| 57545 | 0.603 |
| 57623 | 4.409 |
| 57649 | 0.072 |
| 57650 | 0.058 |
| 57750 | 4.409 |
| 57752 | 0.057 |
| 57839 | 0.038 |
| 57865 | 0.051 |
| 57900 | 0.051 |
| 57929 | 0.058 |
| 57943 | 0.813 |

|       |       |
|-------|-------|
| 57972 | 0.032 |
| 58039 | 1.928 |
| 58048 | 0.057 |
| 58071 | 0.057 |
| 58114 | 0.945 |
| 58129 | 0.29  |
| 58190 | 0.71  |
| 58213 | 0.098 |
| 58217 | 0.229 |
| 58221 | 0.045 |
| 58248 | 6.291 |
| 58273 | 0.378 |
| 58279 | 0.235 |
| 58288 | 0.051 |
| 58290 | 0.046 |
| 58298 | 0.052 |
| 58316 | 0.046 |
| 58382 | 0.042 |
| 58383 | 0.05  |
| 58415 | 0.057 |
| 58472 | 0.357 |
| 58493 | 0.945 |
| 58499 | 4.315 |
| 58501 | 0.051 |
| 58523 | 0.05  |
| 58526 | 0.058 |
| 58572 | 0.076 |
| 58582 | 0.058 |
| 58636 | 0.058 |
| 58652 | 0.098 |
| 58708 | 0.098 |
| 58710 | 15    |
| 58737 | 0.962 |
| 58743 | 0.058 |
| 58766 | 7.888 |
| 58842 | 0.207 |
| 58848 | 0.058 |
| 58853 | 0.461 |
| 58855 | 0.051 |
| 58888 | 0.061 |
| 58960 | 0.042 |
| 59057 | 7.04  |
| 59067 | 0.057 |
| 59131 | 0.058 |
| 59147 | 0.104 |

|       |       |
|-------|-------|
| 59161 | 0.032 |
| 59203 | 0.936 |
| 59246 | 0.098 |
| 59289 | 0.311 |
| 59392 | 7.9   |
| 59442 | 0.051 |
| 59473 | 5.928 |
| 59479 | 0.051 |
| 59490 | 3.092 |
| 59553 | 0.057 |
| 59562 | 0.098 |
| 59584 | 0.633 |
| 59595 | 0.057 |
| 59599 | 0.058 |
| 59618 | 3.95  |
| 59678 | 0.493 |
| 59705 | 0.058 |
| 59820 | 0.032 |
| 59865 | 0.461 |
| 59878 | 0.045 |
| 59880 | 0.207 |
| 59970 | 0.378 |
| 59978 | 0.044 |
| 59986 | 0.051 |
| 59989 | 0.044 |
| 60035 | 0.057 |
| 60053 | 0.101 |

Source: BNF unit costs (2013 UK pounds). Available online: [http://www.bnf.org/bnf/org\\_450080.htm](http://www.bnf.org/bnf/org_450080.htm).

Note(1): Product code descriptions available from <https://www.cprd.com/ObservationalData/CodedData.asp#DrugsinPrimarycare>.
